# Supplementary material for: FSHD Myotubes with Different Phenotypes Exhibit Distinct Proteomes
Source: PLoS One. 2012 Dec 18;7(12):e51865. doi: 10.1371/journal.pone.0051865 (PMC3525578; doi:10.1371/journal.pone.0051865)
Supplement: Table S4 — Quantitative proteomics data (A) and bibliographic information related to myosin heavy (B) and light (C) chain isoforms. (A) AC: UniProt accession number; Score: -10*Log (P), where P is the probability that the observed match is a random event; H/L: fold change; SD: geometric standard deviation; #: number of peptides used for quantification; *: statistical significance assessed by Student’s t-test (p<0.05). The proteins with a fold change >1.5 are highlighted in red, >1.2 in pink, <0.7 in green, and 0.7–0.8 in light green. TE: total extract; NE: fraction enriched in nuclear proteins. (B) Information related to myosin heavy chain (MYH: upper panel) types, functions and mutations as given in the UniProt database and in [57]. The role of the non-muscle myosin MYH9 in myoblast differentiation was described in [58]. (C) Biological processes that involve myosin light chains (MYL: bottom panel) were identified in the UniProt database (Gene Ontology annotation). (XLSX) [file pone.0051865.s008.xlsx]

## Sheet: Table S4A
Table S4. Quantitative proteomics data (A) and bibliographic information related to myosin heavy (B) and light (C) chain isoforms.
H/L>1.5
H/L>1.3
H/L>1.2
0.7<H/L<0.8
H/L<0.70
A	Entry name	dFSHD12_TE				dFSHD12_NE				aFSHD3_TE				aFSHD3_NE
	UniprotAC|Gene	Score	H/L	SD	#	Score	H/L	SD	#	Score	H/L	SD	#	Score	H/L	SD	#
	P11055|MYH3	2880	1.16	NN	22	4961	1.13*	1.26	40	1923	0.53	NN	20	2881	0.57*	1.25	28
	P12883|MYH7	933	1.06		1	1720	1.03	1.15	5	666	0.77	1.22	3	1228	0.73	1.3	5
	Q9UKX2|MYH2	1202				2102	1.13	1.14	3					1103	0.78	1.08	2
	P13535|MYH8	1308	0.87		1	1957	0.76	1.3	4	905	0.51*	1.32	5	1063	0.45*	1.07	3
	P35579|MYH9	1026	1.14	1.3	16	3425	0.80*	1.35	36	1668	1.38*	1.26	29	3890	1.37*	1.31	43
	Q7Z406|MYH14													159	1.23		1
	P12829|MYL4	183				333	1.37	1.19	3	164	1.02	1.39	2	789	0.97	1.24	4
	O14950|ML12B	86								101	1.13*	1.06	4	523	1.44*	1	2
	P24844|MYL9	86				319	1.07		1					440	1.7		1
	P14649|MYL6B	213	1.05	1.04	2	382	1.24	1.15	2	359	0.83*	1.09	4	365	0.77*	1.05	5
	P60660|MYL6	176				356	0.95	1.18	2	296	1.26	1.16	3	318	1.57*	1.02	2
	P05976|MYL1	146	1.07	1.31	2	223	0.89	1.11	2	120	0.55	1.72	2	194
	Q96A32|MLRS	319	1.05	1.16	2	177	1.29		1	215	0.54*	1.17	4	139	0.51*	1.07	2
	Q13203|MYBPH	77	0.74		1	79				46	0.58		1	53

## Sheet: Table S4B
B	Gene	Protein	Fiber type_Functions	Mutation
	MYH3	Embryonic MyHC	Fetal development	Freeman-Sheldon syndrome, Sheldon-Hall syndrome : congenital joint contracture with predominant distal involvement and facial dysmorphism
			Muscle regeneration
	MYH7	MyHC I, β-Cardiac	Skeletal muscle type 1 (slow oxydative)	Familial hypertrophic/dilated cardiomyopathy, Laing early onset distal myopathy, myosin storage myopathy (weakness of limb girdle, scapuloperoneal or distal muscles)
			Cardiac ventricles
	MYH2	MyHC IIa	Sketetal muscle type 2A (fast oxydative)	Autosomal dominant myopathy with congenital joint contractures, ophtalmoplegia and rimmed vacuoles.
	MYH8	Perinatal MyHC	Fetal development	Trismus and pseudocamptodactyly syndrome: congenital contracture of hands, feet and jaws with trismus and hand and foot deformities.
			Muscle regeneration
	MYH9	Non-muscle MyHC IIa	Cell motility, adhesion, shape	Variable syndromes comprising macrothrombocytopenia,
			Secretion, capping processes	ocular lesions, sensorineural hearing loss, nephritis.
			Myoblast differentiation (alignment/fusion)
	MYH14	Non-muscle MyHC IIc	Cell motility, adhesion, shape	Deafness autosomal dominant type 4 (DFNA4)
			Secretion, capping

## Sheet: Table S4C
C	Gene	Protein	Biological process (Gene Ontology)
	MYL4	Myosin light chain 1, embryonic muscle/atrial isoform	Cardiac muscle contraction
			Muscle filament sliding
			Muscle organ development
	ML12B/	Myosin regulatory light chain 2-B/2, smooth muscle isoform	Regulation of smooth muscle and non-muscle cell contractile activity via its phosphorylation.
	MYL9		Cytokinesis, receptor capping, and cell locomotion
	MYL6B	Myosin light chain 6B (Myosin light chain 1 slow-twitch muscle A isoform, Smooth muscle and non-muscle myosin light chain alkali 6B)	Muscle filament sliding
			Skeletal muscle tissue development
	MYL6	Myosin light polypeptide 6 (Myosin light chain alkali 3, Smooth muscle and non-muscle myosin light chain alkali 6	Axon guidance
			Muscle filament sliding
			Skeletal muscle tissue development
	MYL1	Myosin light chain 1/3, skeletal muscle isoform	Muscle filament sliding
			Muscle organ development
	MLRS	Myosin regulatory light chain 2, skeletal muscle isoform	Skeletal muscle tissue development
	MYBPH	Myosin-binding protein H	Cell adhesion
			Regulation of striated muscle contraction
