# Supplementary material for: FSHD Myotubes with Different Phenotypes Exhibit Distinct Proteomes
Source: PLoS One. 2012 Dec 18;7(12):e51865. doi: 10.1371/journal.pone.0051865 (PMC3525578; doi:10.1371/journal.pone.0051865)
Supplement: Table S6 — Raw data: analysis #P2 and #P3. (XLSX) [file pone.0051865.s010.xlsx]

## Sheet: NE vs TE 
KEY	IMPORTKEY Analysis #P2 Total extracts (TE)	IMPORTKEY Analysis #P3 Nuclear extracts (NE)	UNIPROT	GENE	DESC	TAX	Analysis #P2_Total extracts (TE)	Analysis #P3_Nuclear extracts (NE)	TM	SIGNAL	Loc (Target P)	Loc (WoLF PSORT)	Loc (IPA)	Loc (UniprotkB)	GO_SLIM_CC	GO_SLIM_BP	GO_SLIM_MF	UniProtKB_Subcellular locations	UniProtKB_Protein family	UniProtKB_Domains	UniProtKB_Pathway
A6NIH7	U119B_HUMAN		A6NIH7	UNC119B	Protein unc-119 homolog B	Homo sapiens	X		0		_	cyto	-	-					PDE6D/unc-119 family
A6NIZ1	RP1BL_HUMAN		A6NIZ1	RAP1BL	Ras-related protein Rap-1b-like protein	Homo sapiens	X		0		_	cyto	plas	plas,cyto	membrane,cytoplasm,cytosol	regulation of biological process,cell organization and biogenesis,metabolic process,cell proliferation,transport,cell communication	catalytic activity,nucleotide binding,protein binding	Cell membrane. Cytoplasm > cytosol.	Small GTPase superfamily, Ras family
O00159-3	MYO1C_HUMAN	MYO1C_HUMAN	O00159-3	MYO1C	Isoform 3 of Myosin-Ic	Homo sapiens	X	X	1		_	cyto	cyto	cyto,plas,plas,nucl,nucl,nucl	membrane,cytoplasm,nucleus,organelle lumen,cytoskeleton	transport	catalytic activity,nucleotide binding,protein binding,motor activity	Cytoplasm. Cell membrane. Cell projection > stereocilium membrane. Nucleus > nucleoplasm. Nucleus > nucleolus. Nucleus > nuclear pore complex.		IQ domains (2); Myosin head-like domain (1)
O00264	PGRC1_HUMAN		O00264	PGRMC1	Membrane-associated progesterone receptor component 1	Homo sapiens	X		0	S	_	nucl	plas	E.R.,E.R.	membrane,cytoplasm,endoplasmic reticulum,nucleus,extracellular,mitochondrion,organelle lumen,cell surface	cell differentiation,cellular component movement,development,cell organization and biogenesis,metabolic process,response to stimulus	catalytic activity,nucleotide binding,metal ion binding,signal transducer activity,protein binding,receptor activity	Microsome membrane; Single-pass membrane protein. Endoplasmic reticulum membrane; Single-pass membrane protein.	Cytochrome b5 family, MAPR subfamily	Cytochrome b5 heme-binding domain (1)
O00299		CLIC1_HUMAN	O00299	CLIC1	Chloride intracellular channel protein 1	Homo sapiens		X	1		_	cyto	nucl	nucl,nucl,cyto,plas	membrane,Golgi,cytoplasm,nucleus,cytosol	defense response,regulation of biological process,cell organization and biogenesis,response to stimulus,transport,cell communication	structural molecule activity,protein binding,transporter activity	Nucleus. Nucleus membrane; Single-pass membrane protein. Cytoplasm. Cell membrane; Single-pass membrane protein.	Chloride channel CLIC family	GST C-terminal domain (1)
O00303	EIF3F_HUMAN		O00303	EIF3F	Eukaryotic translation initiation factor 3 subunit F	Homo sapiens	X		0		_	mito	cyto	cyto	ribosome,cytoplasm,cytosol,extracellular	cell differentiation,regulation of biological process,cell organization and biogenesis,metabolic process,response to stimulus	translation regulator activity,catalytic activity,structural molecule activity,protein binding,RNA binding	Cytoplasm.	EIF-3 subunit F family	MPN (JAB/Mov34) domain (1)
O00487		PSDE_HUMAN	O00487	PSMD14	26S proteasome non-ATPase regulatory subunit 14	Homo sapiens		X	0		_	cyto	cyto	-	proteasome,cytoplasm,nucleus,cytosol,organelle lumen	regulation of biological process,metabolic process,cell death,response to stimulus	catalytic activity,metal ion binding,protein binding,enzyme regulator activity		Peptidase M67A family, PSMD14 subfamily	MPN (JAB/Mov34) domain (1)
O00499-9	BIN1_HUMAN	BIN1_HUMAN	O00499-9	BIN1	Isoform BIN1-10-13 of Myc box-dependent-interacting protein 1	Homo sapiens	X	X	0		_	cyto	nucl	nucl,cyto	cytoplasm,nucleus,extracellular,cytoskeleton	defense response,regulation of biological process,cell differentiation,development,cell organization and biogenesis,cell proliferation,metabolic process,response to stimulus,transport	protein binding	Nucleus. Cytoplasm.		BAR domain (1); SH3 domain (1)
O00541-2		PESC_HUMAN	O00541-2	PES1	Isoform 2 of Pescadillo homolog	Homo sapiens		X	1		_	cyto_nucl	nucl	nucl,nucl,nucl	nucleus,organelle lumen,chromosome	regulation of biological process,cell organization and biogenesis,cell proliferation,metabolic process	protein binding	Nucleus > nucleolus. Nucleus > nucleoplasm. Chromosome.	Pescadillo family	BRCT domain (1)
O00566		MPP10_HUMAN	O00566	MPHOSPH10	U3 small nucleolar ribonucleoprotein protein MPP10	Homo sapiens		X	0		M	nucl	nucl	nucl,nucl	nucleus,organelle lumen,chromosome	cell organization and biogenesis,metabolic process	protein binding,RNA binding	Nucleus > nucleolus. Chromosome.	MPP10 family
O00567		NOP56_HUMAN	O00567	NOP56	Nucleolar protein 56	Homo sapiens		X	2		S	nucl	nucl	nucl	nucleus,organelle lumen	cell organization and biogenesis,metabolic process	catalytic activity,protein binding,RNA binding	Nucleus > nucleolus.	NOP5/NOP56 family	Nop domain (1)
O00571		DDX3X_HUMAN	O00571	DDX3X	ATP-dependent RNA helicase DDX3X	Homo sapiens		X	0		_	nucl	nucl	nucl,cyto	membrane,cytoplasm,nucleus,organelle lumen	defense response,reproduction,metabolic process,response to stimulus	catalytic activity,DNA binding,nucleotide binding,protein binding,RNA binding	Nucleus speckle. Cytoplasm.	DEAD box helicase family, DDX3/DED1 subfamily	Helicase ATP-binding domain (1); Helicase C-terminal domain (1)
O14773-2	TPP1_HUMAN		O14773-2	TPP1	Isoform 2 of Tripeptidyl-peptidase 1	Homo sapiens	X		0		S	extr	cyto	lyso,cyve	cytoplasm,extracellular,vacuole,mitochondrion	regulation of biological process,development,cell organization and biogenesis,metabolic process,cell death	catalytic activity,protein binding	Lysosome. Melanosome.	Peptidase S53 family
O14776-2		TCRG1_HUMAN	O14776-2	TCERG1	Isoform 2 of Transcription elongation regulator 1	Homo sapiens		X	0		_	nucl	nucl	nucl	membrane,nucleus	regulation of biological process,metabolic process,cell communication	DNA binding,transcription regulator activity,structural molecule activity,signal transducer activity,protein binding,receptor activity	Nucleus.		FF domains (6); WW domains (3)
O14908		GIPC1_HUMAN	O14908	GIPC1	PDZ domain-containing protein GIPC1	Homo sapiens		X	0		_	nucl	cyto	cyto,plas	membrane,cytoplasm,cytosol	regulation of biological process,cellular component movement,cell organization and biogenesis,metabolic process,transport,cell communication	signal transducer activity,protein binding,enzyme regulator activity	Cytoplasm. Membrane; Peripheral membrane protein.	GIPC family	PDZ (DHR) domain (1)
O14950	ML12B_HUMAN		O14950	MYL12B	Myosin regulatory light chain 12B	Homo sapiens	X		0		_	mito	cyto	-	cytoplasm,cytosol,cytoskeleton	cell differentiation,development,cell organization and biogenesis,metabolic process,response to stimulus	catalytic activity,nucleotide binding,metal ion binding,motor activity			EF-hand domains (3)
O14974-4		MYPT1_HUMAN	O14974-4	PPP1R12A	Isoform 4 of Protein phosphatase 1 regulatory subunit 12A	Homo sapiens		X	0		_	nucl	cyto	cyto	cytoplasm,cytoskeleton	regulation of biological process,metabolic process,transport	catalytic activity,signal transducer activity,protein binding	Cytoplasm.		ANK repeats (6)
O14979-3	HNRDL_HUMAN		O14979-3	HNRPDL	Isoform 3 of Heterogeneous nuclear ribonucleoprotein D-like	Homo sapiens	X		0		_	mito	nucl	nucl,cyto	cytoplasm,nucleus	regulation of biological process,metabolic process	DNA binding,nucleotide binding,protein binding,RNA binding	Nucleus. Cytoplasm.		RRM (RNA recognition motif) domains (2)
O15020-2		SPTN2_HUMAN	O15020-2	SPTBN2	Isoform 2 of Spectrin beta chain, brain 2	Homo sapiens		X	1		_	cyto	cyto	cyto,cyto	membrane,cytoplasm,cytosol,cytoskeleton	regulation of biological process,cell differentiation,development,cell organization and biogenesis,cell death,response to stimulus,transport,cell communication	structural molecule activity,protein binding	Cytoplasm > cytoskeleton. Cytoplasm > cell cortex.	Spectrin family	CH (calponin-homology) domains (2); PH domain (1); Spectrin repeats (17)
O15075-1		DCAK1_HUMAN	O15075-1	DCLK1	Serine/threonine-protein kinase DCLK1	Homo sapiens		X	1		_	cyto	cyto	-	membrane	regulation of biological process,cell differentiation,cellular component movement,development,cell organization and biogenesis,cell growth,metabolic process,response to stimulus,transport,cell communication	catalytic activity,nucleotide binding,signal transducer activity,protein binding		Protein kinase superfamily, CAMK Ser/Thr protein kinase family, CaMK subfamily	Doublecortin domains (2); Protein kinase domain (1)
O15075-4	DCLK1_HUMAN		O15075-4	DCLK1	Isoform 4 of Serine/threonine-protein kinase DCLK1	Homo sapiens	X		1		_	cyto	cyto	-	membrane	cell differentiation,development,cellular component movement,cell organization and biogenesis,cell growth,metabolic process,response to stimulus,transport	catalytic activity,nucleotide binding,signal transducer activity,protein binding		Protein kinase superfamily, CAMK Ser/Thr protein kinase family, CaMK subfamily	Doublecortin domains (2); Protein kinase domain (1)
O15143		ARC1B_HUMAN	O15143	ARPC1B	Actin-related protein 2/3 complex subunit 1B	Homo sapiens		X	0		_	cyto	cyto	cyto	membrane,cytoplasm,cytoskeleton	regulation of biological process,cellular component movement,cell organization and biogenesis	structural molecule activity,protein binding	Cytoplasm > cytoskeleton.	WD repeat ARPC1 family	WD repeats (6)
O15145		ARPC3_HUMAN	O15145	ARPC3	Actin-related protein 2/3 complex subunit 3	Homo sapiens		X	0		_	cyto	cyto	cyto,plas	cytoplasm,cytoskeleton	regulation of biological process,cellular component movement,cell organization and biogenesis,metabolic process	structural molecule activity,protein binding	Cytoplasm > cytoskeleton. Cell projection.	ARPC3 family
O15173	PGRC2_HUMAN		O15173	PGRMC2	Membrane-associated progesterone receptor component 2	Homo sapiens	X		1		_	cyto	nucl	plas	membrane,cytoplasm,extracellular	defense response,regulation of biological process,cell organization and biogenesis,metabolic process,response to stimulus,cell communication	catalytic activity,nucleotide binding,signal transducer activity,metal ion binding,protein binding,receptor activity	Membrane; Single-pass membrane protein.	Cytochrome b5 family, MAPR subfamily	Cytochrome b5 heme-binding domain (1)
O15371		IF37_HUMAN	O15371	EIF3D	Eukaryotic translation initiation factor 3 subunit D	Homo sapiens		X	0		_	cyto	cyto	cyto	cytoplasm,cytosol	regulation of biological process,cell differentiation,cell organization and biogenesis,metabolic process	translation regulator activity,catalytic activity,nucleotide binding,protein binding,RNA binding	Cytoplasm.	EIF-3 subunit D family
O15460-2	P4HA2_HUMAN	P4HA2_HUMAN	O15460-2	P4HA2	Isoform IIa of Prolyl 4-hydroxylase subunit alpha-2	Homo sapiens	X	X	0	S	S	extr	cyto	E.R.	cytoplasm,endoplasmic reticulum,extracellular,organelle lumen	metabolic process	catalytic activity,metal ion binding,protein binding	Endoplasmic reticulum lumen.	P4HA family	Fe2OG dioxygenase domain (1); TPR repeat (1)
O43159		HUCE1_HUMAN	O43159	RRP8	Ribosomal RNA-processing protein 8	Homo sapiens		X	0		_	nucl	nucl	nucl,nucl	cytoplasm,nucleus,organelle lumen,chromosome	regulation of biological process,reproduction,conjugation,cell organization and biogenesis,metabolic process,response to stimulus	catalytic activity,protein binding	Nucleus > nucleolus. Nucleus > nucleolus.	Methyltransferase superfamily, RRP8 family
O43290-1		SNUT1_HUMAN	O43290-1	SART1	U4/U6.U5 tri-snRNP-associated protein 1	Homo sapiens		X	0		_	nucl	nucl	nucl	spliceosomal complex,membrane,endosome,cytoplasm,cytosol,nucleus,organelle lumen	defense response,cell differentiation,regulation of biological process,development,cell organization and biogenesis,metabolic process,cell death,response to stimulus,transport,cell communication	catalytic activity,nucleotide binding,metal ion binding,protein binding,enzyme regulator activity	Nucleus.	SNU66/SART1 family
O43390-2	HNRPR_HUMAN	HNRPR_HUMAN	O43390-2	HNRNPR	Isoform 2 of Heterogeneous nuclear ribonucleoprotein R	Homo sapiens	X	X	0		_	nucl	nucl	nucl,cyto	spliceosomal complex,cytoplasm,nucleus,organelle lumen	metabolic process	nucleotide binding,protein binding,RNA binding	Nucleus > nucleoplasm. Cytoplasm.		RRM (RNA recognition motif) domains (3)
O43396		TXNL1_HUMAN	O43396	TXNL1	Thioredoxin-like protein 1	Homo sapiens		X	0		_	cyto	cyto	cyto	membrane,endosome,cytoplasm,cytosol,extracellular	cell differentiation,regulation of biological process,development,cellular homeostasis,metabolic process,cell death,response to stimulus,transport,cell communication	catalytic activity,antioxidant activity,protein binding,transporter activity	Cytoplasm.		Thioredoxin domain (1)
O43660-2		PLRG1_HUMAN	O43660-2	PLRG1	Isoform 2 of Pleiotropic regulator 1	Homo sapiens		X	0		_	nucl	nucl	nucl	spliceosomal complex,nucleus,organelle lumen	regulation of biological process,metabolic process	transcription regulator activity,signal transducer activity,protein binding	Nucleus speckle.	WD repeat PRL1/PRL2 family	WD repeats (7)
O43684-2		BUB3_HUMAN	O43684-2	BUB3	Isoform 2 of Mitotic checkpoint protein BUB3	Homo sapiens		X	0		_	nucl	nucl	nucl,nucl	cytoplasm,nucleus,cytosol,organelle lumen,chromosome	cell division,regulation of biological process,cell organization and biogenesis,cell proliferation,metabolic process	protein binding	Nucleus. Chromosome > centromere > kinetochore.	WD repeat BUB3 family	WD repeats (5)
O43707	ACTN4_HUMAN	ACTN4_HUMAN	O43707	ACTN4	Alpha-actinin-4	Homo sapiens	X	X	1		_	cyto	cyto	nucl,cyto	cytoplasm,nucleus,extracellular,organelle lumen,cytoskeleton	coagulation,regulation of biological process,cell differentiation,cellular component movement,cell organization and biogenesis,metabolic process,cell death,response to stimulus,transport	catalytic activity,nucleotide binding,structural molecule activity,signal transducer activity,metal ion binding,protein binding	Nucleus. Cytoplasm.	Alpha-actinin family	Actin-binding domain (1); CH (calponin-homology) domains (2); EF-hand domains (2); Spectrin repeats (4)
O43776		SYNC_HUMAN	O43776	NARS	Asparaginyl-tRNA synthetase, cytoplasmic	Homo sapiens		X	0		_	cyto	cyto	cyto	cytoplasm,cytosol,mitochondrion	metabolic process	catalytic activity,nucleotide binding,protein binding	Cytoplasm.	Class-II aminoacyl-tRNA synthetase family
O43795-2		MYO1B_HUMAN	O43795-2	MYO1B	Isoform 2 of Myosin-Ib	Homo sapiens		X	1		_	cyto	cyto	-	cytoskeleton		catalytic activity,nucleotide binding,protein binding,motor activity			IQ domains (6); Myosin head-like domain (1)
O43809	CPSF5_HUMAN	CPSF5_HUMAN	O43809	NUDT21	Cleavage and polyadenylation specificity factor subunit 5	Homo sapiens	X	X	0		M	mito	nucl	nucl	membrane,cytoplasm,nucleus,organelle lumen,cytoskeleton	cell organization and biogenesis,metabolic process,transport	catalytic activity,nucleotide binding,protein binding,RNA binding	Nucleus.	Nudix hydrolase family, CPSF5 subfamily	Nudix hydrolase domain (1)
O43852-2	CALU_HUMAN		O43852-2	CALU	Isoform 2 of Calumenin	Homo sapiens	X		0	S	S	extr	cyto	E.R.,extr,cyve,E.R.	Golgi,cytoplasm,endoplasmic reticulum,extracellular,organelle lumen	coagulation,response to stimulus,transport	metal ion binding,protein binding	Endoplasmic reticulum lumen. Secreted. Melanosome. Sarcoplasmic reticulum lumen.	CREC family	EF-hand domains (6)
O60282-2	KIF5C_HUMAN		O60282-2	KIF5C	Isoform 2 of Kinesin heavy chain isoform 5C	Homo sapiens	X		0		_	cyto	cyto	cyto	membrane,cytoplasm,cytoskeleton	cell differentiation,development,cell organization and biogenesis,response to stimulus,transport	catalytic activity,nucleotide binding,protein binding,motor activity	Cytoplasm > cytoskeleton.	Kinesin-like protein family, Kinesin subfamily	Kinesin-motor domain (1)
O60506-5	HNRPQ_HUMAN	HNRPQ_HUMAN	O60506-5	SYNCRIP	Isoform 5 of Heterogeneous nuclear ribonucleoprotein Q	Homo sapiens	X	X	0		_	nucl	nucl	cyto,E.R.,E.R.,nucl,nucl	spliceosomal complex,membrane,cytoplasm,endoplasmic reticulum,nucleus,organelle lumen	regulation of biological process,metabolic process	nucleotide binding,protein binding,RNA binding	Cytoplasm. Microsome. Endoplasmic reticulum. Nucleus. Nucleus > nucleoplasm.		RRM (RNA recognition motif) domains (3)
O60565-2		GREM1_HUMAN	O60565-2	GREM1	Isoform 2 of Gremlin-1	Homo sapiens		X	0	S	S	extr	extr	extr	extracellular,cell surface	regulation of biological process,cell differentiation,development,cellular component movement,cell organization and biogenesis,cell growth,metabolic process,cell death,response to stimulus,transport,cell communication	protein binding	Secreted.	DAN family	CTCK (C-terminal cystine knot-like) domain (1)
O60568		PLOD3_HUMAN	O60568	PLOD3	Procollagen-lysine,2-oxoglutarate 5-dioxygenase 3	Homo sapiens		X	1	S	S	extr	cyto	E.R.	membrane,cytoplasm,endoplasmic reticulum,extracellular	metabolic process,response to stimulus,transport	catalytic activity,metal ion binding,protein binding	Rough endoplasmic reticulum membrane; Peripheral membrane protein; Lumenal side.		Fe2OG dioxygenase domain (1)
O60662-2	KBTBA_HUMAN		O60662-2	KBTBD10	Isoform Short of Kelch repeat and BTB domain-containing protein 10	Homo sapiens	X		2		_	cyto	cyto	cyto,cyto,plas,plas	membrane,cytoplasm,nucleus,organelle lumen,cytoskeleton	regulation of biological process,cell organization and biogenesis,metabolic process,response to stimulus	catalytic activity,protein binding	Cytoplasm. Cytoplasm > cytoskeleton. Cell projection > pseudopodium. Cell projection > ruffle.		BTB (POZ) domain (1); Kelch repeats (5)	Protein modification; protein ubiquitination.
4206370		M6PBP_HUMAN	O60664-2	PLIN3	placental protein 17a1	Homo sapiens		X	0		_	cyto	cyto	cyto,endo,cyto	membrane,Golgi,endosome,cytoplasm	transport	protein binding	Cytoplasm. Endosome membrane; Peripheral membrane protein; Cytoplasmic side. Lipid droplet.	Perilipin family
O60763-1		VDP_HUMAN	O60763-1	USO1	General vesicular transport factor p115	Homo sapiens		X	2		_	cyto	cyto	cyto,golg	membrane,Golgi,cytoplasm,cytosol,cytoskeleton	cell organization and biogenesis,transport	protein binding,transporter activity	Cytoplasm > cytosol. Golgi apparatus membrane; Peripheral membrane protein.	VDP/USO1/EDE1 family	ARM repeats (10)
O60828-9		PQBP1_HUMAN	O60828-9	PQBP1	Isoform 9 of Polyglutamine-binding protein 1	Homo sapiens		X	0		_	nucl	nucl	nucl	cytoplasm,nucleus,organelle lumen	regulation of biological process,metabolic process	DNA binding,transcription regulator activity,protein binding	Nucleus.		WW domain (1)
O60832		DKC1_HUMAN	O60832	DKC1	H/ACA ribonucleoprotein complex subunit 4	Homo sapiens		X	2		_	cyto	nucl	nucl,nucl	nucleus,extracellular,organelle lumen	coagulation,regulation of biological process,cell organization and biogenesis,cell proliferation,metabolic process,response to stimulus,transport	catalytic activity,nucleotide binding,metal ion binding,protein binding,RNA binding	Nucleus > nucleolus. Nucleus > Cajal body.	Pseudouridine synthase truB family	PUA domain (1)
O60841		IF2P_HUMAN	O60841	EIF5B	Eukaryotic translation initiation factor 5B	Homo sapiens		X	2		_	cyto	cyto	cyto	cytoplasm,cytosol	regulation of biological process,cell organization and biogenesis,metabolic process	translation regulator activity,catalytic activity,nucleotide binding,protein binding,RNA binding	Cytoplasm.	IF-2 family
O75083-3		WDR1_HUMAN	O75083-3	WDR1	Isoform 2 of WD repeat-containing protein 1	Homo sapiens		X	1		_	cyto	extr	cyto	cytoplasm,cytosol,extracellular,cytoskeleton	coagulation,response to stimulus,transport	protein binding	Cytoplasm > cytoskeleton.	WD repeat AIP1 family	WD repeats (11)
O75112-6		LDB3_HUMAN	O75112-6	LDB3	Isoform 6 of LIM domain-binding protein 3	Homo sapiens		X	0		_	nucl	cyto	cyto,plas,cyto,cyto	cytoplasm,cytoskeleton		metal ion binding,protein binding	Cytoplasm > perinuclear region. Cell projection > pseudopodium. Cytoplasm > cytoskeleton. Cytoplasm > myofibril > sarcomere > Z-disk.		LIM zinc-binding domains (3); PDZ (DHR) domain (1)
O75367-3	H2AY_HUMAN	H2AY_HUMAN	O75367-3	H2AFY	Isoform 3 of Core histone macro-H2A.1	Homo sapiens	X	X	1		_	mito	nucl	nucl,nucl	cytoplasm,nucleus,cytoskeleton,chromosome	regulation of biological process,cell organization and biogenesis,metabolic process	DNA binding	Nucleus. Chromosome.		Histone H2A domain (1); Macro domain (1)
O75369-7		FLNB_HUMAN	O75369-7	FLNB	Isoform 7 of Filamin-B	Homo sapiens		X	0		_	cyto_nucl	cyto	cyto,cyto,cyto,cyto	membrane,cytoplasm,nucleus,cytoskeleton	cell differentiation,regulation of biological process,development,cell organization and biogenesis	protein binding	Cytoplasm > cell cortex. Cytoplasm > cytoskeleton. Cytoplasm > myofibril > sarcomere > Z-disk. Cytoplasm > cytoskeleton.	Filamin family	Actin-binding domain (1); CH (calponin-homology) domains (2); Filamin repeats (24)
O75396	SC22B_HUMAN		O75396	SEC22B	Vesicle-trafficking protein SEC22b	Homo sapiens	X		0		S	E.R._mito	cyto	E.R._golg,golg,E.R.,cyve	membrane,Golgi,cytoplasm,cytosol,endoplasmic reticulum	cell organization and biogenesis,metabolic process,transport	metal ion binding,protein binding	Endoplasmic reticulum-Golgi intermediate compartment membrane; Single-pass type IV membrane protein. Golgi apparatus membrane; Single-pass type IV membrane protein. Endoplasmic reticulum membrane; Single-pass type IV membrane protein. Melanosome.	Synaptobrevin family	Longin domain (1); V-SNARE coiled-coil homology domain (1)
O75475-2		PSIP1_HUMAN	O75475-2	PSIP1	Isoform 2 of PC4 and SFRS1-interacting protein	Homo sapiens		X	0		_	nucl	nucl	nucl	cytoplasm,cytosol,nucleus,organelle lumen,chromosome	regulation of biological process,reproduction,cell organization and biogenesis,metabolic process	DNA binding	Nucleus.	HDGF family	PWWP domain (1)
O75531		BAF_HUMAN	O75531	BANF1	Barrier-to-autointegration factor	Homo sapiens		X	0		_	extr	nucl	nucl,cyto,nucl	cytoplasm,nucleus,cytosol,organelle lumen,chromosome	reproduction,metabolic process,response to stimulus	catalytic activity,DNA binding,metal ion binding	Nucleus. Cytoplasm. Chromosome.	BAF family
O75533	SF3B1_HUMAN	SF3B1_HUMAN	O75533	SF3B1	Splicing factor 3B subunit 1	Homo sapiens	X	X	5		_	plas	nucl	nucl	spliceosomal complex,nucleus,organelle lumen	reproduction,development,metabolic process	nucleotide binding,protein binding,RNA binding	Nucleus speckle.	SF3B1 family	HEAT repeats (11)
O75643-2		U520_HUMAN	O75643-2	SNRNP200	Isoform 2 of U5 small nuclear ribonucleoprotein 200 kDa helicase	Homo sapiens		X	0		_	cyto	nucl	nucl	spliceosomal complex,nucleus,organelle lumen	cell organization and biogenesis,metabolic process,response to stimulus	catalytic activity,nucleotide binding,protein binding	Nucleus.	Helicase family, SKI2 subfamily	Helicase ATP-binding domains (2); Helicase C-terminal domains (2); SEC63 domains (2)
O75880		SCO1_HUMAN	O75880	SCO1	Protein SCO1 homolog, mitochondrial	Homo sapiens		X	1		M	mito	cyto	mito	membrane,cytoplasm,mitochondrion	cell differentiation,regulation of biological process,cell organization and biogenesis,cellular homeostasis,metabolic process,transport	catalytic activity,metal ion binding,antioxidant activity,protein binding	Mitochondrion.	SCO1/2 family
O75923-9	DYSF_HUMAN	DYSF_HUMAN	O75923-9	DYSF	Isoform 9 of Dysferlin	Homo sapiens	X	X	1		_	cyto	plas	plas,cyve	membrane,cytoplasm	cell organization and biogenesis,response to stimulus	protein binding	Cell membrane > sarcolemma; Single-pass type II membrane protein. Cytoplasmic vesicle membrane; Single-pass type II membrane protein.	Ferlin family	C2 domains (5)
O75940		SPF30_HUMAN	O75940	SMNDC1	Survival of motor neuron-related-splicing factor 30	Homo sapiens		X	0		_	nucl	nucl	nucl,nucl	spliceosomal complex,membrane,cytoplasm,nucleus,extracellular,organelle lumen	cell differentiation,regulation of biological process,cell organization and biogenesis,metabolic process,cell death,response to stimulus	catalytic activity,structural molecule activity,protein binding,RNA binding	Nucleus speckle. Nucleus > Cajal body.	SMN family	Tudor domain (1)
O75947-2	ATP5H_HUMAN		O75947-2	ATP5H	Isoform 2 of ATP synthase subunit d, mitochondrial	Homo sapiens	X		0		_	cyto	cyto	mito,mito	membrane,cytoplasm,mitochondrion	metabolic process,transport	catalytic activity,transporter activity	Mitochondrion. Mitochondrion inner membrane.	ATPase d subunit family
O76021		RL1D1_HUMAN	O76021	RSL1D1	Ribosomal L1 domain-containing protein 1	Homo sapiens		X	0		_	nucl	cyto	nucl	ribosome,cytoplasm,cytosol,nucleus,organelle lumen,chromosome	defense response,regulation of biological process,cell organization and biogenesis,metabolic process,response to stimulus,transport,cell communication	translation regulator activity,catalytic activity,nucleotide binding,transcription regulator activity,DNA binding,structural molecule activity,metal ion binding,protein binding,RNA binding	Nucleus > nucleolus.	Ribosomal protein L1P family
O94776		MTA2_HUMAN	O94776	MTA2	Metastasis-associated protein MTA2	Homo sapiens		X	0		_	cyto	nucl	nucl	membrane,cytoplasm,nucleus,extracellular,organelle lumen	regulation of biological process,cell organization and biogenesis,metabolic process,transport	catalytic activity,transcription regulator activity,nucleotide binding,DNA binding,metal ion binding,protein binding,transporter activity	Nucleus.		BAH domain (1); ELM2 domain (1); GATA-type zinc finger (1); SANT domain (1)
O94804		STK10_HUMAN	O94804	STK10	Serine/threonine-protein kinase 10	Homo sapiens		X	0		M	mito	cyto	-	membrane,cytoplasm,extracellular	metabolic process,transport	catalytic activity,nucleotide binding,protein binding,RNA binding		Protein kinase superfamily, STE Ser/Thr protein kinase family, STE20 subfamily	Protein kinase domain (1)
O94833-3		BPAEA_HUMAN	O94833-3	DST	Isoform 9 of Bullous pemphigoid antigen 1, isoforms 6/9/10	Homo sapiens		X	0		n.a	cyto	plas	cyto	membrane,cytoplasm,nucleus,cytosol,extracellular,cytoskeleton	regulation of biological process,cell differentiation,development,cell organization and biogenesis,transport	structural molecule activity,metal ion binding,protein binding	Cytoplasm > cytoskeleton.		Actin-binding domain (1); CH (calponin-homology) domains (2); EF-hand domains (2); GAR domain (1); LRR (leucine-rich) repeats (23); Plectin repeats (5); SH3 domain (1); Spectrin repeats (20)
O94875-6	SRBS2_HUMAN		O94875-6	SORBS2	Isoform 6 of Sorbin and SH3 domain-containing protein 2	Homo sapiens	X		0		_	nucl	nucl	cyto	cytoplasm,nucleus,cytoskeleton		structural molecule activity,metal ion binding,protein binding	Cytoplasm > perinuclear region.		SH3 domains (3); SoHo domain (1)
O94901-5	SUN1_HUMAN	UN84A_HUMAN	O94901-5	SUN1	Isoform 5 of SUN domain-containing protein 1	Homo sapiens	X	X	2		_	cyto	nucl	nucl	membrane,cytoplasm,nucleus	cell organization and biogenesis	protein binding	Nucleus inner membrane; Single-pass type II membrane protein.		SUN domain (1)
O94925-3	GLSK_HUMAN	GLSK_HUMAN	O94925-3	GLS	Isoform 3 of Glutaminase kidney isoform, mitochondrial	Homo sapiens	X	X	1		M	mito	cyto	mito	cytoplasm,mitochondrion,organelle lumen	regulation of biological process,metabolic process,response to stimulus,transport,cell communication	catalytic activity	Mitochondrion.	Glutaminase family	ANK repeat (1)
O94929-4		ABLM3_HUMAN	O94929-4	ABLIM3	Isoform 4 of Actin-binding LIM protein 3	Homo sapiens		X	0		_	nucl	cyto	cyto	cytoplasm	regulation of biological process,cell differentiation,development,cell organization and biogenesis,metabolic process,response to stimulus	metal ion binding,protein binding	Cytoplasm.		HP (headpiece) domain (1); LIM zinc-binding domains (4)
O95071		EDD1_HUMAN	O95071	UBR5	E3 ubiquitin-protein ligase UBR5	Homo sapiens		X	4		_	nucl	nucl	nucl	membrane,ribosome,endosome,cytoplasm,nucleus,cytosol,organelle lumen	cell differentiation,regulation of biological process,development,cell organization and biogenesis,metabolic process,cell proliferation,cell death,response to stimulus,transport,cell communication	catalytic activity,transcription regulator activity,structural molecule activity,metal ion binding,protein binding,RNA binding,transporter activity	Nucleus.		HECT (E6AP-type E3 ubiquitin-protein ligase) domain (1); PABC domain (1); UBR-type zinc finger (1)	Protein modification; protein ubiquitination.
O95197-5	RTN3_HUMAN		O95197-5	RTN3	Isoform 5 of Reticulon-3	Homo sapiens	X		3		_	plas	cyto	E.R.,golg	membrane,Golgi,cytoplasm,nucleus,endoplasmic reticulum,extracellular,organelle lumen	cell organization and biogenesis,cell death,response to stimulus,transport	protein binding	Endoplasmic reticulum membrane; Multi-pass membrane protein. Golgi apparatus membrane; Multi-pass membrane protein.		Reticulon domain (1)
O95232-2		CROP_HUMAN	O95232-2	LUC7L3	Isoform 2 of Luc7-like protein 3	Homo sapiens		X	0		_	nucl	nucl	nucl	membrane,nucleus,organelle lumen	metabolic process,cell death,response to stimulus	DNA binding,protein binding,RNA binding	Nucleus speckle.	Luc7 family
O95340-2		PAPS2_HUMAN	O95340-2	PAPSS2	Isoform B of Bifunctional 3'-phosphoadenosine 5'-phosphosulfate synthase 2	Homo sapiens		X	1		_	cyto_nucl	cyto	-	cytoplasm,cytosol	coagulation,development,metabolic process,response to stimulus	catalytic activity,nucleotide binding,protein binding		APS kinase family; Sulfate adenylyltransferase family		Sulfur metabolism; sulfate assimilation.
O95521		PRAM1_HUMAN	O95521	PRAMEF1	PRAME family member 1	Homo sapiens		X	2		_	cyto_nucl	-	-					PRAME family	LRR (leucine-rich) repeats (3)
O95563	BR44_HUMAN		O95563	BRP44	Brain protein 44	Homo sapiens	X		3		M	mito	plas	-	cytoplasm,extracellular,mitochondrion	coagulation,metabolic process,response to stimulus,transport	catalytic activity,metal ion binding,protein binding		UPF0041 (0-44) family
O95573	ACSL3_HUMAN	ACSL3_HUMAN	O95573	ACSL3	Long-chain-fatty-acid--CoA ligase 3	Homo sapiens	X	X	2		S	extr	cyto	mito,pero,E.R.,E.R.	membrane,cytoplasm,endoplasmic reticulum,cytosol,mitochondrion	defense response,regulation of biological process,cell differentiation,development,cell organization and biogenesis,metabolic process,response to stimulus	catalytic activity,nucleotide binding,metal ion binding,protein binding	Mitochondrion outer membrane; Single-pass type III membrane protein. Peroxisome membrane; Single-pass type III membrane protein. Microsome membrane; Single-pass type III membrane protein. Endoplasmic reticulum membrane; Single-pass type III membrane protein.	ATP-dependent AMP-binding enzyme family
O95782-2	AP2A1_HUMAN	AP2A1_HUMAN	O95782-2	AP2A1	Isoform B of AP-2 complex subunit alpha-1	Homo sapiens	X	X	2		_	cyto	cyto	plas,plas	membrane,Golgi,cytoplasm,cytosol	defense response,cell differentiation,regulation of biological process,development,cell organization and biogenesis,metabolic process,response to stimulus,transport,cell communication	structural molecule activity,protein binding,transporter activity	Cell membrane. Membrane > coated pit; Peripheral membrane protein; Cytoplasmic side.	Adaptor complexes large subunit family
O95793-2		STAU1_HUMAN	O95793-2	STAU1	Isoform Short of Double-stranded RNA-binding protein Staufen homolog 1	Homo sapiens		X	0		_	nucl	cyto	cyto,E.R.	cytoplasm,endoplasmic reticulum,cytoskeleton		protein binding,RNA binding,transporter activity	Cytoplasm. Rough endoplasmic reticulum.		DRBM (double-stranded RNA-binding) domains (3)
O95810	SDPR_HUMAN	SDPR_HUMAN	O95810	SDPR	Serum deprivation-response protein	Homo sapiens	X	X	0		_	cyto	plas	cyto,plas	membrane,cytoplasm,cytosol,extracellular	defense response,metabolic process,response to stimulus,transport	catalytic activity,protein binding	Cytoplasm > cytosol. Membrane > caveola.	PTRF/SDPR family
O95816		BAG2_HUMAN	O95816	BAG2	BAG family molecular chaperone regulator 2	Homo sapiens		X	0		M	cyto	cyto	-	membrane,cytoplasm,nucleus,cytosol,chromosome	regulation of biological process,cell differentiation,reproduction,metabolic process,cell death,response to stimulus	DNA binding,nucleotide binding,protein binding			BAG domain (1)
O95817	BAG3_HUMAN	BAG3_HUMAN	O95817	BAG3	BAG family molecular chaperone regulator 3	Homo sapiens	X	X	0		_	nucl	cyto	-	membrane,cytoplasm,cytosol	regulation of biological process,cell differentiation,metabolic process,cell death,response to stimulus,transport	catalytic activity,signal transducer activity,protein binding,transporter activity,receptor activity			BAG domain (1); WW domains (2)
O95819-5		M4K4_HUMAN	O95819-5	MAP4K4	Isoform 5 of Mitogen-activated protein kinase kinase kinase kinase 4	Homo sapiens		X	1		_	nucl	cyto	cyto	cytoplasm	regulation of biological process,metabolic process,response to stimulus,cell communication	catalytic activity,nucleotide binding,protein binding,enzyme regulator activity	Cytoplasm.	Protein kinase superfamily, STE Ser/Thr protein kinase family, STE20 subfamily	CNH domain (1); Protein kinase domain (1)
O96019-2		ACL6A_HUMAN	O96019-2	ACTL6A	Isoform 2 of Actin-like protein 6A	Homo sapiens		X	1		_	cyto	nucl	nucl	membrane,nucleus,organelle lumen,cytoskeleton	regulation of biological process,development,cell organization and biogenesis,cell growth,metabolic process,response to stimulus	catalytic activity,nucleotide binding,structural molecule activity,protein binding	Nucleus.	Actin family
P00367	DHE3_HUMAN		P00367	GLUD1	Glutamate dehydrogenase 1, mitochondrial	Homo sapiens	X		0		M	mito	cyto	mito	membrane,cytoplasm,extracellular,mitochondrion,organelle lumen	regulation of biological process,metabolic process,transport,cell communication	catalytic activity,nucleotide binding,metal ion binding,protein binding	Mitochondrion matrix.	Glu/Leu/Phe/Val dehydrogenases family
P00387-1		NCB5R_HUMAN	P00387-1	CYB5R3	NADH-cytochrome b5 reductase 3	Homo sapiens		X	1		S	extr	cyto	E.R.,mito,cyto	membrane,cytoplasm,cytosol,endoplasmic reticulum,extracellular,mitochondrion	metabolic process,transport	catalytic activity,nucleotide binding,metal ion binding	Endoplasmic reticulum membrane; Lipid-anchor; Cytoplasmic side. Mitochondrion outer membrane; Lipid-anchor; Cytoplasmic side. Cytoplasm.	Flavoprotein pyridine nucleotide cytochrome reductase family	FAD-binding FR-type domain (1)
P00387-2	NB5R3_HUMAN		P00387-2	CYB5R3	Isoform 2 of NADH-cytochrome b5 reductase 3	Homo sapiens	X		0		S	extr	cyto	E.R.,mito,cyto	membrane,cytoplasm,endoplasmic reticulum,cytosol,mitochondrion	metabolic process,transport	catalytic activity,nucleotide binding	Endoplasmic reticulum membrane; Lipid-anchor; Cytoplasmic side. Mitochondrion outer membrane; Lipid-anchor; Cytoplasmic side. Cytoplasm.	Flavoprotein pyridine nucleotide cytochrome reductase family	FAD-binding FR-type domain (1)
P00488	F13A_HUMAN		P00488	F13A1	Coagulation factor XIII A chain	Homo sapiens	X		1		_	cyto	extr	cyto,extr	membrane,cytoplasm,extracellular,organelle lumen	coagulation,reproduction,cell organization and biogenesis,metabolic process,response to stimulus,transport	catalytic activity,metal ion binding	Cytoplasm. Secreted.	Transglutaminase superfamily, Transglutaminase family
P00505	AATM_HUMAN		P00505	GOT2	Aspartate aminotransferase, mitochondrial	Homo sapiens	X		0	S	M	mito	cyto	mito,plas	membrane,cytoplasm,mitochondrion,organelle lumen	metabolic process,response to stimulus,transport	catalytic activity,protein binding	Mitochondrion matrix. Cell membrane.	Class-I pyridoxal-phosphate-dependent aminotransferase family
P00558	PGK1_HUMAN	PGK1_HUMAN	P00558	PGK1	Phosphoglycerate kinase 1	Homo sapiens	X	X	1		_	cyto	cyto	cyto	membrane,cytoplasm,cytosol,extracellular	defense response,regulation of biological process,metabolic process,response to stimulus	catalytic activity,DNA binding,nucleotide binding,metal ion binding,antioxidant activity,protein binding	Cytoplasm.	Phosphoglycerate kinase family		Carbohydrate degradation; glycolysis; pyruvate from D-glyceraldehyde 3-phosphate: step 2/5.
P01763		HV3B_HUMAN	P01763		Ig heavy chain V-III region WEA	Homo sapiens		X	0		_	cyto_nucl	-	-	extracellular	defense response,regulation of biological process,metabolic process,response to stimulus	protein binding			Ig-like (immunoglobulin-like) domain (1)
P02452	CO1A1_HUMAN	CO1A1_HUMAN	P02452	COL1A1	Collagen alpha-1(I) chain	Homo sapiens	X	X	0	S	S	extr	extr	extr	membrane,cytoplasm,extracellular	coagulation,regulation of biological process,cell differentiation,cellular component movement,development,cell organization and biogenesis,metabolic process,response to stimulus,transport,cell communication	transcription regulator activity,structural molecule activity,protein binding	Secreted > extracellular space > extracellular matrix.	Fibrillar collagen family	Fibrillar collagen NC1 domain (1); VWFC domain (1)
P02461-2		CO3A1_HUMAN	P02461-2	COL3A1	Isoform 2 of Collagen alpha-1(III) chain	Homo sapiens		X	1	S	S	extr	extr	extr	membrane,cytoplasm,extracellular	coagulation,regulation of biological process,cell differentiation,development,cell organization and biogenesis,metabolic process,response to stimulus,transport,cell communication	structural molecule activity,signal transducer activity,protein binding,receptor activity	Secreted > extracellular space > extracellular matrix.	Fibrillar collagen family	Fibrillar collagen NC1 domain (1); VWFC domain (1)
P02511	CRYAB_HUMAN	CRYAB_HUMAN	P02511	CRYAB	Alpha-crystallin B chain	Homo sapiens	X	X	0		_	mito	nucl	cyto,nucl	membrane,Golgi,cytoplasm,cytosol,nucleus,extracellular,mitochondrion,cell surface,cytoskeleton	cell differentiation,regulation of biological process,development,cell organization and biogenesis,cell growth,metabolic process,cell death,response to stimulus,transport,cell communication	structural molecule activity,protein binding	Cytoplasm. Nucleus.	Small heat shock protein (HSP20) family
P02545-3	LMNA_HUMAN	LMNA_HUMAN	P02545-3	LMNA	Isoform ADelta10 of Prelamin-A/C	Homo sapiens	X	X	1		M	nucl	nucl	nucl,nucl	membrane,cytoplasm,nucleus,organelle lumen,cytoskeleton	regulation of biological process,cell differentiation,reproduction,development,cell organization and biogenesis,cell death,response to stimulus,transport,cell communication	structural molecule activity,signal transducer activity,protein binding	Nucleus. Nucleus envelope.	Intermediate filament family
P02751-9	FINC_HUMAN	FINC_HUMAN	P02751-9	FN1	Isoform 9 of Fibronectin	Homo sapiens	X	X	0	S	S	extr	plas	extr	cytoplasm,extracellular,organelle lumen	defense response,coagulation,cell differentiation,cellular component movement,cell organization and biogenesis,metabolic process,response to stimulus,transport	catalytic activity,structural molecule activity,protein binding	Secreted > extracellular space > extracellular matrix.		Fibronectin type-I domains (12); Fibronectin type-II domains (2); Fibronectin type-III domains (16)
P02768-2		ALBU_HUMAN	P02768-2	ALB	Isoform 2 of Serum albumin	Homo sapiens		X	0	S	S	extr	extr	extr	cytoplasm,extracellular,organelle lumen	coagulation,regulation of biological process,metabolic process,cell death,response to stimulus,transport,cell communication	catalytic activity,DNA binding,metal ion binding,antioxidant activity,protein binding,transporter activity	Secreted.	ALB/AFP/VDB family	Albumin domains (3)
P02794		FRIH_HUMAN	P02794	FTH1	Ferritin heavy chain	Homo sapiens		X	0		_	cyto	cyto	-	membrane,cytoplasm,cytosol,mitochondrion	defense response,regulation of biological process,cellular component movement,cell organization and biogenesis,cellular homeostasis,metabolic process,cell proliferation,cell death,response to stimulus,transport	catalytic activity,DNA binding,nucleotide binding,metal ion binding,signal transducer activity,protein binding,transporter activity,receptor activity		Ferritin family	Ferritin-like diiron domain (1)
P04004		VTNC_HUMAN	P04004	VTN	Vitronectin	Homo sapiens		X	0	S	S	extr	extr	extr	membrane,ribosome,cytoplasm,cytosol,nucleus,endoplasmic reticulum,extracellular,organelle lumen,cell surface	defense response,coagulation,regulation of biological process,development,metabolic process,transport,cell communication,reproduction,cellular component movement,cell organization and biogenesis,cell proliferation,cell death,response to stimulus	catalytic activity,nucleotide binding,DNA binding,transcription regulator activity,structural molecule activity,signal transducer activity,metal ion binding,protein binding,enzyme regulator activity,receptor activity	Secreted > extracellular space.		Hemopexin-like domains (4); SMB (somatomedin-B) domain (1)
P04075	ALDOA_HUMAN	ALDOA_HUMAN	P04075	ALDOA	Fructose-bisphosphate aldolase A	Homo sapiens	X	X	0		_	cyto	cyto	-	cytoplasm,cytosol,nucleus,extracellular,organelle lumen,cytoskeleton	coagulation,regulation of biological process,cell organization and biogenesis,cellular homeostasis,metabolic process,response to stimulus,transport	catalytic activity,DNA binding,metal ion binding,protein binding,enzyme regulator activity,RNA binding		Class I fructose-bisphosphate aldolase family		Carbohydrate degradation; glycolysis; D-glyceraldehyde 3-phosphate and glycerone phosphate from D-glucose: step 4/4.
P04083	ANXA1_HUMAN	ANXA1_HUMAN	P04083	ANXA1	Annexin A1	Homo sapiens	X	X	0		_	cyto	plas	nucl,cyto,plas,plas	membrane,cytoplasm,nucleus,extracellular,cytoskeleton	defense response,coagulation,regulation of biological process,cell differentiation,development,metabolic process,transport,cell communication,cellular component movement,cell organization and biogenesis,cell proliferation,cell death,response to stimulus	catalytic activity,structural molecule activity,signal transducer activity,metal ion binding,protein binding,enzyme regulator activity	Nucleus. Cytoplasm. Cell projection > cilium. Basolateral cell membrane.	Annexin family	Annexin repeats (4)
P04181	OAT_HUMAN		P04181	OAT	Ornithine aminotransferase, mitochondrial	Homo sapiens	X		0		M	mito	cyto	mito	membrane,cytoplasm,extracellular,mitochondrion,organelle lumen	regulation of biological process,cell organization and biogenesis,metabolic process,response to stimulus,cell communication	catalytic activity,transcription regulator activity,signal transducer activity,metal ion binding,protein binding,RNA binding	Mitochondrion matrix.	Class-III pyridoxal-phosphate-dependent aminotransferase family		Amino-acid biosynthesis; L-proline biosynthesis; L-glutamate 5-semialdehyde from L-ornithine: step 1/1.
P04216	THY1_HUMAN	THY1_HUMAN	P04216	THY1	Thy-1 membrane glycoprotein	Homo sapiens	X	X	1	S	S	extr	plas	plas	membrane,cytoplasm,endoplasmic reticulum,cytosol,extracellular,cell surface	defense response,regulation of biological process,cell differentiation,development,cellular homeostasis,metabolic process,transport,cell communication,cellular component movement,cell organization and biogenesis,cell proliferation,cell death,response to stimulus	catalytic activity,signal transducer activity,protein binding,enzyme regulator activity	Cell membrane; Lipid-anchor > GPI-anchor.		Ig-like V-type (immunoglobulin-like) domain (1)
P04264		K2C1_HUMAN	P04264	KRT1	Keratin, type II cytoskeletal 1	Homo sapiens		X	1		M	nucl	cyto	plas	membrane,cytoplasm,cytoskeleton	defense response,coagulation,regulation of biological process,development,cell organization and biogenesis,metabolic process,response to stimulus	catalytic activity,structural molecule activity,signal transducer activity,protein binding,motor activity,receptor activity	Cell membrane.	Intermediate filament family
P04406	G3P_HUMAN	G3P_HUMAN	P04406	GAPDH	Glyceraldehyde-3-phosphate dehydrogenase	Homo sapiens	X	X	0		M	cyto	cyto	cyto,nucl,cyto,plas	membrane,cytoplasm,nucleus,cytosol	regulation of biological process,reproduction,metabolic process,cell death	catalytic activity,nucleotide binding,protein binding	Cytoplasm > cytosol. Nucleus. Cytoplasm > perinuclear region. Membrane.	Glyceraldehyde-3-phosphate dehydrogenase family		Carbohydrate degradation; glycolysis; pyruvate from D-glyceraldehyde 3-phosphate: step 1/5.
P04632	CPNS1_HUMAN		P04632	CAPNS1	Calpain small subunit 1	Homo sapiens	X		2		_	cyto	cyto	cyto,plas	membrane,cytoplasm,nucleus	cell differentiation,regulation of biological process,development,metabolic process,cell proliferation,response to stimulus	catalytic activity,metal ion binding,protein binding	Cytoplasm. Cell membrane.		EF-hand domains (5)
P04792	HSPB1_HUMAN	HSPB1_HUMAN	P04792	HSPB1	Heat shock protein beta-1	Homo sapiens	X	X	0		M	nucl	cyto	cyto,nucl,cyto	proteasome,membrane,cytoplasm,cytosol,nucleus,cell surface,cytoskeleton	cell differentiation,regulation of biological process,cellular component movement,cell organization and biogenesis,metabolic process,cell death,response to stimulus	catalytic activity,nucleotide binding,DNA binding,metal ion binding,protein binding,RNA binding	Cytoplasm. Nucleus. Cytoplasm > cytoskeleton > spindle.	Small heat shock protein (HSP20) family
P04843	RPN1_HUMAN		P04843	RPN1	Dolichyl-diphosphooligosaccharide--protein glycosyltransferase subunit 1	Homo sapiens	X		1	S	S	E.R.	cyto	E.R.,cyve	membrane,cytoplasm,endoplasmic reticulum,organelle lumen	metabolic process	catalytic activity,protein binding,RNA binding	Endoplasmic reticulum membrane; Single-pass type I membrane protein. Melanosome.	OST1 family
P04844	RPN2_HUMAN		P04844	RPN2	Dolichyl-diphosphooligosaccharide--protein glycosyltransferase subunit 2	Homo sapiens	X		4	S	S	extr	cyto	E.R.	membrane,cytoplasm,nucleus,endoplasmic reticulum,chromosome	regulation of biological process,cell organization and biogenesis,metabolic process,transport	catalytic activity,nucleotide binding,transcription regulator activity,DNA binding,metal ion binding,protein binding,RNA binding,transporter activity	Endoplasmic reticulum membrane; Multi-pass membrane protein.	SWP1 family
P04899-2	GNAI2_HUMAN	GNAI2_HUMAN	P04899-2	GNAI2	Isoform 2 of Guanine nucleotide-binding protein G(i) subunit alpha-2	Homo sapiens	X	X	1		_	plas	plas	-	membrane,cytoplasm,nucleus,cytosol	coagulation,regulation of biological process,metabolic process,cell proliferation,response to stimulus,transport,cell communication	catalytic activity,nucleotide binding,signal transducer activity,protein binding		G-alpha family, G(i/o/t/z) subfamily
P05023-2	AT1A1_HUMAN		P05023-2	ATP1A1	Isoform Short of Sodium/potassium-transporting ATPase subunit alpha-1	Homo sapiens	X		3		_	plas	plas	plas,cyve	membrane,cytoplasm	regulation of biological process,cellular component movement,cellular homeostasis,metabolic process,response to stimulus,transport	catalytic activity,nucleotide binding,metal ion binding,protein binding,transporter activity	Cell membrane; Multi-pass membrane protein. Melanosome.	Cation transport ATPase (P-type) (TC 3.A.3) family, Type IIC subfamily
P05121		PAI1_HUMAN	P05121	SERPINE1	Plasminogen activator inhibitor 1	Homo sapiens		X	1	S	S	extr	extr	extr	membrane,cytoplasm,extracellular,organelle lumen	defense response,coagulation,regulation of biological process,cellular component movement,development,cell organization and biogenesis,cell proliferation,metabolic process,cell death,response to stimulus,transport,cell communication	catalytic activity,signal transducer activity,metal ion binding,protein binding,enzyme regulator activity,receptor activity	Secreted.	Serpin family
P05141	ADT2_HUMAN		P05141	SLC25A5	ADP/ATP translocase 2	Homo sapiens	X		3		_	cyto	cyto	mito	membrane,cytoplasm,mitochondrion,organelle lumen,cytoskeleton	regulation of biological process,cell organization and biogenesis,metabolic process,transport,cell communication	protein binding,transporter activity	Mitochondrion inner membrane; Multi-pass membrane protein.	Mitochondrial carrier family	Solcar repeats (3)
P05186		PPBT_HUMAN	P05186	ALPL	Alkaline phosphatase, tissue-nonspecific isozyme	Homo sapiens		X	0	S	S	pero	plas	plas	membrane,cytoplasm,extracellular,vacuole	defense response,regulation of biological process,development,metabolic process,response to stimulus,transport	catalytic activity,metal ion binding	Cell membrane; Lipid-anchor > GPI-anchor.	Alkaline phosphatase family
P05198		IF2A_HUMAN	P05198	EIF2S1	Eukaryotic translation initiation factor 2 subunit 1	Homo sapiens		X	0		_	cyto	cyto	-	cytoplasm,nucleus,cytosol	regulation of biological process,cell differentiation,cell organization and biogenesis,metabolic process,response to stimulus	translation regulator activity,protein binding,enzyme regulator activity,RNA binding		EIF-2-alpha family	S1 motif domain (1)
P05204		HMGN2_HUMAN	P05204	HMGN2	Non-histone chromosomal protein HMG-17	Homo sapiens		X	0		_	nucl	nucl	nucl,cyto	cytoplasm,nucleus,chromosome	regulation of biological process,cell organization and biogenesis,metabolic process	DNA binding,protein binding	Nucleus. Cytoplasm.	HMGN family
P05386	RLA1_HUMAN	RLA1_HUMAN	P05386	RPLP1	60S acidic ribosomal protein P1	Homo sapiens	X	X	1		S	mito	cyto	-	ribosome,cytoplasm,cytosol	reproduction,development,cell organization and biogenesis,metabolic process	structural molecule activity,protein binding,RNA binding		Ribosomal protein L12P family
P05387	RLA2_HUMAN	RLA2_HUMAN	P05387	RPLP2	60S acidic ribosomal protein P2	Homo sapiens	X	X	0		_	mito	cyto	-	ribosome,cytoplasm,nucleus,cytosol,organelle lumen	defense response,regulation of biological process,reproduction,development,cell organization and biogenesis,metabolic process,response to stimulus	catalytic activity,nucleotide binding,structural molecule activity,metal ion binding,RNA binding		Ribosomal protein L12P family
P05388	RLA0_HUMAN	RLA0_HUMAN	P05388	RPLP0	60S acidic ribosomal protein P0	Homo sapiens	X	X	2		_	cyto_nucl	cyto	nucl,cyto	ribosome,cytoplasm,nucleus,cytosol	defense response,regulation of biological process,reproduction,development,cell organization and biogenesis,metabolic process,response to stimulus,transport	catalytic activity,transcription regulator activity,nucleotide binding,DNA binding,structural molecule activity,metal ion binding,protein binding,RNA binding	Nucleus. Cytoplasm.	Ribosomal protein L10P family
P05455	LA_HUMAN		P05455	SSB	Lupus La protein	Homo sapiens	X		0		_	cyto_nucl	nucl	nucl	membrane,cytoplasm,nucleus,organelle lumen	regulation of biological process,metabolic process,transport	nucleotide binding,DNA binding,protein binding,RNA binding,transporter activity	Nucleus.		HTH La-type RNA-binding domain (1); RRM (RNA recognition motif) domain (1)
P05556-5	ITB1_HUMAN		P05556-5	ITGB1	Isoform Beta-1D of Integrin beta-1	Homo sapiens	X		1	S	S	extr	plas	plas,cyve,cyto	membrane,cytoplasm,endoplasmic reticulum,cell surface	defense response,coagulation,regulation of biological process,cell differentiation,reproduction,cellular component movement,development,cell organization and biogenesis,cell proliferation,cell death,response to stimulus,cell communication	signal transducer activity,protein binding,receptor activity	Cell membrane; Single-pass type I membrane protein. Melanosome. Cleavage furrow.	Integrin beta chain family	VWFA domain (1)
P05976-1		MLE1_HUMAN	P05976-1	MYL1	Myosin light chain 1/3, skeletal muscle isoform	Homo sapiens		X	0		_	cyto	cyto	-	membrane,cytoplasm,nucleus,cytosol,organelle lumen,cytoskeleton	regulation of biological process,cellular component movement,development,metabolic process,response to stimulus,transport	catalytic activity,nucleotide binding,structural molecule activity,signal transducer activity,metal ion binding,protein binding,transporter activity,motor activity			EF-hand domains (3)
P05976-2	MYL1_HUMAN		P05976-2	MYL1	Isoform MLC3 of Myosin light chain 1/3, skeletal muscle isoform	Homo sapiens	X		0		_	cyto	cyto	-	cytoplasm,cytosol,cytoskeleton	development,transport	catalytic activity,structural molecule activity,metal ion binding,motor activity			EF-hand domains (3)
P05997		CO5A2_HUMAN	P05997	COL5A2	Collagen alpha-2(V) chain	Homo sapiens		X	0	S	S	extr	extr	extr	membrane,cytoplasm,extracellular	regulation of biological process,cell differentiation,development,cell organization and biogenesis,cell proliferation,metabolic process,response to stimulus,transport	catalytic activity,nucleotide binding,structural molecule activity,signal transducer activity,protein binding	Secreted > extracellular space > extracellular matrix.	Fibrillar collagen family	Fibrillar collagen NC1 domain (1); VWFC domain (1)
P06396-2	GELS_HUMAN	GELS_HUMAN	P06396-2	GSN	Isoform 2 of Gelsolin	Homo sapiens	X	X	0		S	E.R.	extr	cyto,extr	cytoplasm,cytosol,extracellular,cytoskeleton	cell differentiation,regulation of biological process,development,cell organization and biogenesis,cell death,response to stimulus,transport	structural molecule activity,metal ion binding,protein binding	Cytoplasm > cytoskeleton. Secreted.	Villin/gelsolin family	Gelsolin-like repeats (6)
P06576	ATPB_HUMAN	ATPB_HUMAN	P06576	ATP5B	ATP synthase subunit beta, mitochondrial	Homo sapiens	X	X	2		M	mito	cyto	mito,mito	membrane,cytoplasm,cytosol,mitochondrion,organelle lumen,cell surface	regulation of biological process,cellular component movement,development,cell organization and biogenesis,cellular homeostasis,metabolic process,cell proliferation,response to stimulus,transport	catalytic activity,nucleotide binding,structural molecule activity,metal ion binding,signal transducer activity,protein binding,transporter activity,receptor activity	Mitochondrion. Mitochondrion inner membrane.	ATPase alpha/beta chains family
P06733-2	ENOA_HUMAN	ENOA_HUMAN	P06733-2	ENO1	Isoform MBP-1 of Alpha-enolase	Homo sapiens	X	X	1		_	cyto	cyto	cyto,plas,cyto,nucl	membrane,cytoplasm,cytosol,nucleus	regulation of biological process,cell organization and biogenesis,cell growth,metabolic process,response to stimulus	catalytic activity,DNA binding,transcription regulator activity,metal ion binding,protein binding	Cytoplasm. Cell membrane. Cytoplasm > myofibril > sarcomere > M-band. Nucleus.	Enolase family		Carbohydrate degradation; glycolysis; pyruvate from D-glyceraldehyde 3-phosphate: step 4/5.
P06748-2	NPM_HUMAN	NPM_HUMAN	P06748-2	NPM1	Isoform 2 of Nucleophosmin	Homo sapiens	X	X	0		_	nucl	nucl	nucl,nucl	ribosome,cytoplasm,nucleus,cytosol,organelle lumen,cytoskeleton	regulation of biological process,cell organization and biogenesis,cell growth,cellular homeostasis,cell proliferation,metabolic process,cell death,response to stimulus,transport,cell communication	transcription regulator activity,protein binding,RNA binding	Nucleus > nucleolus. Nucleus > nucleoplasm.	Nucleoplasmin family
P06753-3	TPM3_HUMAN		P06753-3	TPM3	Isoform 3 of Tropomyosin alpha-3 chain	Homo sapiens	X		0		_	cyto	cyto	cyto	cytoplasm,nucleus,cytosol,cytoskeleton	regulation of biological process,cellular component movement,development,transport,cell communication	structural molecule activity,protein binding	Cytoplasm > cytoskeleton.	Tropomyosin family
P07099	HYEP_HUMAN		P07099	EPHX1	Epoxide hydrolase 1	Homo sapiens	X		2		S	extr	cyto	E.R.,E.R.	membrane,cytoplasm,nucleus,endoplasmic reticulum,extracellular	regulation of biological process,metabolic process,response to stimulus	catalytic activity,DNA binding,transcription regulator activity	Microsome membrane; Single-pass type II membrane protein. Endoplasmic reticulum membrane; Single-pass type II membrane protein.	Peptidase S33 family
P07195	LDHB_HUMAN		P07195	LDHB	L-lactate dehydrogenase B chain	Homo sapiens	X		1		_	cyto	cyto	cyto	cytoplasm,cytosol,nucleus,extracellular,mitochondrion	development,metabolic process,response to stimulus,transport,cell communication	catalytic activity,nucleotide binding,transcription regulator activity,metal ion binding,protein binding,enzyme regulator activity,transporter activity	Cytoplasm.	LDH/MDH superfamily, LDH family		Fermentation; pyruvate fermentation to lactate; (S)-lactate from pyruvate: step 1/1.
P07237	PDIA1_HUMAN	PDIA1_HUMAN	P07237	P4HB	Protein disulfide-isomerase	Homo sapiens	X	X	0	S	S	extr	cyto	E.R.,cyve,plas	membrane,cytoplasm,nucleus,endoplasmic reticulum,cytosol,extracellular,organelle lumen,cell surface,chromosome	regulation of biological process,cell organization and biogenesis,cellular homeostasis,metabolic process,response to stimulus	catalytic activity,DNA binding,metal ion binding,protein binding,enzyme regulator activity	Endoplasmic reticulum lumen. Melanosome. Cell membrane; Peripheral membrane protein.	Protein disulfide isomerase family	Thioredoxin domains (2)
P07339	CATD_HUMAN	CATD_HUMAN	P07339	CTSD	Cathepsin D	Homo sapiens	X	X	0	S	S	extr	cyto	lyso,cyve	membrane,Golgi,cytoplasm,endoplasmic reticulum,extracellular,vacuole,mitochondrion,cytoskeleton	regulation of biological process,reproduction,cell organization and biogenesis,metabolic process,cell death,response to stimulus,cell communication	catalytic activity,metal ion binding,antioxidant activity,protein binding	Lysosome. Melanosome.	Peptidase A1 family
P07355-2	ANXA2_HUMAN	ANXA2_HUMAN	P07355-2	ANXA2	Isoform 2 of Annexin A2	Homo sapiens	X	X	0		_	cyto	plas	extr,cyve	membrane,endosome,cytoplasm,extracellular	coagulation,regulation of biological process,development,cell organization and biogenesis,response to stimulus,transport	metal ion binding,protein binding,enzyme regulator activity	Secreted > extracellular space > extracellular matrix > basement membrane. Melanosome.	Annexin family	Annexin repeats (4)
P07437	TBB5_HUMAN	TBB2_HUMAN	P07437	TUBB	Tubulin beta chain	Homo sapiens	X	X	0		_	cyto_nucl	cyto	cyto	membrane,cytoplasm,cytosol,cytoskeleton	defense response,regulation of biological process,cell differentiation,cell division,cellular component movement,development,cell organization and biogenesis,metabolic process,cell death,response to stimulus,transport	catalytic activity,nucleotide binding,structural molecule activity,signal transducer activity,protein binding	Cytoplasm > cytoskeleton.	Tubulin family
P07602-3	SAP_HUMAN		P07602-3	PSAP	Isoform Sap-mu-9 of Proactivator polypeptide	Homo sapiens	X		0	S	S	plas	extr	lyso	membrane,Golgi,cytoplasm,extracellular,vacuole,mitochondrion,organelle lumen	coagulation,cell differentiation,regulation of biological process,reproduction,development,cell organization and biogenesis,metabolic process,response to stimulus,transport,cell communication	catalytic activity,enzyme regulator activity	Lysosome.		Saposin A-type domains (2); Saposin B-type domains (4)
P07737		PROF1_HUMAN	P07737	PFN1	Profilin-1	Homo sapiens		X	0		_	cyto	cyto	cyto	membrane,cytoplasm,nucleus,extracellular,vacuole,mitochondrion,organelle lumen,cytoskeleton	coagulation,regulation of biological process,cell division,cell differentiation,cellular component movement,development,cell organization and biogenesis,metabolic process,cell death,response to stimulus,transport	catalytic activity,nucleotide binding,structural molecule activity,metal ion binding,protein binding	Cytoplasm > cytoskeleton.	Profilin family
P07858	CATB_HUMAN		P07858	CTSB	Cathepsin B	Homo sapiens	X		0	S	S	extr	cyto	lyso,cyve	membrane,cytoplasm,nucleus,extracellular,vacuole,mitochondrion,organelle lumen,cell surface,cytoskeleton	regulation of biological process,cell differentiation,development,metabolic process,cell death,response to stimulus	catalytic activity,structural molecule activity,metal ion binding,antioxidant activity,protein binding,enzyme regulator activity	Lysosome. Melanosome.	Peptidase C1 family
P07900-2	HS90A_HUMAN	HS90A_HUMAN	P07900-2	HSP90AA1	Isoform 2 of Heat shock protein HSP 90-alpha	Homo sapiens	X	X	2		_	cyto	cyto	cyto,cyve	membrane,cytoplasm,cytosol	regulation of biological process,cell differentiation,development,cell organization and biogenesis,metabolic process,response to stimulus,transport,cell communication	nucleotide binding,protein binding,enzyme regulator activity	Cytoplasm. Melanosome.	Heat shock protein 90 family
P07910-4	HNRPC_HUMAN	HNRPC_HUMAN	P07910-4	HNRNPC	Isoform 4 of Heterogeneous nuclear ribonucleoproteins C1/C2	Homo sapiens	X	X	0		_	mito	nucl	nucl	spliceosomal complex,nucleus,organelle lumen	metabolic process	nucleotide binding,protein binding,RNA binding	Nucleus.	RRM HNRPC family, RALY subfamily	RRM (RNA recognition motif) domain (1)
P07951-3	TPM2_HUMAN	TPM2_HUMAN	P07951-3	TPM2	Isoform 3 of Tropomyosin beta chain	Homo sapiens	X	X	0		_	cyto	cyto	cyto	cytoplasm,cytosol,cytoskeleton	regulation of biological process,metabolic process,transport,cell communication	structural molecule activity,protein binding	Cytoplasm > cytoskeleton.	Tropomyosin family
P07954-2	FUMH_HUMAN		P07954-2	FH	Isoform Cytoplasmic of Fumarate hydratase, mitochondrial	Homo sapiens	X		0		M	mito	cyto	mito,cyto	membrane,cytoplasm,mitochondrion,organelle lumen	regulation of biological process,metabolic process	catalytic activity	Mitochondrion. Cytoplasm.	Class-II fumarase/aspartase family, Fumarase subfamily		Carbohydrate metabolism; tricarboxylic acid cycle; (S)-malate from fumarate: step 1/1.
P07996	TSP1_HUMAN	TSP1_HUMAN	P07996	THBS1	Thrombospondin-1	Homo sapiens	X	X	0	S	S	extr	extr	-	membrane,cytoplasm,nucleus,extracellular,organelle lumen,cell surface,cytoskeleton	defense response,coagulation,regulation of biological process,cellular component movement,development,cell organization and biogenesis,cell proliferation,metabolic process,cell death,response to stimulus,transport,cell communication	DNA binding,structural molecule activity,signal transducer activity,metal ion binding,protein binding,enzyme regulator activity,RNA binding		Thrombospondin family	EGF-like domains (3); TSP C-terminal (TSPC) domain (1); TSP N-terminal (TSPN) domain (1); TSP type-1 domains (3); TSP type-3 repeats (8); VWFC domain (1)
P08107		HSP71_HUMAN	P08107	HSPA1B	Heat shock 70 kDa protein 1A/1B	Homo sapiens		X	0		_	cyto	cyto	cyto	proteasome,cytoplasm,endoplasmic reticulum,nucleus,cytosol,mitochondrion,organelle lumen	regulation of biological process,cell differentiation,cell organization and biogenesis,cell growth,cell proliferation,metabolic process,cell death,response to stimulus	catalytic activity,nucleotide binding,DNA binding,metal ion binding,protein binding,enzyme regulator activity,RNA binding	Cytoplasm.	Heat shock protein 70 family
P08123	CO1A2_HUMAN	CO1A2_HUMAN	P08123	COL1A2	Collagen alpha-2(I) chain	Homo sapiens	X	X	0	S	S	extr	extr	extr	membrane,cytoplasm,extracellular	coagulation,cell differentiation,regulation of biological process,cellular component movement,development,cell organization and biogenesis,response to stimulus,transport,cell communication	structural molecule activity,protein binding	Secreted > extracellular space > extracellular matrix.	Fibrillar collagen family	Fibrillar collagen NC1 domain (1)
P08133	ANXA6_HUMAN	ANXA6_HUMAN	P08133	ANXA6	Annexin A6	Homo sapiens	X	X	0		_	cyto	plas	cyto,cyve	membrane,cytoplasm	coagulation,regulation of biological process,cell organization and biogenesis,cell death,response to stimulus,transport	catalytic activity,metal ion binding,protein binding,enzyme regulator activity	Cytoplasm. Melanosome.	Annexin family	Annexin repeats (8)
P08134	RHOC_HUMAN		P08134	RHOC	Rho-related GTP-binding protein RhoC	Homo sapiens	X		0		_	cyto	plas	plas	membrane,Golgi,cytoplasm,cytosol,nucleus	regulation of biological process,cell differentiation,development,cellular component movement,cell organization and biogenesis,cell growth,metabolic process,cell death,response to stimulus,transport,cell communication	catalytic activity,nucleotide binding,signal transducer activity,protein binding	Cell membrane; Lipid-anchor; Cytoplasmic side.	Small GTPase superfamily, Rho family
P08138	TNR16_HUMAN		P08138	NGFR	Tumor necrosis factor receptor superfamily member 16	Homo sapiens	X		1	S	S	extr	plas	plas	membrane,endosome,cytoplasm,nucleus,cytosol,extracellular,organelle lumen,cell surface,cytoskeleton	coagulation,cell differentiation,regulation of biological process,development,cellular homeostasis,metabolic process,transport,cell communication,cell division,cellular component movement,cell organization and biogenesis,cell proliferation,cell death,response to stimulus	catalytic activity,signal transducer activity,metal ion binding,protein binding,receptor activity	Membrane; Single-pass type I membrane protein.		Death domain (1); TNFR-Cys repeats (4)
P08195-4	4F2_HUMAN		P08195-4	SLC3A2	Isoform 4 of 4F2 cell-surface antigen heavy chain	Homo sapiens	X		2		_	E.R.	plas	plas,cyve	membrane,cytoplasm,cell surface	coagulation,regulation of biological process,cellular component movement,development,cell organization and biogenesis,cell growth,metabolic process,response to stimulus,transport	catalytic activity,nucleotide binding,protein binding,transporter activity	Apical cell membrane; Single-pass type II membrane protein. Melanosome.	SLC3A transporter family
P08238	HS90B_HUMAN	HS90B_HUMAN	P08238	HSP90AB1	Heat shock protein HSP 90-beta	Homo sapiens	X	X	3		_	cyto	cyto	cyto,cyve	cytoplasm,nucleus,cytosol,mitochondrion	cell differentiation,regulation of biological process,development,cell organization and biogenesis,metabolic process,response to stimulus,cell communication	nucleotide binding,DNA binding,signal transducer activity,protein binding,enzyme regulator activity,receptor activity	Cytoplasm. Melanosome.	Heat shock protein 90 family
P08559	ODPA_HUMAN		P08559	PDHA1	Pyruvate dehydrogenase E1 component subunit alpha, somatic form, mitochondrial	Homo sapiens	X		0		M	mito	cyto	mito	membrane,cytoplasm,nucleus,extracellular,mitochondrion,organelle lumen	defense response,regulation of biological process,development,metabolic process,response to stimulus,transport	catalytic activity,transcription regulator activity,DNA binding,structural molecule activity,protein binding,transporter activity	Mitochondrion matrix.
P08621-4		RU17_HUMAN	P08621-4	SNRNP70	Isoform 4 of U1 small nuclear ribonucleoprotein 70 kDa	Homo sapiens		X	0	S	_	nucl	nucl	nucl	spliceosomal complex,nucleus,organelle lumen	regulation of biological process,cell differentiation,development,metabolic process	nucleotide binding,protein binding,RNA binding	Nucleus.		RRM (RNA recognition motif) domain (1)
P08670	VIME_HUMAN	VIME_HUMAN	P08670	VIM	Vimentin	Homo sapiens	X	X	0		M	nucl	cyto	-	membrane,cytoplasm,cytosol,extracellular,cytoskeleton	defense response,regulation of biological process,reproduction,cellular component movement,cell organization and biogenesis,metabolic process,cell death,response to stimulus,transport	catalytic activity,DNA binding,structural molecule activity,protein binding,transporter activity,motor activity		Intermediate filament family
P08758	ANXA5_HUMAN		P08758	ANXA5	Annexin A5	Homo sapiens	X		0		_	cyto	plas	-	membrane,cytoplasm,extracellular	coagulation,regulation of biological process,cell differentiation,cell organization and biogenesis,cell death,response to stimulus,cell communication	metal ion binding,protein binding,enzyme regulator activity		Annexin family	Annexin repeats (4)
P08865	RSSA_HUMAN	RSSA_HUMAN	P08865	RPSA	40S ribosomal protein SA	Homo sapiens	X	X	0		_	cyto	plas	plas,cyto,nucl	membrane,ribosome,cytoplasm,nucleus,cytosol	regulation of biological process,reproduction,development,cell organization and biogenesis,metabolic process,transport,cell communication	catalytic activity,structural molecule activity,signal transducer activity,protein binding,RNA binding,receptor activity	Cell membrane. Cytoplasm. Nucleus.	Ribosomal protein S2P family
P09012	SNRPA_HUMAN	SNRPA_HUMAN	P09012	SNRPA	U1 small nuclear ribonucleoprotein A	Homo sapiens	X	X	0		_	nucl	nucl	nucl	spliceosomal complex,membrane,endosome,cytoplasm,nucleus,cytosol,extracellular,organelle lumen,cytoskeleton,chromosome	regulation of biological process,cell division,cell differentiation,development,cell organization and biogenesis,metabolic process,response to stimulus,transport,cell communication	catalytic activity,nucleotide binding,metal ion binding,signal transducer activity,protein binding,enzyme regulator activity,RNA binding,receptor activity	Nucleus.	RRM U1 A/B'' family	RRM (RNA recognition motif) domains (2)
P09234	RU1C_HUMAN	RU1C_HUMAN	P09234	SNRPC	U1 small nuclear ribonucleoprotein C	Homo sapiens	X	X	0		_	nucl	nucl	nucl	spliceosomal complex,cytoplasm,nucleus,cytosol,organelle lumen	cell organization and biogenesis,metabolic process	nucleotide binding,metal ion binding,protein binding,RNA binding	Nucleus.	U1 small nuclear ribonucleoprotein C family	Matrin-type zinc finger (1)
P09382	LEG1_HUMAN	LEG1_HUMAN	P09382	LGALS1	Galectin-1	Homo sapiens	X	X	0		_	extr	extr	extr	membrane,cytoplasm,endoplasmic reticulum,nucleus,cytosol,extracellular,mitochondrion,cell surface	defense response,cell differentiation,regulation of biological process,development,cell organization and biogenesis,metabolic process,cell death,response to stimulus,cell communication	catalytic activity,signal transducer activity,metal ion binding,protein binding	Secreted > extracellular space > extracellular matrix.		Galectin domain (1)
P09486	SPRC_HUMAN	SPRC_HUMAN	P09486	SPARC	SPARC	Homo sapiens	X	X	0	S	S	extr	extr	extr	cytoplasm,extracellular,organelle lumen	coagulation,regulation of biological process,development,cell proliferation,response to stimulus,transport,cell communication	metal ion binding,protein binding	Secreted > extracellular space > extracellular matrix > basement membrane.	SPARC family	EF-hand domain (1); Follistatin-like domain (1); Kazal-like domain (1)
P09493-6	TPM1_HUMAN	TPM1_HUMAN	P09493-6	TPM1	Isoform 6 of Tropomyosin alpha-1 chain	Homo sapiens	X	X	0		_	cyto	cyto	cyto	membrane,cytoplasm,nucleus,cytosol,cytoskeleton	cell differentiation,regulation of biological process,development,cellular component movement,cell organization and biogenesis,metabolic process,response to stimulus,transport	structural molecule activity,protein binding	Cytoplasm > cytoskeleton.	Tropomyosin family
P09497-2	CLCB_HUMAN		P09497-2	CLTB	Isoform Non-brain of Clathrin light chain B	Homo sapiens	X		0		_	cyto	plas	cyve,plas	membrane,Golgi,cytoplasm	cell organization and biogenesis,metabolic process,transport	structural molecule activity,metal ion binding,protein binding,transporter activity	Cytoplasmic vesicle membrane; Peripheral membrane protein; Cytoplasmic side. Membrane > coated pit; Peripheral membrane protein; Cytoplasmic side.
P09622	DLDH_HUMAN		P09622	DLD	Dihydrolipoyl dehydrogenase, mitochondrial	Homo sapiens	X		1		M	mito	cyto	mito	cytoplasm,mitochondrion,vacuole,organelle lumen	regulation of biological process,cell differentiation,reproduction,development,cellular homeostasis,metabolic process	catalytic activity,nucleotide binding,protein binding	Mitochondrion matrix.	Class-I pyridine nucleotide-disulfide oxidoreductase family
P09651-3	ROA1_HUMAN	ROA1_HUMAN	P09651-3	HNRNPA1	Isoform 2 of Heterogeneous nuclear ribonucleoprotein A1	Homo sapiens	X	X	0		_	nucl	nucl	nucl,cyto	spliceosomal complex,cytoplasm,nucleus,organelle lumen	metabolic process,transport	nucleotide binding,DNA binding,protein binding,RNA binding	Nucleus. Cytoplasm.		RRM (RNA recognition motif) domains (2)
P09874		PARP1_HUMAN	P09874	PARP1	Poly [ADP-ribose] polymerase 1	Homo sapiens		X	0		_	nucl	nucl	nucl	membrane,cytoplasm,nucleus,extracellular,organelle lumen	defense response,regulation of biological process,cell organization and biogenesis,metabolic process,response to stimulus	catalytic activity,DNA binding,nucleotide binding,metal ion binding,protein binding,RNA binding	Nucleus.		BRCT domain (1); PARP alpha-helical domain (1); PARP catalytic domain (1); PARP-type zinc fingers (2)
P09936	UCHL1_HUMAN	UCHL1_HUMAN	P09936	UCHL1	Ubiquitin carboxyl-terminal hydrolase isozyme L1	Homo sapiens	X	X	0	S	_	cyto	cyto	cyto	membrane,cytoplasm,nucleus,cytosol,organelle lumen	cell differentiation,regulation of biological process,development,cell organization and biogenesis,cell proliferation,metabolic process,response to stimulus,transport,cell communication	catalytic activity,protein binding	Cytoplasm.	Peptidase C12 family
P0C024		NUDT7_HUMAN	P0C024	NUDT7	Peroxisomal coenzyme A diphosphatase NUDT7	Homo sapiens		X	1		_	plas	cyto	pero	cytoplasm,extracellular	cell differentiation,metabolic process	catalytic activity,metal ion binding	Peroxisome.	Nudix hydrolase family, PCD1 subfamily	Nudix hydrolase domain (1)
P10275-2		ANDR_HUMAN	P10275-2	AR	Isoform 2 of Androgen receptor	Homo sapiens		X	2		M	nucl	nucl	nucl	cytoplasm,nucleus,organelle lumen	regulation of biological process,cell differentiation,reproduction,development,cell organization and biogenesis,cell growth,metabolic process,cell proliferation,cell death,response to stimulus,transport,cell communication	transcription regulator activity,DNA binding,metal ion binding,signal transducer activity,protein binding,receptor activity	Nucleus.	Nuclear hormone receptor family, NR3 subfamily	Nuclear receptor DNA-binding domain (1)
P10301	RRAS_HUMAN		P10301	RRAS	Ras-related protein R-Ras	Homo sapiens	X		0		_	nucl	cyto	plas	membrane	regulation of biological process,cell differentiation,cellular component movement,development,cell organization and biogenesis,metabolic process,response to stimulus,transport,cell communication	catalytic activity,nucleotide binding,protein binding	Cell membrane; Lipid-anchor; Cytoplasmic side.	Small GTPase superfamily, Ras family
P10314	1A32_HUMAN		P10314	LOC100507680	HLA class I histocompatibility antigen, A-32 alpha chain	Homo sapiens	X		1	S	S	extr	plas	plas	membrane,Golgi,endosome,cytoplasm	response to stimulus	signal transducer activity,protein binding,receptor activity	Membrane; Single-pass type I membrane protein.	MHC class I family	Ig-like C1-type (immunoglobulin-like) domain (1)
P10620	MGST1_HUMAN		P10620	MGST1	Microsomal glutathione S-transferase 1	Homo sapiens	X		3		_	cyto_nucl	cyto	E.R.,mito,E.R.	membrane,cytoplasm,nucleus,endoplasmic reticulum,mitochondrion	cell differentiation,reproduction,development,metabolic process,response to stimulus	catalytic activity,protein binding	Microsome. Mitochondrion outer membrane; Peripheral membrane protein. Endoplasmic reticulum membrane; Multi-pass membrane protein.	MAPEG family
P10809	CH60_HUMAN		P10809	HSPD1	60 kDa heat shock protein, mitochondrial	Homo sapiens	X		2		M	mito	cyto	mito	membrane,endosome,cytoplasm,nucleus,cytosol,extracellular,mitochondrion,organelle lumen,cell surface	defense response,regulation of biological process,cell differentiation,development,cell organization and biogenesis,cell proliferation,metabolic process,cell death,response to stimulus,transport	catalytic activity,nucleotide binding,DNA binding,protein binding	Mitochondrion matrix.	Chaperonin (HSP60) family
P11021	GRP78_HUMAN	GRP78_HUMAN	P11021	HSPA5	78 kDa glucose-regulated protein	Homo sapiens	X	X	0	S	S	E.R.	cyto	E.R.,cyve	membrane,cytoplasm,cytosol,nucleus,endoplasmic reticulum,organelle lumen,cell surface	coagulation,cell differentiation,regulation of biological process,development,cell organization and biogenesis,metabolic process,cell death,response to stimulus,transport,cell communication	catalytic activity,nucleotide binding,signal transducer activity,metal ion binding,protein binding,enzyme regulator activity,receptor activity	Endoplasmic reticulum lumen. Melanosome.	Heat shock protein 70 family
P11047		LAMC1_HUMAN	P11047	LAMC1	Laminin subunit gamma-1	Homo sapiens		X	0	S	S	extr	extr	extr	membrane,cytoplasm,endoplasmic reticulum,nucleus,extracellular,chromosome,cytoskeleton	regulation of biological process,cell differentiation,cellular component movement,development,cell organization and biogenesis,cell proliferation,metabolic process,response to stimulus,transport,cell communication	catalytic activity,nucleotide binding,structural molecule activity,signal transducer activity,metal ion binding,protein binding,motor activity,transporter activity	Secreted > extracellular space > extracellular matrix > basement membrane.		Laminin EGF-like domains (11); Laminin IV type A domain (1); Laminin N-terminal domain (1)
P11055	MYH3_HUMAN	MYH3_HUMAN	P11055	MYH3	Myosin-3	Homo sapiens	X	X	0		_	cyto	cyto	cyto	membrane,cytoplasm,nucleus,cytosol,cytoskeleton	cell differentiation,development,cell organization and biogenesis,metabolic process,transport	catalytic activity,nucleotide binding,structural molecule activity,protein binding,motor activity,transporter activity	Cytoplasm > myofibril.		IQ domain (1); Myosin head-like domain (1)
P11142-2	HSP7C_HUMAN	HSP7C_HUMAN	P11142-2	HSPA8	Isoform 2 of Heat shock cognate 71 kDa protein	Homo sapiens	X	X	0		_	cyto	cyto	cyto,cyve	membrane,cytoplasm,nucleus,cytosol,cell surface	regulation of biological process,cell organization and biogenesis,metabolic process,response to stimulus,transport,cell communication	catalytic activity,nucleotide binding,protein binding	Cytoplasm. Melanosome.	Heat shock protein 70 family
P11177-2	ODPB_HUMAN		P11177-2	PDHB	Isoform 2 of Pyruvate dehydrogenase E1 component subunit beta, mitochondrial	Homo sapiens	X		1		M	mito	cyto	mito	cytoplasm,mitochondrion,organelle lumen	regulation of biological process,metabolic process	catalytic activity	Mitochondrion matrix.
P11387		TOP1_HUMAN	P11387	TOP1	DNA topoisomerase 1	Homo sapiens		X	0		_	nucl	nucl	nucl,nucl	membrane,cytoplasm,nucleus,mitochondrion,organelle lumen,chromosome,cytoskeleton	defense response,cell differentiation,regulation of biological process,cell division,development,metabolic process,cell death,response to stimulus,transport	catalytic activity,DNA binding,nucleotide binding,signal transducer activity,metal ion binding,protein binding,transporter activity,receptor activity	Nucleus > nucleolus. Nucleus > nucleoplasm.	Eukaryotic type I topoisomerase family
P11586		C1TC_HUMAN	P11586	MTHFD1	C-1-tetrahydrofolate synthase, cytoplasmic	Homo sapiens		X	3		_	cyto	cyto	cyto	membrane,cytoplasm,cytosol,extracellular,mitochondrion	regulation of biological process,metabolic process,transport,cell communication	catalytic activity,nucleotide binding,metal ion binding,protein binding	Cytoplasm.	Tetrahydrofolate dehydrogenase/cyclohydrolase family; Formate--tetrahydrofolate ligase family		One-carbon metabolism; tetrahydrofolate interconversion.
P11717	MPRI_HUMAN		P11717	IGF2R	Cation-independent mannose-6-phosphate receptor	Homo sapiens	X		2	S	M	plas	plas	lyso	membrane,Golgi,endosome,cytoplasm,nucleus,extracellular,vacuole,organelle lumen,cell surface	regulation of biological process,reproduction,development,cell organization and biogenesis,cell death,response to stimulus,transport,cell communication	catalytic activity,signal transducer activity,protein binding,transporter activity,receptor activity	Lysosome membrane; Single-pass type I membrane protein.	MRL1/IGF2R family	Fibronectin type-II domain (1)
P11940-2	PABP1_HUMAN	PABP1_HUMAN	P11940-2	PABPC1	Isoform 2 of Polyadenylate-binding protein 1	Homo sapiens	X	X	0		_	cyto_nucl	cyto	cyto,nucl	spliceosomal complex,cytoplasm,cytosol,nucleus	regulation of biological process,metabolic process	translation regulator activity,nucleotide binding,protein binding,RNA binding	Cytoplasm. Nucleus.	Polyadenylate-binding protein type-1 family	PABC domain (1); RRM (RNA recognition motif) domains (4)
P12107-3	COBA1_HUMAN	COBA1_HUMAN	P12107-3	COL11A1	Isoform C of Collagen alpha-1(XI) chain	Homo sapiens	X	X	0	S	S	mito	extr	extr	cytoplasm,extracellular	development,cell organization and biogenesis,metabolic process,response to stimulus,transport	structural molecule activity,protein binding	Secreted > extracellular space > extracellular matrix.	Fibrillar collagen family	Fibrillar collagen NC1 domain (1); TSP N-terminal (TSPN) domain (1)
P12109	CO6A1_HUMAN	CO6A1_HUMAN	P12109	COL6A1	Collagen alpha-1(VI) chain	Homo sapiens	X	X	0	S	S	mito	extr	extr	membrane,cytoplasm,extracellular,cytoskeleton	cell differentiation,regulation of biological process,development,cell organization and biogenesis,metabolic process,cell proliferation,response to stimulus,transport,cell communication	catalytic activity,nucleotide binding,structural molecule activity,signal transducer activity,protein binding,motor activity	Secreted > extracellular space > extracellular matrix.	Type VI collagen family	VWFA domains (3)
P12111-2	CO6A3_HUMAN	CO6A3_HUMAN	P12111-2	COL6A3	Isoform 2 of Collagen alpha-3(VI) chain	Homo sapiens	X	X	3	S	S	extr	extr	extr	membrane,cytoplasm,extracellular	cell differentiation,development,cell organization and biogenesis,response to stimulus,transport	structural molecule activity,protein binding,enzyme regulator activity	Secreted > extracellular space > extracellular matrix.	Type VI collagen family	BPTI/Kunitz inhibitor domain (1); Collagen-like domains (5); Fibronectin type-III domain (1); LRR (leucine-rich) repeats (16); VWFA domains (12)
P12236	ADT3_HUMAN		P12236	SLC25A6	ADP/ATP translocase 3	Homo sapiens	X		3		_	cyto	cyto	mito	membrane,cytoplasm,mitochondrion	defense response,cell differentiation,regulation of biological process,reproduction,cell organization and biogenesis,metabolic process,cell death,response to stimulus,transport,cell communication	catalytic activity,metal ion binding,protein binding,transporter activity	Mitochondrion inner membrane; Multi-pass membrane protein.	Mitochondrial carrier family	Solcar repeats (3)
P12277	KCRB_HUMAN	KCRB_HUMAN	P12277	CKB	Creatine kinase B-type	Homo sapiens	X	X	0		_	cyto	cyto	cyto	membrane,cytoplasm,cytosol,mitochondrion	regulation of biological process,development,cellular homeostasis,metabolic process,transport	catalytic activity,nucleotide binding,signal transducer activity,protein binding,transporter activity	Cytoplasm.	ATP:guanido phosphotransferase family	Phosphagen kinase C-terminal domain (1); Phosphagen kinase N-terminal domain (1)
P12814	ACTN1_HUMAN	ACTN1_HUMAN	P12814	ACTN1	Alpha-actinin-1	Homo sapiens	X	X	1		_	cyto_nucl	cyto	cyto,cyto	membrane,cytoplasm,nucleus,cytosol,extracellular,organelle lumen,cytoskeleton	coagulation,cell differentiation,regulation of biological process,cellular component movement,cell organization and biogenesis,metabolic process,cell death,response to stimulus,transport	catalytic activity,structural molecule activity,signal transducer activity,metal ion binding,protein binding	Cytoplasm > cytoskeleton. Cytoplasm > myofibril > sarcomere > Z-disk.	Alpha-actinin family	Actin-binding domain (1); CH (calponin-homology) domains (2); EF-hand domains (2); Spectrin repeats (4)
P12829	MYL4_HUMAN	MYL4_HUMAN	P12829	MYL4	Myosin light chain 4	Homo sapiens	X	X	0		_	cyto	cyto	-	cytoplasm,nucleus,cytosol,cytoskeleton	regulation of biological process,development,metabolic process,transport	catalytic activity,DNA binding,structural molecule activity,metal ion binding,protein binding,transporter activity,motor activity			EF-hand domains (3)
P12882	MYH1_HUMAN	MYH1_HUMAN	P12882	MYH1	Myosin-1	Homo sapiens	X	X	1		_	cyto	cyto	cyto	membrane,cytoplasm,nucleus,organelle lumen,cytoskeleton	development,cell organization and biogenesis,metabolic process,transport	catalytic activity,nucleotide binding,structural molecule activity,protein binding,motor activity	Cytoplasm > myofibril.		IQ domain (1); Myosin head-like domain (1)
P12883	MYH7_HUMAN	MYH7_HUMAN	P12883	MYH7	Myosin-7	Homo sapiens	X	X	0		_	cyto	cyto	cyto	membrane,cytoplasm,cytosol,nucleus,organelle lumen,chromosome,cytoskeleton	regulation of biological process,cell differentiation,development,cell organization and biogenesis,metabolic process,response to stimulus,transport	catalytic activity,nucleotide binding,structural molecule activity,metal ion binding,protein binding,motor activity,transporter activity	Cytoplasm > myofibril.		IQ domain (1); Myosin head-like domain (1)
P12956	XRCC6_HUMAN	KU70_HUMAN	P12956	XRCC6	X-ray repair cross-complementing protein 6	Homo sapiens	X	X	0		_	cyto	nucl	nucl,nucl	membrane,cytoplasm,nucleus,organelle lumen,chromosome	regulation of biological process,cell differentiation,reproduction,development,cell organization and biogenesis,metabolic process,response to stimulus	catalytic activity,transcription regulator activity,nucleotide binding,DNA binding,protein binding	Nucleus. Chromosome.	Ku70 family	Ku domain (1); SAP domain (1)
P13010		KU86_HUMAN	P13010	XRCC5	X-ray repair cross-complementing protein 5	Homo sapiens		X	0		_	cyto	nucl	nucl,nucl	membrane,cytoplasm,nucleus,organelle lumen,chromosome	regulation of biological process,cell differentiation,reproduction,development,cell organization and biogenesis,metabolic process,cell proliferation,cell death,response to stimulus	catalytic activity,DNA binding,transcription regulator activity,nucleotide binding,signal transducer activity,protein binding,receptor activity	Nucleus. Chromosome.	Ku80 family	Ku domain (1)
P13473-2	LAMP2_HUMAN		P13473-2	LAMP2	Isoform LAMP-2B of Lysosome-associated membrane glycoprotein 2	Homo sapiens	X		1	S	S	extr	plas	plas,endo,lyso	membrane,endosome,cytoplasm,vacuole	coagulation,metabolic process,response to stimulus,transport	catalytic activity,transporter activity	Cell membrane; Single-pass type I membrane protein. Endosome membrane; Single-pass type I membrane protein. Lysosome membrane; Single-pass type I membrane protein.	LAMP family
P13489	RINI_HUMAN	RINI_HUMAN	P13489	RNH1	Ribonuclease inhibitor	Homo sapiens	X	X	0		_	cyto_nucl	cyto	cyto	ribosome,cytoplasm,nucleus,extracellular,vacuole,organelle lumen	regulation of biological process,cell differentiation,reproduction,cellular component movement,development,cell organization and biogenesis,metabolic process,cell proliferation,cell death,response to stimulus,transport,cell communication	catalytic activity,DNA binding,metal ion binding,protein binding,enzyme regulator activity,RNA binding	Cytoplasm.		LRR (leucine-rich) repeats (15)
P13533	MYH6_HUMAN		P13533	MYH6	Myosin-6	Homo sapiens	X		0		_	nucl	cyto	cyto	membrane,cytoplasm,nucleus,cytosol,organelle lumen,cytoskeleton	cell differentiation,regulation of biological process,development,cell organization and biogenesis,metabolic process,transport	catalytic activity,nucleotide binding,structural molecule activity,protein binding,motor activity	Cytoplasm > myofibril.		IQ domain (1); Myosin head-like domain (1)
P13535	MYH8_HUMAN	MYH8_HUMAN	P13535	MYH8	Myosin-8	Homo sapiens	X	X	0		_	cyto	cyto	cyto	membrane,cytoplasm,nucleus,cytosol,chromosome,cytoskeleton	cell organization and biogenesis,metabolic process,response to stimulus,transport	catalytic activity,nucleotide binding,structural molecule activity,protein binding,motor activity	Cytoplasm > myofibril.		IQ domain (1); Myosin head-like domain (1)
P13591-3		NCA12_HUMAN	P13591-3	NCAM1	Isoform 3 of Neural cell adhesion molecule 1	Homo sapiens		X	1		S	pero	plas	plas,plas,extr	membrane,Golgi,cytoplasm,cytosol,extracellular,cell surface	cell differentiation,regulation of biological process,development,cell organization and biogenesis,metabolic process,response to stimulus,cell communication	catalytic activity,nucleotide binding,signal transducer activity,protein binding,receptor activity	Cell membrane; Single-pass type I membrane protein. Cell membrane; Lipid-anchor > GPI-anchor. Secreted.		Fibronectin type-III domains (2); Ig-like C2-type (immunoglobulin-like) domains (5)
P13591-6	NCAM1_HUMAN		P13591-6	NCAM1	Isoform 6 of Neural cell adhesion molecule 1	Homo sapiens	X		1		S	pero	plas	plas,plas,extr	membrane,Golgi,cytoplasm,extracellular,cell surface	cell differentiation,regulation of biological process,development,cell organization and biogenesis,response to stimulus,cell communication	protein binding	Cell membrane; Single-pass type I membrane protein. Cell membrane; Lipid-anchor > GPI-anchor. Secreted.		Fibronectin type-III domains (2); Ig-like C2-type (immunoglobulin-like) domains (5)
P13612	ITA4_HUMAN		P13612	ITGA4	Integrin alpha-4	Homo sapiens	X		1		S	pero	plas	plas	membrane,cell surface	coagulation,regulation of biological process,cell differentiation,cellular component movement,development,response to stimulus	signal transducer activity,metal ion binding,protein binding,receptor activity	Membrane; Single-pass type I membrane protein.	Integrin alpha chain family	FG-GAP repeats (7)
P13639	EF2_HUMAN	EF2_HUMAN	P13639	EEF2	Elongation factor 2	Homo sapiens	X	X	0		_	cyto	cyto	cyto	cytoplasm,cytosol	metabolic process	translation regulator activity,catalytic activity,nucleotide binding,protein binding,RNA binding	Cytoplasm.	GTP-binding elongation factor family, EF-G/EF-2 subfamily
P13645		K1C10_HUMAN	P13645	KRT10	Keratin, type I cytoskeletal 10	Homo sapiens		X	0		_	nucl	cyto	-	membrane,cytoskeleton	development,cell organization and biogenesis,metabolic process	structural molecule activity,protein binding		Intermediate filament family
P13667	PDIA4_HUMAN		P13667	PDIA4	Protein disulfide-isomerase A4	Homo sapiens	X		0	S	S	E.R.	cyto	E.R.,cyve	cytoplasm,endoplasmic reticulum,organelle lumen	regulation of biological process,cell organization and biogenesis,cellular homeostasis,metabolic process,transport	catalytic activity,metal ion binding,protein binding	Endoplasmic reticulum lumen. Melanosome.	Protein disulfide isomerase family	Thioredoxin domains (3)
P13674-2	P4HA1_HUMAN	P4HA1_HUMAN	P13674-2	P4HA1	Isoform 2 of Prolyl 4-hydroxylase subunit alpha-1	Homo sapiens	X	X	0	S	S	E.R.	cyto	E.R.	cytoplasm,endoplasmic reticulum,extracellular,mitochondrion,organelle lumen	cell organization and biogenesis,metabolic process	catalytic activity,metal ion binding,protein binding	Endoplasmic reticulum lumen.	P4HA family	Fe2OG dioxygenase domain (1); TPR repeat (1)
P13693		TCTP_HUMAN	P13693	TPT1	Translationally-controlled tumor protein	Homo sapiens		X	0		_	cyto_nucl	cyto	cyto	endosome,cytoplasm,extracellular,cytoskeleton	regulation of biological process,cell differentiation,cellular homeostasis,cell death,response to stimulus,transport	metal ion binding,protein binding	Cytoplasm.	TCTP family
P13805-3	TNNT1_HUMAN	TNNT1_HUMAN	P13805-3	TNNT1	Isoform 3 of Troponin T, slow skeletal muscle	Homo sapiens	X	X	0		_	nucl	-	-	cytoplasm,cytosol,cytoskeleton	regulation of biological process,transport	protein binding		Troponin T family
P13807	GYS1_HUMAN	GYS1_HUMAN	P13807	GYS1	Glycogen [starch] synthase, muscle	Homo sapiens	X	X	2		_	nucl	cyto	-	cytoplasm,cytosol	development,metabolic process	catalytic activity,protein binding		Glycosyltransferase 3 family		Glycan biosynthesis; glycogen biosynthesis.
P13987	CD59_HUMAN	CD59_HUMAN	P13987	CD59	CD59 glycoprotein	Homo sapiens	X	X	0	S	S	extr	plas	plas,extr	membrane,extracellular,cell surface	defense response,coagulation,regulation of biological process,response to stimulus,cell communication	protein binding	Cell membrane; Lipid-anchor > GPI-anchor. Secreted.		UPAR/Ly6 domain (1)
P14174		MIF_HUMAN	P14174	MIF	Macrophage migration inhibitory factor	Homo sapiens		X	0		_	cyto_nucl	extr	extr,cyto	cytoplasm,nucleus,extracellular,organelle lumen,cell surface	defense response,cell differentiation,regulation of biological process,cell organization and biogenesis,cell proliferation,metabolic process,cell death,response to stimulus,transport,cell communication	catalytic activity,nucleotide binding,DNA binding,metal ion binding,signal transducer activity,protein binding	Secreted. Cytoplasm.	MIF family
P14314	GLU2B_HUMAN		P14314	PRKCSH	Glucosidase 2 subunit beta	Homo sapiens	X		0	S	S	extr	cyto	E.R.	cytoplasm,endoplasmic reticulum,extracellular,organelle lumen	defense response,regulation of biological process,cell organization and biogenesis,cellular homeostasis,metabolic process,response to stimulus,transport,cell communication	catalytic activity,metal ion binding,protein binding,RNA binding,transporter activity	Endoplasmic reticulum.		EF-hand domains (2); PRKCSH domain (1)	Glycan metabolism; N-glycan metabolism.
P14618-2	KPYM_HUMAN	KPYM_HUMAN	P14618-2	PKM2	Isoform M1 of Pyruvate kinase isozymes M1/M2	Homo sapiens	X	X	0		_	cyto	cyto	cyto,nucl	membrane,cytoplasm,cytosol,nucleus,mitochondrion	metabolic process,cell death	catalytic activity,nucleotide binding,metal ion binding,protein binding	Cytoplasm. Nucleus.	Pyruvate kinase family		Carbohydrate degradation; glycolysis; pyruvate from D-glyceraldehyde 3-phosphate: step 5/5.
P14625	ENPL_HUMAN	ENPL_HUMAN	P14625	HSP90B1	Endoplasmin	Homo sapiens	X	X	1	S	S	E.R.	cyto	E.R.,cyve	membrane,cytoplasm,nucleus,endoplasmic reticulum,cytosol,organelle lumen	regulation of biological process,cell differentiation,cell organization and biogenesis,cellular homeostasis,metabolic process,cell death,response to stimulus,transport	catalytic activity,nucleotide binding,signal transducer activity,metal ion binding,protein binding,RNA binding	Endoplasmic reticulum lumen. Melanosome.	Heat shock protein 90 family
P14649	MYL6B_HUMAN	MYL6B_HUMAN	P14649	MYL6B	Myosin light chain 6B	Homo sapiens	X	X	0		_	cyto	cyto	-	cytoplasm,cytosol,cytoskeleton	cell differentiation,development,cell organization and biogenesis,response to stimulus,transport	catalytic activity,nucleotide binding,structural molecule activity,metal ion binding,protein binding,motor activity,transporter activity			EF-hand domains (3)
P14678-3		RSMB_HUMAN	P14678-3	SNRPB	Isoform SM-B1 of Small nuclear ribonucleoprotein-associated proteins B and B'	Homo sapiens		X	0		_	cyto	nucl	nucl	spliceosomal complex,cytoplasm,nucleus,cytosol,organelle lumen	regulation of biological process,cell organization and biogenesis,metabolic process	protein binding,RNA binding	Nucleus.	SnRNP SmB/SmN family
P14866	HNRPL_HUMAN	HNRPL_HUMAN	P14866	HNRNPL	Heterogeneous nuclear ribonucleoprotein L	Homo sapiens	X	X	0		M	nucl	nucl	nucl,cyto	membrane,cytoplasm,nucleus,organelle lumen	metabolic process,transport	nucleotide binding,DNA binding,structural molecule activity,protein binding,RNA binding,transporter activity	Nucleus > nucleoplasm. Cytoplasm.		RRM (RNA recognition motif) domains (3)
P14868	SYDC_HUMAN		P14868	DARS	Aspartyl-tRNA synthetase, cytoplasmic	Homo sapiens	X		0		_	cyto	cyto	cyto	membrane,cytoplasm,nucleus,cytosol,cell surface	cell differentiation,regulation of biological process,cell organization and biogenesis,metabolic process,transport	catalytic activity,nucleotide binding,protein binding	Cytoplasm.	Class-II aminoacyl-tRNA synthetase family
P15259	PGAM2_HUMAN		P15259	PGAM2	Phosphoglycerate mutase 2	Homo sapiens	X		0		_	cyto	cyto	-	membrane,cytoplasm,nucleus,cytosol,cytoskeleton	regulation of biological process,reproduction,cell organization and biogenesis,metabolic process,cell proliferation,cell death,response to stimulus,transport,cell communication	catalytic activity,signal transducer activity,metal ion binding,protein binding,transporter activity		Phosphoglycerate mutase family, BPG-dependent PGAM subfamily
P15311		EZRI_HUMAN	P15311	EZR	Ezrin	Homo sapiens		X	0		_	cyto	plas	plas,plas,plas,plas,cyto,cyto	membrane,cytoplasm,nucleus,cytosol,organelle lumen,cytoskeleton	regulation of biological process,cell differentiation,development,cell organization and biogenesis,response to stimulus	structural molecule activity,protein binding	Apical cell membrane; Peripheral membrane protein; Cytoplasmic side. Cell projection. Cell projection > microvillus membrane; Peripheral membrane protein; Cytoplasmic side. Cell projection > ruffle membrane; Peripheral membrane protein; Cytoplasmic side. Cytoplasm > cell cortex. Cytoplasm > cytoskeleton.		FERM domain (1)
P15531-2	NDKA_HUMAN		P15531-2	NME1	Isoform 2 of Nucleoside diphosphate kinase A	Homo sapiens	X		0		_	cyto	nucl	cyto,nucl	membrane,cytoplasm,nucleus,cytosol,mitochondrion,cytoskeleton	regulation of biological process,cell differentiation,reproduction,development,cell organization and biogenesis,cell proliferation,metabolic process,cell death,response to stimulus,transport	catalytic activity,DNA binding,nucleotide binding,metal ion binding,protein binding	Cytoplasm. Nucleus.	NDK family
P15880	RS2_HUMAN	RS2_HUMAN	P15880	RPS2	40S ribosomal protein S2	Homo sapiens	X	X	1		_	cyto	cyto	-	membrane,ribosome,cytoplasm,cytosol,nucleus,organelle lumen	regulation of biological process,reproduction,development,cell organization and biogenesis,metabolic process,response to stimulus	translation regulator activity,catalytic activity,DNA binding,structural molecule activity,metal ion binding,protein binding,RNA binding		Ribosomal protein S5P family	S5 DRBM domain (1)
P16070-9		CD44_HUMAN	P16070-9	CD44	Isoform 9 of CD44 antigen	Homo sapiens		X	1	S	S	extr_plas	plas	plas	membrane,Golgi,cytoplasm,nucleus,cell surface	defense response,regulation of biological process,cell differentiation,reproduction,development,cellular component movement,cell organization and biogenesis,cell growth,metabolic process,cell death,response to stimulus,cell communication	signal transducer activity,protein binding,receptor activity	Membrane; Single-pass type I membrane protein.		Link domain (1)
P16401	H15_HUMAN	H15_HUMAN	P16401	HIST1H1B	Histone H1.5	Homo sapiens	X	X	0		_	nucl	nucl	nucl,nucl	nucleus,chromosome	cell differentiation,regulation of biological process,development,cell organization and biogenesis,metabolic process	catalytic activity,nucleotide binding,DNA binding,protein binding,enzyme regulator activity	Nucleus. Chromosome.	Histone H1/H5 family	H15 (linker histone H1/H5 globular) domain (1)
P16403	H12_HUMAN	H12_HUMAN	P16403	HIST1H1C	Histone H1.2	Homo sapiens	X	X	0		_	nucl	nucl	nucl,nucl	nucleus,extracellular,chromosome	regulation of biological process,cell differentiation,reproduction,cell organization and biogenesis,metabolic process	catalytic activity,DNA binding,nucleotide binding,structural molecule activity,protein binding	Nucleus. Chromosome.	Histone H1/H5 family	H15 (linker histone H1/H5 globular) domain (1)
P16989-3		DBPA_HUMAN	P16989-3	CSDA	Isoform 3 of DNA-binding protein A	Homo sapiens		X	0		_	nucl	nucl	cyto,nucl	membrane,cytoplasm,nucleus	regulation of biological process,reproduction,development,metabolic process,cell death,response to stimulus	transcription regulator activity,DNA binding,protein binding,RNA binding	Cytoplasm. Nucleus.		CSD (cold-shock) domain (1)
P17096-3	HMGA1_HUMAN	HMGA1_HUMAN	P17096-3	HMGA1	Isoform HMG-R of High mobility group protein HMG-I/HMG-Y	Homo sapiens	X	X	0		_	nucl	nucl	nucl,nucl	membrane,cytoplasm,nucleus,cytosol,extracellular,organelle lumen,chromosome	regulation of biological process,reproduction,cell organization and biogenesis,metabolic process,transport,cell communication	DNA binding,transcription regulator activity,signal transducer activity,protein binding,receptor activity	Nucleus. Chromosome.	HMGA family	A.T hook DNA-binding domains (3)
P17655		CAN2_HUMAN	P17655	CAPN2	Calpain-2 catalytic subunit	Homo sapiens		X	1		_	cyto	cyto	cyto,plas	membrane,cytoplasm	cell differentiation,development,metabolic process,response to stimulus	catalytic activity,metal ion binding,protein binding	Cytoplasm. Cell membrane.	Peptidase C2 family	Calpain catalytic domain (1); EF-hand domains (3)
P17661	DESM_HUMAN	DESM_HUMAN	P17661	DES	Desmin	Homo sapiens	X	X	0		M	mito	cyto	cyto	membrane,cytoplasm,cytosol,cytoskeleton	regulation of biological process,development,cell organization and biogenesis,metabolic process,transport,cell communication	catalytic activity,structural molecule activity,protein binding	Cytoplasm.	Intermediate filament family
P17844	DDX5_HUMAN	DDX5_HUMAN	P17844	DDX5	Probable ATP-dependent RNA helicase DDX5	Homo sapiens	X	X	0		_	nucl	nucl	nucl	spliceosomal complex,cytoplasm,nucleus,organelle lumen	regulation of biological process,development,cell organization and biogenesis,cell growth,metabolic process	catalytic activity,nucleotide binding,transcription regulator activity,protein binding,RNA binding	Nucleus > nucleolus.	DEAD box helicase family, DDX5/DBP2 subfamily	Helicase ATP-binding domain (1); Helicase C-terminal domain (1)
P17980		PRS6A_HUMAN	P17980	PSMC3	26S protease regulatory subunit 6A	Homo sapiens		X	0		_	cyto	nucl	cyto,nucl	proteasome,membrane,cytoplasm,cytosol,nucleus,mitochondrion	regulation of biological process,development,metabolic process,cell death,response to stimulus,transport	catalytic activity,DNA binding,transcription regulator activity,nucleotide binding,signal transducer activity,metal ion binding,protein binding	Cytoplasm. Nucleus.	AAA ATPase family
P17987		TCPA_HUMAN	P17987	TCP1	T-complex protein 1 subunit alpha	Homo sapiens		X	2		_	cyto	cyto	cyto,cyto	membrane,Golgi,endosome,cytoplasm,cytosol,nucleus,extracellular,organelle lumen,chromosome,cytoskeleton	regulation of biological process,cell organization and biogenesis,metabolic process,response to stimulus,transport	nucleotide binding,structural molecule activity,protein binding	Cytoplasm. Cytoplasm > cytoskeleton > centrosome.	TCP-1 chaperonin family
P18031		PTN1_HUMAN	P18031	PTPN1	Tyrosine-protein phosphatase non-receptor type 1	Homo sapiens		X	1		_	cyto	cyto	E.R.	membrane,cytoplasm,nucleus,cytosol,endoplasmic reticulum,extracellular	coagulation,regulation of biological process,reproduction,development,cell organization and biogenesis,metabolic process,response to stimulus,transport,cell communication	catalytic activity,nucleotide binding,metal ion binding,signal transducer activity,protein binding,transporter activity,receptor activity	Endoplasmic reticulum membrane; Peripheral membrane protein; Cytoplasmic side.	Protein-tyrosine phosphatase family, Non-receptor class 1 subfamily	Tyrosine-protein phosphatase domain (1)
P18124	RL7_HUMAN	RL7_HUMAN	P18124	RPL7	60S ribosomal protein L7	Homo sapiens	X	X	0		_	cyto	cyto	-	ribosome,cytoplasm,cytosol	regulation of biological process,reproduction,development,cell organization and biogenesis,metabolic process	DNA binding,transcription regulator activity,structural molecule activity,protein binding,RNA binding		Ribosomal protein L30P family
P18206-3	VINC_HUMAN	VINC_HUMAN	P18206-3	VCL	Isoform 3 of Vinculin	Homo sapiens	X	X	0		_	cyto	plas	cyto,plas,plas	membrane,cytoplasm,cytosol,extracellular,cytoskeleton	coagulation,regulation of biological process,cellular component movement,cell organization and biogenesis,metabolic process,response to stimulus,transport	catalytic activity,structural molecule activity,protein binding	Cytoplasm > cytoskeleton. Cell junction > adherens junction. Cell membrane; Peripheral membrane protein; Cytoplasmic side.	Vinculin/alpha-catenin family
P18621		RL17_HUMAN	P18621	RPL17	60S ribosomal protein L17	Homo sapiens		X	0		_	cyto	cyto	-	ribosome,cytoplasm,nucleus,cytosol,organelle lumen	cell differentiation,regulation of biological process,reproduction,development,cell organization and biogenesis,metabolic process,response to stimulus,cell communication	catalytic activity,transcription regulator activity,nucleotide binding,structural molecule activity,signal transducer activity,metal ion binding,protein binding,RNA binding		Ribosomal protein L22P family
P18669		PGAM1_HUMAN	P18669	LOC643576	Phosphoglycerate mutase 1	Homo sapiens		X	0		_	cyto	cyto	-	cytoplasm,cytosol,extracellular	defense response,regulation of biological process,metabolic process,response to stimulus	catalytic activity,metal ion binding,antioxidant activity,protein binding		Phosphoglycerate mutase family, BPG-dependent PGAM subfamily
P19105		MLRM_HUMAN	P19105	MYL12A	Myosin regulatory light chain 12A	Homo sapiens		X	0		_	mito	-	-	cytoplasm,cytoskeleton	regulation of biological process	catalytic activity,metal ion binding,protein binding,motor activity			EF-hand domains (3)
P19237	TNNI1_HUMAN	TNNI1_HUMAN	P19237	TNNI1	Troponin I, slow skeletal muscle	Homo sapiens	X	X	0		_	nucl	-	-	cytoplasm,cytosol,cytoskeleton	regulation of biological process,development,metabolic process,transport	catalytic activity,DNA binding,metal ion binding,protein binding		Troponin I family
P19338	NUCL_HUMAN	NUCL_HUMAN	P19338	NCL	Nucleolin	Homo sapiens	X	X	0		_	nucl	nucl	nucl,cyto	cytoplasm,nucleus,organelle lumen,chromosome	development,cell organization and biogenesis,metabolic process	catalytic activity,DNA binding,nucleotide binding,protein binding,RNA binding	Nucleus > nucleolus. Cytoplasm.		RRM (RNA recognition motif) domains (4)
P19367-4	HXK1_HUMAN		P19367-4	HK1	Isoform 4 of Hexokinase-1	Homo sapiens	X		1		_	cyto	cyto	mito	membrane,cytoplasm,nucleus,cytosol,mitochondrion,organelle lumen	metabolic process,transport	catalytic activity,nucleotide binding	Mitochondrion outer membrane.	Hexokinase family		Carbohydrate metabolism; hexose metabolism.
P20020-6	AT2B1_HUMAN		P20020-6	ATP2B1	Isoform K of Plasma membrane calcium-transporting ATPase 1	Homo sapiens	X		9		_	plas	plas	plas	membrane	coagulation,metabolic process,response to stimulus,transport	catalytic activity,nucleotide binding,metal ion binding,protein binding,transporter activity	Cell membrane; Multi-pass membrane protein.	Cation transport ATPase (P-type) (TC 3.A.3) family, Type IIB subfamily
P20339	RAB5A_HUMAN		P20339	RAB5A	Ras-related protein Rab-5A	Homo sapiens	X		0		_	mito	cyto	plas,endo,cyve	membrane,endosome,cytoplasm	coagulation,regulation of biological process,cell organization and biogenesis,metabolic process,response to stimulus,transport,cell communication	catalytic activity,nucleotide binding,metal ion binding,protein binding,enzyme regulator activity	Cell membrane; Lipid-anchor; Cytoplasmic side. Early endosome membrane; Lipid-anchor. Melanosome.	Small GTPase superfamily, Rab family
P20618		PSB1_HUMAN	P20618	PSMB1	Proteasome subunit beta type-1	Homo sapiens		X	2		_	cyto	cyto	cyto,nucl	proteasome,membrane,cytoplasm,endoplasmic reticulum,nucleus,cytosol,mitochondrion,organelle lumen,cytoskeleton	regulation of biological process,cell organization and biogenesis,metabolic process,cell death,response to stimulus,transport	catalytic activity,metal ion binding,antioxidant activity,protein binding,enzyme regulator activity	Cytoplasm. Nucleus.	Peptidase T1B family
P20671		H2A1D_HUMAN	P20671	HIST1H2AD	Histone H2A type 1-D	Homo sapiens		X	1		_	nucl	nucl	nucl,nucl	nucleus,chromosome	cell differentiation,cell organization and biogenesis,metabolic process	catalytic activity,DNA binding	Nucleus. Chromosome.	Histone H2A family
P20674	COX5A_HUMAN		P20674	COX5A	Cytochrome c oxidase subunit 5A, mitochondrial	Homo sapiens	X		0		M	mito	cyto	mito	membrane,cytoplasm,mitochondrion	metabolic process,transport	catalytic activity,metal ion binding,protein binding,transporter activity	Mitochondrion inner membrane.	Cytochrome c oxidase subunit 5A family
P20700	LMNB1_HUMAN	LMNB1_HUMAN	P20700	LMNB1	Lamin-B1	Homo sapiens	X	X	0		M	nucl	nucl	nucl	membrane,nucleus,organelle lumen,cytoskeleton	cell organization and biogenesis,cell death,transport	catalytic activity,nucleotide binding,structural molecule activity,protein binding,motor activity	Nucleus inner membrane; Lipid-anchor; Nucleoplasmic side.	Intermediate filament family
P20810-7		ICAL_HUMAN	P20810-7	CAST	Isoform 7 of Calpastatin	Homo sapiens		X	0		_	nucl	cyto	-		cell differentiation,regulation of biological process,metabolic process	protein binding,enzyme regulator activity		Protease inhibitor I27 (calpastatin) family
P20908		CO5A1_HUMAN	P20908	COL5A1	Collagen alpha-1(V) chain	Homo sapiens		X	0	S	S	extr	extr	extr	membrane,cytoplasm,extracellular	regulation of biological process,cell differentiation,cellular component movement,development,cell organization and biogenesis,cellular homeostasis,metabolic process,response to stimulus,transport	catalytic activity,structural molecule activity,metal ion binding,protein binding	Secreted > extracellular space > extracellular matrix.	Fibrillar collagen family	Fibrillar collagen NC1 domain (1); Laminin G-like domain (1); TSP N-terminal (TSPN) domain (1)
P21291		CSRP1_HUMAN	P21291	CSRP1	Cysteine and glycine-rich protein 1	Homo sapiens		X	0		_	nucl	nucl	nucl	nucleus,cytoskeleton	cell organization and biogenesis	metal ion binding,protein binding	Nucleus.		LIM zinc-binding domains (2)
P21333-2	FLNA_HUMAN	FLNA_HUMAN	P21333-2	FLNA	Isoform 2 of Filamin-A	Homo sapiens	X	X	1		_	cyto	cyto	cyto,cyto	membrane,Golgi,cytoplasm,nucleus,cytosol,extracellular,cytoskeleton	coagulation,regulation of biological process,development,cellular component movement,cell organization and biogenesis,metabolic process,response to stimulus,transport,cell communication	signal transducer activity,protein binding	Cytoplasm > cell cortex. Cytoplasm > cytoskeleton.	Filamin family	Actin-binding domain (1); CH (calponin-homology) domains (2); Filamin repeats (24)
P21589	5NTD_HUMAN	5NTD_HUMAN	P21589	NT5E	5'-nucleotidase	Homo sapiens	X	X	0	S	S	pero	plas	plas	membrane,cytoplasm,extracellular	defense response,regulation of biological process,metabolic process,response to stimulus	catalytic activity,DNA binding,nucleotide binding,metal ion binding,protein binding	Cell membrane; Lipid-anchor > GPI-anchor.	5'-nucleotidase family
P21796	VDAC1_HUMAN		P21796	VDAC1	Voltage-dependent anion-selective channel protein 1	Homo sapiens	X		0		_	cyto	cyto	mito,plas	membrane,cytoplasm,mitochondrion,organelle lumen	defense response,regulation of biological process,cell differentiation,metabolic process,cell death,response to stimulus,transport,cell communication	protein binding,transporter activity	Mitochondrion outer membrane. Cell membrane.	Eukaryotic mitochondrial porin family
P21964-2	COMT_HUMAN		P21964-2	COMT	Isoform Soluble of Catechol O-methyltransferase	Homo sapiens	X		0		S	extr	cyto	cyto,plas	membrane,cytoplasm,cytosol,nucleus,extracellular,mitochondrion,cell surface	regulation of biological process,reproduction,cell proliferation,metabolic process,response to stimulus,cell communication	catalytic activity,metal ion binding,protein binding	Cytoplasm. Cell membrane; Single-pass type II membrane protein; Extracellular side.	Mammalian catechol-O-methyltransferase family
P22087	FBRL_HUMAN	FBRL_HUMAN	P22087	FBL	rRNA 2'-O-methyltransferase fibrillarin	Homo sapiens	X	X	0		_	nucl	nucl	nucl	membrane,nucleus,organelle lumen	reproduction,cell organization and biogenesis,metabolic process,response to stimulus,transport	catalytic activity,metal ion binding,protein binding,RNA binding,transporter activity	Nucleus > nucleolus.	Methyltransferase superfamily, Fibrillarin family
P22307-2	NLTP_HUMAN		P22307-2	SCP2	Isoform SCP2 of Non-specific lipid-transfer protein	Homo sapiens	X		0		_	cyto	cyto	cyto,mito,pero,mito	cytoplasm,nucleus,mitochondrion,organelle lumen	cell organization and biogenesis,metabolic process,transport	catalytic activity,protein binding	Cytoplasm. Mitochondrion. Peroxisome. Mitochondrion.	Thiolase family	SCP2 domain (1)
P22314	UBA1_HUMAN	UBE1_HUMAN	P22314	UBA1	Ubiquitin-like modifier-activating enzyme 1	Homo sapiens	X	X	5		_	nucl	cyto	-	spliceosomal complex,membrane,ribosome,endosome,cytoplasm,nucleus,cytosol,organelle lumen	regulation of biological process,cell differentiation,reproduction,development,cell organization and biogenesis,metabolic process,cell death,response to stimulus,transport,cell communication	catalytic activity,transcription regulator activity,nucleotide binding,protein binding,RNA binding		Ubiquitin-activating E1 family		Protein modification; protein ubiquitination.
P22626-2	ROA2_HUMAN	ROA2_HUMAN	P22626-2	HNRNPA2B1	Isoform A2 of Heterogeneous nuclear ribonucleoproteins A2/B1	Homo sapiens	X	X	0		_	nucl	nucl	nucl,cyto	spliceosomal complex,cytoplasm,nucleus,organelle lumen	metabolic process,transport	nucleotide binding,DNA binding,protein binding,RNA binding	Nucleus > nucleoplasm. Cytoplasm.		RRM (RNA recognition motif) domains (2)
P22695	QCR2_HUMAN		P22695	UQCRC2	Cytochrome b-c1 complex subunit 2, mitochondrial	Homo sapiens	X		1		M	mito	cyto	mito	membrane,cytoplasm,nucleus,mitochondrion	metabolic process,transport	catalytic activity,metal ion binding,protein binding,transporter activity	Mitochondrion inner membrane; Peripheral membrane protein; Matrix side.	Peptidase M16 family, UQCRC2/QCR2 subfamily
P23229-9	ITA6_HUMAN		P23229-9	ITGA6	Isoform 9 of Integrin alpha-6	Homo sapiens	X		2	S	S	pero	plas	plas	membrane,extracellular,cell surface	coagulation,regulation of biological process,cell differentiation,cellular component movement,development,cell organization and biogenesis,cell death,response to stimulus,cell communication	signal transducer activity,metal ion binding,protein binding,receptor activity	Cell membrane; Single-pass type I membrane protein.	Integrin alpha chain family	FG-GAP repeats (7)
P23246-2	SFPQ_HUMAN	SFPQ_HUMAN	P23246-2	SFPQ	Isoform Short of Splicing factor, proline- and glutamine-rich	Homo sapiens	X	X	0		_	nucl	nucl	nucl	membrane,nucleus,organelle lumen	regulation of biological process,metabolic process,response to stimulus,cell communication	nucleotide binding,DNA binding,structural molecule activity,signal transducer activity,protein binding,RNA binding,receptor activity	Nucleus matrix.		RRM (RNA recognition motif) domains (2)
P23284	PPIB_HUMAN	PPIB_HUMAN	P23284	PPIB	Peptidyl-prolyl cis-trans isomerase B	Homo sapiens	X	X	0	S	S	extr	cyto	E.R.,cyve	cytoplasm,endoplasmic reticulum,cytosol,extracellular,organelle lumen	metabolic process,transport	catalytic activity,metal ion binding,protein binding,transporter activity	Endoplasmic reticulum lumen. Melanosome.	Cyclophilin-type PPIase family, PPIase B subfamily	PPIase cyclophilin-type domain (1)
P23327	SRCH_HUMAN		P23327	HRC	Sarcoplasmic reticulum histidine-rich calcium-binding protein	Homo sapiens	X		0	S	S	extr	cyto	E.R.	membrane,cytoplasm,nucleus,endoplasmic reticulum,extracellular,organelle lumen	regulation of biological process,development,transport	structural molecule activity,metal ion binding,protein binding,transporter activity	Sarcoplasmic reticulum lumen.
P23396	RS3_HUMAN	RS3_HUMAN	P23396	RPS3	40S ribosomal protein S3	Homo sapiens	X	X	0		_	cyto	cyto	cyto	membrane,ribosome,cytoplasm,nucleus,cytosol	regulation of biological process,reproduction,development,cell organization and biogenesis,metabolic process,cell death,response to stimulus	translation regulator activity,catalytic activity,DNA binding,structural molecule activity,metal ion binding,protein binding,RNA binding	Cytoplasm.	Ribosomal protein S3P family	KH type-2 domain (1)
P23526	SAHH_HUMAN		P23526	AHCY	Adenosylhomocysteinase	Homo sapiens	X		1		_	cyto	cyto	cyto,cyve	membrane,cytoplasm,nucleus,cytosol	defense response,metabolic process,response to stimulus	catalytic activity,nucleotide binding,metal ion binding,protein binding	Cytoplasm. Melanosome.	Adenosylhomocysteinase family		Amino-acid biosynthesis; L-homocysteine biosynthesis; L-homocysteine from S-adenosyl-L-homocysteine: step 1/1.
P23528	COF1_HUMAN	COF1_HUMAN	P23528	CFL1	Cofilin-1	Homo sapiens	X	X	0		_	mito	nucl	nucl,cyto	cytoplasm,nucleus,organelle lumen,cytoskeleton	coagulation,cell differentiation,regulation of biological process,cell division,development,cellular component movement,cell organization and biogenesis,metabolic process,cell death,response to stimulus,transport,cell communication	protein binding	Nucleus matrix. Cytoplasm > cytoskeleton.	Actin-binding proteins ADF family	ADF-H domain (1)
P24534	EF1B_HUMAN	EF1B_HUMAN	P24534	EEF1B2	Elongation factor 1-beta	Homo sapiens	X	X	0		_	nucl	cyto	-	ribosome,cytoplasm,cytosol,extracellular,mitochondrion,cytoskeleton	regulation of biological process,metabolic process,transport	translation regulator activity,catalytic activity,nucleotide binding,protein binding,RNA binding		EF-1-beta/EF-1-delta family	GST C-terminal domain (1)
P24821-6		TENA_HUMAN	P24821-6	TNC	Isoform 6 of Tenascin	Homo sapiens		X	0	S	S	extr	extr	extr	extracellular	regulation of biological process,cell differentiation,reproduction,development,cell organization and biogenesis,cell proliferation,metabolic process,response to stimulus,cell communication	protein binding	Secreted > extracellular space > extracellular matrix.	Tenascin family	EGF-like domains (15); Fibrinogen C-terminal domain (1); Fibronectin type-III domains (15)
P24844		MLRN_HUMAN	P24844	MYL9	Myosin regulatory light polypeptide 9	Homo sapiens		X	0		M	mito	cyto	-	membrane,cytoplasm,cytosol,vacuole,cytoskeleton	regulation of biological process,cell differentiation,development,cell organization and biogenesis,metabolic process,response to stimulus,transport,cell communication	catalytic activity,nucleotide binding,structural molecule activity,metal ion binding,protein binding,motor activity			EF-hand domains (3)
P24928		RPB1_HUMAN	P24928	POLR2A	DNA-directed RNA polymerase II subunit RPB1	Homo sapiens		X	1		_	nucl	nucl	nucl	nucleus,organelle lumen	regulation of biological process,reproduction,cell organization and biogenesis,metabolic process,response to stimulus	catalytic activity,DNA binding,metal ion binding,protein binding	Nucleus.	RNA polymerase beta' chain family
P25398	RS12_HUMAN	RS12_HUMAN	P25398	RPS12	40S ribosomal protein S12	Homo sapiens	X	X	0		_	cyto	cyto	cyto	ribosome,cytoplasm,cytosol	reproduction,development,cell organization and biogenesis,metabolic process	structural molecule activity,RNA binding	Cytoplasm.	Ribosomal protein S12e family
P25705	ATPA_HUMAN		P25705	ATP5A1	ATP synthase subunit alpha, mitochondrial	Homo sapiens	X		0		M	mito	cyto	mito	membrane,cytoplasm,extracellular,mitochondrion,organelle lumen	regulation of biological process,development,metabolic process,cell proliferation,transport	catalytic activity,nucleotide binding,metal ion binding,protein binding,transporter activity	Mitochondrion inner membrane.	ATPase alpha/beta chains family
P25786-2		PSA1_HUMAN	P25786-2	PSMA1	Isoform Long of Proteasome subunit alpha type-1	Homo sapiens		X	0		_	cyto	cyto	cyto,nucl	proteasome,cytoplasm,nucleus,cytosol	regulation of biological process,metabolic process,cell death,response to stimulus	catalytic activity,protein binding,RNA binding	Cytoplasm. Nucleus.	Peptidase T1A family
P25787		PSA2_HUMAN	P25787	PSMA2	Proteasome subunit alpha type-2	Homo sapiens		X	1		_	cyto	cyto	cyto,nucl	proteasome,membrane,cytoplasm,nucleus,cytosol,extracellular	regulation of biological process,metabolic process,cell death,response to stimulus	catalytic activity,metal ion binding,antioxidant activity,protein binding,enzyme regulator activity	Cytoplasm. Nucleus.	Peptidase T1A family
P26038	MOES_HUMAN	MOES_HUMAN	P26038	MSN	Moesin	Homo sapiens	X	X	0		_	cyto	plas	plas,cyto,plas,plas	membrane,cytoplasm,cytosol,nucleus,organelle lumen,cytoskeleton	cell differentiation,cellular component movement,development,cell organization and biogenesis,metabolic process,cell death,transport	catalytic activity,nucleotide binding,structural molecule activity,metal ion binding,signal transducer activity,protein binding,motor activity,transporter activity	Cell membrane; Peripheral membrane protein; Cytoplasmic side. Cytoplasm > cytoskeleton. Apical cell membrane; Peripheral membrane protein; Cytoplasmic side. Cell projection > microvillus membrane; Peripheral membrane protein; Cytoplasmic side.		FERM domain (1)
P26196		DDX6_HUMAN	P26196	DDX6	Probable ATP-dependent RNA helicase DDX6	Homo sapiens		X	0		_	nucl	nucl	cyto	cytoplasm,cytosol,nucleus	metabolic process	catalytic activity,nucleotide binding,protein binding,RNA binding	Cytoplasm > P-body.	DEAD box helicase family, DDX6/DHH1 subfamily	Helicase ATP-binding domain (1); Helicase C-terminal domain (1)
P26368-2		U2AF2_HUMAN	P26368-2	U2AF2	Isoform 2 of Splicing factor U2AF 65 kDa subunit	Homo sapiens		X	0		_	nucl	nucl	nucl	spliceosomal complex,nucleus,organelle lumen	cell organization and biogenesis,metabolic process,transport	nucleotide binding,protein binding,RNA binding	Nucleus.	Splicing factor SR family	RRM (RNA recognition motif) domains (3)
P26373	RL13_HUMAN	RL13_HUMAN	P26373	RPL13	60S ribosomal protein L13	Homo sapiens	X	X	0		M	cyto	cyto	-	ribosome,cytoplasm,cytosol	regulation of biological process,reproduction,development,cell organization and biogenesis,metabolic process,response to stimulus,transport,cell communication	translation regulator activity,catalytic activity,nucleotide binding,DNA binding,structural molecule activity,metal ion binding,protein binding,RNA binding		Ribosomal protein L13e family
P26447	S10A4_HUMAN		P26447	S100A4	Protein S100-A4	Homo sapiens	X		1		_	extr	cyto	-	cytoplasm,cytosol,nucleus,endoplasmic reticulum,organelle lumen	regulation of biological process,cell differentiation,cellular component movement,development,cell organization and biogenesis,metabolic process,cell communication	metal ion binding,protein binding		S-100 family	EF-hand domains (2)
P26599-2		PTBP1_HUMAN	P26599-2	PTBP1	Isoform 2 of Polypyrimidine tract-binding protein 1	Homo sapiens		X	3		_	cyto_nucl	nucl	nucl	nucleus,organelle lumen	metabolic process,response to stimulus	catalytic activity,nucleotide binding,protein binding,RNA binding	Nucleus.		RRM (RNA recognition motif) domains (4)
P26641	EF1G_HUMAN	EF1G_HUMAN	P26641	EEF1G	Elongation factor 1-gamma	Homo sapiens	X	X	0		_	cyto	cyto	-	ribosome,cytoplasm,cytosol,mitochondrion,cytoskeleton	metabolic process,response to stimulus,transport	translation regulator activity,catalytic activity,nucleotide binding,protein binding,RNA binding			EF-1-gamma C-terminal domain (1); GST C-terminal domain (1); GST N-terminal domain (1)
P27348	1433T_HUMAN		P27348	YWHAQ	14-3-3 protein theta	Homo sapiens	X		0		_	cyto	cyto	cyto	cytoplasm,nucleus,organelle lumen,cytoskeleton	regulation of biological process,cell organization and biogenesis,metabolic process,transport,cell communication	catalytic activity,metal ion binding,protein binding,enzyme regulator activity	Cytoplasm.	14-3-3 family
P27635		RL10_HUMAN	P27635	RPL10	60S ribosomal protein L10	Homo sapiens		X	0		_	cyto	cyto	-	ribosome,cytoplasm,cytosol,endoplasmic reticulum	reproduction,development,cell organization and biogenesis,metabolic process	catalytic activity,structural molecule activity,metal ion binding,protein binding		Ribosomal protein L10e family
P27695		APEX1_HUMAN	P27695	APEX1	DNA-(apurinic or apyrimidinic site) lyase	Homo sapiens		X	0		_	nucl	nucl	nucl,nucl,nucl,E.R.,cyto,mito	membrane,ribosome,cytoplasm,endoplasmic reticulum,cytosol,nucleus,extracellular,mitochondrion,organelle lumen,cytoskeleton	regulation of biological process,cellular component movement,cell organization and biogenesis,cellular homeostasis,metabolic process,cell proliferation,response to stimulus,transport,cell communication	catalytic activity,transcription regulator activity,DNA binding,metal ion binding,protein binding,RNA binding,transporter activity	Nucleus. Nucleus > nucleolus. Nucleus speckle. Endoplasmic reticulum. Cytoplasm. Mitochondrion.	DNA repair enzymes AP/ExoA family
P27816-6	MAP4_HUMAN	MAP4_HUMAN	P27816-6	MAP4	Isoform 6 of Microtubule-associated protein 4	Homo sapiens	X	X	0		_	nucl	cyto	cyto	cytoplasm,cytoskeleton	regulation of biological process,cell organization and biogenesis	structural molecule activity,protein binding	Cytoplasm > cytoskeleton.		Tau/MAP repeats (4)
P27824	CALX_HUMAN		P27824	CANX	Calnexin	Homo sapiens	X		1	S	S	E.R.	cyto	E.R.,cyve	membrane,ribosome,cytoplasm,endoplasmic reticulum,extracellular,organelle lumen,cytoskeleton	regulation of biological process,development,cell organization and biogenesis,metabolic process,response to stimulus,transport,cell communication	catalytic activity,nucleotide binding,metal ion binding,protein binding,motor activity	Endoplasmic reticulum membrane; Single-pass type I membrane protein. Melanosome.	Calreticulin family
P28066	PSA5_HUMAN		P28066	PSMA5	Proteasome subunit alpha type-5	Homo sapiens	X		0		_	cyto	cyto	cyto,nucl	proteasome,cytoplasm,nucleus,cytosol,extracellular	regulation of biological process,metabolic process,cell death,response to stimulus	catalytic activity,metal ion binding,antioxidant activity,protein binding,enzyme regulator activity	Cytoplasm. Nucleus.	Peptidase T1A family
P28072	PSB6_HUMAN		P28072	PSMB6	Proteasome subunit beta type-6	Homo sapiens	X		0		_	cyto_nucl	cyto	cyto,nucl	proteasome,membrane,cytoplasm,nucleus,cytosol	regulation of biological process,metabolic process,cell death,response to stimulus,transport	catalytic activity,nucleotide binding,metal ion binding,antioxidant activity,protein binding	Cytoplasm. Nucleus.	Peptidase T1B family
P28074	PSB5_HUMAN		P28074	PSMB5	Proteasome subunit beta type-5	Homo sapiens	X		0		_	nucl	cyto	cyto,nucl	proteasome,cytoplasm,cytosol,nucleus,mitochondrion,cytoskeleton	regulation of biological process,metabolic process,cell death,response to stimulus	catalytic activity,protein binding	Cytoplasm. Nucleus.	Peptidase T1B family
P28289		TMOD1_HUMAN	P28289	TMOD1	Tropomodulin-1	Homo sapiens		X	0		_	cyto	cyto	cyto	membrane,cytoplasm,nucleus,cytosol,cytoskeleton	regulation of biological process,cell differentiation,development,cell organization and biogenesis,metabolic process,response to stimulus,transport	catalytic activity,metal ion binding,antioxidant activity,protein binding	Cytoplasm > cytoskeleton.	Tropomodulin family
P28331	NDUS1_HUMAN		P28331	NDUFS1	NADH-ubiquinone oxidoreductase 75 kDa subunit, mitochondrial	Homo sapiens	X		0		M	mito	cyto	mito	membrane,cytoplasm,mitochondrion,organelle lumen	cell differentiation,cellular homeostasis,metabolic process,cell death,transport	catalytic activity,metal ion binding,protein binding	Mitochondrion inner membrane.	Complex I 75 kDa subunit family	2Fe-2S ferredoxin-type domain (1)
P28799-2		GRN_HUMAN	P28799-2	GRN	Isoform 2 of Granulins	Homo sapiens		X	0	S	S	extr	extr	extr	cytoplasm,extracellular,mitochondrion	regulation of biological process,reproduction,development,cell proliferation,metabolic process,cell communication	catalytic activity,metal ion binding,protein binding	Secreted.	Granulin family
P29590-9		PML_HUMAN	P29590-9	PML	Isoform PML-3 of Probable transcription factor PML	Homo sapiens		X	0		_	nucl	nucl	nucl,cyto,nucl	membrane,cytoplasm,nucleus,organelle lumen	defense response,cell differentiation,regulation of biological process,development,cell organization and biogenesis,cell growth,metabolic process,cell proliferation,cell death,response to stimulus,transport	catalytic activity,transcription regulator activity,DNA binding,metal ion binding,protein binding	Nucleus > nucleoplasm. Cytoplasm. Nucleus > PML body.		B box-type zinc fingers (2); RING-type zinc finger (1)
P29692-2	EF1D_HUMAN	EF1D_HUMAN	P29692-2	EEF1D	Isoform 2 of Elongation factor 1-delta	Homo sapiens	X	X	0		_	cyto	cyto	-	cytoplasm,cytosol	regulation of biological process,metabolic process,cell communication	translation regulator activity,signal transducer activity,protein binding,enzyme regulator activity,RNA binding		EF-1-beta/EF-1-delta family
P29966	MARCS_HUMAN		P29966	MARCKS	Myristoylated alanine-rich C-kinase substrate	Homo sapiens	X		0		_	nucl	plas	cyto,plas	membrane,ribosome,cytoplasm,nucleus,extracellular,cytoskeleton	coagulation,regulation of biological process,cellular component movement,metabolic process,response to stimulus,transport,cell communication	catalytic activity,structural molecule activity,signal transducer activity,protein binding,receptor activity	Cytoplasm > cytoskeleton. Membrane; Lipid-anchor.	MARCKS family
P30048	PRDX3_HUMAN		P30048	PRDX3	Thioredoxin-dependent peroxide reductase, mitochondrial	Homo sapiens	X		0		M	mito	cyto	mito	membrane,Golgi,endosome,cytoplasm,nucleus,cytosol,extracellular,mitochondrion,vacuole,cytoskeleton	regulation of biological process,cell differentiation,development,cell organization and biogenesis,cell growth,cellular homeostasis,cell proliferation,metabolic process,cell death,response to stimulus,transport,cell communication	catalytic activity,nucleotide binding,metal ion binding,antioxidant activity,protein binding,enzyme regulator activity	Mitochondrion.	AhpC/TSA family	Thioredoxin domain (1)
P30050-2		RL12_HUMAN	P30050-2	RPL12	Isoform 2 of 60S ribosomal protein L12	Homo sapiens		X	0		_	cyto	cyto	-	ribosome,cytoplasm,cytosol	reproduction,development,cell organization and biogenesis,metabolic process	structural molecule activity,RNA binding		Ribosomal protein L11P family
P30084	ECHM_HUMAN		P30084	ECHS1	Enoyl-CoA hydratase, mitochondrial	Homo sapiens	X		0		M	mito	cyto	mito	cytoplasm,mitochondrion,organelle lumen,cell surface	regulation of biological process,metabolic process	catalytic activity,nucleotide binding,signal transducer activity,protein binding,receptor activity	Mitochondrion matrix.	Enoyl-CoA hydratase/isomerase family		Lipid metabolism; fatty acid beta-oxidation.
P30101	PDIA3_HUMAN	PDIA3_HUMAN	P30101	PDIA3	Protein disulfide-isomerase A3	Homo sapiens	X	X	1	S	S	E.R.	cyto	E.R.,cyve	membrane,cytoplasm,endoplasmic reticulum,organelle lumen	regulation of biological process,cell differentiation,cell organization and biogenesis,cellular homeostasis,metabolic process,cell death,response to stimulus,transport,cell communication	catalytic activity,nucleotide binding,DNA binding,metal ion binding,protein binding	Endoplasmic reticulum lumen. Melanosome.	Protein disulfide isomerase family	Thioredoxin domains (2)
P30153	2AAA_HUMAN	2AAA_HUMAN	P30153	PPP2R1A	Serine/threonine-protein phosphatase 2A 65 kDa regulatory subunit A alpha isoform	Homo sapiens	X	X	0		_	cyto	cyto	nucl	membrane,Golgi,endosome,cytoplasm,nucleus,cytosol,extracellular,mitochondrion,organelle lumen,cytoskeleton,chromosome	regulation of biological process,cell differentiation,development,cell organization and biogenesis,cell growth,metabolic process,cell death,response to stimulus,transport,cell communication	catalytic activity,transcription regulator activity,metal ion binding,protein binding,enzyme regulator activity	Chromosome > centromere.	Phosphatase 2A regulatory subunit A family	HEAT repeats (15)
P30443		1A01_HUMAN	P30443	HLA-A	HLA class I histocompatibility antigen, A-1 alpha chain	Homo sapiens		X	1	S	S	extr	plas	plas	membrane,Golgi,endosome,cytoplasm,extracellular,cell surface	defense response,regulation of biological process,response to stimulus	signal transducer activity,metal ion binding,protein binding,receptor activity	Membrane; Single-pass type I membrane protein.	MHC class I family	Ig-like C1-type (immunoglobulin-like) domain (1)
P30519	HMOX2_HUMAN		P30519	HMOX2	Heme oxygenase 2	Homo sapiens	X		1		_	cyto	cyto	E.R.,E.R.	membrane,cytoplasm,nucleus,endoplasmic reticulum,mitochondrion,organelle lumen	cellular homeostasis,metabolic process,response to stimulus,transport	catalytic activity,metal ion binding,protein binding	Microsome. Endoplasmic reticulum.	Heme oxygenase family	HRM (heme regulatory motif) repeats (2)
P30536-1	TSPOA_HUMAN		P30536-1	TSPO	Translocator protein	Homo sapiens	X		3		S	extr	cyto	mito	membrane,cytoplasm,mitochondrion	regulation of biological process,cell differentiation,development,cellular component movement,cell organization and biogenesis,cellular homeostasis,metabolic process,cell proliferation,cell death,response to stimulus,transport	signal transducer activity,receptor activity	Mitochondrion membrane; Multi-pass membrane protein.	TspO/BZRP family
P30837	AL1B1_HUMAN		P30837	ALDH1B1	Aldehyde dehydrogenase X, mitochondrial	Homo sapiens	X		0		M	mito	cyto	mito	cytoplasm,nucleus,mitochondrion,organelle lumen	metabolic process	catalytic activity	Mitochondrion matrix.	Aldehyde dehydrogenase family		Alcohol metabolism; ethanol degradation; acetate from ethanol: step 2/2.
P30876		RPB2_HUMAN	P30876	POLR2B	DNA-directed RNA polymerase II subunit RPB2	Homo sapiens		X	2		_	cyto	nucl	nucl	nucleus,extracellular,organelle lumen	regulation of biological process,reproduction,cell organization and biogenesis,metabolic process,response to stimulus	catalytic activity,DNA binding,metal ion binding,protein binding,RNA binding	Nucleus.	RNA polymerase beta chain family
P30988-1	CALR_HUMAN	CALR_HUMAN	P30988-1	CALCR	Calcitonin receptor	Homo sapiens	X	X	6	S	S	plas	plas	plas	membrane,cytoplasm,nucleus,cytosol,extracellular,vacuole	regulation of biological process,cell differentiation,development,cellular homeostasis,metabolic process,response to stimulus,transport,cell communication	catalytic activity,nucleotide binding,metal ion binding,signal transducer activity,protein binding,receptor activity	Cell membrane; Multi-pass membrane protein.	G-protein coupled receptor 2 family
P31040	DHSA_HUMAN		P31040	SDHA	Succinate dehydrogenase [ubiquinone] flavoprotein subunit, mitochondrial	Homo sapiens	X		0		M	mito	cyto	mito	membrane,cytoplasm,mitochondrion	development,cell organization and biogenesis,metabolic process,transport	catalytic activity,nucleotide binding,DNA binding,metal ion binding,protein binding	Mitochondrion inner membrane; Peripheral membrane protein; Matrix side.	FAD-dependent oxidoreductase 2 family, FRD/SDH subfamily		Carbohydrate metabolism; tricarboxylic acid cycle; fumarate from succinate (eukaryal route): step 1/1.
P31942-6		HNRH3_HUMAN	P31942-6	HNRNPH3	Isoform 6 of Heterogeneous nuclear ribonucleoprotein H3	Homo sapiens		X	0		_	cyto	nucl	nucl	nucleus	metabolic process	nucleotide binding,protein binding,RNA binding	Nucleus.		RRM (RNA recognition motif) domains (2)
P31943	HNRH1_HUMAN	HNRH1_HUMAN	P31943	HNRNPH1	Heterogeneous nuclear ribonucleoprotein H	Homo sapiens	X	X	0		_	nucl	nucl	nucl	spliceosomal complex,membrane,cytoplasm,nucleus,endoplasmic reticulum,cytosol,organelle lumen,chromosome,cytoskeleton	defense response,regulation of biological process,cell organization and biogenesis,cell proliferation,metabolic process,cell death,response to stimulus,transport,cell communication	catalytic activity,nucleotide binding,DNA binding,signal transducer activity,metal ion binding,protein binding,RNA binding,receptor activity	Nucleus > nucleoplasm.		RRM (RNA recognition motif) domains (3)
P31946-2		1433B_HUMAN	P31946-2	YWHAB	Isoform Short of 14-3-3 protein beta/alpha	Homo sapiens		X	1		_	cyto	cyto	cyto,cyve	cytoplasm,cytosol,nucleus,organelle lumen,cytoskeleton	cell differentiation,regulation of biological process,development,cell organization and biogenesis,metabolic process,cell death,response to stimulus,transport	catalytic activity,transcription regulator activity,protein binding	Cytoplasm. Melanosome.	14-3-3 family
P31949	S10AB_HUMAN		P31949	S100A11	Protein S100-A11	Homo sapiens	X		1		_	cyto	cyto	cyto,nucl	cytoplasm,nucleus	regulation of biological process,metabolic process,cell proliferation,transport,cell communication	metal ion binding,protein binding	Cytoplasm. Nucleus.	S-100 family	EF-hand domains (2)
P32969		RL9_HUMAN	P32969	RPL9	60S ribosomal protein L9	Homo sapiens		X	0		_	cyto	cyto	-	ribosome,cytoplasm,nucleus,cytosol,organelle lumen	regulation of biological process,cell differentiation,reproduction,development,cell organization and biogenesis,metabolic process,response to stimulus,cell communication	translation regulator activity,catalytic activity,nucleotide binding,transcription regulator activity,structural molecule activity,metal ion binding,protein binding,RNA binding		Ribosomal protein L6P family
P33176		KINH_HUMAN	P33176	KIF5B	Kinesin-1 heavy chain	Homo sapiens		X	0		_	cyto	cyto	cyto	membrane,cytoplasm,nucleus,cytosol,chromosome,cytoskeleton	regulation of biological process,cell differentiation,development,cell organization and biogenesis,metabolic process,response to stimulus,transport	catalytic activity,nucleotide binding,structural molecule activity,protein binding,enzyme regulator activity,RNA binding,motor activity	Cytoplasm > cytoskeleton.	Kinesin-like protein family, Kinesin subfamily	Kinesin-motor domain (1)
P33240-2		CSTF2_HUMAN	P33240-2	CSTF2	Isoform 2 of Cleavage stimulation factor subunit 2	Homo sapiens		X	0		_	nucl	nucl	nucl	nucleus,organelle lumen	cell organization and biogenesis,metabolic process	nucleotide binding,protein binding,RNA binding	Nucleus.		RRM (RNA recognition motif) domain (1)
P33778		H2B1B_HUMAN	P33778	HIST1H2BB	Histone H2B type 1-B	Homo sapiens		X	0		_	nucl	nucl	nucl,nucl	nucleus,chromosome	cell differentiation,cell organization and biogenesis,metabolic process	catalytic activity,DNA binding,nucleotide binding	Nucleus. Chromosome.	Histone H2B family
P34897	GLYM_HUMAN		P34897	SHMT2	Serine hydroxymethyltransferase, mitochondrial	Homo sapiens	X		1		M	mito	cyto	mito	membrane,cytoplasm,cytosol,mitochondrion,organelle lumen,cytoskeleton	regulation of biological process,cell organization and biogenesis,metabolic process,cell proliferation	catalytic activity,nucleotide binding,metal ion binding,protein binding	Mitochondrion.	SHMT family		One-carbon metabolism; tetrahydrofolate interconversion.
P34931	HS71L_HUMAN		P34931	HSPA1L	Heat shock 70 kDa protein 1-like	Homo sapiens	X		0		_	cyto	cyto	-	cytoplasm,cytosol,mitochondrion	cell organization and biogenesis,metabolic process,response to stimulus	catalytic activity,nucleotide binding,metal ion binding,protein binding		Heat shock protein 70 family
P35052	GPC1_HUMAN	GPC1_HUMAN	P35052	GPC1	Glypican-1	Homo sapiens	X	X	0	S	S	extr	plas	plas,extr	membrane,Golgi,endosome,cytoplasm,extracellular,cell surface	regulation of biological process,cell differentiation,development,cell organization and biogenesis,response to stimulus	signal transducer activity,protein binding,receptor activity	Cell membrane; Lipid-anchor > GPI-anchor; Extracellular side. Secreted > extracellular space.	Glypican family
P35221-2	CTNA1_HUMAN	CTNA1_HUMAN	P35221-2	CTNNA1	Isoform 2 of Catenin alpha-1	Homo sapiens	X	X	1		_	nucl	plas	cyto,plas,plas,plas	membrane,cytoplasm,cytosol,cytoskeleton	regulation of biological process,cell differentiation,reproduction,development,cell organization and biogenesis,cell proliferation,metabolic process,cell death,response to stimulus,cell communication	structural molecule activity,protein binding	Cytoplasm > cytoskeleton. Cell junction > adherens junction. Cell membrane; Peripheral membrane protein; Cytoplasmic side. Cell junction.	Vinculin/alpha-catenin family
P35222-2		CTNB1_HUMAN	P35222-2	CTNNB1	Isoform 2 of Catenin beta-1	Homo sapiens		X	1		_	cyto_nucl	nucl	cyto,nucl,cyto,plas	membrane,cytoplasm,nucleus,cytosol,organelle lumen,cytoskeleton	cell differentiation,regulation of biological process,reproduction,development,cell organization and biogenesis,metabolic process,cell proliferation,cell death,response to stimulus,transport,cell communication	transcription regulator activity,DNA binding,structural molecule activity,signal transducer activity,protein binding	Cytoplasm. Nucleus. Cytoplasm > cytoskeleton. Cell junction > adherens junction.	Beta-catenin family	ARM repeats (12)
P35232	PHB_HUMAN		P35232	PHB	Prohibitin	Homo sapiens	X		0	S	_	cyto	nucl	mito	membrane,cytoplasm,nucleus,mitochondrion,organelle lumen	cell differentiation,regulation of biological process,cell organization and biogenesis,cell proliferation,metabolic process,cell death,cell communication	transcription regulator activity,protein binding	Mitochondrion inner membrane.	Prohibitin family
P35268	RL22_HUMAN	RL22_HUMAN	P35268	RPL22	60S ribosomal protein L22	Homo sapiens	X	X	0		_	nucl	nucl	-	ribosome,cytoplasm,nucleus,cytosol	cell differentiation,regulation of biological process,reproduction,development,cell organization and biogenesis,metabolic process,response to stimulus,transport,cell communication	translation regulator activity,catalytic activity,DNA binding,nucleotide binding,transcription regulator activity,structural molecule activity,metal ion binding,protein binding,RNA binding		Ribosomal protein L22e family
P35527		K1C9_HUMAN	P35527	KRT9	Keratin, type I cytoskeletal 9	Homo sapiens		X	0		M	nucl	cyto	-	membrane,cytoplasm,cytoskeleton	reproduction,development,cell organization and biogenesis,metabolic process	nucleotide binding,structural molecule activity,protein binding		Intermediate filament family
P35555	FBN1_HUMAN	FBN1_HUMAN	P35555	FBN1	Fibrillin-1	Homo sapiens	X	X	0	S	S	nucl	extr	extr	membrane,extracellular	coagulation,regulation of biological process,development,metabolic process,response to stimulus,cell communication	structural molecule activity,signal transducer activity,metal ion binding,protein binding,receptor activity	Secreted > extracellular space > extracellular matrix.	Fibrillin family	EGF-like domains (47); TB (TGF-beta binding) domains (9)
P35579-2	MYH9_HUMAN	MYH9_HUMAN	P35579-2	MYH9	Isoform 2 of Myosin-9	Homo sapiens	X	X	1		_	cyto_nucl	cyto	-	membrane,cytoplasm,nucleus,cytosol,cytoskeleton	cell division,cell differentiation,cellular component movement,development,cell organization and biogenesis,metabolic process,response to stimulus,transport	catalytic activity,nucleotide binding,protein binding,motor activity,transporter activity			IQ domain (1); Myosin head-like domain (1)
P35580-3		MYH10_HUMAN	P35580-3	MYH10	Isoform 3 of Myosin-10	Homo sapiens		X	2		_	cyto	cyto	-	membrane,cytoplasm,cytoskeleton	cell division,cell differentiation,regulation of biological process,development,cellular component movement,cell organization and biogenesis,cell proliferation,metabolic process,response to stimulus,transport,cell communication	catalytic activity,nucleotide binding,structural molecule activity,protein binding,enzyme regulator activity,motor activity,transporter activity			IQ domain (1); Myosin head-like domain (1)
P35609	ACTN2_HUMAN	ACTN2_HUMAN	P35609	ACTN2	Alpha-actinin-2	Homo sapiens	X	X	1		_	cyto_nucl	nucl	cyto	membrane,cytoplasm,nucleus,cytosol,extracellular,organelle lumen,cytoskeleton	coagulation,cell differentiation,regulation of biological process,development,cell organization and biogenesis,metabolic process,cell death,response to stimulus,transport,cell communication	nucleotide binding,transcription regulator activity,structural molecule activity,metal ion binding,signal transducer activity,protein binding	Cytoplasm > myofibril > sarcomere > Z-disk.	Alpha-actinin family	Actin-binding domain (1); CH (calponin-homology) domains (2); EF-hand domains (2); Spectrin repeats (4)
P35611-3		ADDA_HUMAN	P35611-3	ADD1	Isoform 3 of Alpha-adducin	Homo sapiens		X	0		_	nucl	cyto	cyto,plas	membrane,cytoplasm,nucleus,cytosol,cytoskeleton	cell differentiation,regulation of biological process,development,cell organization and biogenesis,cellular homeostasis,metabolic process,cell death	structural molecule activity,metal ion binding,protein binding	Cytoplasm > cytoskeleton. Cell membrane; Peripheral membrane protein; Cytoplasmic side.	Aldolase class II family, Adducin subfamily
P35637-2	FUS_HUMAN	FUS_HUMAN	P35637-2	FUS	Isoform Short of RNA-binding protein FUS	Homo sapiens	X	X	0		_	nucl	nucl	nucl	cytoplasm,nucleus,organelle lumen	regulation of biological process,metabolic process,cell death	transcription regulator activity,nucleotide binding,DNA binding,metal ion binding,protein binding,RNA binding	Nucleus.	RRM TET family	RanBP2-type zinc finger (1); RRM (RNA recognition motif) domain (1)
P35659		DEK_HUMAN	P35659	DEK	Protein DEK	Homo sapiens		X	0		_	nucl	nucl	nucl	membrane,cytoplasm,nucleus	regulation of biological process,reproduction,development,cell organization and biogenesis,metabolic process,response to stimulus,transport,cell communication	catalytic activity,transcription regulator activity,nucleotide binding,DNA binding,metal ion binding,protein binding,RNA binding	Nucleus.		SAP domain (1)
P35711-4		SOX5_HUMAN	P35711-4	SOX5	Isoform 4 of Transcription factor SOX-5	Homo sapiens		X	1		_	nucl	nucl	nucl	nucleus	cell differentiation,regulation of biological process,development,metabolic process	nucleotide binding,DNA binding,protein binding	Nucleus.		HMG box DNA-binding domain (1)
P35908		K22E_HUMAN	P35908	KRT2	Keratin, type II cytoskeletal 2 epidermal	Homo sapiens		X	0		_	nucl	cyto	-	membrane,Golgi,cytoplasm,cytoskeleton	cell differentiation,cellular component movement,development,cell organization and biogenesis,metabolic process,cell proliferation,transport	structural molecule activity,protein binding		Intermediate filament family
P35998	PRS7_HUMAN	PRS7_HUMAN	P35998	PSMC2	26S protease regulatory subunit 7	Homo sapiens	X	X	0		_	cyto	nucl	cyto,nucl	proteasome,spliceosomal complex,cytoplasm,cytosol,nucleus,mitochondrion,organelle lumen	regulation of biological process,metabolic process,cell death,response to stimulus,transport	catalytic activity,DNA binding,nucleotide binding,protein binding,transporter activity	Cytoplasm. Nucleus.	AAA ATPase family
P36542-2	ATPG_HUMAN		P36542-2	ATP5C1	Isoform Heart of ATP synthase subunit gamma, mitochondrial	Homo sapiens	X		0		M	mito	cyto	mito,mito	membrane,cytoplasm,mitochondrion,organelle lumen	metabolic process,transport	catalytic activity,metal ion binding,transporter activity	Mitochondrion. Mitochondrion inner membrane; Peripheral membrane protein.	ATPase gamma chain family
P36578	RL4_HUMAN	RL4_HUMAN	P36578	RPL4	60S ribosomal protein L4	Homo sapiens	X	X	0		_	cyto	cyto	-	ribosome,cytoplasm,cytosol,nucleus,organelle lumen	regulation of biological process,reproduction,development,cell organization and biogenesis,metabolic process,response to stimulus,transport,cell communication	translation regulator activity,catalytic activity,transcription regulator activity,DNA binding,nucleotide binding,structural molecule activity,metal ion binding,protein binding,RNA binding		Ribosomal protein L4P family
P37108	SRP14_HUMAN	SRP14_HUMAN	P37108	SRP14	Signal recognition particle 14 kDa protein	Homo sapiens	X	X	0		_	cyto	cyto	cyto	membrane,ribosome,cytoplasm,nucleus,cytosol,endoplasmic reticulum,organelle lumen	regulation of biological process,cell organization and biogenesis,metabolic process,response to stimulus,transport	catalytic activity,transcription regulator activity,nucleotide binding,structural molecule activity,protein binding,RNA binding,transporter activity	Cytoplasm.	SRP14 family
P37802	TAGL2_HUMAN		P37802	TAGLN2	Transgelin-2	Homo sapiens	X		0		_	cyto_nucl	cyto	-	membrane,nucleus,organelle lumen,cytoskeleton	regulation of biological process,development,cell organization and biogenesis,metabolic process	catalytic activity,transcription regulator activity,DNA binding,nucleotide binding,metal ion binding,protein binding		Calponin family	Calponin-like repeat (1); CH (calponin-homology) domain (1)
P37837	TALDO_HUMAN		P37837	TALDO1	Transaldolase	Homo sapiens	X		2		_	mito	cyto	cyto	membrane,cytoplasm,cytosol,extracellular	defense response,development,metabolic process,response to stimulus	catalytic activity,protein binding	Cytoplasm.	Transaldolase family, Type 1 subfamily		Carbohydrate degradation; pentose phosphate pathway; D-glyceraldehyde 3-phosphate and beta-D-fructose 6-phosphate from D-ribose 5-phosphate and D-xylulose 5-phosphate (non-oxidative stage): step 2/3.
P38159	HNRPG_HUMAN	HNRPG_HUMAN	P38159	RBMX	Heterogeneous nuclear ribonucleoprotein G	Homo sapiens	X	X	0		_	nucl	nucl	nucl	spliceosomal complex,nucleus,organelle lumen	metabolic process	nucleotide binding,protein binding,RNA binding	Nucleus.		RRM (RNA recognition motif) domain (1)
P38606	VATA_HUMAN		P38606	ATP6V1A	V-type proton ATPase catalytic subunit A	Homo sapiens	X		0		_	cyto	cyto	-	membrane,cytoplasm,cytosol,mitochondrion	cellular homeostasis,metabolic process,response to stimulus,transport	catalytic activity,nucleotide binding,metal ion binding,transporter activity		ATPase alpha/beta chains family
P38646	GRP75_HUMAN		P38646	HSPA9	Stress-70 protein, mitochondrial	Homo sapiens	X		0		M	mito	cyto	mito	membrane,cytoplasm,mitochondrion,organelle lumen,cell surface	regulation of biological process,cell differentiation,cell organization and biogenesis,metabolic process,cell death,response to stimulus,transport	nucleotide binding,signal transducer activity,metal ion binding,protein binding,receptor activity	Mitochondrion.	Heat shock protein 70 family
P38919		DDX48_HUMAN	P38919	EIF4A3	Eukaryotic initiation factor 4A-III	Homo sapiens		X	0		_	nucl	nucl	nucl,nucl,cyto	spliceosomal complex,cytoplasm,cytosol,nucleus,organelle lumen	regulation of biological process,cell organization and biogenesis,metabolic process,transport	catalytic activity,nucleotide binding,DNA binding,protein binding,RNA binding	Nucleus. Nucleus speckle. Cytoplasm.	DEAD box helicase family, eIF4A subfamily	Helicase ATP-binding domain (1); Helicase C-terminal domain (1)
P39019	RS19_HUMAN	RS19_HUMAN	P39019	RPS19	40S ribosomal protein S19	Homo sapiens	X	X	0		_	cyto	cyto	nucl	membrane,ribosome,cytoplasm,cytosol,nucleus,organelle lumen	regulation of biological process,cell differentiation,reproduction,cellular component movement,development,cell organization and biogenesis,metabolic process,response to stimulus,transport,cell communication	translation regulator activity,catalytic activity,DNA binding,structural molecule activity,metal ion binding,protein binding,RNA binding	Nucleus.	Ribosomal protein S19e family
P39023	RL3_HUMAN	RL3_HUMAN	P39023	RPL3	60S ribosomal protein L3	Homo sapiens	X	X	0		M	cyto	cyto	cyto	ribosome,cytoplasm,nucleus,cytosol,organelle lumen	regulation of biological process,reproduction,development,cell organization and biogenesis,metabolic process,response to stimulus,transport,cell communication	translation regulator activity,catalytic activity,nucleotide binding,DNA binding,structural molecule activity,metal ion binding,protein binding,RNA binding	Cytoplasm.	Ribosomal protein L3P family
P39656	OST48_HUMAN		P39656	DDOST	Dolichyl-diphosphooligosaccharide--protein glycosyltransferase 48 kDa subunit	Homo sapiens	X		1	S	M	plas	cyto	E.R.	membrane,cytoplasm,endoplasmic reticulum,extracellular	defense response,metabolic process,response to stimulus	catalytic activity,protein binding	Endoplasmic reticulum membrane; Single-pass type I membrane protein.	DDOST 48 kDa subunit family		Protein modification; protein glycosylation.
P40123	CAP2_HUMAN		P40123	CAP2	Adenylyl cyclase-associated protein 2	Homo sapiens	X		0		_	cyto	plas	plas	membrane	regulation of biological process,cell differentiation,development,cell organization and biogenesis,metabolic process,response to stimulus,cell communication	catalytic activity,metal ion binding,protein binding	Cell membrane; Peripheral membrane protein.	CAP family	C-CAP/cofactor C-like domain (1)
P40227	TCPZ_HUMAN	TCPZ_HUMAN	P40227	CCT6A	T-complex protein 1 subunit zeta	Homo sapiens	X	X	2		_	cyto	cyto	cyto	membrane,cytoplasm,nucleus,cytosol,mitochondrion,organelle lumen,cytoskeleton,chromosome	regulation of biological process,cell organization and biogenesis,metabolic process	transcription regulator activity,DNA binding,nucleotide binding,metal ion binding,protein binding,RNA binding	Cytoplasm.	TCP-1 chaperonin family
P40926	MDHM_HUMAN		P40926	MDH2	Malate dehydrogenase, mitochondrial	Homo sapiens	X		1		M	mito	cyto	mito	membrane,cytoplasm,cytosol,nucleus,mitochondrion,organelle lumen,chromosome	cell division,regulation of biological process,cell organization and biogenesis,metabolic process	catalytic activity,structural molecule activity,protein binding	Mitochondrion matrix.	LDH/MDH superfamily, MDH type 1 family
P40939	ECHA_HUMAN	ECHA_HUMAN	P40939	HADHA	Trifunctional enzyme subunit alpha, mitochondrial	Homo sapiens	X	X	1		M	mito	cyto	mito	membrane,cytoplasm,nucleus,extracellular,mitochondrion,organelle lumen	metabolic process,response to stimulus,transport	catalytic activity,nucleotide binding,metal ion binding,protein binding,transporter activity	Mitochondrion.	Enoyl-CoA hydratase/isomerase family; 3-hydroxyacyl-CoA dehydrogenase family		Lipid metabolism; fatty acid beta-oxidation.
P41091		IF2G_HUMAN	P41091	EIF2S3	Eukaryotic translation initiation factor 2 subunit 3	Homo sapiens		X	1		_	cyto	cyto	-	ribosome,cytoplasm,cytosol	regulation of biological process,cell differentiation,cell organization and biogenesis,metabolic process,cell communication	translation regulator activity,catalytic activity,nucleotide binding,protein binding,RNA binding		GTP-binding elongation factor family, EIF2G subfamily
P41252	SYIC_HUMAN		P41252	IARS	Isoleucyl-tRNA synthetase, cytoplasmic	Homo sapiens	X		3		_	cyto	cyto	cyto	membrane,cytoplasm,cytosol,nucleus,organelle lumen	metabolic process	catalytic activity,nucleotide binding,metal ion binding,protein binding,RNA binding	Cytoplasm.	Class-I aminoacyl-tRNA synthetase family
P42167-2		LAP2B_HUMAN	P42167-2	TMPO	Isoform Gamma of Lamina-associated polypeptide 2, isoforms beta/gamma	Homo sapiens		X	1		_	cyto	nucl	nucl	membrane,nucleus,chromosome	regulation of biological process,metabolic process	DNA binding,protein binding	Nucleus inner membrane; Single-pass type II membrane protein.	LEM family	LEM domain (1); LEM-like domain (1)
P42224-2		STAT1_HUMAN	P42224-2	STAT1	Isoform Beta of Signal transducer and activator of transcription 1-alpha/beta	Homo sapiens		X	0		_	nucl	nucl	cyto,nucl	cytoplasm,nucleus,cytosol,organelle lumen	regulation of biological process,cell proliferation,metabolic process,cell death,response to stimulus,transport,cell communication	DNA binding,transcription regulator activity,metal ion binding,signal transducer activity,protein binding	Cytoplasm. Nucleus.	Transcription factor STAT family	SH2 domain (1)
P42765	THIM_HUMAN		P42765	ACAA2	3-ketoacyl-CoA thiolase, mitochondrial	Homo sapiens	X		0		M	mito	cyto	mito	membrane,cytoplasm,mitochondrion,organelle lumen	defense response,regulation of biological process,metabolic process,cell death,response to stimulus	catalytic activity,metal ion binding,protein binding	Mitochondrion.	Thiolase family		Lipid metabolism; fatty acid metabolism.
P42766		RL35_HUMAN	P42766	RPL35	60S ribosomal protein L35	Homo sapiens		X	0		_	cyto	cyto	-	ribosome,cytoplasm,cytosol,nucleus,organelle lumen	cell differentiation,regulation of biological process,reproduction,development,cell organization and biogenesis,metabolic process,response to stimulus,cell communication	translation regulator activity,catalytic activity,nucleotide binding,transcription regulator activity,structural molecule activity,metal ion binding,protein binding,RNA binding		Ribosomal protein L29P family
P43243	MATR3_HUMAN	MATR3_HUMAN	P43243	MATR3	Matrin-3	Homo sapiens	X	X	0	S	M	nucl	nucl	nucl	membrane,nucleus,extracellular,organelle lumen	defense response,regulation of biological process,metabolic process,response to stimulus	catalytic activity,nucleotide binding,structural molecule activity,metal ion binding,protein binding,RNA binding	Nucleus matrix.		Matrin-type zinc finger (1); RRM (RNA recognition motif) domains (2)
P43686-2		PRS6B_HUMAN	P43686-2	PSMC4	Isoform 2 of 26S protease regulatory subunit 6B	Homo sapiens		X	0		_	cyto	nucl	cyto,nucl	proteasome,cytoplasm,nucleus,cytosol,mitochondrion,organelle lumen	regulation of biological process,reproduction,development,metabolic process,cell death,response to stimulus	catalytic activity,nucleotide binding,protein binding	Cytoplasm. Nucleus.	AAA ATPase family
P45378-7	TNNT3_HUMAN	TNNT3_HUMAN	P45378-7	TNNT3	Isoform 7 of Troponin T, fast skeletal muscle	Homo sapiens	X	X	0		_	cyto_nucl	-	-	cytoplasm,cytosol,cytoskeleton	regulation of biological process,metabolic process,transport	catalytic activity,protein binding		Troponin T family
P45379-9	TNNT2_HUMAN	TNNT2_HUMAN	P45379-9	TNNT2	Isoform 9 of Troponin T, cardiac muscle	Homo sapiens	X	X	0		_	nucl	cyto	-	cytoplasm,cytosol,cytoskeleton	cell differentiation,regulation of biological process,development,cell organization and biogenesis,metabolic process,response to stimulus,transport	catalytic activity,structural molecule activity,protein binding		Troponin T family
P45880-2	VDAC2_HUMAN		P45880-2	VDAC2	Isoform 2 of Voltage-dependent anion-selective channel protein 2	Homo sapiens	X		0		_	cyto	cyto	mito	membrane,cytoplasm,mitochondrion,organelle lumen	regulation of biological process,transport	nucleotide binding,protein binding,transporter activity	Mitochondrion outer membrane.	Eukaryotic mitochondrial porin family
P46063		RECQ1_HUMAN	P46063	RECQL	ATP-dependent DNA helicase Q1	Homo sapiens		X	3		_	cyto	nucl	nucl	cytoplasm,nucleus	metabolic process,response to stimulus,cell communication	catalytic activity,nucleotide binding,DNA binding,protein binding	Nucleus.	Helicase family, RecQ subfamily	Helicase ATP-binding domain (1); Helicase C-terminal domain (1)
P46087-2		NOL1_HUMAN	P46087-2	NOP2	Isoform 2 of Putative ribosomal RNA methyltransferase NOP2	Homo sapiens		X	0		_	nucl	nucl	nucl	nucleus,organelle lumen	regulation of biological process,metabolic process,cell proliferation	catalytic activity,protein binding,RNA binding	Nucleus > nucleolus.	Methyltransferase superfamily, RsmB/NOP family
P46459	NSF_HUMAN		P46459	NSF	Vesicle-fusing ATPase	Homo sapiens	X		1		_	cyto	cyto	cyto	Golgi,cytoplasm,endoplasmic reticulum,cytosol	regulation of biological process,cell organization and biogenesis,metabolic process,transport,cell communication	catalytic activity,nucleotide binding,metal ion binding,protein binding,RNA binding	Cytoplasm.	AAA ATPase family
P46776	RL27A_HUMAN	RL27A_HUMAN	P46776	RPL27A	60S ribosomal protein L27a	Homo sapiens	X	X	0		_	cyto	nucl	-	ribosome,cytoplasm,cytosol	regulation of biological process,reproduction,development,cell organization and biogenesis,metabolic process	catalytic activity,nucleotide binding,structural molecule activity,metal ion binding,protein binding,RNA binding		Ribosomal protein L15P family
P46777	RL5_HUMAN	RL5_HUMAN	P46777	RPL5	60S ribosomal protein L5	Homo sapiens	X	X	0		_	nucl	cyto	cyto,nucl	ribosome,cytoplasm,nucleus,cytosol,organelle lumen	regulation of biological process,cell differentiation,reproduction,development,cell organization and biogenesis,metabolic process,response to stimulus,transport,cell communication	translation regulator activity,catalytic activity,nucleotide binding,DNA binding,transcription regulator activity,structural molecule activity,metal ion binding,protein binding,RNA binding	Cytoplasm. Nucleus > nucleolus.	Ribosomal protein L18P family
P46778		RL21_HUMAN	P46778	RPL21	60S ribosomal protein L21	Homo sapiens		X	0		_	nucl	cyto	-	ribosome,cytoplasm,cytosol	regulation of biological process,reproduction,development,cell organization and biogenesis,metabolic process,response to stimulus,transport,cell communication	translation regulator activity,catalytic activity,nucleotide binding,DNA binding,structural molecule activity,metal ion binding,protein binding,RNA binding		Ribosomal protein L21e family
P46781	RS9_HUMAN		P46781	RPS9	40S ribosomal protein S9	Homo sapiens	X		0		M	cyto	cyto	cyto	membrane,ribosome,cytoplasm,cytosol,nucleus,organelle lumen	regulation of biological process,reproduction,development,cell organization and biogenesis,cell proliferation,metabolic process,response to stimulus	translation regulator activity,catalytic activity,DNA binding,nucleotide binding,structural molecule activity,metal ion binding,protein binding,RNA binding	Cytoplasm.	Ribosomal protein S4P family	S4 RNA-binding domain (1)
P46782		RS5_HUMAN	P46782	RPS5	40S ribosomal protein S5	Homo sapiens		X	0		_	cyto	cyto	-	membrane,ribosome,cytoplasm,nucleus,cytosol,mitochondrion,organelle lumen	regulation of biological process,reproduction,development,cell organization and biogenesis,metabolic process,response to stimulus,transport	translation regulator activity,catalytic activity,DNA binding,nucleotide binding,structural molecule activity,metal ion binding,protein binding,RNA binding		Ribosomal protein S7P family
P46783	RS10_HUMAN		P46783	RPS10	40S ribosomal protein S10	Homo sapiens	X		0		_	nucl	cyto	cyto,nucl	membrane,ribosome,cytoplasm,cytosol,nucleus,organelle lumen	regulation of biological process,reproduction,development,cell organization and biogenesis,metabolic process,response to stimulus	translation regulator activity,catalytic activity,DNA binding,structural molecule activity,metal ion binding,protein binding,RNA binding	Cytoplasm. Nucleus > nucleolus.	Ribosomal protein S10e family
P46821		MAP1B_HUMAN	P46821	MAP1B	Microtubule-associated protein 1B	Homo sapiens		X	2		_	nucl	cyto	cyto	membrane,cytoplasm,cytosol,cytoskeleton	regulation of biological process,cell differentiation,development,cell organization and biogenesis,cell growth,metabolic process,response to stimulus,cell communication	nucleotide binding,structural molecule activity,protein binding	Cytoplasm > cytoskeleton.	MAP1 family
P46939		UTRO_HUMAN	P46939	UTRN	Utrophin	Homo sapiens		X	1		_	nucl	plas	plas,cyto	membrane,cytoplasm,nucleus,organelle lumen,cytoskeleton	cell differentiation,regulation of biological process,development,cell organization and biogenesis,metabolic process,response to stimulus,transport	structural molecule activity,metal ion binding,signal transducer activity,protein binding,transporter activity,receptor activity	Cell junction > synapse > postsynaptic cell membrane; Peripheral membrane protein; Cytoplasmic side. Cytoplasm > cytoskeleton.		CH (calponin-homology) domains (2); Spectrin repeats (20); WW domain (1); ZZ-type zinc finger (1)
P46940		IQGA1_HUMAN	P46940	IQGAP1	Ras GTPase-activating-like protein IQGAP1	Homo sapiens		X	1		_	cyto	cyto	plas	membrane,Golgi,cytoplasm,nucleus,cytosol,extracellular,mitochondrion,organelle lumen,cytoskeleton	coagulation,regulation of biological process,reproduction,development,metabolic process,response to stimulus,transport,cell communication	catalytic activity,DNA binding,transcription regulator activity,nucleotide binding,metal ion binding,protein binding,enzyme regulator activity	Cell membrane.		CH (calponin-homology) domain (1); IQ domains (4); Ras-GAP domain (1); WW domain (1)
P47755		CAZA2_HUMAN	P47755	CAPZA2	F-actin-capping protein subunit alpha-2	Homo sapiens		X	0		_	cyto	cyto	-	membrane,cytoplasm,cytosol,extracellular,mitochondrion,cytoskeleton	defense response,coagulation,regulation of biological process,cell differentiation,development,metabolic process,transport,cell communication,reproduction,cellular component movement,cell organization and biogenesis,cell proliferation,response to stimulus	catalytic activity,metal ion binding,antioxidant activity,protein binding		F-actin-capping protein alpha subunit family
P47756-2		CAPZB_HUMAN	P47756-2	CAPZB	Isoform 2 of F-actin-capping protein subunit beta	Homo sapiens		X	0		_	cyto_nucl	cyto	cyto	membrane,cytoplasm,cytosol,cytoskeleton	coagulation,regulation of biological process,cellular component movement,cell organization and biogenesis,metabolic process,response to stimulus	catalytic activity,protein binding	Cytoplasm > cytoskeleton.	F-actin-capping protein beta subunit family
P47914	RL29_HUMAN	RL29_HUMAN	P47914	RPL29	60S ribosomal protein L29	Homo sapiens	X	X	0		_	nucl	cyto	-	ribosome,cytoplasm,cytosol	regulation of biological process,reproduction,development,cell organization and biogenesis,metabolic process,response to stimulus,transport,cell communication	translation regulator activity,catalytic activity,nucleotide binding,DNA binding,structural molecule activity,metal ion binding,protein binding,RNA binding		Ribosomal protein L29e family
P48047	ATPO_HUMAN		P48047	ATP5O	ATP synthase subunit O, mitochondrial	Homo sapiens	X		0		M	mito	cyto	mito,mito	membrane,cytoplasm,mitochondrion,organelle lumen	metabolic process,transport	catalytic activity,metal ion binding,protein binding,transporter activity	Mitochondrion. Mitochondrion inner membrane.	ATPase delta chain family
P48059		PINC_HUMAN	P48059	LIMS1	LIM and senescent cell antigen-like-containing domain protein 1	Homo sapiens		X	0		_	nucl	plas	plas,plas	membrane,cytoplasm,nucleus,cytosol	regulation of biological process,development,cell organization and biogenesis,metabolic process,response to stimulus	catalytic activity,DNA binding,metal ion binding,antioxidant activity,protein binding	Cell junction > focal adhesion. Cell membrane; Peripheral membrane protein; Cytoplasmic side.		LIM zinc-binding domains (5)
P48643	TCPE_HUMAN	TCPE_HUMAN	P48643	CCT5	T-complex protein 1 subunit epsilon	Homo sapiens	X	X	0		_	cyto	cyto	cyto,cyto	cytoplasm,cytosol,nucleus,organelle lumen,cytoskeleton	metabolic process,response to stimulus	nucleotide binding,protein binding	Cytoplasm. Cytoplasm > cytoskeleton > centrosome.	TCP-1 chaperonin family
P48681	NEST_HUMAN	NEST_HUMAN	P48681	NES	Nestin	Homo sapiens	X	X	0		_	nucl	cyto	-	cytoplasm,cytoskeleton	regulation of biological process,development,cell organization and biogenesis,cell proliferation,cell death,response to stimulus	nucleotide binding,structural molecule activity,protein binding		Intermediate filament family
P48735	IDHP_HUMAN	IDHP_HUMAN	P48735	IDH2	Isocitrate dehydrogenase [NADP], mitochondrial	Homo sapiens	X	X	0		M	mito	cyto	mito	membrane,cytoplasm,mitochondrion,organelle lumen	metabolic process	catalytic activity,nucleotide binding,metal ion binding	Mitochondrion.	Isocitrate and isopropylmalate dehydrogenases family
P49023-4		PAXI_HUMAN	P49023-4	PXN	Isoform 4 of Paxillin	Homo sapiens		X	0		_	nucl	cyto	cyto,plas	membrane,cytoplasm,cytoskeleton	regulation of biological process,cellular component movement,development,cell organization and biogenesis,metabolic process,response to stimulus,cell communication	metal ion binding,protein binding	Cytoplasm > cytoskeleton. Cell junction > focal adhesion.	Paxillin family	LIM zinc-binding domains (4)
P49327	FAS_HUMAN	FAS_HUMAN	P49327	FASN	Fatty acid synthase	Homo sapiens	X	X	5		_	cyto	cyto	cyto,cyve	membrane,Golgi,cytoplasm,cytosol,mitochondrion	regulation of biological process,metabolic process	catalytic activity,metal ion binding,protein binding,transporter activity	Cytoplasm. Melanosome.		Acyl carrier domain (1)
P49368	TCPG_HUMAN	TCPG_HUMAN	P49368	CCT3	T-complex protein 1 subunit gamma	Homo sapiens	X	X	0		M	mito	cyto	cyto	membrane,cytoplasm,nucleus,cytosol,extracellular,cytoskeleton	coagulation,regulation of biological process,metabolic process,response to stimulus,transport	catalytic activity,DNA binding,nucleotide binding,transcription regulator activity,metal ion binding,protein binding,enzyme regulator activity,RNA binding	Cytoplasm.	TCP-1 chaperonin family
P49411	EFTU_HUMAN	EFTU_HUMAN	P49411	TUFM	Elongation factor Tu, mitochondrial	Homo sapiens	X	X	1		M	mito	cyto	mito	cytoplasm,mitochondrion,organelle lumen	metabolic process	translation regulator activity,catalytic activity,nucleotide binding,protein binding,RNA binding	Mitochondrion.	GTP-binding elongation factor family, EF-Tu/EF-1A subfamily
P49458		SRP09_HUMAN	P49458	SRP9P1	Signal recognition particle 9 kDa protein	Homo sapiens		X	0		_	cyto	cyto	cyto	membrane,cytoplasm,endoplasmic reticulum,cytosol,nucleus,extracellular	regulation of biological process,development,cell organization and biogenesis,cellular homeostasis,metabolic process,transport	catalytic activity,nucleotide binding,transcription regulator activity,metal ion binding,antioxidant activity,protein binding,RNA binding	Cytoplasm.	SRP9 family
P49750-3		YLPM1_HUMAN	P49750-3	YLPM1	Isoform 3 of YLP motif-containing protein 1	Homo sapiens		X	0		_	nucl	nucl	nucl,nucl	nucleus,organelle lumen	regulation of biological process,metabolic process	catalytic activity,RNA binding	Nucleus. Nucleus speckle.
P49755	TMEDA_HUMAN		P49755	TMED10	Transmembrane emp24 domain-containing protein 10	Homo sapiens	X		1	S	S	extr	cyto	golg,cyve	membrane,Golgi,cytoplasm	cell organization and biogenesis,transport	protein binding	Golgi apparatus membrane; Single-pass type I membrane protein; Lumenal side. Melanosome.	EMP24/GP25L family	GOLD domain (1)
P49773		HINT1_HUMAN	P49773	HINT1	Histidine triad nucleotide-binding protein 1	Homo sapiens		X	0		_	cyto	nucl	cyto,nucl	cytoplasm,nucleus,cytoskeleton	regulation of biological process,metabolic process,cell communication	catalytic activity,metal ion binding,protein binding	Cytoplasm. Nucleus.	HINT family	HIT domain (1)
P50402		EMD_HUMAN	P50402	EMD	Emerin	Homo sapiens		X	1		_	mito	nucl	nucl,nucl	membrane,cytoplasm,endoplasmic reticulum,cytosol,nucleus,extracellular,organelle lumen,chromosome,cytoskeleton	regulation of biological process,reproduction,development,cell organization and biogenesis,cell proliferation,metabolic process,response to stimulus,transport	catalytic activity,DNA binding,metal ion binding,protein binding	Nucleus inner membrane; Single-pass membrane protein; Nucleoplasmic side. Nucleus outer membrane.		LEM domain (1)
P50454	SERPH_HUMAN		P50454	SERPINH1	Serpin H1	Homo sapiens	X		1	S	S	extr	extr	E.R.	cytoplasm,endoplasmic reticulum,extracellular,organelle lumen	cell organization and biogenesis,metabolic process,response to stimulus,transport	catalytic activity,nucleotide binding,protein binding,enzyme regulator activity,transporter activity	Endoplasmic reticulum lumen.	Serpin family
P50479-2	PDLI4_HUMAN	PDLI4_HUMAN	P50479-2	PDLIM4	Isoform 2 of PDZ and LIM domain protein 4	Homo sapiens	X	X	0		M	nucl	cyto	-			metal ion binding,protein binding			LIM zinc-binding domain (1); PDZ (DHR) domain (1)
P50552		VASP_HUMAN	P50552	VASP	Vasodilator-stimulated phosphoprotein	Homo sapiens		X	0		_	nucl	plas	cyto,cyto,plas,plas,plas	membrane,cytoplasm,nucleus,cytosol,extracellular,vacuole,cytoskeleton	coagulation,cell division,cell differentiation,regulation of biological process,cellular component movement,development,cell organization and biogenesis,metabolic process,cell death,response to stimulus,transport,cell communication	catalytic activity,nucleotide binding,structural molecule activity,signal transducer activity,protein binding,transporter activity,receptor activity	Cytoplasm. Cytoplasm > cytoskeleton. Cell junction > focal adhesion. Cell projection > lamellipodium membrane. Cell projection > filopodium membrane.	Ena/VASP family	WH1 domain (1)
P50570-2		DYN2_HUMAN	P50570-2	DNM2	Isoform 2 of Dynamin-2	Homo sapiens		X	0		_	cyto	plas	cyto,cyto,plas,plas	membrane,Golgi,cytoplasm,cytosol,cytoskeleton	regulation of biological process,cell organization and biogenesis,metabolic process,cell death,transport	catalytic activity,nucleotide binding,transcription regulator activity,protein binding,motor activity	Cytoplasm. Cytoplasm > cytoskeleton. Cell junction > synapse > postsynaptic cell membrane > postsynaptic density. Cell junction > synapse.	Dynamin family	GED domain (1); PH domain (1)
P50895	BCAM_HUMAN		P50895	BCAM	Basal cell adhesion molecule	Homo sapiens	X		1	S	S	extr	plas	plas	membrane,cytoplasm,cell surface	regulation of biological process,metabolic process,cell communication	catalytic activity,nucleotide binding,signal transducer activity,metal ion binding,protein binding,receptor activity	Membrane; Single-pass type I membrane protein.		Ig-like C2-type (immunoglobulin-like) domains (3); Ig-like V-type (immunoglobulin-like) domains (2)
P50914	RL14_HUMAN	RL14_HUMAN	P50914	RPL14	60S ribosomal protein L14	Homo sapiens	X	X	0		M	mito	cyto	-	ribosome,cytoplasm,nucleus,cytosol,chromosome	reproduction,development,cell organization and biogenesis,metabolic process,response to stimulus	catalytic activity,DNA binding,structural molecule activity,protein binding,RNA binding		Ribosomal protein L14e family
P50990	TCPQ_HUMAN	TCPQ_HUMAN	P50990	CCT8	T-complex protein 1 subunit theta	Homo sapiens	X	X	1		_	cyto	cyto	cyto,cyto	cytoplasm,cytosol,nucleus,cytoskeleton	metabolic process	catalytic activity,nucleotide binding,protein binding	Cytoplasm. Cytoplasm > cytoskeleton > centrosome.	TCP-1 chaperonin family
P50991	TCPD_HUMAN	TCPD_HUMAN	P50991	CCT4	T-complex protein 1 subunit delta	Homo sapiens	X	X	2		_	cyto	cyto	cyto,cyve,cyto	cytoplasm,cytosol,nucleus,organelle lumen,cytoskeleton	regulation of biological process,cell organization and biogenesis,metabolic process	nucleotide binding,transcription regulator activity,DNA binding,metal ion binding,protein binding	Cytoplasm. Melanosome. Cytoplasm > cytoskeleton > centrosome.	TCP-1 chaperonin family
P50993		AT1A2_HUMAN	P50993	ATP1A2	Sodium/potassium-transporting ATPase subunit alpha-2	Homo sapiens		X	8		_	plas	plas	plas,plas	membrane,endosome,cytoplasm	regulation of biological process,cellular component movement,cellular homeostasis,metabolic process,response to stimulus,transport,cell communication	catalytic activity,nucleotide binding,metal ion binding,protein binding,transporter activity	Membrane; Multi-pass membrane protein. Cell membrane; Multi-pass membrane protein.	Cation transport ATPase (P-type) (TC 3.A.3) family, Type IIC subfamily
P51114-3		FXR1_HUMAN	P51114-3	FXR1	Isoform 3 of Fragile X mental retardation syndrome-related protein 1	Homo sapiens		X	0		_	nucl	cyto	cyto	cytoplasm,nucleus,organelle lumen	cell differentiation,regulation of biological process,development,metabolic process,cell death	protein binding,RNA binding	Cytoplasm.	FMR1 family	KH domains (2)
P51149	RAB7A_HUMAN		P51149	RAB7A	Ras-related protein Rab-7a	Homo sapiens	X		0		S	cyto	cyto	endo,lyso,cyve,cyve	Golgi,endosome,cytoplasm,vacuole	regulation of biological process,cell organization and biogenesis,metabolic process,transport,cell communication	catalytic activity,DNA binding,nucleotide binding,protein binding,enzyme regulator activity	Late endosome. Lysosome. Cytoplasmic vesicle > phagosome. Melanosome.	Small GTPase superfamily, Rab family
P51571	SSRD_HUMAN		P51571	SSR4	Translocon-associated protein subunit delta	Homo sapiens	X		1	S	S	plas	cyto	E.R.	membrane,cytoplasm,endoplasmic reticulum	cell organization and biogenesis,transport	signal transducer activity,metal ion binding,protein binding,receptor activity	Endoplasmic reticulum membrane; Single-pass type I membrane protein.	TRAP-delta family
P51572	BAP31_HUMAN		P51572	BCAP31	B-cell receptor-associated protein 31	Homo sapiens	X		2	S	S	E.R.	cyto	E.R.,E.R._golg	membrane,Golgi,cytoplasm,endoplasmic reticulum,cytosol	defense response,regulation of biological process,cell differentiation,reproduction,cell organization and biogenesis,metabolic process,cell death,response to stimulus,transport	catalytic activity,signal transducer activity,protein binding,receptor activity	Endoplasmic reticulum membrane; Multi-pass membrane protein. Endoplasmic reticulum-Golgi intermediate compartment membrane; Multi-pass membrane protein.	BCAP29/BCAP31 family
P51608-2		MECP2_HUMAN	P51608-2	MECP2	Isoform B of Methyl-CpG-binding protein 2	Homo sapiens		X	0		_	nucl	nucl	nucl	cytoplasm,nucleus,cytosol,mitochondrion,organelle lumen,chromosome	regulation of biological process,cell differentiation,development,cell organization and biogenesis,cell proliferation,metabolic process,response to stimulus	DNA binding,nucleotide binding,transcription regulator activity,protein binding,RNA binding	Nucleus.		A.T hook DNA-binding domains (2); MBD (methyl-CpG-binding) domain (1)
P51659		DHB4_HUMAN	P51659	HSD17B4	Peroxisomal multifunctional enzyme type 2	Homo sapiens		X	1		M	cyto	cyto	pero	cytoplasm,cytosol,mitochondrion,organelle lumen,cytoskeleton	regulation of biological process,cell differentiation,cell division,reproduction,cellular component movement,development,cell organization and biogenesis,metabolic process,transport	catalytic activity,nucleotide binding,DNA binding,protein binding,transporter activity	Peroxisome.	Short-chain dehydrogenases/reductases (SDR) family	SCP2 domain (1)	Lipid metabolism; fatty acid beta-oxidation.
P51991-2	ROA3_HUMAN	ROA3_HUMAN	P51991-2	HNRNPA3	Isoform 2 of Heterogeneous nuclear ribonucleoprotein A3	Homo sapiens	X	X	0		_	nucl	nucl	nucl	spliceosomal complex,cytoplasm,nucleus,organelle lumen	metabolic process,transport	nucleotide binding,protein binding,RNA binding,transporter activity	Nucleus.		RRM (RNA recognition motif) domains (2)
P52272-2	HNRPM_HUMAN	HNRPM_HUMAN	P52272-2	HNRNPM	Isoform 2 of Heterogeneous nuclear ribonucleoprotein M	Homo sapiens	X	X	0		_	cyto	plas	nucl	spliceosomal complex,membrane,nucleus,organelle lumen	metabolic process	nucleotide binding,signal transducer activity,protein binding,RNA binding,receptor activity	Nucleus > nucleolus.		RRM (RNA recognition motif) domains (3)
P52434		RPB8_HUMAN	P52434	POLR2H	DNA-directed RNA polymerases I, II, and III subunit RPABC3	Homo sapiens		X	0		_	cysk	nucl	nucl	nucleus,organelle lumen	regulation of biological process,reproduction,cell organization and biogenesis,metabolic process,response to stimulus	catalytic activity,metal ion binding,protein binding	Nucleus > nucleolus.	Eukaryotic RPB8 RNA polymerase subunit family
P52565		GDIR_HUMAN	P52565	ARHGDIA	Rho GDP-dissociation inhibitor 1	Homo sapiens		X	0		_	cyto	cyto	cyto	membrane,cytoplasm,cytosol,nucleus,mitochondrion,cytoskeleton	defense response,coagulation,regulation of biological process,cell differentiation,development,metabolic process,transport,cell communication,cellular component movement,cell organization and biogenesis,cell growth,cell death,response to stimulus	catalytic activity,nucleotide binding,protein binding,enzyme regulator activity	Cytoplasm.	Rho GDI family
P52597		HNRPF_HUMAN	P52597	HNRNPF	Heterogeneous nuclear ribonucleoprotein F	Homo sapiens		X	0		_	cyto	nucl	nucl	membrane,spliceosomal complex,cytoplasm,nucleus,extracellular,organelle lumen,chromosome	regulation of biological process,metabolic process,cell death,response to stimulus,transport	catalytic activity,DNA binding,nucleotide binding,signal transducer activity,metal ion binding,protein binding,RNA binding,transporter activity,receptor activity	Nucleus > nucleoplasm.		RRM (RNA recognition motif) domains (3)
P52907	CAZA1_HUMAN	CAZA1_HUMAN	P52907	CAPZA1	F-actin-capping protein subunit alpha-1	Homo sapiens	X	X	0		_	cyto	cyto	cyto	membrane,cytoplasm,nucleus,endoplasmic reticulum,cytosol,extracellular,mitochondrion,vacuole,organelle lumen,cytoskeleton	defense response,coagulation,cell differentiation,regulation of biological process,development,cellular component movement,cell organization and biogenesis,cell proliferation,metabolic process,response to stimulus,cell communication	catalytic activity,structural molecule activity,metal ion binding,antioxidant activity,protein binding,enzyme regulator activity	Cytoplasm > cytoskeleton.	F-actin-capping protein alpha subunit family
P52926		HMGA2_HUMAN	P52926	HMGA2	High mobility group protein HMGI-C	Homo sapiens		X	0		_	nucl	nucl	nucl	nucleus,chromosome	cell division,regulation of biological process,development,cell organization and biogenesis,cell growth,metabolic process,cell communication	DNA binding,protein binding	Nucleus.	HMGA family	A.T hook DNA-binding domains (3)
P52943	CRIP2_HUMAN	CRIP2_HUMAN	P52943	CRIP2	Cysteine-rich protein 2	Homo sapiens	X	X	0		_	nucl	plas	-	extracellular	regulation of biological process,development,cell proliferation	metal ion binding			LIM zinc-binding domains (2)
P53396		ACLY_HUMAN	P53396	ACLY	ATP-citrate synthase	Homo sapiens		X	2		_	cyto	cyto	cyto	membrane,cytoplasm,cytosol,nucleus,extracellular,organelle lumen	regulation of biological process,metabolic process,transport,cell communication	catalytic activity,nucleotide binding,signal transducer activity,metal ion binding,protein binding,transporter activity	Cytoplasm.	Succinate/malate CoA ligase beta subunit family; Succinate/malate CoA ligase alpha subunit family
P53618		COPB_HUMAN	P53618	COPB1	Coatomer subunit beta	Homo sapiens		X	4		_	cysk	cyto	cyto,golg,cyve	membrane,Golgi,cytoplasm,endoplasmic reticulum,cytosol	cell organization and biogenesis,metabolic process,transport	catalytic activity,structural molecule activity,metal ion binding,protein binding,transporter activity	Cytoplasm. Golgi apparatus membrane; Peripheral membrane protein; Cytoplasmic side. Cytoplasmic vesicle > COPI-coated vesicle membrane; Peripheral membrane protein; Cytoplasmic side.
P53801	PTTG_HUMAN		P53801	PTTG1IP	Pituitary tumor-transforming gene 1 protein-interacting protein	Homo sapiens	X		1	S	S	extr	nucl	plas,cyto,nucl	membrane,cytoplasm,nucleus,cytoskeleton	development,cell organization and biogenesis,metabolic process,transport	catalytic activity,metal ion binding,protein binding	Membrane; Single-pass type I membrane protein. Cytoplasm. Nucleus.		PSI domain (1)
P53992	SC24C_HUMAN		P53992	SEC24C	Protein transport protein Sec24C	Homo sapiens	X		2		_	nucl	cyto	cyto,cyto,E.R.,golg	membrane,Golgi,cytoplasm,endoplasmic reticulum,nucleus,cytosol,extracellular	defense response,regulation of biological process,cell organization and biogenesis,metabolic process,response to stimulus,transport	catalytic activity,transcription regulator activity,metal ion binding,protein binding	Cytoplasm. Cytoplasm > perinuclear region. Endoplasmic reticulum membrane. Golgi apparatus membrane.	SEC23/SEC24 family, SEC24 subfamily
P54709	AT1B3_HUMAN		P54709	ATP1B3	Sodium/potassium-transporting ATPase subunit beta-3	Homo sapiens	X		0	S	_	cyto	plas	plas,cyve	membrane,cytoplasm	coagulation,cellular component movement,metabolic process,response to stimulus,transport	catalytic activity,nucleotide binding,metal ion binding,protein binding,transporter activity	Membrane; Single-pass type II membrane protein. Melanosome.	X(+)/potassium ATPases subunit beta family
P54727	RD23B_HUMAN	RD23B_HUMAN	P54727	RAD23B	UV excision repair protein RAD23 homolog B	Homo sapiens	X	X	0		_	cyto	nucl	nucl,cyto	proteasome,cytoplasm,cytosol,nucleus,organelle lumen,chromosome	regulation of biological process,reproduction,cell organization and biogenesis,metabolic process,response to stimulus	catalytic activity,DNA binding,nucleotide binding,metal ion binding,protein binding	Nucleus. Cytoplasm.	RAD23 family	STI1 domain (1); UBA domains (2); Ubiquitin-like domain (1)
P54819-6	KAD2_HUMAN		P54819-6	AK2	Isoform 6 of Adenylate kinase 2, mitochondrial	Homo sapiens	X		0		_	cyto	cyto	mito	membrane,cytoplasm,mitochondrion	metabolic process	catalytic activity,nucleotide binding	Mitochondrion intermembrane space.	Adenylate kinase family, AK2 subfamily
P55036-2		PSMD4_HUMAN	P55036-2	PSMD4	Isoform Rpn10E of 26S proteasome non-ATPase regulatory subunit 4	Homo sapiens		X	0		_	cysk	cyto	-	proteasome,cytoplasm,cytosol,nucleus	regulation of biological process,metabolic process,cell death,response to stimulus	transcription regulator activity,metal ion binding,protein binding		Proteasome subunit S5A family	UIM (ubiquitin-interacting motif) repeats (2); VWFA domain (1)
P55072	TERA_HUMAN	TERA_HUMAN	P55072	VCP	Transitional endoplasmic reticulum ATPase	Homo sapiens	X	X	1		_	cyto_nucl	cyto	cyto,nucl	proteasome,membrane,Golgi,cytoplasm,endoplasmic reticulum,cytosol,nucleus,organelle lumen	cell differentiation,regulation of biological process,cell organization and biogenesis,metabolic process,cell death,response to stimulus,transport,cell communication	catalytic activity,nucleotide binding,DNA binding,protein binding,RNA binding	Cytoplasm > cytosol. Nucleus.	AAA ATPase family
P55084	ECHB_HUMAN		P55084	HADHB	Trifunctional enzyme subunit beta, mitochondrial	Homo sapiens	X		0		M	nucl	cyto	mito	membrane,cytoplasm,mitochondrion,organelle lumen	metabolic process	catalytic activity,nucleotide binding	Mitochondrion.	Thiolase family		Lipid metabolism; fatty acid beta-oxidation.
P55145		ARMET_HUMAN	P55145	MANF	Mesencephalic astrocyte-derived neurotrophic factor	Homo sapiens		X	0	S	S	extr	extr	extr	Golgi,cytoplasm,cytosol,extracellular,cytoskeleton	regulation of biological process,metabolic process,response to stimulus,transport	catalytic activity,nucleotide binding,protein binding	Secreted.	ARMET family
P55209	NP1L1_HUMAN	NP1L1_HUMAN	P55209	NAP1L1	Nucleosome assembly protein 1-like 1	Homo sapiens	X	X	0		_	cyto_nucl	nucl	nucl,cyve	membrane,cytoplasm,nucleus,organelle lumen	regulation of biological process,cell differentiation,cell organization and biogenesis,metabolic process,cell proliferation	protein binding	Nucleus. Melanosome.	Nucleosome assembly protein (NAP) family
P55290	CAD13_HUMAN	CAD13_HUMAN	P55290	CDH13	Cadherin-13	Homo sapiens	X	X	0	S	S	E.R.	plas	plas	membrane,cytoplasm,extracellular,cell surface	regulation of biological process,cellular component movement,cell organization and biogenesis,cell growth,cell proliferation,metabolic process,cell death,response to stimulus,transport,cell communication	catalytic activity,metal ion binding,protein binding	Cell membrane; Lipid-anchor > GPI-anchor.		Cadherin domains (5)
P55291	CAD15_HUMAN		P55291	CDH15	Cadherin-15	Homo sapiens	X		1	S	S	E.R.	plas	plas	membrane,cytoplasm,nucleus,cytosol,extracellular,organelle lumen,cytoskeleton	regulation of biological process,cell division,cell differentiation,cell organization and biogenesis,cellular homeostasis,metabolic process,response to stimulus,transport	catalytic activity,nucleotide binding,metal ion binding,protein binding,transporter activity	Cell membrane; Single-pass type I membrane protein.		Cadherin domains (5)
P55735	SEC13_HUMAN	SEC13_HUMAN	P55735	SEC13	Protein SEC13 homolog	Homo sapiens	X	X	0		_	cysk	cyto	-	membrane,cytoplasm,nucleus,endoplasmic reticulum,cytosol,extracellular,chromosome	defense response,cell organization and biogenesis,metabolic process,response to stimulus,transport	protein binding,transporter activity		WD repeat SEC13 family	WD repeats (6)
P55769		NHPX_HUMAN	P55769	NHP2L1	NHP2-like protein 1	Homo sapiens		X	0		_	cyto	nucl	nucl	spliceosomal complex,ribosome,cytoplasm,nucleus,organelle lumen	regulation of biological process,reproduction,cell organization and biogenesis,metabolic process	structural molecule activity,protein binding,RNA binding	Nucleus > nucleolus.	Ribosomal protein L7Ae family
P55795	HNRH2_HUMAN	HNRH2_HUMAN	P55795	HNRNPH2	Heterogeneous nuclear ribonucleoprotein H2	Homo sapiens	X	X	0		_	nucl	nucl	nucl	membrane,cytoplasm,nucleus,extracellular,organelle lumen,cytoskeleton	regulation of biological process,cell organization and biogenesis,metabolic process,response to stimulus,cell communication	catalytic activity,nucleotide binding,DNA binding,transcription regulator activity,structural molecule activity,metal ion binding,protein binding,RNA binding	Nucleus > nucleoplasm.		RRM (RNA recognition motif) domains (3)
P56537		IF6_HUMAN	P56537	EIF6	Eukaryotic translation initiation factor 6	Homo sapiens		X	0		_	cyto_nucl	cyto	cyto,nucl	membrane,cytoplasm,nucleus,organelle lumen,cytoskeleton	cell differentiation,regulation of biological process,cell organization and biogenesis,metabolic process,cell communication	translation regulator activity,protein binding,RNA binding	Cytoplasm. Nucleus > nucleolus.	EIF-6 family
P60174-2	TPIS_HUMAN		P60174-2	TPI1	Isoform 2 of Triosephosphate isomerase	Homo sapiens	X		0		_	cyto	cyto	-	cytoplasm,nucleus,cytosol	development,metabolic process	catalytic activity,protein binding		Triosephosphate isomerase family		Carbohydrate biosynthesis; gluconeogenesis. Carbohydrate degradation; glycolysis; D-glyceraldehyde 3-phosphate from glycerone phosphate: step 1/1.
P60468	SC61B_HUMAN		P60468	SEC61B	Protein transport protein Sec61 subunit beta	Homo sapiens	X		1		_	mito	cyto	E.R.	membrane,Golgi,cytoplasm,cytosol,endoplasmic reticulum	cell organization and biogenesis,metabolic process,transport	nucleotide binding,metal ion binding,protein binding,transporter activity	Endoplasmic reticulum membrane; Single-pass membrane protein.	SEC61-beta family
P60660-2	MYL6_HUMAN	MYL6_HUMAN	P60660-2	MYL6	Isoform Smooth muscle of Myosin light polypeptide 6	Homo sapiens	X	X	0		_	cyto	cyto	-	cytoplasm,cytosol,cytoskeleton	cell differentiation,development,cell organization and biogenesis,response to stimulus,transport	catalytic activity,structural molecule activity,metal ion binding,motor activity			EF-hand domains (3)
P60709	ACTB_HUMAN	ACTB_HUMAN	P60709	ACTB	Actin, cytoplasmic 1	Homo sapiens	X	X	0		_	cysk	cyto	cyto	membrane,Golgi,endosome,cytoplasm,nucleus,cytosol,extracellular,organelle lumen,cytoskeleton,cell surface	defense response,coagulation,cell differentiation,cell division,regulation of biological process,reproduction,cellular component movement,development,cell organization and biogenesis,metabolic process,response to stimulus,transport	catalytic activity,nucleotide binding,structural molecule activity,protein binding	Cytoplasm > cytoskeleton.	Actin family
P60842	IF4A1_HUMAN	IF4A1_HUMAN	P60842	EIF4A1	Eukaryotic initiation factor 4A-I	Homo sapiens	X	X	0		_	nucl	cyto	-	cytoplasm,cytosol	development,metabolic process	translation regulator activity,catalytic activity,DNA binding,nucleotide binding,protein binding,enzyme regulator activity,RNA binding		DEAD box helicase family, eIF4A subfamily	Helicase ATP-binding domain (1); Helicase C-terminal domain (1)
P60866	RS20_HUMAN		P60866	RPS20	40S ribosomal protein S20	Homo sapiens	X		0		_	cyto	cyto	-	membrane,ribosome,cytoplasm,cytosol	regulation of biological process,reproduction,development,cell organization and biogenesis,metabolic process,response to stimulus	translation regulator activity,catalytic activity,DNA binding,structural molecule activity,signal transducer activity,metal ion binding,protein binding,RNA binding,receptor activity		Ribosomal protein S10P family
P60903	S10AA_HUMAN	S10AA_HUMAN	P60903	S100A10	Protein S100-A10	Homo sapiens	X	X	1		_	cyto	cyto	-	cytoplasm,mitochondrion	regulation of biological process,cell communication	signal transducer activity,metal ion binding,protein binding		S-100 family
P61158		ARP3_HUMAN	P61158	ACTR3	Actin-related protein 3	Homo sapiens		X	1		_	cyto	plas	cyto,plas	membrane,Golgi,cytoplasm,cytoskeleton	regulation of biological process,cell differentiation,development,cellular component movement,cell organization and biogenesis,metabolic process,response to stimulus	catalytic activity,nucleotide binding,structural molecule activity,protein binding	Cytoplasm > cytoskeleton. Cell projection.	Actin family, ARP3 subfamily
P61160		ARP2_HUMAN	P61160	ACTR2	Actin-related protein 2	Homo sapiens		X	1		_	cyto	plas	cyto,plas	cytoplasm,cytoskeleton	cellular component movement	nucleotide binding,structural molecule activity,protein binding	Cytoplasm > cytoskeleton. Cell projection.	Actin family, ARP2 subfamily
P61163		ACTZ_HUMAN	P61163	ACTR1A	Alpha-centractin	Homo sapiens		X	1		_	cysk	cyto	cyto,cyto	membrane,cytoplasm,cytosol,extracellular,mitochondrion,cytoskeleton	cell organization and biogenesis,metabolic process,cell death,transport,cell communication	catalytic activity,nucleotide binding,structural molecule activity,signal transducer activity,metal ion binding,protein binding,transporter activity,motor activity	Cytoplasm > cytoskeleton. Cytoplasm > cytoskeleton > centrosome.	Actin family, ARP1 subfamily
P61204	ARF3_HUMAN		P61204	ARF3	ADP-ribosylation factor 3	Homo sapiens	X		0		_	cyto	cyto	golg,cyto	Golgi,cytoplasm	regulation of biological process,cell organization and biogenesis,metabolic process,transport,cell communication	catalytic activity,nucleotide binding,signal transducer activity	Golgi apparatus. Cytoplasm > perinuclear region.	Small GTPase superfamily, Arf family
P61247	RS3A_HUMAN		P61247	RPS3A	40S ribosomal protein S3a	Homo sapiens	X		0		_	nucl	cyto	cyto,nucl	ribosome,cytoplasm,nucleus,cytosol,organelle lumen	regulation of biological process,cell differentiation,reproduction,development,cell organization and biogenesis,metabolic process,cell death	structural molecule activity,protein binding,RNA binding	Cytoplasm. Nucleus.	Ribosomal protein S3Ae family
P61254		RL26_HUMAN	P61254	RPL26	60S ribosomal protein L26	Homo sapiens		X	0		M	nucl	cyto	-	ribosome,cytoplasm,cytosol,nucleus,extracellular	regulation of biological process,reproduction,development,cell organization and biogenesis,metabolic process,response to stimulus	catalytic activity,nucleotide binding,transcription regulator activity,structural molecule activity,metal ion binding,protein binding,RNA binding		Ribosomal protein L24P family
P61313	RL15_HUMAN	RL15_HUMAN	P61313	RPL15	60S ribosomal protein L15	Homo sapiens	X	X	0		_	nucl	cyto	-	ribosome,cytoplasm,nucleus,cytosol,organelle lumen	regulation of biological process,cell differentiation,reproduction,development,cell organization and biogenesis,metabolic process,response to stimulus,transport,cell communication	translation regulator activity,catalytic activity,nucleotide binding,DNA binding,transcription regulator activity,structural molecule activity,metal ion binding,protein binding,RNA binding		Ribosomal protein L15e family
P61353	RL27_HUMAN	RL27_HUMAN	P61353	RPL27	60S ribosomal protein L27	Homo sapiens	X	X	0		_	cyto	cyto	-	ribosome,cytoplasm,nucleus,cytosol	regulation of biological process,reproduction,development,cell organization and biogenesis,metabolic process,response to stimulus,cell communication	translation regulator activity,catalytic activity,transcription regulator activity,nucleotide binding,structural molecule activity,metal ion binding,protein binding,RNA binding		Ribosomal protein L27e family	KOW domain (1)
P61513		RL37A_HUMAN	P61513	RPL37A	60S ribosomal protein L37a	Homo sapiens		X	0		_	extr	cyto	-	ribosome,cytoplasm,nucleus,cytosol	regulation of biological process,reproduction,development,cell organization and biogenesis,metabolic process,response to stimulus	transcription regulator activity,nucleotide binding,structural molecule activity,metal ion binding,protein binding,RNA binding		Ribosomal protein L37Ae family
P61586		RHOA_HUMAN	P61586	RHOA	Transforming protein RhoA	Homo sapiens		X	0		_	cyto	cyto	plas,cyto	membrane,cytoplasm,nucleus,cytosol,mitochondrion,cytoskeleton	coagulation,regulation of biological process,cell differentiation,development,cellular homeostasis,metabolic process,transport,cell communication,cell division,cellular component movement,cell organization and biogenesis,cell growth,cell death,response to stimulus	catalytic activity,nucleotide binding,metal ion binding,signal transducer activity,protein binding,enzyme regulator activity	Cell membrane; Lipid-anchor; Cytoplasmic side. Cytoplasm > cytoskeleton.	Small GTPase superfamily, Rho family
P61604	CH10_HUMAN		P61604	HSPE1	10 kDa heat shock protein, mitochondrial	Homo sapiens	X		0		_	mito	cyto	mito	membrane,cytoplasm,cytosol,mitochondrion,organelle lumen	cell differentiation,cell division,regulation of biological process,reproduction,cell organization and biogenesis,metabolic process,cell death,response to stimulus,cell communication	catalytic activity,nucleotide binding,transcription regulator activity,protein binding	Mitochondrion matrix.	GroES chaperonin family
P61619-3	S61A1_HUMAN		P61619-3	SEC61A1	Isoform 3 of Protein transport protein Sec61 subunit alpha isoform 1	Homo sapiens	X		5	S	S	plas	cyto	E.R.	membrane,cytoplasm,endoplasmic reticulum	transport	protein binding,transporter activity	Endoplasmic reticulum membrane; Multi-pass membrane protein.	SecY/SEC61-alpha family
P61916	NPC2_HUMAN		P61916	NPC2	Epididymal secretory protein E1	Homo sapiens	X		0	S	S	extr	extr	extr	membrane,cytoplasm,nucleus,extracellular,vacuole	regulation of biological process,metabolic process,response to stimulus,transport	metal ion binding,protein binding	Secreted.	NPC2 family
P61956		SUMO2_HUMAN	P61956	LOC728825	Small ubiquitin-related modifier 2	Homo sapiens		X	0		_	cyto	nucl	nucl	nucleus	regulation of biological process,metabolic process,response to stimulus	catalytic activity,DNA binding,protein binding,enzyme regulator activity	Nucleus.	Ubiquitin family, SUMO subfamily	Ubiquitin-like domain (1)
P61978-3	HNRPK_HUMAN	HNRPK_HUMAN	P61978-3	HNRNPK	Isoform 3 of Heterogeneous nuclear ribonucleoprotein K	Homo sapiens	X	X	0		_	nucl	nucl	cyto,nucl	spliceosomal complex,cytoplasm,nucleus,organelle lumen	regulation of biological process,metabolic process	DNA binding,protein binding,RNA binding	Cytoplasm. Nucleus > nucleoplasm.		KH domains (3)
P61981	1433G_HUMAN	1433G_HUMAN	P61981	YWHAG	14-3-3 protein gamma	Homo sapiens	X	X	0		_	cyto	cyto	cyto	cytoplasm,cytosol	regulation of biological process,cell differentiation,development,cell organization and biogenesis,metabolic process,cell death,transport,cell communication	catalytic activity,signal transducer activity,metal ion binding,protein binding,enzyme regulator activity	Cytoplasm.	14-3-3 family
P62081	RS7_HUMAN	RS7_HUMAN	P62081	RPS7	40S ribosomal protein S7	Homo sapiens	X	X	0		_	cyto	cyto	-	membrane,ribosome,cytoplasm,cytosol,nucleus,organelle lumen	regulation of biological process,reproduction,development,cell organization and biogenesis,metabolic process,response to stimulus	translation regulator activity,catalytic activity,DNA binding,structural molecule activity,metal ion binding,protein binding,RNA binding		Ribosomal protein S7e family
P62136		PP1A_HUMAN	P62136	PPP1CA	Serine/threonine-protein phosphatase PP1-alpha catalytic subunit	Homo sapiens		X	0		_	cyto	cyto	cyto,nucl,nucl,nucl	cytoplasm,nucleus,cytosol,extracellular,organelle lumen	cell division,development,metabolic process	catalytic activity,metal ion binding,protein binding,enzyme regulator activity	Cytoplasm. Nucleus. Nucleus > nucleoplasm. Nucleus > nucleolus.	PPP phosphatase family, PP-1 subfamily
P62140	PP1B_HUMAN	PP1B_HUMAN	P62140	PPP1CB	Serine/threonine-protein phosphatase PP1-beta catalytic subunit	Homo sapiens	X	X	0		_	cyto	cyto	cyto,nucl,nucl,nucl	membrane,cytoplasm,nucleus,organelle lumen	regulation of biological process,cell division,metabolic process,transport	catalytic activity,metal ion binding,protein binding,transporter activity	Cytoplasm. Nucleus. Nucleus > nucleoplasm. Nucleus > nucleolus.	PPP phosphatase family, PP-1 subfamily
P62158	CALM_HUMAN	CALM_HUMAN	P62158	CALM3	Calmodulin	Homo sapiens	X	X	0		_	cyto_nucl	plas	cyto,cyto	membrane,cytoplasm,cytosol,endoplasmic reticulum,nucleus,extracellular,organelle lumen,chromosome,cytoskeleton	coagulation,cell division,regulation of biological process,cellular component movement,development,cell organization and biogenesis,cellular homeostasis,metabolic process,response to stimulus,transport,cell communication	catalytic activity,nucleotide binding,metal ion binding,protein binding,transporter activity,motor activity	Cytoplasm > cytoskeleton > spindle. Cytoplasm > cytoskeleton > spindle pole.	Calmodulin family	EF-hand domains (4)
P62241	RS8_HUMAN	RS8_HUMAN	P62241	RPS8	40S ribosomal protein S8	Homo sapiens	X	X	0		_	nucl	cyto	cyto	membrane,ribosome,cytoplasm,cytosol	regulation of biological process,reproduction,development,cell organization and biogenesis,metabolic process,response to stimulus	translation regulator activity,catalytic activity,DNA binding,structural molecule activity,metal ion binding,protein binding,RNA binding	Cytoplasm.	Ribosomal protein S8e family
P62244	RS15A_HUMAN		P62244	RPS15A	40S ribosomal protein S15a	Homo sapiens	X		0		_	cyto	cyto	-	ribosome,cytoplasm,cytosol,mitochondrion	regulation of biological process,reproduction,development,cell organization and biogenesis,cell proliferation,metabolic process,response to stimulus	catalytic activity,structural molecule activity,metal ion binding,protein binding,RNA binding		Ribosomal protein S8P family
P62249	RS16_HUMAN	RS16_HUMAN	P62249	RPS16	40S ribosomal protein S16	Homo sapiens	X	X	0		_	cyto	cyto	-	membrane,ribosome,cytoplasm,cytosol	regulation of biological process,reproduction,development,cell organization and biogenesis,metabolic process,response to stimulus,cell communication	translation regulator activity,catalytic activity,DNA binding,nucleotide binding,structural molecule activity,metal ion binding,protein binding,RNA binding		Ribosomal protein S9P family
P62258-2	1433E_HUMAN	1433E_HUMAN	P62258-2	YWHAE	Isoform SV of 14-3-3 protein epsilon	Homo sapiens	X	X	1		_	cyto	cyto	cyto,cyve	cytoplasm,cytosol,mitochondrion,cytoskeleton	cell differentiation,regulation of biological process,development,cellular component movement,metabolic process,cell death,transport	protein binding	Cytoplasm. Melanosome.	14-3-3 family
P62263	RS14_HUMAN	RS14_HUMAN	P62263	RPS14	40S ribosomal protein S14	Homo sapiens	X	X	0		_	cyto	cyto	-	membrane,ribosome,cytoplasm,nucleus,cytosol,organelle lumen	regulation of biological process,cell differentiation,reproduction,development,cell organization and biogenesis,metabolic process,response to stimulus	translation regulator activity,catalytic activity,DNA binding,structural molecule activity,metal ion binding,protein binding,RNA binding		Ribosomal protein S11P family
P62266	RS23_HUMAN		P62266	RPS23	40S ribosomal protein S23	Homo sapiens	X		0		_	cyto	cyto	-	ribosome,cytoplasm,cytosol	reproduction,development,cell organization and biogenesis,metabolic process	translation regulator activity,structural molecule activity,protein binding,RNA binding		Ribosomal protein S12P family
P62269	RS18_HUMAN	RS18_HUMAN	P62269	RPS18	40S ribosomal protein S18	Homo sapiens	X	X	0		_	cyto	cyto	cyto	ribosome,cytoplasm,cytosol	reproduction,development,cell organization and biogenesis,metabolic process	transcription regulator activity,structural molecule activity,signal transducer activity,protein binding,RNA binding,receptor activity	Cytoplasm.	Ribosomal protein S13P family
P62277	RS13_HUMAN	RS13_HUMAN	P62277	RPS13	40S ribosomal protein S13	Homo sapiens	X	X	0		M	cyto	cyto	-	membrane,ribosome,cytoplasm,cytosol,nucleus,organelle lumen	regulation of biological process,reproduction,development,cell organization and biogenesis,metabolic process,response to stimulus	translation regulator activity,catalytic activity,DNA binding,structural molecule activity,metal ion binding,protein binding,RNA binding		Ribosomal protein S15P family
P62280		RS11_HUMAN	P62280	RPS11	40S ribosomal protein S11	Homo sapiens		X	0		_	cyto	cyto	-	membrane,ribosome,cytoplasm,cytosol	regulation of biological process,reproduction,development,cell organization and biogenesis,metabolic process,response to stimulus	translation regulator activity,catalytic activity,DNA binding,structural molecule activity,metal ion binding,protein binding,RNA binding		Ribosomal protein S17P family
P62304		RUXE_HUMAN	P62304	SNRPE	Small nuclear ribonucleoprotein E	Homo sapiens		X	0		M	mito	nucl	nucl	spliceosomal complex,cytoplasm,cytosol,nucleus,organelle lumen	defense response,regulation of biological process,cell differentiation,development,cell organization and biogenesis,metabolic process,response to stimulus,transport,cell communication	catalytic activity,DNA binding,nucleotide binding,metal ion binding,protein binding,RNA binding	Nucleus.	SnRNP Sm proteins family
P62306		RUXF_HUMAN	P62306	SNRPF	Small nuclear ribonucleoprotein F	Homo sapiens		X	0		_	cyto	nucl	nucl	spliceosomal complex,cytoplasm,nucleus,cytosol,organelle lumen	regulation of biological process,cell differentiation,development,cell organization and biogenesis,metabolic process,response to stimulus,transport	catalytic activity,DNA binding,nucleotide binding,metal ion binding,protein binding,RNA binding	Nucleus.	SnRNP Sm proteins family, SmF/LSm6 subfamily
P62314	SMD1_HUMAN	SMD1_HUMAN	P62314	SNRPD1	Small nuclear ribonucleoprotein Sm D1	Homo sapiens	X	X	0		_	nucl	nucl	nucl	spliceosomal complex,cytoplasm,cytosol,nucleus,organelle lumen,chromosome	cell differentiation,regulation of biological process,development,cell organization and biogenesis,metabolic process	catalytic activity,nucleotide binding,metal ion binding,protein binding,RNA binding	Nucleus.	SnRNP core protein family
P62316		SMD2_HUMAN	P62316	SNRPD2	Small nuclear ribonucleoprotein Sm D2	Homo sapiens		X	0		_	cyto	nucl	nucl	spliceosomal complex,cytoplasm,nucleus,cytosol,organelle lumen	regulation of biological process,cell differentiation,development,cell organization and biogenesis,metabolic process	nucleotide binding,metal ion binding,protein binding,RNA binding	Nucleus.	SnRNP core protein family
P62318	SMD3_HUMAN	SMD3_HUMAN	P62318	SNRPD3	Small nuclear ribonucleoprotein Sm D3	Homo sapiens	X	X	0		_	cyto	nucl	nucl	spliceosomal complex,cytoplasm,nucleus,cytosol,organelle lumen	regulation of biological process,cell differentiation,development,cell organization and biogenesis,metabolic process	nucleotide binding,metal ion binding,protein binding,RNA binding	Nucleus.	SnRNP core protein family
P62333		PRS10_HUMAN	P62333	PSMC6	26S protease regulatory subunit 10B	Homo sapiens		X	0		_	cyto	nucl	cyto,nucl	proteasome,cytoplasm,nucleus,cytosol	regulation of biological process,metabolic process,cell death,response to stimulus	catalytic activity,nucleotide binding,protein binding,RNA binding	Cytoplasm. Nucleus.	AAA ATPase family
P62424	RL7A_HUMAN	RL7A_HUMAN	P62424	RPL7A	60S ribosomal protein L7a	Homo sapiens	X	X	0		_	cyto	cyto	-	membrane,ribosome,cytoplasm,cytosol	regulation of biological process,reproduction,development,cell organization and biogenesis,metabolic process,response to stimulus,transport	catalytic activity,nucleotide binding,DNA binding,structural molecule activity,metal ion binding,protein binding,RNA binding		Ribosomal protein L7Ae family
P62701	RS4X_HUMAN	RS4X_HUMAN	P62701	RPS4X	40S ribosomal protein S4, X isoform	Homo sapiens	X	X	0		_	cyto	cyto	cyto	ribosome,cytoplasm,cytosol	regulation of biological process,reproduction,development,cell organization and biogenesis,cell proliferation,metabolic process	structural molecule activity,RNA binding	Cytoplasm.	Ribosomal protein S4e family	S4 RNA-binding domain (1)
P62736	ACTA_HUMAN	ACTA_HUMAN	P62736	ACTA2	Actin, aortic smooth muscle	Homo sapiens	X	X	0		_	cysk	cyto	cyto	membrane,cytoplasm,cytosol,cytoskeleton	defense response,cell differentiation,regulation of biological process,development,cell organization and biogenesis,metabolic process,cell death,response to stimulus	nucleotide binding,structural molecule activity,signal transducer activity,protein binding,receptor activity	Cytoplasm > cytoskeleton.	Actin family
P62750		RL23A_HUMAN	P62750	RPL23A	60S ribosomal protein L23a	Homo sapiens		X	0		_	cyto	cyto	-	ribosome,cytoplasm,cytosol	regulation of biological process,reproduction,development,cell organization and biogenesis,metabolic process,response to stimulus,transport	catalytic activity,DNA binding,nucleotide binding,structural molecule activity,metal ion binding,protein binding,RNA binding		Ribosomal protein L23P family
P62753	RS6_HUMAN	RS6_HUMAN	P62753	RPS6	40S ribosomal protein S6	Homo sapiens	X	X	0		_	cyto	cyto	-	membrane,ribosome,cytoplasm,nucleus,cytosol,organelle lumen	regulation of biological process,cell differentiation,reproduction,development,cell organization and biogenesis,cell proliferation,metabolic process,cell death,response to stimulus	translation regulator activity,catalytic activity,DNA binding,structural molecule activity,metal ion binding,protein binding,RNA binding		Ribosomal protein S6e family
P62805	H4_HUMAN	H4_HUMAN	P62805	HIST2H4B	Histone H4	Homo sapiens	X	X	0		_	nucl	-	nucl,nucl	cytoplasm,nucleus,cytosol,organelle lumen,chromosome	defense response,coagulation,cell differentiation,regulation of biological process,development,cell organization and biogenesis,cell growth,metabolic process,cell proliferation,response to stimulus,cell communication	transcription regulator activity,DNA binding,protein binding	Nucleus. Chromosome.	Histone H4 family
P62807		H2B1C_HUMAN	P62807	HIST1H2BC	Histone H2B type 1-C/E/F/G/I	Homo sapiens		X	0		_	nucl	nucl	nucl,nucl	nucleus,chromosome	defense response,cell differentiation,cell organization and biogenesis,metabolic process,response to stimulus	DNA binding,protein binding	Nucleus. Chromosome.	Histone H2B family
P62826	RAN_HUMAN	RAN_HUMAN	P62826	RAN	GTP-binding nuclear protein Ran	Homo sapiens	X	X	0		_	cyto	nucl	nucl,cyto,cyve	membrane,cytoplasm,nucleus,cytosol,mitochondrion,organelle lumen,cytoskeleton,chromosome	cell differentiation,cell division,regulation of biological process,reproduction,cell organization and biogenesis,metabolic process,cell proliferation,cell death,response to stimulus,transport,cell communication	catalytic activity,DNA binding,transcription regulator activity,nucleotide binding,metal ion binding,signal transducer activity,protein binding,enzyme regulator activity,RNA binding,transporter activity,receptor activity	Nucleus. Cytoplasm. Melanosome.	Small GTPase superfamily, Ran family
P62829	RL23_HUMAN	RL23_HUMAN	P62829	RPL23	60S ribosomal protein L23	Homo sapiens	X	X	0		M	cyto	cyto	-	membrane,ribosome,cytoplasm,nucleus,cytosol,organelle lumen	regulation of biological process,cell division,reproduction,development,cell organization and biogenesis,metabolic process,response to stimulus,transport,cell communication	translation regulator activity,catalytic activity,nucleotide binding,DNA binding,structural molecule activity,metal ion binding,protein binding,RNA binding		Ribosomal protein L14P family
P62841		RS15_HUMAN	P62841	RPS15	40S ribosomal protein S15	Homo sapiens		X	0		_	cyto	cyto	-	membrane,ribosome,cytoplasm,nucleus,cytosol,mitochondrion,organelle lumen	regulation of biological process,cell differentiation,reproduction,development,cell organization and biogenesis,cell proliferation,metabolic process,cell death,response to stimulus,transport	translation regulator activity,catalytic activity,DNA binding,nucleotide binding,structural molecule activity,metal ion binding,protein binding,RNA binding		Ribosomal protein S19P family
P62847-3	RS24_HUMAN	RS24_HUMAN	P62847-3	RPS24	Isoform 3 of 40S ribosomal protein S24	Homo sapiens	X	X	0		_	cyto	cyto	-	ribosome,cytoplasm,nucleus,cytosol	reproduction,development,cell organization and biogenesis,metabolic process	nucleotide binding,structural molecule activity,protein binding		Ribosomal protein S24e family
P62851	RS25_HUMAN		P62851	RPS25	40S ribosomal protein S25	Homo sapiens	X		0		_	nucl	cyto	-	ribosome,cytoplasm,nucleus,cytosol,mitochondrion,organelle lumen,chromosome	regulation of biological process,reproduction,development,cell organization and biogenesis,metabolic process,transport	catalytic activity,nucleotide binding,DNA binding,structural molecule activity,protein binding,RNA binding		Ribosomal protein S25e family
P62854		RS26_HUMAN	P62854	RPS26P25	40S ribosomal protein S26	Homo sapiens		X	0		_	cyto	cyto	-	ribosome,cytoplasm,cytosol,extracellular	regulation of biological process,reproduction,development,cell organization and biogenesis,metabolic process	catalytic activity,DNA binding,structural molecule activity,metal ion binding,protein binding,RNA binding		Ribosomal protein S26e family
P62857		RS28_HUMAN	P62857	RPS28	40S ribosomal protein S28	Homo sapiens		X	0		M	cyto	cyto	-	ribosome,cytoplasm,nucleus,cytosol,mitochondrion,organelle lumen	regulation of biological process,reproduction,development,cell organization and biogenesis,metabolic process,transport	catalytic activity,nucleotide binding,structural molecule activity,metal ion binding,protein binding,RNA binding		Ribosomal protein S28e family
P62873	GBB1_HUMAN	GBB1_HUMAN	P62873	GNB1	Guanine nucleotide-binding protein G(I)/G(S)/G(T) subunit beta 1	Homo sapiens	X	X	0		_	cyto	plas	-	membrane	coagulation,regulation of biological process,cellular homeostasis,metabolic process,cell proliferation,response to stimulus,cell communication	catalytic activity,signal transducer activity,protein binding		WD repeat G protein beta family	WD repeats (7)
P62879	GBB2_HUMAN	GBB2_HUMAN	P62879	GNB2	Guanine nucleotide-binding protein G(I)/G(S)/G(T) subunit beta-2	Homo sapiens	X	X	0		_	cyto	plas	cyto	membrane,cytoplasm,mitochondrion	regulation of biological process,development,metabolic process,response to stimulus,transport,cell communication	catalytic activity,signal transducer activity,protein binding	Cytoplasm > perinuclear region.	WD repeat G protein beta family	WD repeats (7)
P62888	RL30_HUMAN	RL30_HUMAN	P62888	RPL30	60S ribosomal protein L30	Homo sapiens	X	X	0		_	cyto	cyto	-	ribosome,cytoplasm,nucleus,cytosol	regulation of biological process,reproduction,development,cell organization and biogenesis,metabolic process,response to stimulus,transport,cell communication	translation regulator activity,catalytic activity,nucleotide binding,transcription regulator activity,DNA binding,structural molecule activity,metal ion binding,protein binding,RNA binding		Ribosomal protein L30e family
P62899		RL31_HUMAN	P62899	RPL31	60S ribosomal protein L31	Homo sapiens		X	0		_	cyto	cyto	-	ribosome,cytoplasm,cytosol	regulation of biological process,reproduction,development,cell organization and biogenesis,metabolic process,response to stimulus,transport,cell communication	translation regulator activity,catalytic activity,nucleotide binding,DNA binding,structural molecule activity,metal ion binding,protein binding,RNA binding		Ribosomal protein L31e family
P62906	RL10A_HUMAN	RL10A_HUMAN	P62906	RPL10A	60S ribosomal protein L10a	Homo sapiens	X	X	0		_	cyto_nucl	cyto	-	ribosome,cytoplasm,cytosol,mitochondrion	reproduction,development,cell organization and biogenesis,metabolic process	catalytic activity,nucleotide binding,structural molecule activity,metal ion binding,RNA binding		Ribosomal protein L1P family
P62910		RL32_HUMAN	P62910	RPL32	60S ribosomal protein L32	Homo sapiens		X	0		_	cyto	cyto	-	ribosome,cytoplasm,cytosol	regulation of biological process,reproduction,development,cell organization and biogenesis,metabolic process,response to stimulus,transport,cell communication	translation regulator activity,catalytic activity,nucleotide binding,structural molecule activity,metal ion binding,protein binding,RNA binding		Ribosomal protein L32e family
P62913-2	RL11_HUMAN		P62913-2	RPL11	Isoform 2 of 60S ribosomal protein L11	Homo sapiens	X		1		_	cyto	cyto	-	ribosome,cytoplasm,nucleus,cytosol,organelle lumen	regulation of biological process,reproduction,development,cell organization and biogenesis,metabolic process,cell death,transport	structural molecule activity,protein binding,RNA binding		Ribosomal protein L5P family
P62917	RL8_HUMAN	RL8_HUMAN	P62917	RPL8	60S ribosomal protein L8	Homo sapiens	X	X	0		M	cyto	cyto	cyto	ribosome,cytoplasm,nucleus,cytosol,organelle lumen	cell differentiation,regulation of biological process,reproduction,development,cell organization and biogenesis,metabolic process,response to stimulus,cell communication	translation regulator activity,catalytic activity,nucleotide binding,transcription regulator activity,structural molecule activity,metal ion binding,protein binding,RNA binding	Cytoplasm.	Ribosomal protein L2P family
P62937	PPIA_HUMAN	PPIA_HUMAN	P62937	PPIA	Peptidyl-prolyl cis-trans isomerase A	Homo sapiens	X	X	0	S	_	cyto	cyto	cyto	cytoplasm,nucleus,cytosol,extracellular	coagulation,cell differentiation,regulation of biological process,reproduction,cellular component movement,development,cell organization and biogenesis,metabolic process,cell death,response to stimulus,transport	catalytic activity,DNA binding,nucleotide binding,structural molecule activity,metal ion binding,protein binding,RNA binding	Cytoplasm.	Cyclophilin-type PPIase family, PPIase A subfamily	PPIase cyclophilin-type domain (1)
P62979	RS27A_HUMAN		P62979	RPS27A	Ubiquitin-40S ribosomal protein S27a	Homo sapiens	X		0		_	extr	cyto	cyto,nucl	membrane,ribosome,endosome,cytoplasm,cytosol,nucleus,organelle lumen	defense response,regulation of biological process,cell differentiation,reproduction,cellular component movement,development,cell organization and biogenesis,metabolic process,cell death,response to stimulus,cell communication	catalytic activity,transcription regulator activity,DNA binding,nucleotide binding,structural molecule activity,metal ion binding,protein binding	Cytoplasm. Nucleus.	Ubiquitin family; Ribosomal protein S27Ae family	Ubiquitin-like domain (1)
317455225		UBIQ_HUMAN	P62988	UBB	Chain A, The Crystal Structure Of Human Ubiquitin Adduct With Zeise's Salt	Homo sapiens		X	0		_	extr	cyto	cyto,nucl,cyto	proteasome,membrane,ribosome,endosome,cytoplasm,nucleus,cytosol,extracellular,vacuole,mitochondrion,organelle lumen,cell surface	defense response,regulation of biological process,cell differentiation,development,metabolic process,transport,cell communication,reproduction,cellular component movement,cell organization and biogenesis,cell proliferation,cell death,response to stimulus	catalytic activity,DNA binding,transcription regulator activity,nucleotide binding,structural molecule activity,signal transducer activity,metal ion binding,protein binding	Cytoplasm. Nucleus. Cytoplasm.	Ubiquitin family; Ribosomal protein L40e family	Ubiquitin-like domain (1)
P63000-2	RAC1_HUMAN	RAC1_HUMAN	P63000-2	RAC1	Isoform B of Ras-related C3 botulinum toxin substrate 1	Homo sapiens	X	X	1		_	cyto	cyto	plas,cyve	membrane,cytoplasm,cytosol	defense response,coagulation,regulation of biological process,cell differentiation,development,metabolic process,transport,cell communication,cellular component movement,cell organization and biogenesis,cell proliferation,cell death,response to stimulus	catalytic activity,nucleotide binding,protein binding	Cell membrane; Lipid-anchor; Cytoplasmic side. Melanosome.	Small GTPase superfamily, Rho family
P63010-2	AP2B1_HUMAN	AP2B1_HUMAN	P63010-2	AP2B1	Isoform 2 of AP-2 complex subunit beta	Homo sapiens	X	X	1		_	plas	cyto	plas,plas	membrane,Golgi,cytoplasm,cytosol	defense response,cell differentiation,regulation of biological process,development,cell organization and biogenesis,metabolic process,response to stimulus,transport,cell communication	protein binding,transporter activity	Cell membrane. Membrane > coated pit; Peripheral membrane protein; Cytoplasmic side.	Adaptor complexes large subunit family
P63104	1433Z_HUMAN	1433Z_HUMAN	P63104	YWHAZ	14-3-3 protein zeta/delta	Homo sapiens	X	X	1		_	cyto	cyto	cyto,cyve	cytoplasm,nucleus,cytosol,mitochondrion,cytoskeleton	defense response,coagulation,regulation of biological process,cell differentiation,cell organization and biogenesis,metabolic process,cell death,response to stimulus,transport,cell communication	catalytic activity,nucleotide binding,metal ion binding,protein binding	Cytoplasm. Melanosome.	14-3-3 family
P63167		DYL1_HUMAN	P63167	DYNLL1	Dynein light chain 1, cytoplasmic	Homo sapiens		X	0		_	cyto	cyto	cyto,nucl,mito	membrane,cytoplasm,nucleus,cytosol,mitochondrion,cytoskeleton	regulation of biological process,cell differentiation,reproduction,development,cell organization and biogenesis,metabolic process,cell death,transport,cell communication	catalytic activity,protein binding,enzyme regulator activity,motor activity	Cytoplasm > cytoskeleton. Nucleus. Mitochondrion.	Dynein light chain family
P63173	RL38_HUMAN	RL38_HUMAN	P63173	RPL38	60S ribosomal protein L38	Homo sapiens	X	X	0		_	nucl	cyto	-	membrane,ribosome,cytoplasm,nucleus,endoplasmic reticulum,cytosol	regulation of biological process,reproduction,development,cell organization and biogenesis,metabolic process,response to stimulus,transport	catalytic activity,DNA binding,nucleotide binding,structural molecule activity,metal ion binding,protein binding,RNA binding		Ribosomal protein L38e family
P63220	RS21_HUMAN		P63220	RPS21	40S ribosomal protein S21	Homo sapiens	X		0		_	cyto	cyto	-	membrane,ribosome,cytoplasm,cytosol	cell differentiation,regulation of biological process,reproduction,development,cell organization and biogenesis,cell proliferation,metabolic process,response to stimulus	translation regulator activity,catalytic activity,DNA binding,structural molecule activity,metal ion binding,protein binding,RNA binding		Ribosomal protein S21e family
P63244	GBLP_HUMAN	GBLP_HUMAN	P63244	GNB2L1	Guanine nucleotide-binding protein subunit beta-2-like 1	Homo sapiens	X	X	0		_	cyto_nucl	cyto	plas	membrane,cytoplasm,cytosol	cell differentiation,regulation of biological process,development,metabolic process,cell proliferation,response to stimulus,cell communication	catalytic activity,nucleotide binding,signal transducer activity,protein binding	Cell membrane.	WD repeat G protein beta family	WD repeats (7)
P63316	TNNC1_HUMAN	TNNC1_HUMAN	P63316	TNNC1	Troponin C, slow skeletal and cardiac muscles	Homo sapiens	X	X	0		_	cyto	cyto	-	cytoplasm,cytosol,cytoskeleton	regulation of biological process,development,metabolic process,response to stimulus,transport	metal ion binding,protein binding		Troponin C family	EF-hand domains (4)
P67809	YBOX1_HUMAN	YBOX1_HUMAN	P67809	YBX1	Nuclease-sensitive element-binding protein 1	Homo sapiens	X	X	0		_	nucl	nucl	cyto,nucl,cyto,extr	spliceosomal complex,cytoplasm,nucleus,extracellular,organelle lumen	cell division,regulation of biological process,development,metabolic process,response to stimulus	catalytic activity,transcription regulator activity,DNA binding,protein binding,enzyme regulator activity,RNA binding	Cytoplasm. Nucleus. Cytoplasmic granule. Secreted.		CSD (cold-shock) domain (1)
P67936-2	TPM4_HUMAN	TPM4_HUMAN	P67936-2	TPM4	Isoform 2 of Tropomyosin alpha-4 chain	Homo sapiens	X	X	0		_	cyto	cyto	cyto	membrane,cytoplasm,cytosol,cytoskeleton	regulation of biological process,cellular component movement,response to stimulus,transport,cell communication	structural molecule activity,signal transducer activity,metal ion binding,protein binding	Cytoplasm > cytoskeleton.	Tropomyosin family
P68032	ACTC_HUMAN	ACTC_HUMAN	P68032	ACTC1	Actin, alpha cardiac muscle 1	Homo sapiens	X	X	0		_	cysk	cyto	cyto	cytoplasm,nucleus,cytosol,cytoskeleton	regulation of biological process,cell differentiation,cell division,reproduction,cellular component movement,development,cell organization and biogenesis,metabolic process,cell death,response to stimulus,transport	catalytic activity,nucleotide binding,structural molecule activity,protein binding	Cytoplasm > cytoskeleton.	Actin family
P68104		EF1A1_HUMAN	P68104	EEF1A1	Elongation factor 1-alpha 1	Homo sapiens		X	1		_	cyto	cyto	cyto	cytoplasm,nucleus,cytosol	regulation of biological process,metabolic process	translation regulator activity,catalytic activity,DNA binding,nucleotide binding,protein binding,RNA binding	Cytoplasm.	GTP-binding elongation factor family, EF-Tu/EF-1A subfamily
P68133		ACTS_HUMAN	P68133	ACTA1	Actin, alpha skeletal muscle	Homo sapiens		X	0		_	cysk	cyto	cyto	cytoplasm,cytosol,cytoskeleton	cell differentiation,development,cell organization and biogenesis,cell growth,cell death,response to stimulus,transport	catalytic activity,nucleotide binding,structural molecule activity,metal ion binding,protein binding,motor activity	Cytoplasm > cytoskeleton.	Actin family
P68363	TBA1B_HUMAN	TBAK_HUMAN	P68363	TUBA1B	Tubulin alpha-1B chain	Homo sapiens	X	X	0		_	cysk	cyto	cyto	membrane,Golgi,cytoplasm,endoplasmic reticulum,nucleus,extracellular,vacuole,mitochondrion,cytoskeleton,cell surface	defense response,cell differentiation,regulation of biological process,development,metabolic process,transport,cell communication,reproduction,cellular component movement,cell organization and biogenesis,cell proliferation,cell death,response to stimulus	catalytic activity,nucleotide binding,DNA binding,structural molecule activity,metal ion binding,signal transducer activity,protein binding,RNA binding,transporter activity,receptor activity	Cytoplasm > cytoskeleton.	Tubulin family
P68371	TBB2C_HUMAN	TBB2C_HUMAN	P68371	TUBB2C	Tubulin beta-2C chain	Homo sapiens	X	X	0		_	cyto_nucl	cyto	cyto	cytoplasm,cytosol,cytoskeleton	defense response,regulation of biological process,cell differentiation,cellular component movement,cell organization and biogenesis,metabolic process,cell death,response to stimulus,transport	catalytic activity,nucleotide binding,structural molecule activity,signal transducer activity,protein binding,motor activity	Cytoplasm > cytoskeleton.	Tubulin family
P68431	H31_HUMAN	H31_HUMAN	P68431	HIST1H3F	Histone H3.1	Homo sapiens	X	X	0		_	nucl	-	nucl,nucl	cytoplasm,cytosol,nucleus,mitochondrion,organelle lumen,chromosome,cytoskeleton	defense response,coagulation,regulation of biological process,cell differentiation,development,cell organization and biogenesis,metabolic process,cell death,response to stimulus,transport,cell communication	catalytic activity,nucleotide binding,DNA binding,metal ion binding,protein binding	Nucleus. Chromosome.	Histone H3 family
P68871		HBB_HUMAN	P68871	HBB	Hemoglobin subunit beta	Homo sapiens		X	0		_	cyto	cyto	-	membrane,ribosome,Golgi,cytoplasm,cytosol,extracellular,cell surface	defense response,coagulation,regulation of biological process,development,cell organization and biogenesis,metabolic process,cell death,response to stimulus,transport	catalytic activity,signal transducer activity,metal ion binding,protein binding,transporter activity,receptor activity		Globin family
P69905		HBA_HUMAN	P69905	HBA2	Hemoglobin subunit alpha	Homo sapiens		X	1		_	cyto	cyto	-	membrane,Golgi,ribosome,cytoplasm,cytosol,nucleus,extracellular,organelle lumen,chromosome	coagulation,regulation of biological process,development,cell organization and biogenesis,metabolic process,cell death,response to stimulus,transport	DNA binding,metal ion binding,protein binding,transporter activity		Globin family
P78330	SERB_HUMAN		P78330	PSPH	Phosphoserine phosphatase	Homo sapiens	X		0		_	cysk	-	-	membrane,cytoplasm	metabolic process,response to stimulus	catalytic activity,nucleotide binding,metal ion binding,protein binding		SerB family		Amino-acid biosynthesis; L-serine biosynthesis; L-serine from 3-phospho-D-glycerate: step 3/3.
P78347-4		GTF2I_HUMAN	P78347-4	GTF2I	Isoform 4 of General transcription factor II-I	Homo sapiens		X	0		_	nucl	nucl	cyto,nucl	cytoplasm,nucleus,organelle lumen	regulation of biological process,development,cell organization and biogenesis,metabolic process	transcription regulator activity,DNA binding,protein binding	Cytoplasm. Nucleus.	TFII-I family	GTF2I-like repeats (6)
P78371	TCPB_HUMAN	TCPB_HUMAN	P78371	CCT2	T-complex protein 1 subunit beta	Homo sapiens	X	X	1		_	cyto	cyto	cyto	cytoplasm,nucleus,cytosol,organelle lumen	regulation of biological process,metabolic process	catalytic activity,nucleotide binding,protein binding	Cytoplasm.	TCP-1 chaperonin family
P78527-2	PRKDC_HUMAN	PRKDC_HUMAN	P78527-2	PRKDC	Isoform 2 of DNA-dependent protein kinase catalytic subunit	Homo sapiens	X	X	13		n.a	cyto	nucl	nucl	nucleus,organelle lumen	cell differentiation,regulation of biological process,reproduction,cellular component movement,development,cell organization and biogenesis,metabolic process,cell death,response to stimulus	catalytic activity,nucleotide binding,DNA binding,protein binding	Nucleus.	PI3/PI4-kinase family	FAT domain (1); FATC domain (1); HEAT repeats (2); PI3K/PI4K domain (1); TPR repeats (3)
P78559-2		MAP1A_HUMAN	P78559-2		Isoform 2 of Microtubule-associated protein 1A	Homo sapiens		X	1		_	nucl	cyto	cyto	membrane,cytoplasm	reproduction	protein binding,RNA binding	Cytoplasm > cytoskeleton.	MAP1 family
P80723-1		BASP_HUMAN	P80723-1	BASP1	Brain acid soluble protein 1	Homo sapiens		X	0		_	nucl	plas	plas,plas	membrane,Golgi,cytoplasm,nucleus,extracellular,organelle lumen,cytoskeleton,chromosome	regulation of biological process,cell differentiation,development,cell organization and biogenesis,metabolic process,cell death,response to stimulus,transport	DNA binding,transcription regulator activity,signal transducer activity,protein binding,transporter activity,receptor activity	Cell membrane; Lipid-anchor. Cell projection > growth cone.	BASP1 family
P80723-2	BASP1_HUMAN		P80723-2	BASP1	Isoform 2 of Brain acid soluble protein 1	Homo sapiens	X		0		_	nucl	plas	plas,plas	membrane,cytoplasm,nucleus,organelle lumen,cytoskeleton	regulation of biological process,cell differentiation,development,metabolic process	transcription regulator activity,DNA binding,protein binding	Cell membrane; Lipid-anchor. Cell projection > growth cone.	BASP1 family
P82909	RT36_HUMAN		P82909	MRPS36	28S ribosomal protein S36, mitochondrial	Homo sapiens	X		0		M	mito	cyto	mito	ribosome,cytoplasm,mitochondrion,organelle lumen	metabolic process	structural molecule activity	Mitochondrion.
P82979		HCC1_HUMAN	P82979	SARNP	SAP domain-containing ribonucleoprotein	Homo sapiens		X	0		_	nucl	nucl	nucl	ribosome,cytoplasm,cytosol,nucleus	regulation of biological process,metabolic process,transport	DNA binding,metal ion binding,protein binding,RNA binding,transporter activity	Nucleus.		SAP domain (1)
P83731	RL24_HUMAN	RL24_HUMAN	P83731	RPL24	60S ribosomal protein L24	Homo sapiens	X	X	0		_	cyto	cyto	-	ribosome,cytoplasm,cytosol	defense response,cell differentiation,regulation of biological process,reproduction,development,cell organization and biogenesis,metabolic process,response to stimulus,transport,cell communication	translation regulator activity,catalytic activity,nucleotide binding,DNA binding,structural molecule activity,metal ion binding,protein binding,RNA binding		Ribosomal protein L24e family
P84077		ARF1_HUMAN	P84077	ARF1	ADP-ribosylation factor 1	Homo sapiens		X	0		_	cyto	cyto	golg,cyto	membrane,Golgi,cytoplasm,cytosol	defense response,regulation of biological process,development,cell organization and biogenesis,cellular homeostasis,cell proliferation,metabolic process,response to stimulus,transport,cell communication	catalytic activity,nucleotide binding,DNA binding,metal ion binding,signal transducer activity,protein binding,enzyme regulator activity,transporter activity	Golgi apparatus. Cytoplasm > perinuclear region.	Small GTPase superfamily, Arf family
P84090		ERH_HUMAN	P84090	ERH	Enhancer of rudimentary homolog	Homo sapiens		X	0		_	cyto	nucl	-	cytoplasm,nucleus,organelle lumen	regulation of biological process,metabolic process	catalytic activity,protein binding		E(R) family
P84098	RL19_HUMAN	RL19_HUMAN	P84098	RPL19	60S ribosomal protein L19	Homo sapiens	X	X	0		M	cyto	cyto	-	membrane,Golgi,ribosome,cytoplasm,cytosol,nucleus,extracellular,chromosome,cell surface	defense response,regulation of biological process,reproduction,development,cell organization and biogenesis,metabolic process,response to stimulus,transport,cell communication	translation regulator activity,catalytic activity,DNA binding,nucleotide binding,structural molecule activity,metal ion binding,protein binding,RNA binding		Ribosomal protein L19e family
P84103		SFRS3_HUMAN	P84103	SRSF3	Serine/arginine-rich splicing factor 3	Homo sapiens		X	0		_	nucl	nucl	nucl	membrane,cytoplasm,endoplasmic reticulum,nucleus,organelle lumen	cell organization and biogenesis,metabolic process,response to stimulus,transport	nucleotide binding,structural molecule activity,signal transducer activity,protein binding,RNA binding,receptor activity	Nucleus.	Splicing factor SR family	RRM (RNA recognition motif) domain (1)
P84243	H33_HUMAN	H33_HUMAN	P84243	LOC440926	Histone H3.3	Homo sapiens	X	X	0		_	nucl	-	nucl,nucl	cytoplasm,nucleus,organelle lumen,chromosome	coagulation,cell differentiation,regulation of biological process,development,cell organization and biogenesis,metabolic process,response to stimulus	catalytic activity,nucleotide binding,DNA binding,protein binding	Nucleus. Chromosome.	Histone H3 family
P98160	PGBM_HUMAN	PGBM_HUMAN	P98160	HSPG2	Basement membrane-specific heparan sulfate proteoglycan core protein	Homo sapiens	X	X	2	S	n.a	extr	plas	extr	membrane,extracellular	cell differentiation,development,cell organization and biogenesis,metabolic process	catalytic activity,nucleotide binding,structural molecule activity,metal ion binding,signal transducer activity,protein binding,receptor activity	Secreted > extracellular space > extracellular matrix > basement membrane.		EGF-like domains (4); Ig-like C2-type (immunoglobulin-like) domains (22); Laminin EGF-like domains (11); Laminin G-like domains (3); Laminin IV type A domains (3); LDL-receptor class A domains (4); SEA domain (1)
P98179	RBM3_HUMAN	RBM3_HUMAN	P98179	RBM3	Putative RNA-binding protein 3	Homo sapiens	X	X	0		_	nucl	nucl	nucl,cyto,plas	ribosome,cytoplasm,nucleus	regulation of biological process,metabolic process,response to stimulus	nucleotide binding,protein binding,RNA binding	Nucleus. Cytoplasm. Cell projection > dendrite.		RRM (RNA recognition motif) domain (1)
Q00325-2	MPCP_HUMAN	MPCP_HUMAN	Q00325-2	SLC25A3	Isoform B of Phosphate carrier protein, mitochondrial	Homo sapiens	X	X	4		M	nucl	cyto	mito	membrane,cytoplasm,mitochondrion	metabolic process,transport	transporter activity	Mitochondrion inner membrane; Multi-pass membrane protein.	Mitochondrial carrier family	Solcar repeats (3)
Q00341		VIGLN_HUMAN	Q00341	HDLBP	Vigilin	Homo sapiens		X	0		_	cyto	nucl	cyto,nucl	membrane,cytoplasm,nucleus,extracellular	regulation of biological process,metabolic process,transport	DNA binding,protein binding,RNA binding,transporter activity	Cytoplasm. Nucleus.		KH domains (14)
Q00577		PURA_HUMAN	Q00577	PURA	Transcriptional activator protein Pur-alpha	Homo sapiens		X	0		_	cyto	nucl	nucl	membrane,cytoplasm,nucleus,extracellular,mitochondrion,chromosome	regulation of biological process,cell differentiation,reproduction,development,cell organization and biogenesis,cell proliferation,metabolic process,cell death,response to stimulus,transport	catalytic activity,nucleotide binding,transcription regulator activity,DNA binding,metal ion binding,protein binding	Nucleus.	PUR DNA-binding protein family
Q00587-2	BORG5_HUMAN		Q00587-2	CDC42EP1	Isoform 2 of Cdc42 effector protein 1	Homo sapiens	X		0		M	mito	extr	endo,cyto	membrane,Golgi,ribosome,cytoplasm,cytoskeleton	regulation of biological process,cell organization and biogenesis,metabolic process,cell communication	structural molecule activity,protein binding	Endomembrane system; Peripheral membrane protein. Cytoplasm > cytoskeleton.	BORG/CEP family	CRIB domain (1)
Q00610-2	CLH1_HUMAN	CLH1_HUMAN	Q00610-2	CLTC	Isoform 2 of Clathrin heavy chain 1	Homo sapiens	X	X	1		_	cyto	plas	cyve,plas,cyve	membrane,Golgi,cytoplasm,cytosol,mitochondrion,cytoskeleton	regulation of biological process,cell differentiation,development,cell organization and biogenesis,metabolic process,response to stimulus,transport,cell communication	catalytic activity,structural molecule activity,protein binding,transporter activity	Cytoplasmic vesicle membrane; Peripheral membrane protein; Cytoplasmic side. Membrane > coated pit; Peripheral membrane protein; Cytoplasmic side. Melanosome.	Clathrin heavy chain family
Q00688	FKBP3_HUMAN	FKBP3_HUMAN	Q00688	FKBP3	Peptidyl-prolyl cis-trans isomerase FKBP3	Homo sapiens	X	X	0		_	cyto	nucl	nucl	cytoplasm,nucleus	metabolic process	catalytic activity,signal transducer activity,protein binding,receptor activity	Nucleus.	FKBP-type PPIase family	PPIase FKBP-type domain (1)
Q00839-2	HNRPU_HUMAN	HNRPU_HUMAN	Q00839-2	HNRNPU	Isoform Short of Heterogeneous nuclear ribonucleoprotein U	Homo sapiens	X	X	0		_	nucl	nucl	nucl,cyto,plas	spliceosomal complex,cytoplasm,nucleus,organelle lumen,cell surface	regulation of biological process,metabolic process	catalytic activity,DNA binding,nucleotide binding,protein binding,RNA binding	Nucleus. Cytoplasm. Cell surface.		B30.2/SPRY domain (1); SAP domain (1)
Q01081		U2AF1_HUMAN	Q01081	U2AF1	Splicing factor U2AF 35 kDa subunit	Homo sapiens		X	0		_	nucl	nucl	nucl,nucl	spliceosomal complex,membrane,cytoplasm,nucleus,organelle lumen,cell surface	regulation of biological process,cell organization and biogenesis,metabolic process,transport	catalytic activity,nucleotide binding,metal ion binding,protein binding,RNA binding	Nucleus. Nucleus speckle.	Splicing factor SR family	C3H1-type zinc fingers (2); RRM (RNA recognition motif) domain (1)
Q01082-3	SPTB2_HUMAN	SPTB2_HUMAN	Q01082-3	SPTBN1	Isoform 2 of Spectrin beta chain, brain 1	Homo sapiens	X	X	1		_	cyto	plas	cyto,cyto,plas	membrane,cytoplasm,cytosol,nucleus,organelle lumen,cytoskeleton	regulation of biological process,cell differentiation,development,cell organization and biogenesis,metabolic process,response to stimulus,transport,cell communication	structural molecule activity,protein binding	Cytoplasm > cytoskeleton. Cytoplasm > myofibril > sarcomere > M-band. Cell membrane; Peripheral membrane protein; Cytoplasmic side.	Spectrin family	CH (calponin-homology) domains (2); PH domain (1); Spectrin repeats (17)
Q01105-1	SET_HUMAN	SET_HUMAN	Q01105-1	SET	Protein SET	Homo sapiens	X	X	0		_	nucl	nucl	cyto,E.R.,nucl	cytoplasm,endoplasmic reticulum,nucleus,cytosol,organelle lumen	regulation of biological process,cell differentiation,cell organization and biogenesis,metabolic process,cell death,transport	catalytic activity,transcription regulator activity,nucleotide binding,metal ion binding,protein binding,enzyme regulator activity	Cytoplasm > cytosol. Endoplasmic reticulum. Nucleus > nucleoplasm.	Nucleosome assembly protein (NAP) family
Q01484-7		ANK2_HUMAN	Q01484-7	ANK2	Isoform 5 of Ankyrin-2	Homo sapiens		X	0		_	nucl	plas	cyto,plas,cyto,plas,plas	membrane,cytoplasm,cytosol,cytoskeleton	regulation of biological process,cell differentiation,development,cell organization and biogenesis,metabolic process,response to stimulus,cell communication	catalytic activity,structural molecule activity,protein binding	Cytoplasm > cytoskeleton. Membrane. Cytoplasm > myofibril > sarcomere > M-band. Apical cell membrane. Cell membrane.		ANK repeats (24); Death domain (1); ZU5 domain (1)
Q01518-2		CAP1_HUMAN	Q01518-2	CAP1	Isoform 2 of Adenylyl cyclase-associated protein 1	Homo sapiens		X	0		_	cyto	plas	plas	membrane,cytoplasm,cytoskeleton	coagulation,regulation of biological process,cell differentiation,cellular component movement,development,cell organization and biogenesis,metabolic process,response to stimulus,transport,cell communication	protein binding	Cell membrane; Peripheral membrane protein.	CAP family	C-CAP/cofactor C-like domain (1)
Q01844-2		EWS_HUMAN	Q01844-2	EWSR1	Isoform EWS-B of RNA-binding protein EWS	Homo sapiens		X	0		_	nucl	nucl	nucl,cyto,plas	membrane,cytoplasm,nucleus,cell surface	regulation of biological process,metabolic process	nucleotide binding,DNA binding,metal ion binding,protein binding,RNA binding	Nucleus. Cytoplasm. Cell membrane.	RRM TET family	IQ domain (1); RanBP2-type zinc finger (1); RRM (RNA recognition motif) domain (1)
Q01995	TAGL_HUMAN	TAGL_HUMAN	Q01995	TAGLN	Transgelin	Homo sapiens	X	X	0		_	cyto	cyto	cyto	cytoplasm	development,cell organization and biogenesis	protein binding	Cytoplasm.	Calponin family	Calponin-like repeat (1); CH (calponin-homology) domain (1)
Q02543		RL18A_HUMAN	Q02543	RPL18A	60S ribosomal protein L18a	Homo sapiens		X	0		_	nucl	cyto	-	membrane,ribosome,cytoplasm,cytosol,nucleus	regulation of biological process,reproduction,development,cell organization and biogenesis,metabolic process,response to stimulus	catalytic activity,nucleotide binding,transcription regulator activity,structural molecule activity,metal ion binding,protein binding,RNA binding		Ribosomal protein L18Ae family
Q02809		PLOD1_HUMAN	Q02809	PLOD1	Procollagen-lysine,2-oxoglutarate 5-dioxygenase 1	Homo sapiens		X	0	S	S	extr	cyto	E.R.	membrane,cytoplasm,endoplasmic reticulum,extracellular,cytoskeleton	regulation of biological process,development,metabolic process,response to stimulus,transport	catalytic activity,nucleotide binding,metal ion binding,protein binding	Rough endoplasmic reticulum membrane; Peripheral membrane protein; Lumenal side.		Fe2OG dioxygenase domain (1)
Q02878	RL6_HUMAN	RL6_HUMAN	Q02878	RPL6	60S ribosomal protein L6	Homo sapiens	X	X	1		_	cyto	cyto	-	ribosome,cytoplasm,nucleus,cytosol,chromosome	regulation of biological process,reproduction,development,cell organization and biogenesis,metabolic process,response to stimulus,transport,cell communication	translation regulator activity,catalytic activity,DNA binding,nucleotide binding,structural molecule activity,metal ion binding,protein binding,RNA binding		Ribosomal protein L6e family
Q02952-3	AKA12_HUMAN	AKA12_HUMAN	Q02952-3	AKAP12	Isoform 3 of A-kinase anchor protein 12	Homo sapiens	X	X	0		_	nucl	cyto	cyto,cyto	membrane,cytoplasm,cytoskeleton	regulation of biological process,metabolic process,transport,cell communication	protein binding	Cytoplasm > cell cortex. Cytoplasm > cytoskeleton.		AKAP domains (3)
Q03135-2	CAV1_HUMAN	CAV1_HUMAN	Q03135-2	CAV1	Isoform Beta of Caveolin-1	Homo sapiens	X	X	0		_	cyto	plas	golg,plas,plas,plas	membrane,Golgi,cytoplasm,endoplasmic reticulum,cytosol,mitochondrion,cell surface	coagulation,cell differentiation,regulation of biological process,development,cellular homeostasis,metabolic process,transport,cell communication,reproduction,cellular component movement,cell organization and biogenesis,cell proliferation,response to stimulus	structural molecule activity,protein binding,enzyme regulator activity	Golgi apparatus membrane; Peripheral membrane protein. Cell membrane; Peripheral membrane protein. Membrane > caveola; Peripheral membrane protein. Membrane raft.	Caveolin family
Q03252	LMNB2_HUMAN	LMNB2_HUMAN	Q03252	LMNB2	Lamin-B2	Homo sapiens	X	X	1		M	nucl	nucl	nucl	membrane,nucleus,organelle lumen,cytoskeleton	metabolic process	catalytic activity,structural molecule activity,motor activity	Nucleus inner membrane; Lipid-anchor; Nucleoplasmic side.	Intermediate filament family
Q04637-6		IF4G1_HUMAN	Q04637-6	EIF4G1	Isoform E of Eukaryotic translation initiation factor 4 gamma 1	Homo sapiens		X	1		_	nucl	cyto	-	cytoplasm,cytosol	cell differentiation,regulation of biological process,cell organization and biogenesis,metabolic process,response to stimulus	translation regulator activity,protein binding,RNA binding		EIF4G family	MI domain (1); MIF4G domain (1); W2 domain (1)
Q05048		CSTF1_HUMAN	Q05048	CSTF1	Cleavage stimulation factor subunit 1	Homo sapiens		X	0		_	cyto_nucl	nucl	nucl	cytoplasm,nucleus,organelle lumen	regulation of biological process,cell organization and biogenesis,metabolic process,response to stimulus	catalytic activity,transcription regulator activity,DNA binding,protein binding,RNA binding	Nucleus.		WD repeats (6)
Q05519		SFR11_HUMAN	Q05519	SRSF11	Serine/arginine-rich splicing factor 11	Homo sapiens		X	0		_	nucl	nucl	nucl	membrane,cytoplasm,nucleus,organelle lumen,chromosome	regulation of biological process,cell organization and biogenesis,metabolic process,transport	catalytic activity,nucleotide binding,protein binding,RNA binding,transporter activity	Nucleus.	Splicing factor SR family	RRM (RNA recognition motif) domain (1)
Q05682-5	CALD1_HUMAN	CALD1_HUMAN	Q05682-5	CALD1	Isoform 5 of Caldesmon	Homo sapiens	X	X	0		_	nucl	cyto	cyto,cyto	membrane,cytoplasm,cytosol,cytoskeleton	regulation of biological process,cellular component movement,cell organization and biogenesis	catalytic activity,metal ion binding,protein binding	Cytoplasm > cytoskeleton. Cytoplasm > myofibril.	Caldesmon family
Q06830	PRDX1_HUMAN	PRDX1_HUMAN	Q06830	PRDX1	Peroxiredoxin-1	Homo sapiens	X	X	1		_	cyto	cyto	cyto,cyve	membrane,cytoplasm,nucleus,extracellular,mitochondrion	defense response,regulation of biological process,development,cellular homeostasis,cell proliferation,metabolic process,cell death,response to stimulus,transport,cell communication	catalytic activity,DNA binding,antioxidant activity,protein binding	Cytoplasm. Melanosome.	AhpC/TSA family	Thioredoxin domain (1)
Q07020	RL18_HUMAN	RL18_HUMAN	Q07020	RPL18	60S ribosomal protein L18	Homo sapiens	X	X	0		_	cyto	cyto	cyto	ribosome,cytoplasm,cytosol	regulation of biological process,reproduction,development,cell organization and biogenesis,metabolic process,response to stimulus,transport,cell communication	translation regulator activity,catalytic activity,DNA binding,nucleotide binding,structural molecule activity,metal ion binding,protein binding,RNA binding	Cytoplasm.	Ribosomal protein L18e family
Q07021	C1QBP_HUMAN		Q07021	C1QBP	Complement component 1 Q subcomponent-binding protein, mitochondrial	Homo sapiens	X		0		M	mito	cyto	mito,nucl	membrane,cytoplasm,nucleus,extracellular,mitochondrion,organelle lumen	defense response,coagulation,metabolic process,response to stimulus	catalytic activity,protein binding	Mitochondrion matrix. Nucleus.	MAM33 family
Q07065-2	CKAP4_HUMAN		Q07065-2	CKAP4	Isoform 2 of Cytoskeleton-associated protein 4	Homo sapiens	X		0		_	plas	cyto	E.R._golg	membrane,cytoplasm,endoplasmic reticulum	regulation of biological process,cell organization and biogenesis,transport,cell communication	signal transducer activity,receptor activity	Endoplasmic reticulum-Golgi intermediate compartment membrane; Single-pass membrane protein.
Q07666-1		SAM68_HUMAN	Q07666-1	KHDRBS1	KH domain-containing, RNA-binding, signal transduction-associated protein 1	Homo sapiens		X	0		M	cyto	nucl	nucl,plas	membrane,cytoplasm,nucleus,extracellular	coagulation,regulation of biological process,cell organization and biogenesis,cell proliferation,metabolic process,response to stimulus,transport,cell communication	catalytic activity,DNA binding,transcription regulator activity,signal transducer activity,protein binding,RNA binding,transporter activity	Nucleus. Membrane.	KHDRBS family	KH domain (1)
Q07954	LRP1_HUMAN		Q07954	LRP1	Prolow-density lipoprotein receptor-related protein 1	Homo sapiens	X		1	S	n.a	plas	plas	plas,plas,plas,plas,cyto,nucl	membrane,endosome,cytoplasm,nucleus,cell surface	regulation of biological process,development,cell organization and biogenesis,metabolic process,cell proliferation,transport,cell communication	signal transducer activity,metal ion binding,protein binding,transporter activity,receptor activity	Cell membrane; Single-pass type I membrane protein. Membrane > coated pit. Cell membrane; Peripheral membrane protein; Extracellular side. Membrane > coated pit. Cytoplasm. Nucleus.	LDLR family	EGF-like domains (22); LDL-receptor class A domains (31); LDL-receptor class B repeats (34)
Q07955-3		SFRS1_HUMAN	Q07955-3	SRSF1	Isoform ASF-3 of Serine/arginine-rich splicing factor 1	Homo sapiens		X	0		_	nucl	nucl	cyto,nucl	spliceosomal complex,cytoplasm,nucleus,organelle lumen	development,cell organization and biogenesis,metabolic process,transport	nucleotide binding,protein binding,RNA binding	Cytoplasm. Nucleus speckle.	Splicing factor SR family	RRM (RNA recognition motif) domains (2)
Q08211	DHX9_HUMAN	DHX9_HUMAN	Q08211	DHX9	ATP-dependent RNA helicase A	Homo sapiens	X	X	5		_	nucl	nucl	nucl,cyto	membrane,cytoplasm,nucleus,mitochondrion,organelle lumen,cytoskeleton	cell differentiation,regulation of biological process,cell organization and biogenesis,metabolic process,response to stimulus,transport	catalytic activity,nucleotide binding,DNA binding,metal ion binding,protein binding,RNA binding	Nucleus > nucleolus. Cytoplasm.	DEAD box helicase family, DEAH subfamily	DRBM (double-stranded RNA-binding) domains (2); Helicase ATP-binding domain (1); Helicase C-terminal domain (1)
Q08431-3	MFGM_HUMAN		Q08431-3	MFGE8	Isoform 3 of Lactadherin	Homo sapiens	X		0	S	S	extr	extr	plas,extr	membrane,cytoplasm,extracellular,cell surface	regulation of biological process,reproduction,cell organization and biogenesis,cell proliferation,response to stimulus,transport	signal transducer activity,metal ion binding,protein binding	Membrane; Peripheral membrane protein. Secreted.		EGF-like domain (1); F5/8 type C domains (2)
Q09028-4		RBBP4_HUMAN	Q09028-4	RBBP4	Isoform 4 of Histone-binding protein RBBP4	Homo sapiens		X	0		_	cyto_nucl	nucl	nucl	nucleus,organelle lumen,chromosome	regulation of biological process,cell organization and biogenesis,metabolic process,cell proliferation	catalytic activity,protein binding	Nucleus.	WD repeat RBAP46/RBAP48/MSI1 family	WD repeats (6)
Q09666	AHNK_HUMAN	AHNK_HUMAN	Q09666	AHNAK	Neuroblast differentiation-associated protein AHNAK	Homo sapiens	X	X	0		n.a	nucl	nucl	nucl	membrane,cytoplasm,nucleus,cytosol,organelle lumen,cytoskeleton	regulation of biological process,development,cell organization and biogenesis,metabolic process	catalytic activity,nucleotide binding,metal ion binding,signal transducer activity,protein binding,receptor activity	Nucleus.		PDZ (DHR) domain (1)
Q0ZGT2-3	NEXN_HUMAN		Q0ZGT2-3	NEXN	Isoform 3 of Nexilin	Homo sapiens	X		0		_	nucl	plas	cyto,plas,cyto	membrane,cytoplasm,cytoskeleton	regulation of biological process,cellular component movement,cell organization and biogenesis	protein binding	Cytoplasm > cytoskeleton. Cell junction > adherens junction. Cytoplasm > myofibril > sarcomere > Z-disk.		Ig-like (immunoglobulin-like) domain (1)
Q12797-4		ASPH_HUMAN	Q12797-4	ASPH	Isoform Junctin-2 of Aspartyl/asparaginyl beta-hydroxylase	Homo sapiens		X	0	S	M	plas	cyto	E.R.	membrane,cytoplasm,endoplasmic reticulum	regulation of biological process,development,metabolic process,cell proliferation	catalytic activity,structural molecule activity,metal ion binding	Endoplasmic reticulum membrane; Single-pass type II membrane protein.	Aspartyl/asparaginyl beta-hydroxylase family	TPR repeats (4)
Q12874		SF3A3_HUMAN	Q12874	SF3A3	Splicing factor 3A subunit 3	Homo sapiens		X	0		_	cyto	nucl	nucl	spliceosomal complex,nucleus,organelle lumen	cell differentiation,cell organization and biogenesis,metabolic process	metal ion binding,protein binding,RNA binding	Nucleus speckle.	SF3A3 family	Matrin-type zinc finger (1)
Q12888-2		TP53B_HUMAN	Q12888-2	TP53BP1	Isoform 2 of Tumor suppressor p53-binding protein 1	Homo sapiens		X	1		_	nucl	nucl	nucl,nucl	membrane,cytoplasm,nucleus,organelle lumen,chromosome	regulation of biological process,metabolic process,response to stimulus	transcription regulator activity,DNA binding,protein binding	Nucleus. Chromosome > centromere > kinetochore.		BRCT domains (2)
Q12904	AIMP1_HUMAN	MCA1_HUMAN	Q12904	AIMP1	Aminoacyl tRNA synthase complex-interacting multifunctional protein 1	Homo sapiens	X	X	0		_	cyto	extr	nucl,cyto,cyve,extr,E.R.,golg	membrane,Golgi,cytoplasm,cytosol,nucleus,endoplasmic reticulum,extracellular	defense response,regulation of biological process,cellular component movement,cell proliferation,metabolic process,cell death,response to stimulus,transport,cell communication	signal transducer activity,protein binding,RNA binding	Nucleus. Cytoplasm > cytosol. Cytoplasmic vesicle > secretory vesicle. Secreted. Endoplasmic reticulum. Golgi apparatus.		TRNA-binding domain (1)
Q12905	ILF2_HUMAN	ILF2_HUMAN	Q12905	ILF2	Interleukin enhancer-binding factor 2	Homo sapiens	X	X	2		_	cyto	nucl	nucl,cyto	membrane,cytoplasm,nucleus,extracellular,organelle lumen	defense response,regulation of biological process,cell differentiation,development,metabolic process,cell proliferation,cell death,response to stimulus,transport,cell communication	catalytic activity,DNA binding,nucleotide binding,transcription regulator activity,signal transducer activity,protein binding,RNA binding,receptor activity	Nucleus > nucleolus. Cytoplasm.		DZF domain (1)
Q12906-6	ILF3_HUMAN	ILF3_HUMAN	Q12906-6	ILF3	Isoform 6 of Interleukin enhancer-binding factor 3	Homo sapiens	X	X	0		_	nucl	nucl	nucl,cyto	cytoplasm,nucleus,mitochondrion,organelle lumen	regulation of biological process,metabolic process	catalytic activity,DNA binding,transcription regulator activity,protein binding,RNA binding	Nucleus > nucleolus. Cytoplasm.		DRBM (double-stranded RNA-binding) domains (2); DZF domain (1)
Q12929		EPS8_HUMAN	Q12929	EPS8	Epidermal growth factor receptor kinase substrate 8	Homo sapiens		X	0		_	nucl	plas	-	membrane,Golgi,cytoplasm,cytoskeleton	regulation of biological process,cell organization and biogenesis,metabolic process,cell proliferation,response to stimulus,cell communication	catalytic activity,nucleotide binding,signal transducer activity,protein binding,receptor activity		EPS8 family	PH domain (1); SH3 domain (1)
Q12988	HSPB3_HUMAN		Q12988	HSPB3	Heat shock protein beta-3	Homo sapiens	X		0		_	cyto	-	cyto,nucl	cytoplasm,nucleus	metabolic process,cell death,response to stimulus	catalytic activity,nucleotide binding,metal ion binding	Cytoplasm. Nucleus.	Small heat shock protein (HSP20) family
Q12996		CSTF3_HUMAN	Q12996	CSTF3	Cleavage stimulation factor subunit 3	Homo sapiens		X	0		_	cyto	nucl	nucl	membrane,cytoplasm,nucleus,organelle lumen,cytoskeleton	regulation of biological process,cell organization and biogenesis,cell proliferation,metabolic process,response to stimulus	catalytic activity,nucleotide binding,DNA binding,transcription regulator activity,metal ion binding,protein binding,RNA binding	Nucleus.		HAT repeats (9)
Q13148-3		TADBP_HUMAN	Q13148-3	TARDBP	Isoform 3 of TAR DNA-binding protein 43	Homo sapiens		X	0		_	nucl	nucl	nucl	nucleus,organelle lumen	regulation of biological process,reproduction,metabolic process,cell death	nucleotide binding,DNA binding,protein binding,RNA binding	Nucleus.		RRM (RNA recognition motif) domains (2)
Q13151	ROA0_HUMAN	ROA0_HUMAN	Q13151	HNRNPA0	Heterogeneous nuclear ribonucleoprotein A0	Homo sapiens	X	X	0		_	nucl	nucl	nucl	cytoplasm,nucleus,extracellular,organelle lumen,cytoskeleton	cell organization and biogenesis,metabolic process	catalytic activity,nucleotide binding,metal ion binding,protein binding,RNA binding	Nucleus.		RRM (RNA recognition motif) domains (2)
Q13162	PRDX4_HUMAN		Q13162	PRDX4	Peroxiredoxin-4	Homo sapiens	X		1	S	S	extr	cyto	cyto,extr	cytoplasm,extracellular,mitochondrion	regulation of biological process,cellular homeostasis,metabolic process,cell communication	catalytic activity,antioxidant activity	Cytoplasm. Secreted.	AhpC/TSA family	Thioredoxin domain (1)
Q13185	CBX3_HUMAN	CBX3_HUMAN	Q13185	C15orf57	Chromobox protein homolog 3	Homo sapiens	X	X	0		_	nucl	nucl	nucl	membrane,nucleus,chromosome,cytoskeleton	regulation of biological process,cell organization and biogenesis,metabolic process	catalytic activity,DNA binding,transcription regulator activity,metal ion binding,protein binding	Nucleus.		Chromo domains (2)
Q13200	PSMD2_HUMAN	PSMD2_HUMAN	Q13200	PSMD2	26S proteasome non-ATPase regulatory subunit 2	Homo sapiens	X	X	4		_	plas	cyto	-	proteasome,membrane,cytoplasm,cytosol	regulation of biological process,metabolic process,cell death,response to stimulus,transport	metal ion binding,protein binding,enzyme regulator activity		Proteasome subunit S2 family	PC repeats (7)
Q13203	MYBPH_HUMAN	MYBPH_HUMAN	Q13203	MYBPH	Myosin-binding protein H	Homo sapiens	X	X	0		_	cyto_nucl	cyto	-	cytoplasm,cytoskeleton	regulation of biological process	structural molecule activity,protein binding		Immunoglobulin superfamily, MyBP family	Fibronectin type-III domains (2); Ig-like C2-type (immunoglobulin-like) domains (2)
Q13263-2	TIF1B_HUMAN	TIF1B_HUMAN	Q13263-2	TRIM28	Isoform 2 of Transcription intermediary factor 1-beta	Homo sapiens	X	X	0	S	M	nucl	nucl	nucl	membrane,nucleus,organelle lumen,chromosome	regulation of biological process,cell differentiation,development,cell organization and biogenesis,metabolic process,response to stimulus,transport,cell communication	catalytic activity,transcription regulator activity,DNA binding,metal ion binding,protein binding,transporter activity	Nucleus.	TRIM/RBCC family	B box-type zinc fingers (2); Bromo domain (1); PHD-type zinc finger (1); RING-type zinc finger (1)
Q13283		G3BP_HUMAN	Q13283	G3BP1	Ras GTPase-activating protein-binding protein 1	Homo sapiens		X	0		_	cyto	nucl	cyto,cyto,plas,nucl	membrane,cytoplasm,nucleus,cytosol	defense response,regulation of biological process,reproduction,cellular homeostasis,metabolic process,response to stimulus,transport,cell communication	catalytic activity,DNA binding,nucleotide binding,metal ion binding,protein binding,RNA binding,transporter activity	Cytoplasm. Cytoplasm > cytosol. Cell membrane. Nucleus.		NTF2 domain (1); RRM (RNA recognition motif) domain (1)
Q13330-2		MTA1_HUMAN	Q13330-2	MTA1	Isoform Short of Metastasis-associated protein MTA1	Homo sapiens		X	0		_	nucl	nucl	cyto,nucl	cytoplasm,nucleus,organelle lumen	regulation of biological process,metabolic process	DNA binding,metal ion binding,protein binding	Cytoplasm. Nucleus.		BAH domain (1); ELM2 domain (1); GATA-type zinc finger (1); SANT domain (1)
Q13409-6		DC1I2_HUMAN	Q13409-6	DYNC1I2	Isoform 2F of Cytoplasmic dynein 1 intermediate chain 2	Homo sapiens		X	0		_	nucl	cyto	cyto	cytoplasm,cytosol,cytoskeleton	metabolic process,transport	catalytic activity,metal ion binding,protein binding,motor activity	Cytoplasm > cytoskeleton.	Dynein intermediate chain family	WD repeats (7)
Q13418		ILK1_HUMAN	Q13418	ILK	Integrin-linked protein kinase	Homo sapiens		X	0		_	cyto	plas	plas,plas	membrane,cytoplasm,cytosol,extracellular,cytoskeleton	defense response,cell differentiation,regulation of biological process,development,cellular homeostasis,metabolic process,cell communication,reproduction,cellular component movement,cell organization and biogenesis,cell growth,cell proliferation,cell death,response to stimulus	catalytic activity,nucleotide binding,DNA binding,transcription regulator activity,metal ion binding,signal transducer activity,protein binding,receptor activity	Cell junction > focal adhesion. Cell membrane; Peripheral membrane protein; Cytoplasmic side.	Protein kinase superfamily, TKL Ser/Thr protein kinase family	ANK repeats (5); Protein kinase domain (1)
Q13423	NNTM_HUMAN		Q13423	NNT	NAD(P) transhydrogenase, mitochondrial	Homo sapiens	X		14		M	plas	cyto	mito	membrane,cytoplasm,mitochondrion	regulation of biological process,metabolic process,cell death,transport	catalytic activity,nucleotide binding,metal ion binding,transporter activity	Mitochondrion inner membrane; Multi-pass membrane protein; Matrix side.	AlaDH/PNT family; PNT beta subunit family
Q13428-8		TCOF_HUMAN	Q13428-8	TCOF1	Isoform 8 of Treacle protein	Homo sapiens		X	0		M	nucl	nucl	nucl	nucleus,organelle lumen	development,metabolic process,transport	protein binding,transporter activity	Nucleus > nucleolus.		LisH domain (1)
Q13435		SF3B2_HUMAN	Q13435	SF3B2	Splicing factor 3B subunit 2	Homo sapiens		X	0		_	nucl	nucl	nucl	spliceosomal complex,nucleus,organelle lumen,cytoskeleton	metabolic process	DNA binding,protein binding	Nucleus.		SAP domain (1)
Q13501-2		SQSTM_HUMAN	Q13501-2	SQSTM1	Isoform 2 of Sequestosome-1	Homo sapiens		X	0		_	nucl	cyto	cyto,endo,nucl	endosome,cytoplasm,cytosol,nucleus,organelle lumen	cell differentiation,regulation of biological process,metabolic process,cell death,response to stimulus,transport,cell communication	metal ion binding,protein binding	Cytoplasm. Late endosome. Nucleus.		OPR domain (1); UBA domain (1); ZZ-type zinc finger (1)
Q13509	TBB4_HUMAN,TBB3_HUMAN	TBB4_HUMAN,TBB3_HUMAN	Q13509	TUBB3	Tubulin beta-3 chain	Homo sapiens	X	X	0		_	cyto	cyto	cyto	membrane,Golgi,endosome,cytoplasm,extracellular,mitochondrion,cytoskeleton	cell differentiation,regulation of biological process,development,cell organization and biogenesis,metabolic process,response to stimulus,transport,cell communication	catalytic activity,nucleotide binding,structural molecule activity,signal transducer activity,protein binding,enzyme regulator activity,receptor activity	Cytoplasm > cytoskeleton.	Tubulin family
Q13561-3		DCTN2_HUMAN	Q13561-3	DCTN2	Isoform 3 of Dynactin subunit 2	Homo sapiens		X	0		_	cyto	cyto	cyto,plas	membrane,cytoplasm,cytosol,chromosome,cytoskeleton	cell organization and biogenesis,cell proliferation	catalytic activity,protein binding,motor activity	Cytoplasm > cytoskeleton > centrosome. Membrane; Peripheral membrane protein.	Dynactin subunit 2 family
Q13683-9	ITA7_HUMAN		Q13683-9	ITGA7	Isoform Alpha-7X2DB of Integrin alpha-7	Homo sapiens	X		2	S	S	plas	plas	plas	membrane,cytoplasm,nucleus,extracellular,organelle lumen	development	metal ion binding,signal transducer activity,protein binding,receptor activity	Membrane; Single-pass type I membrane protein.	Integrin alpha chain family	FG-GAP repeats (7)
Q13813-3	SPTA2_HUMAN	SPTA2_HUMAN	Q13813-3	SPTAN1	Isoform 3 of Spectrin alpha chain, brain	Homo sapiens	X	X	0		_	nucl	plas	cyto,cyto	membrane,cytoplasm,cytosol,cytoskeleton	cell differentiation,regulation of biological process,development,cell organization and biogenesis,cell death,response to stimulus	structural molecule activity,metal ion binding,protein binding	Cytoplasm > cytoskeleton. Cytoplasm > cell cortex.	Spectrin family	EF-hand domains (3); SH3 domain (1); Spectrin repeats (23)
Q13838-2	UAP56_HUMAN	UAP56_HUMAN	Q13838-2	DDX39B	Isoform 2 of Spliceosome RNA helicase BAT1	Homo sapiens	X	X	1		_	cyto_nucl	nucl	nucl,nucl	membrane,spliceosomal complex,nucleus,organelle lumen	reproduction,cell organization and biogenesis,metabolic process,transport	catalytic activity,nucleotide binding,metal ion binding,protein binding,RNA binding,transporter activity	Nucleus. Nucleus speckle.	DEAD box helicase family, DECD subfamily	Helicase ATP-binding domain (1); Helicase C-terminal domain (1)
Q13884-2		SNTB1_HUMAN	Q13884-2	SNTB1	Isoform 2 of Beta-1-syntrophin	Homo sapiens		X	0	S	M	nucl	plas	plas,plas,cyto	membrane,cytoplasm,cytoskeleton		metal ion binding,protein binding	Cell membrane > sarcolemma; Peripheral membrane protein; Cytoplasmic side. Cell junction. Cytoplasm > cytoskeleton.	Syntrophin family	PDZ (DHR) domain (1); PH domains (2); SU (syntrophin unique) domain (1)
Q14103-4	HNRPD_HUMAN	HNRPD_HUMAN	Q14103-4	HNRNPD	Isoform 4 of Heterogeneous nuclear ribonucleoprotein D0	Homo sapiens	X	X	0	S	_	nucl	nucl	nucl,cyto	cytoplasm,cytosol,nucleus,organelle lumen,chromosome	regulation of biological process,cell organization and biogenesis,metabolic process,response to stimulus	transcription regulator activity,nucleotide binding,DNA binding,protein binding,RNA binding	Nucleus. Cytoplasm.		RRM (RNA recognition motif) domains (2)
Q14108	SCRB2_HUMAN		Q14108	SCARB2	Lysosome membrane protein 2	Homo sapiens	X		1	S	S	E.R.	plas	lyso	membrane,cytoplasm,extracellular,vacuole	defense response,response to stimulus	signal transducer activity,protein binding,receptor activity	Lysosome membrane; Multi-pass membrane protein.	CD36 family
Q14137		BOP1_HUMAN	Q14137	BOP1	Ribosome biogenesis protein BOP1	Homo sapiens		X	0		M	nucl	nucl	nucl,nucl	nucleus,organelle lumen	regulation of biological process,cell organization and biogenesis,cell proliferation,metabolic process	catalytic activity,metal ion binding,protein binding	Nucleus > nucleolus. Nucleus > nucleoplasm.	WD repeat BOP1/ERB1 family	WD repeats (7)
Q14152	EIF3A_HUMAN	IF3A_HUMAN	Q14152	EIF3A	Eukaryotic translation initiation factor 3 subunit A	Homo sapiens	X	X	0		_	nucl	cyto	cyto	ribosome,cytoplasm,nucleus,cytosol	regulation of biological process,cell differentiation,cell organization and biogenesis,metabolic process	translation regulator activity,catalytic activity,structural molecule activity,metal ion binding,protein binding,RNA binding	Cytoplasm.	EIF-3 subunit A family	PCI domain (1)
Q14161-9		GIT2_HUMAN	Q14161-9	GIT2	Isoform 9 of ARF GTPase-activating protein GIT2	Homo sapiens		X	0		_	nucl	nucl	-	nucleus,organelle lumen	regulation of biological process,metabolic process	metal ion binding,protein binding,enzyme regulator activity			ANK repeats (3); Arf-GAP domain (1)
Q14165	MLEC_HUMAN		Q14165	MLEC	Malectin	Homo sapiens	X		0	S	S	plas	plas	E.R.	membrane,cytoplasm,endoplasmic reticulum,extracellular	metabolic process,transport		Endoplasmic reticulum membrane; Single-pass type I membrane protein.	Malectin family
Q14192		FHL2_HUMAN	Q14192	FHL2	Four and a half LIM domains protein 2	Homo sapiens		X	0		_	nucl	nucl	cyto,nucl	membrane,cytoplasm,nucleus,cytosol,extracellular,cytoskeleton	cell differentiation,cell division,regulation of biological process,development,cell proliferation,metabolic process,response to stimulus,cell communication	transcription regulator activity,signal transducer activity,metal ion binding,protein binding	Cytoplasm. Nucleus.		LIM zinc-binding domains (4)
Q14203-1		DYNA_HUMAN	Q14203-1	DCTN1	Dynactin subunit 1	Homo sapiens		X	2		M	plas	cyto	cyto,cyto	membrane,cytoplasm,nucleus,cytosol,chromosome,cytoskeleton	development,cell organization and biogenesis,metabolic process,cell death,response to stimulus	catalytic activity,structural molecule activity,metal ion binding,protein binding,motor activity	Cytoplasm. Cytoplasm > cytoskeleton.	Dynactin 150 kDa subunit family	CAP-Gly domain (1)
Q14204	DYHC1_HUMAN	DYHC_HUMAN	Q14204	DYNC1H1	Cytoplasmic dynein 1 heavy chain 1	Homo sapiens	X	X	3		n.a	cyto	cyto	cyto	Golgi,cytoplasm,cytosol,cytoskeleton	cell organization and biogenesis,metabolic process,transport	catalytic activity,nucleotide binding,protein binding,motor activity	Cytoplasm > cytoskeleton.	Dynein heavy chain family
Q14240-2	IF4A2_HUMAN	IF4A2_HUMAN	Q14240-2	EIF4A2	Isoform 2 of Eukaryotic initiation factor 4A-II	Homo sapiens	X	X	0		_	nucl	cyto	-	cytoplasm,cytosol	regulation of biological process,metabolic process	catalytic activity,nucleotide binding,DNA binding,protein binding,RNA binding		DEAD box helicase family, eIF4A subfamily	Helicase ATP-binding domain (1); Helicase C-terminal domain (1)
Q14247	SRC8_HUMAN	SRC8_HUMAN	Q14247	CTTN	Src substrate cortactin	Homo sapiens	X	X	0		_	cyto	plas	cyto,plas,plas	cytoplasm,cytoskeleton	cell organization and biogenesis,transport	protein binding	Cytoplasm > cytoskeleton. Cell projection > lamellipodium. Cell projection > ruffle.		Cortactin repeats (7); SH3 domain (1)
Q14315-2	FLNC_HUMAN	FLNC_HUMAN	Q14315-2	FLNC	Isoform 2 of Filamin-C	Homo sapiens	X	X	1		_	cyto	cyto	cyto,plas,cyto,cyto	membrane,cytoplasm,cytosol,cytoskeleton	cell organization and biogenesis	protein binding	Cytoplasm. Membrane; Peripheral membrane protein. Cytoplasm > cytoskeleton. Cytoplasm > myofibril > sarcomere > Z-disk.	Filamin family	Actin-binding domain (1); CH (calponin-homology) domains (2); Filamin repeats (24)
Q14596-2		NBR1_HUMAN	Q14596-2	NBR1	Isoform 2 of Next to BRCA1 gene 1 protein	Homo sapiens		X	2		_	nucl	-	cyto,cyve,lyso,cyto	endosome,cytoplasm,cytosol,vacuole	cell organization and biogenesis,metabolic process,response to stimulus,cell communication	metal ion binding,protein binding	Cytoplasm. Cytoplasmic vesicle > autophagosome. Lysosome. Cytoplasm > myofibril > sarcomere > M-band.		OPR domain (1); UBA domain (1); ZZ-type zinc finger (1)
Q14669		TRIPC_HUMAN	Q14669	TRIP12	Probable E3 ubiquitin-protein ligase TRIP12	Homo sapiens		X	3		_	nucl	cyto	-	proteasome,membrane,endosome,cytoplasm,cytosol,extracellular	regulation of biological process,cellular homeostasis,metabolic process,transport	catalytic activity,signal transducer activity,metal ion binding,protein binding		UPL family, K-HECT subfamily	HECT (E6AP-type E3 ubiquitin-protein ligase) domain (1); WWE domain (1)	Protein modification; protein ubiquitination.
20306289		K0179_HUMAN	Q14684-1	RRP1B	Ribosomal RNA processing 1 homolog B (S. cerevisiae)	Homo sapiens		X	0		_	nucl	nucl	nucl	cytoplasm,nucleus,cytosol,organelle lumen	cell organization and biogenesis,metabolic process	catalytic activity,metal ion binding,antioxidant activity,protein binding	Nucleus > nucleolus.	RRP1 family
Q14684-2	RRP1B_HUMAN		Q14684-2	RRP1B	Isoform 2 of Ribosomal RNA processing protein 1 homolog B	Homo sapiens	X		0		_	nucl	nucl	nucl	cytoplasm,cytosol,nucleus,organelle lumen	metabolic process	protein binding	Nucleus > nucleolus.	RRP1 family
Q14690		RRP5_HUMAN	Q14690	PDCD11	Protein RRP5 homolog	Homo sapiens		X	1		_	cyto_nucl	nucl	nucl	ribosome,cytoplasm,cytosol,nucleus,organelle lumen	cell differentiation,regulation of biological process,cell organization and biogenesis,metabolic process,cell death,cell communication	catalytic activity,DNA binding,transcription regulator activity,structural molecule activity,metal ion binding,protein binding,RNA binding	Nucleus > nucleolus.		HAT repeats (4); S1 motif domains (12)
Q14697-3	GANAB_HUMAN	GANAB_HUMAN	Q14697-3	GANAB	Isoform 3 of Neutral alpha-glucosidase AB	Homo sapiens	X	X	0	S	M	E.R.	cyto	E.R.,golg,cyve	Golgi,cytoplasm,endoplasmic reticulum,organelle lumen	metabolic process	catalytic activity,protein binding	Endoplasmic reticulum. Golgi apparatus. Melanosome.	Glycosyl hydrolase 31 family		Glycan metabolism; N-glycan metabolism.
Q14699	RFTN1_HUMAN		Q14699	RFTN1	Raftlin	Homo sapiens	X		1		_	cyto_nucl	plas	plas	membrane,cytoplasm	cell differentiation,regulation of biological process,development,metabolic process,response to stimulus,transport	DNA binding,nucleotide binding,transcription regulator activity,RNA binding,transporter activity	Cell membrane; Lipid-anchor.	Raftlin family
Q14764	MVP_HUMAN	MVP_HUMAN	Q14764	MVP	Major vault protein	Homo sapiens	X	X	0		_	cyto	nucl	cyto,nucl	membrane,cytoplasm,nucleus	cell organization and biogenesis,metabolic process,response to stimulus,transport	catalytic activity,DNA binding,nucleotide binding,metal ion binding,protein binding	Cytoplasm. Nucleus > nuclear pore complex.		MVP (vault) repeats (9)
Q14839-2		CHD4_HUMAN	Q14839-2	CHD4	Isoform 2 of Chromodomain-helicase-DNA-binding protein 4	Homo sapiens		X	2		_	nucl	nucl	nucl	nucleus,organelle lumen,chromosome	regulation of biological process,cell organization and biogenesis,metabolic process,cell communication	catalytic activity,nucleotide binding,DNA binding,metal ion binding,protein binding	Nucleus.	SNF2/RAD54 helicase family	Chromo domains (2); Helicase ATP-binding domain (1); Helicase C-terminal domain (1); PHD-type zinc fingers (2)
Q14847-2	LASP1_HUMAN	LASP1_HUMAN	Q14847-2	LASP1	Isoform 2 of LIM and SH3 domain protein 1	Homo sapiens	X	X	1		_	nucl	cyto	cyto,cyto	membrane,cytoplasm,cytoskeleton	cell organization and biogenesis,transport	signal transducer activity,metal ion binding,protein binding,transporter activity	Cytoplasm > cell cortex. Cytoplasm > cytoskeleton.		LIM zinc-binding domain (1); Nebulin repeats (2); SH3 domain (1)
Q14978-3		NOLC1_HUMAN	Q14978-3	NOLC1	Isoform 3 of Nucleolar and coiled-body phosphoprotein 1	Homo sapiens		X	0		_	nucl	nucl	nucl,cyto	cytoplasm,nucleus,organelle lumen	regulation of biological process,cell organization and biogenesis,cell proliferation,metabolic process,response to stimulus,transport	nucleotide binding,protein binding,RNA binding	Nucleus > nucleolus. Cytoplasm.		LisH domain (1)
Q14CN4-2	K2C72_HUMAN		Q14CN4-2	KRT72	Isoform 2 of Keratin, type II cytoskeletal 72	Homo sapiens	X		0		M	mito	-	-	membrane,cytoskeleton	metabolic process,transport	catalytic activity,structural molecule activity,transporter activity,motor activity		Intermediate filament family
Q15019-2		SEPT2_HUMAN	Q15019-2	2011-09-02	Isoform 2 of Septin-2	Homo sapiens		X	0		_	cyto	cyto	cyto,cyto,cyto,nucl,cyto,midb	membrane,cytoplasm,nucleus,organelle lumen,cell surface,chromosome,cytoskeleton	regulation of biological process,cell differentiation,cell division,development,cell organization and biogenesis,transport	nucleotide binding,structural molecule activity,protein binding,enzyme regulator activity	Cytoplasm. Cytoplasm > cytoskeleton. Cytoplasm > cytoskeleton > spindle. Chromosome > centromere > kinetochore. Cleavage furrow. Midbody.	Septin family
Q15029		U5S1_HUMAN	Q15029	EFTUD2	116 kDa U5 small nuclear ribonucleoprotein component	Homo sapiens		X	1		_	nucl	nucl	nucl	spliceosomal complex,cytoplasm,nucleus,organelle lumen	metabolic process,response to stimulus	catalytic activity,nucleotide binding,protein binding,RNA binding	Nucleus.	GTP-binding elongation factor family, EF-G/EF-2 subfamily
Q15061		WDR43_HUMAN	Q15061	WDR43	WD repeat-containing protein 43	Homo sapiens		X	0		_	cyto	nucl	nucl	nucleus,organelle lumen	metabolic process	protein binding	Nucleus > nucleolus.	UTP5 family	WD repeats (6)
Q15075	EEA1_HUMAN		Q15075	EEA1	Early endosome antigen 1	Homo sapiens	X		0		M	nucl	cyto	cyto,endo	membrane,endosome,cytoplasm,cytosol,cytoskeleton	regulation of biological process,reproduction,cell organization and biogenesis,metabolic process,transport	catalytic activity,nucleotide binding,metal ion binding,protein binding,RNA binding,motor activity	Cytoplasm. Early endosome membrane; Peripheral membrane protein.		C2H2-type zinc finger (1); FYVE-type zinc finger (1)
Q15084-2	PDIA6_HUMAN	PDIA6_HUMAN	Q15084-2	PDIA6	Isoform 2 of Protein disulfide-isomerase A6	Homo sapiens	X	X	1		S	extr	cyto	E.R.,plas,cyve	membrane,cytoplasm,endoplasmic reticulum,organelle lumen	regulation of biological process,cellular homeostasis,metabolic process	catalytic activity,protein binding	Endoplasmic reticulum lumen. Cell membrane. Melanosome.	Protein disulfide isomerase family	Thioredoxin domains (2)
Q15121	PEA15_HUMAN		Q15121	PEA15	Astrocytic phosphoprotein PEA-15	Homo sapiens	X		0		_	cyto	cyto	cyto	membrane,cytoplasm,cytoskeleton	regulation of biological process,cell differentiation,metabolic process,cell death,response to stimulus,transport	catalytic activity,protein binding,transporter activity	Cytoplasm.		DED (death effector) domain (1)
Q15149-9	PLEC_HUMAN	PLEC1_HUMAN	Q15149-9	PLEC	Isoform 9 of Plectin	Homo sapiens	X	X	1		n.a	cyto_nucl	cyto	cyto	membrane,cytoplasm,cytosol,cytoskeleton	cell differentiation,development,cell organization and biogenesis,cell death	structural molecule activity,protein binding	Cytoplasm > cytoskeleton.	Plakin or cytolinker family	Actin-binding domain (1); CH (calponin-homology) domains (2); Plectin repeats (33); Spectrin repeats (4)
Q15185	TEBP_HUMAN		Q15185	PTGES3	Prostaglandin E synthase 3	Homo sapiens	X		0		_	nucl	cyto	cyto	cytoplasm,nucleus,cytosol,chromosome	regulation of biological process,development,cell organization and biogenesis,cellular homeostasis,cell proliferation,metabolic process,cell communication	catalytic activity,nucleotide binding,antioxidant activity,protein binding	Cytoplasm.	P23/wos2 family	CS domain (1)	Lipid metabolism; prostaglandin biosynthesis.
Q15233	NONO_HUMAN	NONO_HUMAN	Q15233	NONO	Non-POU domain-containing octamer-binding protein	Homo sapiens	X	X	0		_	nucl	nucl	nucl	cytoplasm,nucleus,cytosol,organelle lumen	regulation of biological process,development,metabolic process,response to stimulus	catalytic activity,DNA binding,nucleotide binding,protein binding,RNA binding,transporter activity	Nucleus.		RRM (RNA recognition motif) domains (2)
Q15287-3		RNPS1_HUMAN	Q15287-3	RNPS1	Isoform 3 of RNA-binding protein with serine-rich domain 1	Homo sapiens		X	0		_	nucl	nucl	nucl,nucl,cyto	cytoplasm,nucleus,cytosol,organelle lumen	cell organization and biogenesis,metabolic process,transport	nucleotide binding,protein binding,RNA binding	Nucleus. Nucleus speckle. Cytoplasm.	Splicing factor SR family	RRM (RNA recognition motif) domain (1)
Q15293	RCN1_HUMAN	RCN1_HUMAN	Q15293	RCN1	Reticulocalbin-1	Homo sapiens	X	X	0	S	M	extr	cyto	E.R.	cytoplasm,endoplasmic reticulum,extracellular,organelle lumen		metal ion binding	Endoplasmic reticulum lumen.	CREC family	EF-hand domains (6)
Q15365	PCBP1_HUMAN	PCBP1_HUMAN	Q15365	PCBP1	Poly(rC)-binding protein 1	Homo sapiens	X	X	1		_	cysk	nucl	nucl,cyto	cytoplasm,nucleus,organelle lumen	regulation of biological process,metabolic process	translation regulator activity,DNA binding,protein binding,RNA binding	Nucleus. Cytoplasm.		KH domains (3)
Q15366		PCBP2_HUMAN	Q15366	PCBP2	Poly(rC)-binding protein 2	Homo sapiens		X	1		_	cysk	nucl	nucl,cyto	cytoplasm,nucleus,cytosol,organelle lumen	defense response,regulation of biological process,metabolic process,response to stimulus	catalytic activity,DNA binding,protein binding,RNA binding	Nucleus. Cytoplasm.		KH domains (3)
Q15393-3		SF3B3_HUMAN	Q15393-3	SF3B3	Isoform 3 of Splicing factor 3B subunit 3	Homo sapiens		X	0		M	plas	nucl	nucl	spliceosomal complex,nucleus,organelle lumen	cell organization and biogenesis,metabolic process	protein binding	Nucleus.	RSE1 family
Q15404		RSU1_HUMAN	Q15404	RSU1	Ras suppressor protein 1	Homo sapiens		X	0		_	cyto	cyto	-	cytoplasm,cytosol	regulation of biological process,cell organization and biogenesis,cell communication	catalytic activity,protein binding			LRR (leucine-rich) repeats (7)
Q15417	CNN3_HUMAN		Q15417	CNN3	Calponin-3	Homo sapiens	X		0		_	cyto	cyto	-	cytoskeleton	development,cell organization and biogenesis	protein binding		Calponin family	Calponin-like repeats (3); CH (calponin-homology) domain (1)
Q15424		SAFB1_HUMAN	Q15424	SAFB	Scaffold attachment factor B1	Homo sapiens		X	0		_	nucl	nucl	nucl	membrane,cytoplasm,nucleus,organelle lumen,chromosome	regulation of biological process,cell division,cell organization and biogenesis,metabolic process,response to stimulus	catalytic activity,transcription regulator activity,nucleotide binding,DNA binding,metal ion binding,protein binding,enzyme regulator activity,RNA binding	Nucleus.		RRM (RNA recognition motif) domain (1); SAP domain (1)
Q15428		SF3A2_HUMAN	Q15428	SF3A2	Splicing factor 3A subunit 2	Homo sapiens		X	0		_	cyto	nucl	nucl	spliceosomal complex,nucleus,organelle lumen	cell differentiation,cell organization and biogenesis,metabolic process	structural molecule activity,metal ion binding,protein binding	Nucleus.	SF3A2 family	Matrin-type zinc finger (1)
Q15436	SC23A_HUMAN		Q15436	SEC23A	Protein transport protein Sec23A	Homo sapiens	X		3		_	cyto	cyto	E.R.,golg	membrane,Golgi,cytoplasm,endoplasmic reticulum,nucleus,cytosol,organelle lumen	regulation of biological process,cell organization and biogenesis,metabolic process,response to stimulus,transport	catalytic activity,DNA binding,nucleotide binding,transcription regulator activity,structural molecule activity,metal ion binding,protein binding,transporter activity	Smooth endoplasmic reticulum membrane; Peripheral membrane protein. Golgi apparatus membrane; Peripheral membrane protein.	SEC23/SEC24 family, SEC23 subfamily
Q15459	SF3A1_HUMAN	SF3A1_HUMAN	Q15459	SF3A1	Splicing factor 3A subunit 1	Homo sapiens	X	X	0		_	cyto	nucl	nucl	membrane,spliceosomal complex,cytoplasm,nucleus,extracellular,organelle lumen,cytoskeleton	cell differentiation,regulation of biological process,cell organization and biogenesis,metabolic process,response to stimulus,transport	catalytic activity,nucleotide binding,structural molecule activity,metal ion binding,protein binding,enzyme regulator activity,RNA binding	Nucleus.		SURP motif repeats (2); Ubiquitin-like domain (1)
Q15637-6		SF01_HUMAN	Q15637-6	SF1	Isoform 6 of Splicing factor 1	Homo sapiens		X	0		_	nucl	nucl	nucl	spliceosomal complex,membrane,ribosome,cytoplasm,nucleus,organelle lumen	regulation of biological process,cell organization and biogenesis,cell proliferation,metabolic process,response to stimulus,cell communication	transcription regulator activity,metal ion binding,signal transducer activity,protein binding,RNA binding,receptor activity	Nucleus.	BBP/SF1 family	CCHC-type zinc finger (1); KH domain (1)
Q15651-2		HMGN3_HUMAN	Q15651-2	HMGN3	Isoform 2 of High mobility group nucleosome-binding domain-containing protein 3	Homo sapiens		X	0		_	nucl	nucl	nucl	cytoplasm,nucleus,organelle lumen,chromosome	cell organization and biogenesis	DNA binding,signal transducer activity,protein binding	Nucleus.	HMGN family
Q15654	TRIP6_HUMAN		Q15654	TRIP6	Thyroid receptor-interacting protein 6	Homo sapiens	X		0		_	nucl	extr	cyto,plas,nucl,cyto	membrane,cytoplasm,nucleus,cytoskeleton	defense response,regulation of biological process,cellular component movement,cell organization and biogenesis,metabolic process,response to stimulus,transport,cell communication	DNA binding,signal transducer activity,metal ion binding,protein binding,receptor activity	Cytoplasm > cytoskeleton. Cell junction > focal adhesion. Nucleus. Cytoplasm.	Zyxin/ajuba family	LIM zinc-binding domains (3)
Q15691		MARE1_HUMAN	Q15691	MAPRE1	Microtubule-associated protein RP/EB family member 1	Homo sapiens		X	0		_	cyto	cyto	cyto,cyto	membrane,Golgi,cytoplasm,cytosol,cytoskeleton	regulation of biological process,cell division,cell organization and biogenesis,cell proliferation,metabolic process	protein binding	Cytoplasm > cytoskeleton. Cytoplasm > cytoskeleton > centrosome.	MAPRE family	CH (calponin-homology) domain (1); EB1 C-terminal domain (1)
Q15717		ELAV1_HUMAN	Q15717	ELAVL1	ELAV-like protein 1	Homo sapiens		X	0		_	cyto	cyto	cyto	cytoplasm,nucleus,extracellular,organelle lumen	regulation of biological process,development,metabolic process,response to stimulus	catalytic activity,nucleotide binding,metal ion binding,protein binding,RNA binding	Cytoplasm.	RRM elav family	RRM (RNA recognition motif) domains (3)
Q15906		VPS72_HUMAN	Q15906	VPS72	Vacuolar protein sorting-associated protein 72 homolog	Homo sapiens		X	0		_	nucl	nucl	nucl	membrane,nucleus	regulation of biological process,cell organization and biogenesis,metabolic process,transport	catalytic activity,DNA binding,transcription regulator activity,structural molecule activity,protein binding	Nucleus.	VPS72/YL1 family
Q15907	RB11B_HUMAN		Q15907	RAB11B	Ras-related protein Rab-11B	Homo sapiens	X		1		_	cysk	cyto	plas	membrane,cytoplasm,mitochondrion	regulation of biological process,cell organization and biogenesis,metabolic process,transport,cell communication	catalytic activity,DNA binding,nucleotide binding,protein binding,motor activity	Cell membrane; Lipid-anchor; Cytoplasmic side.	Small GTPase superfamily, Rab family
Q15942	ZYX_HUMAN	ZYX_HUMAN	Q15942	ZYX	Zyxin	Homo sapiens	X	X	0		M	nucl	plas	cyto,cyto,nucl,plas	membrane,cytoplasm,nucleus,cytoskeleton	regulation of biological process,cell communication	metal ion binding,protein binding	Cytoplasm. Cytoplasm > cytoskeleton. Nucleus. Cell junction > focal adhesion.	Zyxin/ajuba family	LIM zinc-binding domains (3)
Q16082	HSPB2_HUMAN		Q16082	HSPB2-C11ORF52	Heat shock protein beta-2	Homo sapiens	X		0		_	cyto_nucl	cyto	cyto,nucl	cytoplasm,nucleus,cytosol	development,metabolic process,response to stimulus	protein binding,enzyme regulator activity	Cytoplasm. Nucleus.	Small heat shock protein (HSP20) family
Q16181-2	SEPT7_HUMAN	SEPT7_HUMAN	Q16181-2	2011-09-07	Isoform 2 of Septin-7	Homo sapiens	X	X	0		_	cyto	cyto	cyto,nucl,cyto,cyto,midb	membrane,cytoplasm,nucleus,chromosome,cytoskeleton	regulation of biological process,cell division,development,cell organization and biogenesis,transport	nucleotide binding,structural molecule activity,protein binding,transporter activity	Cytoplasm. Chromosome > centromere > kinetochore. Cytoplasm > cytoskeleton > spindle. Cleavage furrow. Midbody.	Septin family
Q16270		IBP7_HUMAN	Q16270	IGFBP7	Insulin-like growth factor-binding protein 7	Homo sapiens		X	0	S	S	extr	extr	extr	cytoplasm,extracellular	regulation of biological process,reproduction,development,cell organization and biogenesis,cell growth,metabolic process,cell proliferation,response to stimulus	catalytic activity,metal ion binding,protein binding,enzyme regulator activity	Secreted.		Ig-like C2-type (immunoglobulin-like) domain (1); IGFBP N-terminal domain (1); Kazal-like domain (1)
Q16527		CSRP2_HUMAN	Q16527	CSRP2	Cysteine and glycine-rich protein 2	Homo sapiens		X	0		_	nucl	nucl	nucl	membrane,cytoplasm,nucleus	regulation of biological process,cell differentiation,development,cell organization and biogenesis,cell growth,cell proliferation,metabolic process,response to stimulus	catalytic activity,nucleotide binding,DNA binding,metal ion binding,protein binding,RNA binding	Nucleus.		LIM zinc-binding domains (2)
Q16531	DDB1_HUMAN		Q16531	LOC100290337	DNA damage-binding protein 1	Homo sapiens	X		2		_	cyto	nucl	cyto,nucl	cytoplasm,cytosol,nucleus,organelle lumen	defense response,regulation of biological process,reproduction,cell proliferation,metabolic process,cell death,response to stimulus	catalytic activity,DNA binding,metal ion binding,protein binding,RNA binding	Cytoplasm. Nucleus.	DDB1 family		Protein modification; protein ubiquitination.
Q16576		RBBP7_HUMAN	Q16576	RBBP7	Histone-binding protein RBBP7	Homo sapiens		X	0		_	cyto_nucl	nucl	nucl	membrane,Golgi,cytoplasm,nucleus,organelle lumen,chromosome	regulation of biological process,development,cell organization and biogenesis,cell growth,cell proliferation,metabolic process,response to stimulus,transport	catalytic activity,transcription regulator activity,nucleotide binding,DNA binding,metal ion binding,protein binding,enzyme regulator activity	Nucleus.	WD repeat RBAP46/RBAP48/MSI1 family	WD repeats (7)
Q16629-3	SRSF7_HUMAN	SFRS7_HUMAN	Q16629-3	SRSF7	Isoform 3 of Serine/arginine-rich splicing factor 7	Homo sapiens	X	X	0		_	nucl	nucl	nucl	nucleus,organelle lumen	cell organization and biogenesis,metabolic process,transport	nucleotide binding,metal ion binding,protein binding,RNA binding	Nucleus.	Splicing factor SR family	CCHC-type zinc finger (1); RRM (RNA recognition motif) domain (1)
Q16643-2	DREB_HUMAN	DREB_HUMAN	Q16643-2	DBN1	Isoform 2 of Drebrin	Homo sapiens	X	X	0		_	nucl	cyto	cyto	membrane,cytoplasm,cytoskeleton	cell differentiation,regulation of biological process,development,cell organization and biogenesis,cell communication	protein binding	Cytoplasm.		ADF-H domain (1)
Q16670-2	ZN187_HUMAN		Q16670-2	ZNF187	Isoform 2 of Zinc finger protein 187	Homo sapiens	X		0		_	nucl	nucl	nucl	nucleus	regulation of biological process,metabolic process	transcription regulator activity,DNA binding,metal ion binding	Nucleus.		C2H2-type zinc fingers (8); SCAN box domain (1)
Q16698	DECR_HUMAN		Q16698	DECR1	2,4-dienoyl-CoA reductase, mitochondrial	Homo sapiens	X		0		M	mito	cyto	mito	membrane,cytoplasm,nucleus,mitochondrion,organelle lumen	cell organization and biogenesis,metabolic process	catalytic activity,nucleotide binding	Mitochondrion.	Short-chain dehydrogenases/reductases (SDR) family, 2,4-dienoyl-CoA reductase subfamily
Q1KMD3	HNRL2_HUMAN		Q1KMD3	HNRNPUL2	Heterogeneous nuclear ribonucleoprotein U-like protein 2	Homo sapiens	X		0		_	nucl	nucl	nucl	nucleus	regulation of biological process,metabolic process	catalytic activity,DNA binding,nucleotide binding,metal ion binding,protein binding	Nucleus.		B30.2/SPRY domain (1); SAP domain (1)
Q2TAY7		SMU1_HUMAN	Q2TAY7	SMU1	WD40 repeat-containing protein SMU1	Homo sapiens		X	0		_	cyto	nucl	cyto,nucl	cytoplasm,nucleus,cytoskeleton,chromosome	regulation of biological process,cell differentiation,cell division,development,cell organization and biogenesis,metabolic process	catalytic activity,DNA binding,metal ion binding,protein binding	Cytoplasm. Nucleus.	WD repeat SMU1 family	CTLH domain (1); LisH domain (1); WD repeats (6)
Q2VIR3-2	IF2GL_HUMAN		Q2VIR3-2		Isoform 2 of Eukaryotic translation initiation factor 2 subunit 3-like protein	Homo sapiens	X		2		_	cyto	cyto	-	membrane		catalytic activity,nucleotide binding		GTP-binding elongation factor family, EIF2G subfamily
Q32MZ4-3		LRRF1_HUMAN	Q32MZ4-3	LRRFIP1	Isoform 3 of Leucine-rich repeat flightless-interacting protein 1	Homo sapiens		X	0		_	nucl	nucl	nucl,cyto	cytoplasm,nucleus,cytoskeleton	regulation of biological process,metabolic process	transcription regulator activity,DNA binding,protein binding,RNA binding	Nucleus. Cytoplasm.	LRRFIP family
Q4KMP7-2	TB10B_HUMAN		Q4KMP7-2	TBC1D10B	Isoform 2 of TBC1 domain family member 10B	Homo sapiens	X		0		M	nucl	-	-		regulation of biological process,metabolic process	catalytic activity,enzyme regulator activity			Rab-GAP TBC domain (1)
Q53GG5-3	PDLI3_HUMAN	PDLI3_HUMAN	Q53GG5-3	PDLIM3	Isoform 3 of PDZ and LIM domain protein 3	Homo sapiens	X	X	0		_	cyto_nucl	cyto	cyto	cytoplasm,nucleus,organelle lumen,cytoskeleton	development,cell organization and biogenesis	structural molecule activity,metal ion binding,protein binding	Cytoplasm > myofibril > sarcomere > Z-disk.		LIM zinc-binding domain (1); PDZ (DHR) domain (1)
Q562R1	ACTBL_HUMAN		Q562R1	ACTBL2	Beta-actin-like protein 2	Homo sapiens	X		0		_	cysk	-	cyto	cytoplasm,cytoskeleton		nucleotide binding,structural molecule activity,protein binding	Cytoplasm > cytoskeleton.	Actin family
Q5BKZ1-2		ZN326_HUMAN	Q5BKZ1-2	ZNF326	Isoform 2 of Zinc finger protein 326	Homo sapiens		X	0		_	nucl	nucl	nucl	nucleus,organelle lumen	regulation of biological process,metabolic process	transcription regulator activity,DNA binding,metal ion binding	Nucleus matrix.	AKAP95 family
Q5JNZ5	RS26L_HUMAN		Q5JNZ5	RPS26P11	Putative 40S ribosomal protein S26-like 1	Homo sapiens	X		0		_	cyto	-	-	ribosome,cytoplasm,cytosol,nucleus,mitochondrion,organelle lumen	regulation of biological process,cell organization and biogenesis,metabolic process,transport	catalytic activity,nucleotide binding,structural molecule activity,protein binding,RNA binding		Ribosomal protein S26e family
Q5JPE7-2	NOMO2_HUMAN		Q5JPE7-2	NOMO2	Isoform 2 of Nodal modulator 2	Homo sapiens	X		2	S	S	extr	cyto	E.R.	membrane,cytoplasm,endoplasmic reticulum	metabolic process	catalytic activity,metal ion binding,protein binding	Endoplasmic reticulum membrane; Single-pass membrane protein.
Q5JRM2	CX066_HUMAN		Q5JRM2	CXorf66	Uncharacterized protein CXorf66	Homo sapiens	X		1		S	extr	-	plas	membrane			Membrane; Single-pass type I membrane protein.
Q5JTV8-2		TOIP1_HUMAN	Q5JTV8-2	TOR1AIP1	Isoform 2 of Torsin-1A-interacting protein 1	Homo sapiens		X	0		_	nucl	nucl	nucl	membrane,nucleus			Nucleus inner membrane; Single-pass membrane protein.	TOR1AIP family
Q5JWF2-3	GNAS1_HUMAN		Q5JWF2-3	GNAS	Isoform XLas-3 of Guanine nucleotide-binding protein G(s) subunit alpha isoforms XLas	Homo sapiens	X		0		_	cyto	plas	plas	membrane,Golgi,cytoplasm,extracellular	coagulation,cell differentiation,regulation of biological process,reproduction,development,metabolic process,response to stimulus,transport,cell communication	catalytic activity,nucleotide binding,signal transducer activity,protein binding,enzyme regulator activity	Cell membrane; Peripheral membrane protein.	G-alpha family, G(s) subfamily
Q5QNW6	H2B2F_HUMAN		Q5QNW6	HIST2H2BF	Histone H2B type 2-F	Homo sapiens	X		0		_	nucl	-	nucl,nucl	nucleus,chromosome	defense response,cell differentiation,cell organization and biogenesis,metabolic process,response to stimulus	DNA binding,protein binding	Nucleus. Chromosome.	Histone H2B family
Q5T9A4-3	ATD3B_HUMAN		Q5T9A4-3	ATAD3B	Isoform 3 of ATPase family AAA domain-containing protein 3B	Homo sapiens	X		0	S	_	cyto	nucl	-	membrane		catalytic activity,nucleotide binding		AAA ATPase family
Q5VTE0	EF1A3_HUMAN		Q5VTE0	EEF1A1P5	Putative elongation factor 1-alpha-like 3	Homo sapiens	X		1		_	cyto	-	cyto	membrane,ribosome,Golgi,endosome,cytoplasm,nucleus,cytosol,extracellular,mitochondrion	regulation of biological process,metabolic process,response to stimulus	translation regulator activity,catalytic activity,nucleotide binding,structural molecule activity,protein binding,RNA binding	Cytoplasm.	GTP-binding elongation factor family, EF-Tu/EF-1A subfamily
Q68CZ2-4	TENS3_HUMAN		Q68CZ2-4	TNS3	Isoform 4 of Tensin-3	Homo sapiens	X		1		_	nucl	-	plas	membrane,cytoplasm,nucleus,organelle lumen	regulation of biological process,cellular component movement,development,cell proliferation,metabolic process	catalytic activity,protein binding	Cell junction > focal adhesion.		C2 tensin-type domain (1); Phosphatase tensin-type domain (1); SH2 domain (1)
Q6DKI1		RL7L_HUMAN	Q6DKI1	RPL7L1	60S ribosomal protein L7-like 1	Homo sapiens		X	0		_	cyto	cyto	-	ribosome,cytoplasm,nucleus,cytosol	regulation of biological process,cell organization and biogenesis,metabolic process,response to stimulus,transport	catalytic activity,transcription regulator activity,nucleotide binding,DNA binding,structural molecule activity,metal ion binding,protein binding,RNA binding		Ribosomal protein L30P family
Q6IBS0		TWF2_HUMAN	Q6IBS0	TWF2	Twinfilin-2	Homo sapiens		X	0		_	cyto	cyto	cyto,cyto	membrane,cytoplasm,cytoskeleton	regulation of biological process,metabolic process,response to stimulus	catalytic activity,nucleotide binding,DNA binding,protein binding	Cytoplasm > cytoskeleton. Cytoplasm > perinuclear region.	Actin-binding proteins ADF family, Twinfilin subfamily	ADF-H domains (2)
Q6NYC8-1		K1949_HUMAN	Q6NYC8-1	KIAA1949	Phostensin	Homo sapiens		X	0		_	nucl	-	cyto	cytoplasm,cytoskeleton	metabolic process,transport	catalytic activity,metal ion binding,protein binding	Cytoplasm > cytoskeleton.
Q6NZI2-3	PTRF_HUMAN	PTRF_HUMAN	Q6NZI2-3	PTRF	Isoform 3 of Polymerase I and transcript release factor	Homo sapiens	X	X	0		_	nucl	nucl	plas,plas,E.R.,E.R.,cyto,mito,nucl	membrane,cytoplasm,nucleus,endoplasmic reticulum,cytosol,mitochondrion,organelle lumen	regulation of biological process,cell organization and biogenesis,metabolic process	transcription regulator activity,protein binding,RNA binding	Membrane > caveola. Cell membrane. Microsome. Endoplasmic reticulum. Cytoplasm > cytosol. Mitochondrion. Nucleus.	PTRF/SDPR family
Q6P2Q9		PRP8_HUMAN	Q6P2Q9	PRPF8	Pre-mRNA-processing-splicing factor 8	Homo sapiens		X	4		_	cyto	nucl	nucl	spliceosomal complex,nucleus,organelle lumen	metabolic process,response to stimulus	structural molecule activity,protein binding,RNA binding	Nucleus speckle.		MPN (JAB/Mov34) domain (1)
Q6PIU2-3	NCEH1_HUMAN		Q6PIU2-3	NCEH1	Isoform 3 of Neutral cholesterol ester hydrolase 1	Homo sapiens	X		0		S	extr	plas	plas,E.R.	membrane,cytoplasm,endoplasmic reticulum	metabolic process,response to stimulus	catalytic activity	Membrane; Single-pass type II membrane protein. Microsome.	'GDXG' lipolytic enzyme family
Q6WCQ1-3	MPRIP_HUMAN		Q6WCQ1-3	MPRIP	Isoform 3 of Myosin phosphatase Rho-interacting protein	Homo sapiens	X		0		_	nucl	cyto	cyto	cytoplasm,cytoskeleton		protein binding	Cytoplasm > cytoskeleton.		PH domains (2)
Q6ZMU5-2	TRI72_HUMAN		Q6ZMU5-2	TRIM72	Isoform 2 of Tripartite motif-containing protein 72	Homo sapiens	X		0	S	S	nucl	-	plas,cyve	membrane,cytoplasm	development,cell organization and biogenesis,response to stimulus,transport	catalytic activity,metal ion binding,protein binding	Cell membrane > sarcolemma. Cytoplasmic vesicle membrane.	TRIM/RBCC family	B box-type zinc finger (1); B30.2/SPRY domain (1); RING-type zinc finger (1)
Q702N8-3	XIRP1_HUMAN		Q702N8-3	XIRP1	Isoform C of Xin actin-binding repeat-containing protein 1	Homo sapiens	X		0		_	nucl	plas	plas	membrane	cell differentiation,regulation of biological process,development,cell organization and biogenesis,cellular homeostasis,cell proliferation	protein binding	Cell junction.	Xin family	Xin repeats (17)
Q70E73-9		RAPH1_HUMAN	Q70E73-9	RAPH1	Isoform RMO1abc of Ras-associated and pleckstrin homology domains-containing protein 1	Homo sapiens		X	0		_	nucl	plas	plas,plas,plas,cyto	membrane,cytoplasm,nucleus,cytoskeleton	regulation of biological process,cell communication	protein binding	Cell membrane; Peripheral membrane protein; Cytoplasmic side. Cell projection > lamellipodium. Cell projection > filopodium. Cytoplasm > cytoskeleton.	MRL family	PH domain (1); Ras-associating domain (1)
Q71DI3	H32_HUMAN	H32_HUMAN	Q71DI3	HIST2H3D	Histone H3.2	Homo sapiens	X	X	0		_	nucl	-	nucl,nucl	nucleus,organelle lumen,chromosome	coagulation,cell differentiation,regulation of biological process,cell organization and biogenesis,metabolic process,response to stimulus	catalytic activity,nucleotide binding,DNA binding,protein binding,enzyme regulator activity	Nucleus. Chromosome.	Histone H3 family
Q71U36	TBA1A_HUMAN	TBA3_HUMAN	Q71U36	TUBA1A	Tubulin alpha-1A chain	Homo sapiens	X	X	0		_	cysk	cyto	cyto	membrane,Golgi,endosome,cytoplasm,cytosol,extracellular,mitochondrion,cytoskeleton	regulation of biological process,cell organization and biogenesis,metabolic process,response to stimulus,transport	catalytic activity,nucleotide binding,structural molecule activity,protein binding,transporter activity	Cytoplasm > cytoskeleton.	Tubulin family
Q71UI9		H2AV_HUMAN	Q71UI9	H2AFV	Histone H2A.V	Homo sapiens		X	1		_	nucl	nucl	nucl,nucl	nucleus,chromosome	cell differentiation,cell organization and biogenesis,metabolic process	catalytic activity,DNA binding,nucleotide binding	Nucleus. Chromosome.	Histone H2A family
Q71UM5	RS27L_HUMAN	RS27L_HUMAN	Q71UM5	RPS27L	40S ribosomal protein S27-like	Homo sapiens	X	X	0	S	_	extr	nucl	-	ribosome,cytoplasm,cytosol,nucleus,mitochondrion,organelle lumen	regulation of biological process,cell organization and biogenesis,metabolic process,cell death,response to stimulus,transport	translation regulator activity,catalytic activity,nucleotide binding,structural molecule activity,metal ion binding,protein binding,enzyme regulator activity,RNA binding		Ribosomal protein S27e family
Q7KZF4		SND1_HUMAN	Q7KZF4	SND1	Staphylococcal nuclease domain-containing protein 1	Homo sapiens		X	1		_	cyto	nucl	cyto,nucl,cyve	Golgi,cytoplasm,nucleus,mitochondrion	regulation of biological process,metabolic process	catalytic activity,transcription regulator activity,protein binding	Cytoplasm. Nucleus. Melanosome.		TNase-like domains (4); Tudor domain (1)
Q7Z2W4-1		ZCC2_HUMAN	Q7Z2W4-1	ZC3HAV1	Isoform 1 of Q7Z2W4	Homo sapiens		X	1		_	cyto	plas	cyto,nucl	cytoplasm,nucleus	metabolic process,response to stimulus	catalytic activity,metal ion binding,RNA binding	Cytoplasm. Nucleus.		C3H1-type zinc fingers (4); PARP catalytic domain (1); WWE domain (1)
Q7Z417		NUFP2_HUMAN	Q7Z417	NUFIP2	Nuclear fragile X mental retardation-interacting protein 2	Homo sapiens		X	0		_	nucl	-	nucl,cyto	Golgi,ribosome,cytoplasm,nucleus		catalytic activity,protein binding,RNA binding	Nucleus. Cytoplasm.
Q7Z478		DHX29_HUMAN	Q7Z478	DHX29	ATP-dependent RNA helicase DHX29	Homo sapiens		X	4		M	nucl	-	cyto	cytoplasm,mitochondrion	metabolic process,response to stimulus	catalytic activity,nucleotide binding,RNA binding	Cytoplasm.	DEAD box helicase family, DEAH subfamily	Helicase ATP-binding domain (1); Helicase C-terminal domain (1)
Q7Z794	K2C1B_HUMAN		Q7Z794	KRT77	Keratin, type II cytoskeletal 1b	Homo sapiens	X		0		M	nucl	-	-	cytoplasm,cytoskeleton	regulation of biological process,cell organization and biogenesis,cell communication	structural molecule activity,protein binding		Intermediate filament family
Q86TC9-3		MYPN_HUMAN	Q86TC9-3	MYPN	Isoform 3 of Myopalladin	Homo sapiens		X	0		_	nucl	cyto	cyto,nucl,cyto	cytoplasm,nucleus		catalytic activity,protein binding	Cytoplasm. Nucleus. Cytoplasm > myofibril > sarcomere.	Myotilin/palladin family	Ig-like (immunoglobulin-like) domains (5)
Q86UP2-2	KTN1_HUMAN		Q86UP2-2	KTN1	Isoform 2 of Kinectin	Homo sapiens	X		1		S	E.R.	cyto	E.R.	membrane,cytoplasm,endoplasmic reticulum	metabolic process	catalytic activity,signal transducer activity,protein binding,receptor activity	Endoplasmic reticulum membrane; Single-pass type II membrane protein.	Kinectin family
Q86V81		THOC4_HUMAN	Q86V81	THOC4	THO complex subunit 4	Homo sapiens		X	0		_	cyto	nucl	nucl,nucl,cyto	spliceosomal complex,cytoplasm,cytosol,nucleus,organelle lumen	defense response,regulation of biological process,reproduction,cell organization and biogenesis,cellular homeostasis,metabolic process,response to stimulus,transport	catalytic activity,nucleotide binding,DNA binding,protein binding,RNA binding	Nucleus. Nucleus speckle. Cytoplasm.	THOC4 family	RRM (RNA recognition motif) domain (1)
Q86VP6-3	CAND1_HUMAN		Q86VP6-3	CAND1	Isoform 3 of Cullin-associated NEDD8-dissociated protein 1	Homo sapiens	X		1		_	cyto	cyto	nucl	nucleus	cell differentiation,regulation of biological process,cell organization and biogenesis,metabolic process	transcription regulator activity,protein binding	Nucleus.	CAND family	HEAT repeats (27)
Q86W92-5		LIPB1_HUMAN	Q86W92-5	PPFIBP1	Isoform 5 of Liprin-beta-1	Homo sapiens		X	0		_	nucl	plas	-	membrane,cytoplasm		protein binding		Liprin family, Liprin-beta subfamily	SAM (sterile alpha motif) domains (3)
Q86WV6	TM173_HUMAN		Q86WV6	TMEM173	Transmembrane protein 173	Homo sapiens	X		4	S	S	plas	-	E.R.,mito,plas,cyto	membrane,cytoplasm,endoplasmic reticulum,mitochondrion	defense response,cell death,response to stimulus	protein binding	Endoplasmic reticulum membrane; Multi-pass membrane protein. Mitochondrion outer membrane; Multi-pass membrane protein. Cell membrane; Multi-pass membrane protein. Cytoplasm > perinuclear region.	TMEM173 family
Q8IUE6	H2A2B_HUMAN		Q8IUE6	HIST2H2AB	Histone H2A type 2-B	Homo sapiens	X		1		_	nucl	nucl	nucl,nucl	cytoplasm,nucleus,chromosome	cell differentiation,cell organization and biogenesis,metabolic process	catalytic activity,DNA binding,nucleotide binding	Nucleus. Chromosome.	Histone H2A family
Q8IV01	SYTC_HUMAN		Q8IV01	SYT12	Synaptotagmin-12	Homo sapiens	X		1	S	_	extr	plas	cyve	membrane,cytoplasm	metabolic process,response to stimulus,transport	catalytic activity,nucleotide binding,DNA binding,protein binding,transporter activity	Cytoplasmic vesicle > secretory vesicle > synaptic vesicle membrane; Single-pass membrane protein.	Synaptotagmin family	C2 domains (2)
Q8IVF2-3	AHNK2_HUMAN		Q8IVF2-3	AHNAK2	Isoform 3 of Protein AHNAK2	Homo sapiens	X		0		n.a	nucl	-	nucl	cytoplasm,nucleus	cell differentiation,development	protein binding	Nucleus.		PDZ (DHR) domain (1)
Q8IX12-2		CCAR1_HUMAN	Q8IX12-2	CCAR1	Isoform 2 of Cell division cycle and apoptosis regulator protein 1	Homo sapiens		X	0		_	mito	nucl	cyto	Golgi,cytoplasm,nucleus,organelle lumen	regulation of biological process,metabolic process,cell death	metal ion binding,protein binding	Cytoplasm > perinuclear region.		SAP domain (1)
Q8IY81		RRMJ3_HUMAN	Q8IY81	FTSJ3	Putative rRNA methyltransferase 3	Homo sapiens		X	1		_	nucl	nucl	nucl	membrane,nucleus,organelle lumen	cell division,cell organization and biogenesis,metabolic process	catalytic activity,metal ion binding,transporter activity	Nucleus > nucleolus.	Methyltransferase superfamily, RlmE family
Q8N163-2	K1967_HUMAN		Q8N163-2	KIAA1967	Isoform 2 of Protein KIAA1967	Homo sapiens	X		1		M	nucl	cyto	-	membrane,cytoplasm,nucleus,mitochondrion,organelle lumen	regulation of biological process,cell death	metal ion binding,protein binding,enzyme regulator activity
Q8N1G4		LRC47_HUMAN	Q8N1G4	LRRC47	Leucine-rich repeat-containing protein 47	Homo sapiens		X	0		_	nucl	-	-		metabolic process	catalytic activity,protein binding,RNA binding			LRR (leucine-rich) repeats (7)
Q8N488		RYBP_HUMAN	Q8N488	RYBP	RING1 and YY1-binding protein	Homo sapiens		X	0		_	nucl	nucl	nucl,cyto	cytoplasm,nucleus,organelle lumen	defense response,regulation of biological process,cell differentiation,reproduction,development,cell organization and biogenesis,metabolic process,cell proliferation,cell death,response to stimulus,transport,cell communication	catalytic activity,nucleotide binding,DNA binding,transcription regulator activity,signal transducer activity,metal ion binding,protein binding,RNA binding,receptor activity	Nucleus. Cytoplasm.		RanBP2-type zinc finger (1)
Q8N8S7-2		ENAH_HUMAN	Q8N8S7-2	ENAH	Isoform 2 of Protein enabled homolog	Homo sapiens		X	0		_	nucl	cyto	cyto,cyto,plas,plas,plas,plas	membrane,cytoplasm,nucleus,cytosol,cytoskeleton	regulation of biological process,cell differentiation,development,cellular component movement,cell organization and biogenesis,metabolic process,response to stimulus,transport,cell communication	DNA binding,structural molecule activity,signal transducer activity,protein binding,transporter activity,receptor activity	Cytoplasm. Cytoplasm > cytoskeleton. Cell projection > lamellipodium. Cell projection > filopodium. Cell junction > synapse. Cell junction > focal adhesion.	Ena/VASP family	WH1 domain (1)
Q8NBS9	TXND5_HUMAN	TXND5_HUMAN	Q8NBS9	TXNDC5	Thioredoxin domain-containing protein 5	Homo sapiens	X	X	1	S	S	extr	cyto	E.R.	membrane,cytoplasm,endoplasmic reticulum,extracellular,vacuole,organelle lumen	defense response,regulation of biological process,cell differentiation,cell organization and biogenesis,cellular homeostasis,metabolic process,cell death,response to stimulus,transport,cell communication	catalytic activity,nucleotide binding,protein binding,enzyme regulator activity	Endoplasmic reticulum lumen.	Protein disulfide isomerase family	Thioredoxin domains (3)
Q8NBX0	SCPDH_HUMAN		Q8NBX0	SCCPDH	Probable saccharopine dehydrogenase	Homo sapiens	X		2		_	E.R._mito	cyto	-	membrane,cytoplasm,mitochondrion	regulation of biological process,cellular homeostasis,metabolic process	catalytic activity,metal ion binding		Saccharopine dehydrogenase family		Amino-acid degradation; L-lysine degradation via saccharopine pathway; glutaryl-CoA from L-lysine: step 2/6.
Q8NC51-4	PAIRB_HUMAN	PAIRB_HUMAN	Q8NC51-4	SERBP1	Isoform 4 of Plasminogen activator inhibitor 1 RNA-binding protein	Homo sapiens	X	X	0		_	nucl	nucl	cyto,nucl,cyto	membrane,cytoplasm,nucleus,chromosome	regulation of biological process,cell organization and biogenesis,metabolic process,cell communication	DNA binding,signal transducer activity,protein binding,RNA binding,receptor activity	Cytoplasm. Nucleus. Cytoplasm > perinuclear region.
Q8NE71-2		ABCF1_HUMAN	Q8NE71-2	ABCF1	Isoform 2 of ATP-binding cassette sub-family F member 1	Homo sapiens		X	0		_	nucl	cyto	-	membrane,ribosome,cytoplasm,nucleus,organelle lumen	defense response,regulation of biological process,metabolic process,response to stimulus	translation regulator activity,catalytic activity,nucleotide binding,protein binding,RNA binding,transporter activity		ABC transporter superfamily, ABCF family, EF3 subfamily	ABC transporter domains (2)
Q8NFW8-2		NEUA_HUMAN	Q8NFW8-2	CMAS	Isoform 2 of N-acylneuraminate cytidylyltransferase	Homo sapiens		X	1		_	nucl	nucl	nucl	nucleus	metabolic process	catalytic activity,metal ion binding	Nucleus.	CMP-NeuNAc synthase family		Amino-sugar metabolism; N-acetylneuraminate metabolism.
21218140		MRIP_HUMAN	Q8NFW9	MYRIP	rab effector MYRIP	Homo sapiens		X	1		_	nucl	cyto	cyto	cytoplasm,cytoskeleton	cell organization and biogenesis,transport	metal ion binding,protein binding,enzyme regulator activity	Cytoplasm.		FYVE-type zinc finger (1); RabBD (Rab-binding) domain (1)
Q8NHM5-3		JHD1B_HUMAN	Q8NHM5-3	KDM2B	Isoform 3 of Lysine-specific demethylase 2B	Homo sapiens		X	0		_	nucl	nucl	nucl	membrane,nucleus,organelle lumen	regulation of biological process,cell organization and biogenesis,metabolic process,transport	catalytic activity,nucleotide binding,DNA binding,metal ion binding,protein binding,RNA binding,transporter activity	Nucleus > nucleolus.	JHDM1 histone demethylase family	CXXC-type zinc finger (1); F-box domain (1); JmjC domain (1); LRR (leucine-rich) repeats (4); PHD-type zinc finger (1)
Q8TAA3-5		PSA7L_HUMAN	Q8TAA3-5	PSMA8	Isoform 3 of Proteasome subunit alpha type-7-like	Homo sapiens		X	0		_	cyto	cyto	cyto,nucl	proteasome,cytoplasm,nucleus,cytosol	regulation of biological process,metabolic process,cell death,response to stimulus	catalytic activity	Cytoplasm. Nucleus.	Peptidase T1A family
Q8TCZ2-4	C99L2_HUMAN		Q8TCZ2-4	CD99L2	Isoform 4 of CD99 antigen-like protein 2	Homo sapiens	X		1	S	S	extr	plas	plas,plas	membrane,cell surface		protein binding	Cell membrane; Single-pass type I membrane protein; Extracellular side. Cell junction.	CD99 family
Q8TD10-3		MIPO1_HUMAN	Q8TD10-3	MIPOL1	Isoform 3 of Mirror-image polydactyly gene 1 protein	Homo sapiens		X	0		_	cyto	-	-	cytoplasm,nucleus,cytoskeleton
Q8TDD1-2		DDX54_HUMAN	Q8TDD1-2	DDX54	Isoform 2 of ATP-dependent RNA helicase DDX54	Homo sapiens		X	0		_	nucl	nucl	nucl	nucleus,organelle lumen	regulation of biological process,metabolic process,cell communication	catalytic activity,transcription regulator activity,nucleotide binding,signal transducer activity,protein binding,RNA binding	Nucleus > nucleolus.	DEAD box helicase family, DDX54/DBP10 subfamily	Helicase ATP-binding domain (1); Helicase C-terminal domain (1)
Q8TDX7		NEK7_HUMAN	Q8TDX7	NEK7	Serine/threonine-protein kinase Nek7	Homo sapiens		X	0		_	cyto	nucl	cyto	cytoplasm,nucleus	regulation of biological process,metabolic process,response to stimulus	catalytic activity,nucleotide binding,DNA binding,metal ion binding,protein binding	Cytoplasm.	Protein kinase superfamily, NEK Ser/Thr protein kinase family, NIMA subfamily	Protein kinase domain (1)
Q8WUD1	RAB2B_HUMAN		Q8WUD1	RAB2B	Ras-related protein Rab-2B	Homo sapiens	X		0		_	cyto	plas	plas,E.R.,golg	membrane,Golgi,cytoplasm,endoplasmic reticulum	regulation of biological process,cell organization and biogenesis,metabolic process,transport,cell communication	catalytic activity,DNA binding,nucleotide binding,protein binding	Cell membrane; Lipid-anchor; Cytoplasmic side. Endoplasmic reticulum membrane. Golgi apparatus membrane.	Small GTPase superfamily, Rab family
Q8WW24	TEKT4_HUMAN		Q8WW24	TEKT4	Tektin-4	Homo sapiens	X		0		_	cyto	-	plas,cyto,cyto	cytoplasm,cytoskeleton	cell organization and biogenesis	structural molecule activity	Cell projection > cilium > flagellum. Cytoplasm > cytoskeleton > flagellum axoneme. Cytoplasm > cytoskeleton > cilium axoneme.	Tektin family
Q8WWI1-4		LMO7_HUMAN	Q8WWI1-4	LMO7	Isoform 4 of LIM domain only protein 7	Homo sapiens		X	1		S	nucl	cyto	-	membrane,cytoplasm,nucleus	metabolic process	catalytic activity,metal ion binding,protein binding			CH (calponin-homology) domain (1); LIM zinc-binding domain (1); PDZ (DHR) domain (1)
Q8WX93-7	PALLD_HUMAN		Q8WX93-7	PALLD	Isoform 7 of Palladin	Homo sapiens	X		0		_	nucl	cyto	cyto,plas,plas,plas,cyto	membrane,cytoplasm,nucleus,cytoskeleton	cell differentiation,development,cell organization and biogenesis,metabolic process,cell death,transport	catalytic activity,nucleotide binding,signal transducer activity,protein binding,receptor activity	Cytoplasm > cytoskeleton. Cell junction > focal adhesion. Cell projection > ruffle. Cell projection > lamellipodium. Cytoplasm > myofibril > sarcomere > Z-disk.	Myotilin/palladin family	Ig-like C2-type (immunoglobulin-like) domains (5)
Q8WZ42-8	TITIN_HUMAN	TITIN_HUMAN	Q8WZ42-8	TTN	Isoform 8 of Titin	Homo sapiens	X	X	7		n.a	cyto	cyto	cyto,nucl	membrane,cytoplasm,cytosol,nucleus,extracellular,cytoskeleton,chromosome	coagulation,regulation of biological process,cell differentiation,development,cell organization and biogenesis,metabolic process,response to stimulus,transport,cell communication	catalytic activity,nucleotide binding,structural molecule activity,metal ion binding,signal transducer activity,antioxidant activity,protein binding,enzyme regulator activity,transporter activity,receptor activity	Cytoplasm. Nucleus.	Protein kinase superfamily, CAMK Ser/Thr protein kinase family	Fibronectin type-III domains (132); Ig-like (immunoglobulin-like) domains (152); Kelch repeats (19); Protein kinase domain (1); RCC1 repeats (17); TPR repeats (14); WD repeats (15)
Q92499	DDX1_HUMAN	DDX1_HUMAN	Q92499	DDX1	ATP-dependent RNA helicase DDX1	Homo sapiens	X	X	0		_	cyto	nucl	nucl,cyto,cyto	cytoplasm,nucleus	cell differentiation,regulation of biological process,reproduction,development,cell organization and biogenesis,metabolic process,response to stimulus	catalytic activity,DNA binding,nucleotide binding,transcription regulator activity,protein binding,RNA binding	Nucleus. Cytoplasm. Cytoplasmic granule.	DEAD box helicase family, DDX1 subfamily	B30.2/SPRY domain (1); Helicase ATP-binding domain (1); Helicase C-terminal domain (1)
Q92520	FAM3C_HUMAN		Q92520	WNT16	Protein FAM3C	Homo sapiens	X		0	S	S	extr	extr	extr,cyve	membrane,cytoplasm,extracellular	cell differentiation,regulation of biological process,development,cell organization and biogenesis,metabolic process,cell proliferation,cell death,response to stimulus,cell communication	catalytic activity,structural molecule activity,signal transducer activity,protein binding	Secreted. Cytoplasmic vesicle.	FAM3 family
Q92614-5		MY18A_HUMAN	Q92614-5	MYO18A	Isoform 5 of Myosin-XVIIIa	Homo sapiens		X	1		_	nucl	cyto	E.R._golg,cyto,cyto	membrane,Golgi,cytoplasm,nucleus,organelle lumen,cytoskeleton,chromosome	cell differentiation,regulation of biological process,development,cell organization and biogenesis,metabolic process,cell death,transport	catalytic activity,nucleotide binding,DNA binding,transcription regulator activity,structural molecule activity,protein binding,motor activity,transporter activity	Endoplasmic reticulum-Golgi intermediate compartment. Cytoplasm > cytoskeleton. Cytoplasm.		IQ domain (1); Myosin head-like domain (1); PDZ (DHR) domain (1)
Q92625		ANKS1_HUMAN	Q92625	ANKS1A	Ankyrin repeat and SAM domain-containing protein 1A	Homo sapiens		X	0		_	nucl	cyto	cyto	cytoplasm,nucleus,extracellular,organelle lumen	regulation of biological process,cell differentiation,reproduction,development,cell organization and biogenesis,metabolic process,cell proliferation,response to stimulus,transport	catalytic activity,metal ion binding,protein binding	Cytoplasm.		ANK repeats (6); PID domain (1); SAM (sterile alpha motif) domains (2)
Q92743	HTRA1_HUMAN	HTRA1_HUMAN	Q92743	HTRA1	Serine protease HTRA1	Homo sapiens	X	X	0	S	S	extr	extr	extr	extracellular	regulation of biological process,development,cell organization and biogenesis,cell growth,metabolic process,cell communication	catalytic activity,protein binding	Secreted.	Peptidase S1B family	IGFBP N-terminal domain (1); Kazal-like domain (1); PDZ (DHR) domain (1)
Q92804-2		RBP56_HUMAN	Q92804-2	TAF15	Isoform Short of TATA-binding protein-associated factor 2N	Homo sapiens		X	0		_	nucl	nucl	nucl,cyto	cytoplasm,nucleus,organelle lumen		DNA binding,nucleotide binding,transcription regulator activity,metal ion binding,RNA binding	Nucleus. Cytoplasm.	RRM TET family	RanBP2-type zinc finger (1); RRM (RNA recognition motif) domain (1)
Q92841-4		DDX17_HUMAN	Q92841-4	DDX17	Isoform 4 of Probable ATP-dependent RNA helicase DDX17	Homo sapiens		X	0	S	_	nucl	nucl	nucl	nucleus	metabolic process,response to stimulus	catalytic activity,nucleotide binding,RNA binding	Nucleus.	DEAD box helicase family, DDX5/DBP2 subfamily	Helicase ATP-binding domain (1); Helicase C-terminal domain (1)
Q92879-1		CUGB1_HUMAN	Q92879-1	CELF1	CUGBP Elav-like family member 1	Homo sapiens		X	0		_	nucl	nucl	nucl,cyto	ribosome,cytoplasm,cytosol,nucleus,mitochondrion	regulation of biological process,cell differentiation,reproduction,development,cell organization and biogenesis,metabolic process,response to stimulus	translation regulator activity,catalytic activity,nucleotide binding,transcription regulator activity,DNA binding,structural molecule activity,metal ion binding,protein binding,RNA binding	Nucleus. Cytoplasm.	CELF/BRUNOL family	RRM (RNA recognition motif) domains (3)
Q92922		SMRC1_HUMAN	Q92922	SMARCC1	SWI/SNF complex subunit SMARCC1	Homo sapiens		X	2		_	cyto	nucl	nucl	membrane,cytoplasm,nucleus,extracellular,organelle lumen,cytoskeleton,chromosome	defense response,regulation of biological process,reproduction,development,cell organization and biogenesis,metabolic process,response to stimulus,cell communication	catalytic activity,DNA binding,transcription regulator activity,protein binding	Nucleus.	SMARCC family	SANT domain (1); SWIRM domain (1)
Q92945-2	FUBP2_HUMAN	FUBP2_HUMAN	Q92945-2	KHSRP	Isoform 2 of Far upstream element-binding protein 2	Homo sapiens	X	X	0		_	cyto	nucl	nucl,cyto	membrane,cytoplasm,nucleus,cytosol,extracellular	regulation of biological process,metabolic process,transport,cell communication	catalytic activity,nucleotide binding,DNA binding,structural molecule activity,signal transducer activity,protein binding,RNA binding,receptor activity	Nucleus. Cytoplasm.	KHSRP family	KH domains (4)
Q92973-3		TNPO1_HUMAN	Q92973-3	TNPO1	Isoform 3 of Transportin-1	Homo sapiens		X	2		_	cyto	nucl	cyto,nucl	membrane,cytoplasm,nucleus,cytosol	metabolic process,transport	protein binding,transporter activity	Cytoplasm. Nucleus.	Importin beta family	HEAT repeats (8); Importin N-terminal domain (1)
Q969G3-2		SMCE1_HUMAN	Q969G3-2	SMARCE1	Isoform 2 of SWI/SNF-related matrix-associated actin-dependent regulator of chromatin subfamily E member 1	Homo sapiens		X	0		_	nucl	nucl	nucl	nucleus,organelle lumen,chromosome	regulation of biological process,development,cell organization and biogenesis,metabolic process	catalytic activity,DNA binding,transcription regulator activity,protein binding	Nucleus.		HMG box DNA-binding domain (1)
Q969G5	PRDBP_HUMAN		Q969G5	PRKCDBP	Protein kinase C delta-binding protein	Homo sapiens	X		0		_	extr	cyto	-		regulation of biological process	catalytic activity,protein binding		PTRF/SDPR family
Q969P0-3	IGSF8_HUMAN		Q969P0-3	IGSF8	Isoform 3 of Immunoglobulin superfamily member 8	Homo sapiens	X		1	S	S	extr	plas	plas	membrane	reproduction,cellular component movement,development,metabolic process,cell proliferation	catalytic activity,nucleotide binding,signal transducer activity,protein binding,receptor activity	Membrane; Single-pass membrane protein.		Ig-like C2-type (immunoglobulin-like) domains (4)
Q969Q0	RL36L_HUMAN		Q969Q0	RPL36AL	60S ribosomal protein L36a-like	Homo sapiens	X		0		_	extr	cyto	cyto	membrane,ribosome,cytoplasm,cytosol,nucleus,endoplasmic reticulum	regulation of biological process,cell organization and biogenesis,metabolic process,response to stimulus,transport,cell communication	translation regulator activity,catalytic activity,nucleotide binding,transcription regulator activity,structural molecule activity,metal ion binding,protein binding,enzyme regulator activity,RNA binding,transporter activity	Cytoplasm.	Ribosomal protein L44e family
Q96A32	MLRS_HUMAN		Q96A32	MYLPF	Myosin regulatory light chain 2, skeletal muscle isoform	Homo sapiens	X		0		M	mito	cyto	-	cytoplasm,cytoskeleton	development,response to stimulus	catalytic activity,structural molecule activity,metal ion binding,motor activity			EF-hand domains (3)
Q96AE4-2	FUBP1_HUMAN	FUBP1_HUMAN	Q96AE4-2	FUBP1	Isoform 2 of Far upstream element-binding protein 1	Homo sapiens	X	X	0		_	cyto	nucl	nucl	cytoplasm,nucleus,organelle lumen	regulation of biological process,metabolic process,transport	DNA binding,protein binding,RNA binding	Nucleus.		KH domains (4)
Q96AG4	LRC59_HUMAN	LRC59_HUMAN	Q96AG4	LRRC59	Leucine-rich repeat-containing protein 59	Homo sapiens	X	X	1		_		cyto	E.R.,E.R.	membrane,cytoplasm,nucleus,endoplasmic reticulum,mitochondrion,organelle lumen,chromosome	cell organization and biogenesis,metabolic process,transport	catalytic activity,DNA binding,protein binding,transporter activity	Microsome membrane; Single-pass type II membrane protein. Endoplasmic reticulum membrane; Single-pass type II membrane protein.		LRR (leucine-rich) repeats (5)
Q96AQ6-3	PBIP1_HUMAN		Q96AQ6-3	PBXIP1	Isoform 3 of Pre-B-cell leukemia transcription factor-interacting protein 1	Homo sapiens	X		1		_	E.R.	nucl	cyto,nucl	cytoplasm,nucleus,cytosol,cytoskeleton	regulation of biological process,cell differentiation,development,metabolic process	DNA binding,transcription regulator activity,protein binding	Cytoplasm > cytoskeleton. Nucleus.
Q96AY3	FKB10_HUMAN		Q96AY3	FKBP10	Peptidyl-prolyl cis-trans isomerase FKBP10	Homo sapiens	X		1	S	S	extr	cyto	E.R.	cytoplasm,endoplasmic reticulum,extracellular,organelle lumen	metabolic process	catalytic activity,metal ion binding,protein binding	Endoplasmic reticulum lumen.		EF-hand domains (2); PPIase FKBP-type domains (4)
Q96C36	P5CR2_HUMAN		Q96C36	PYCR2	Pyrroline-5-carboxylate reductase 2	Homo sapiens	X		0	S	M	extr	cyto	-	membrane,cytoplasm	metabolic process,transport	catalytic activity,nucleotide binding,transporter activity		Pyrroline-5-carboxylate reductase family		Amino-acid biosynthesis; L-proline biosynthesis; L-proline from L-glutamate 5-semialdehyde: step 1/1.
Q96CW1-2		AP2M1_HUMAN	Q96CW1-2	AP2M1	Isoform 2 of AP-2 complex subunit mu	Homo sapiens		X	1		_	cyto	cyto	plas,plas	membrane,Golgi,cytoplasm,cytosol,mitochondrion	defense response,cell differentiation,regulation of biological process,development,cell organization and biogenesis,metabolic process,response to stimulus,transport,cell communication	catalytic activity,protein binding,transporter activity	Cell membrane. Membrane > coated pit; Peripheral membrane protein; Cytoplasmic side.	Adaptor complexes medium subunit family	MHD (mu homology) domain (1)
Q96DI7	SNR40_HUMAN	WDR57_HUMAN	Q96DI7	SNRNP40	U5 small nuclear ribonucleoprotein 40 kDa protein	Homo sapiens	X	X	0		_	nucl	nucl	nucl	spliceosomal complex,membrane,cytoplasm,nucleus,cytosol,extracellular,organelle lumen,cytoskeleton	defense response,cell differentiation,regulation of biological process,reproduction,development,cell organization and biogenesis,cell proliferation,metabolic process,cell death,response to stimulus,transport,cell communication	catalytic activity,DNA binding,nucleotide binding,metal ion binding,protein binding,RNA binding	Nucleus.		WD repeats (7)
Q96EP5-2		DAZP1_HUMAN	Q96EP5-2	DAZAP1	Isoform 2 of DAZ-associated protein 1	Homo sapiens		X	0		_	cyto_nucl	cyto	cyto,nucl	membrane,cytoplasm,nucleus,mitochondrion,organelle lumen	regulation of biological process,cell differentiation,reproduction,development,cell communication	nucleotide binding,signal transducer activity,RNA binding,receptor activity	Cytoplasm. Nucleus.		RRM (RNA recognition motif) domains (2)
Q96FV9-3		THOC1_HUMAN	Q96FV9-3	THOC1	Isoform 3 of THO complex subunit 1	Homo sapiens		X	0		_	nucl	nucl	nucl,nucl,nucl,cyto,cyto	cytoplasm,nucleus,organelle lumen	regulation of biological process,reproduction,metabolic process,cell death,transport	DNA binding,transcription regulator activity,protein binding,RNA binding	Nucleus speckle. Nucleus > nucleoplasm. Nucleus matrix. Cytoplasm. Cytoplasm.		Death domain (1)
Q96HC4-4		PDLI5_HUMAN	Q96HC4-4	PDLIM5	Isoform 4 of PDZ and LIM domain protein 5	Homo sapiens		X	0		_	nucl	cyto	plas,plas,cyto	membrane,cytoplasm,cytosol,cytoskeleton	regulation of biological process,cell differentiation,development,cell organization and biogenesis,cell communication	metal ion binding,protein binding	Cell junction > synapse > postsynaptic cell membrane > postsynaptic density. Cell junction > synapse > synaptosome. Cytoplasm.		LIM zinc-binding domains (3); PDZ (DHR) domain (1)
Q96HY6-2	DDRGK_HUMAN		Q96HY6-2	DDRGK1	Isoform 2 of DDRGK domain-containing protein 1	Homo sapiens	X		0	S	S	extr	extr	E.R.	cytoplasm,endoplasmic reticulum,extracellular		protein binding	Endoplasmic reticulum.	DDRGK1 family	PCI domain (1)
Q96I24-2		FUBP3_HUMAN	Q96I24-2	FUBP3	Isoform 2 of Far upstream element-binding protein 3	Homo sapiens		X	0		_	cysk	nucl	nucl	nucleus	regulation of biological process,metabolic process	DNA binding,transcription regulator activity,protein binding,RNA binding	Nucleus.		KH domains (4)
Q96IX5	USMG5_HUMAN		Q96IX5	USMG5	Up-regulated during skeletal muscle growth protein 5	Homo sapiens	X		1		_	cyto	cyto	mito	membrane,cytoplasm,mitochondrion	metabolic process	catalytic activity,metal ion binding	Mitochondrion membrane; Single-pass membrane protein.
Q96IZ0		PAWR_HUMAN	Q96IZ0	PAWR	PRKC apoptosis WT1 regulator protein	Homo sapiens		X	0		_	nucl	nucl	cyto,nucl	membrane,cytoplasm,nucleus,cytoskeleton	defense response,regulation of biological process,cell differentiation,cell organization and biogenesis,cell proliferation,metabolic process,cell death,response to stimulus,cell communication	transcription regulator activity,protein binding	Cytoplasm. Nucleus.
Q96JP5-2		ZFP91_HUMAN	Q96JP5-2	ZFP91-CNTF	Isoform 2 of E3 ubiquitin-protein ligase ZFP91	Homo sapiens		X	1		_	nucl	nucl	nucl	nucleus,organelle lumen	regulation of biological process,metabolic process,response to stimulus,cell communication	catalytic activity,DNA binding,metal ion binding	Nucleus.	Krueppel C2H2-type zinc-finger protein family	C2H2-type zinc fingers (5)	Protein modification; protein ubiquitination.
Q96ME7		ZN512_HUMAN	Q96ME7	ZNF512	Zinc finger protein 512	Homo sapiens		X	0		M	nucl	nucl	nucl	nucleus	regulation of biological process,metabolic process	DNA binding,metal ion binding	Nucleus.	Krueppel C2H2-type zinc-finger protein family	C2H2-type zinc fingers (4)
Q96PK2-1	MACF4_HUMAN	MACF4_HUMAN	Q96PK2-1	MACF1	Microtubule-actin cross-linking factor 1, isoform 4	Homo sapiens	X	X	1		n.a	cyto	cyto	cyto	cytoplasm,cytoskeleton	regulation of biological process,development,cellular component movement,cell organization and biogenesis,metabolic process,transport,cell communication	catalytic activity,metal ion binding,protein binding,motor activity	Cytoplasm > cytoskeleton.	Plakin or cytolinker family	EF-hand domains (2); GAR domain (1); Plectin repeats (19); Spectrin repeats (32)
Q96PK6-2		RBM14_HUMAN	Q96PK6-2	RBM14	Isoform 2 of RNA-binding protein 14	Homo sapiens		X	0		_	nucl	nucl	nucl	nucleus,organelle lumen	regulation of biological process,cell organization and biogenesis,metabolic process,response to stimulus	nucleotide binding,transcription regulator activity,protein binding,RNA binding	Nucleus.		RRM (RNA recognition motif) domains (2)
Q96QR8		PURB_HUMAN	Q96QR8	PURB	Transcriptional activator protein Pur-beta	Homo sapiens		X	0		_	cyto	nucl	nucl	cytoplasm,nucleus,chromosome	regulation of biological process,cell differentiation,development,metabolic process,cell proliferation,cell death	translation regulator activity,catalytic activity,nucleotide binding,transcription regulator activity,DNA binding,protein binding,RNA binding	Nucleus.	PUR DNA-binding protein family
Q96QV6		H2A1A_HUMAN	Q96QV6	HIST1H2AA	Histone H2A type 1-A	Homo sapiens		X	1		_	nucl	nucl	nucl,nucl	nucleus,chromosome	cell differentiation,cell organization and biogenesis,metabolic process	DNA binding	Nucleus. Chromosome.	Histone H2A family
Q96RK0	CIC_HUMAN	CIC_HUMAN	Q96RK0	CIC	Protein capicua homolog	Homo sapiens	X	X	0		M	nucl	nucl	nucl	membrane,Golgi,endosome,cytoplasm,nucleus,extracellular	regulation of biological process,cellular component movement,development,cell organization and biogenesis,metabolic process,cell death,response to stimulus,transport,cell communication	catalytic activity,nucleotide binding,DNA binding,protein binding,transporter activity	Nucleus.		HMG box DNA-binding domain (1)
Q96RN5-1		PCQAP_HUMAN	Q96RN5-1	MED15	Mediator of RNA polymerase II transcription subunit 15	Homo sapiens		X	0		_	nucl	nucl	cyto,nucl	Golgi,cytoplasm,nucleus,organelle lumen	regulation of biological process,metabolic process,response to stimulus	catalytic activity,DNA binding,transcription regulator activity,structural molecule activity,metal ion binding,protein binding	Cytoplasm. Nucleus.	Mediator complex subunit 15 family
Q96S66-4	CLCC1_HUMAN		Q96S66-4	CLCC1	Isoform 4 of Chloride channel CLIC-like protein 1	Homo sapiens	X		2	S	S	plas	cyto	plas,E.R.,golg,nucl	membrane,Golgi,cytoplasm,nucleus,endoplasmic reticulum,mitochondrion	transport	transporter activity	Membrane; Multi-pass membrane protein. Endoplasmic reticulum. Golgi apparatus. Nucleus.	Chloride channel MCLC family
Q96SB3		NEB2_HUMAN	Q96SB3	PPP1R9B	Neurabin-2	Homo sapiens		X	0		_	nucl	cyto	cyto,nucl,plas,plas	membrane,cytoplasm,nucleus,organelle lumen,cytoskeleton	cell differentiation,regulation of biological process,development,cell organization and biogenesis,cell growth,cell proliferation,metabolic process,response to stimulus,cell communication	catalytic activity,nucleotide binding,structural molecule activity,protein binding,enzyme regulator activity	Cytoplasm > cytoskeleton. Nucleus. Cell projection > dendritic spine. Cell junction > synapse.		PDZ (DHR) domain (1)
Q96T58		MINT_HUMAN	Q96T58	SPEN	Msx2-interacting protein	Homo sapiens		X	3		_	nucl	nucl	nucl	membrane,Golgi,cytoplasm,nucleus,mitochondrion,organelle lumen	regulation of biological process,metabolic process,transport,cell communication	catalytic activity,DNA binding,nucleotide binding,transcription regulator activity,metal ion binding,protein binding,RNA binding	Nucleus.	RRM Spen family	RID (receptor interacting) domain (1); RRM (RNA recognition motif) domains (4); SPOC domain (1)
Q99436		PSB7_HUMAN	Q99436	PSMB7	Proteasome subunit beta type-7	Homo sapiens		X	1		_	cyto	cyto	cyto,nucl	proteasome,membrane,cytoplasm,nucleus,cytosol,mitochondrion,cytoskeleton	regulation of biological process,metabolic process,cell death,response to stimulus,transport	catalytic activity,metal ion binding,protein binding	Cytoplasm. Nucleus.	Peptidase T1B family
Q99439		CNN2_HUMAN	Q99439	CNN2	Calponin-2	Homo sapiens		X	0		_	cyto	cyto	-	membrane,cytoskeleton	regulation of biological process,cellular component movement,development,cell organization and biogenesis,cell proliferation,metabolic process,response to stimulus,transport	protein binding		Calponin family	Calponin-like repeats (3); CH (calponin-homology) domain (1)
Q99459		CDC5L_HUMAN	Q99459	CDC5L	Cell division cycle 5-like protein	Homo sapiens		X	0		_	nucl	nucl	nucl,cyto	spliceosomal complex,cytoplasm,nucleus,organelle lumen	regulation of biological process,metabolic process	DNA binding,protein binding,RNA binding	Nucleus speckle. Cytoplasm.	CEF1 family	HTH myb-type DNA-binding domains (2)
Q99460-2		PSMD1_HUMAN	Q99460-2	PSMD1	Isoform 2 of 26S proteasome non-ATPase regulatory subunit 1	Homo sapiens		X	4		_	cyto	cyto	-	proteasome,cytoplasm,cytosol	regulation of biological process,metabolic process,cell death,response to stimulus	protein binding,enzyme regulator activity		Proteasome subunit S1 family	PC repeats (10)
Q99536	VAT1_HUMAN	VAT1_HUMAN	Q99536	VAT1	Synaptic vesicle membrane protein VAT-1 homolog	Homo sapiens	X	X	2		_	cyto	plas	cyto	membrane,cytoplasm,nucleus	regulation of biological process,development,cell organization and biogenesis,cell growth,metabolic process,response to stimulus	catalytic activity,nucleotide binding,DNA binding,metal ion binding	Cytoplasm.	Zinc-containing alcohol dehydrogenase family, Quinone oxidoreductase subfamily
Q99575		POP1_HUMAN	Q99575	POP1	Ribonucleases P/MRP protein subunit POP1	Homo sapiens		X	3		_	nucl	nucl	nucl	membrane,nucleus,organelle lumen	reproduction,metabolic process,transport	catalytic activity,nucleotide binding,structural molecule activity,protein binding,RNA binding	Nucleus > nucleolus.
Q99623	PHB2_HUMAN	PHB2_HUMAN	Q99623	PHB2	Prohibitin-2	Homo sapiens	X	X	0		_	cyto	cyto	mito,cyto,nucl	membrane,cytoplasm,nucleus,extracellular,mitochondrion	defense response,regulation of biological process,reproduction,development,cell organization and biogenesis,metabolic process,cell proliferation,response to stimulus,transport,cell communication	catalytic activity,transcription regulator activity,metal ion binding,signal transducer activity,protein binding,receptor activity	Mitochondrion inner membrane. Cytoplasm. Nucleus.	Prohibitin family
Q99714-2	HCD2_HUMAN		Q99714-2	HSD17B10	Isoform 2 of 3-hydroxyacyl-CoA dehydrogenase type-2	Homo sapiens	X		0	S	_	mito	cyto	mito	membrane,cytoplasm,endoplasmic reticulum,mitochondrion,organelle lumen	cell differentiation,reproduction,development,cell organization and biogenesis,metabolic process	catalytic activity,nucleotide binding,protein binding	Mitochondrion.	Short-chain dehydrogenases/reductases (SDR) family
Q99719		SEPT5_HUMAN	Q99719	SEPT5	Septin-5	Homo sapiens		X	0		_	cyto	cyto	cyto,cyto	membrane,Golgi,cytoplasm,endoplasmic reticulum,cytoskeleton	regulation of biological process,cell division,development,cell organization and biogenesis,metabolic process,transport,cell communication	catalytic activity,nucleotide binding,structural molecule activity,signal transducer activity,protein binding,receptor activity	Cytoplasm. Cytoplasm > cytoskeleton.	Septin family
Q99729-4		ROAA_HUMAN	Q99729-4	HNRNPAB	Isoform 4 of Heterogeneous nuclear ribonucleoprotein A/B	Homo sapiens		X	0	S	_	nucl	nucl	nucl,cyto	cytoplasm,nucleus	cell differentiation,regulation of biological process,development,cell organization and biogenesis,metabolic process	catalytic activity,nucleotide binding,DNA binding,protein binding,RNA binding	Nucleus. Cytoplasm.		RRM (RNA recognition motif) domains (2)
Q99798	ACON_HUMAN		Q99798	ACO2	Aconitate hydratase, mitochondrial	Homo sapiens	X		1		M	mito	cyto	mito	cytoplasm,nucleus,mitochondrion,organelle lumen	metabolic process	catalytic activity,nucleotide binding,metal ion binding	Mitochondrion.	Aconitase/IPM isomerase family		Carbohydrate metabolism; tricarboxylic acid cycle; isocitrate from oxaloacetate: step 2/2.
Q99832		TCPH_HUMAN	Q99832	CCT7	T-complex protein 1 subunit eta	Homo sapiens		X	1		_	cyto	cyto	cyto	membrane,Golgi,endosome,cytoplasm,cytosol,extracellular,mitochondrion	regulation of biological process,metabolic process,response to stimulus	nucleotide binding,structural molecule activity,protein binding	Cytoplasm.	TCP-1 chaperonin family
Q99873-3		ANM1_HUMAN	Q99873-3	PRMT1	Isoform 3 of Protein arginine N-methyltransferase 1	Homo sapiens		X	1		_	cysk	nucl	nucl,cyto	cytoplasm,nucleus,cytosol	defense response,development,cell organization and biogenesis,metabolic process,response to stimulus	catalytic activity,protein binding	Nucleus. Cytoplasm > cytosol.	Protein arginine N-methyltransferase family
Q9BR76		COR1B_HUMAN	Q9BR76	CORO1B	Coronin-1B	Homo sapiens		X	0		M	plas	cyto	cyto	cytoplasm,cytoskeleton		protein binding	Cytoplasm > cytoskeleton.	WD repeat coronin family	WD repeats (5)
Q9BS26	ERP44_HUMAN		Q9BS26	ERP44	Endoplasmic reticulum resident protein 44	Homo sapiens	X		0	S	S	pero	cyto	E.R.	membrane,cytoplasm,endoplasmic reticulum,extracellular,organelle lumen	regulation of biological process,cell organization and biogenesis,cellular homeostasis,metabolic process,response to stimulus,transport	catalytic activity,metal ion binding,protein binding	Endoplasmic reticulum lumen.		Thioredoxin domain (1)
Q9BSJ8-2	ESYT1_HUMAN		Q9BSJ8-2	ESYT1	Isoform 2 of Extended synaptotagmin-1	Homo sapiens	X		3		_	plas	-	plas	membrane	regulation of biological process,cell communication	signal transducer activity,protein binding,receptor activity	Membrane; Multi-pass membrane protein.	Extended synaptotagmin family	C2 domains (5)
Q9BT78		CSN4_HUMAN	Q9BT78	COPS4	COP9 signalosome complex subunit 4	Homo sapiens		X	0		_	cyto	cyto	cyto,nucl	cytoplasm,nucleus		protein binding	Cytoplasm. Nucleus.	CSN4 family	PCI domain (1)
Q9BUF5	TBB6_HUMAN	TBB6_HUMAN	Q9BUF5	TUBB6	Tubulin beta-6 chain	Homo sapiens	X	X	0		_	cyto_nucl	cyto	cyto	cytoplasm,cytoskeleton	cell organization and biogenesis,metabolic process,transport	catalytic activity,nucleotide binding,structural molecule activity	Cytoplasm > cytoskeleton.	Tubulin family
Q9BUJ2-5	HNRL1_HUMAN		Q9BUJ2-5	HNRNPUL1	Isoform 5 of Heterogeneous nuclear ribonucleoprotein U-like protein 1	Homo sapiens	X		1		_	nucl	nucl	nucl	nucleus,organelle lumen	regulation of biological process,metabolic process,response to stimulus	DNA binding,protein binding,RNA binding	Nucleus.		B30.2/SPRY domain (1); SAP domain (1)
Q9BUQ8		DDX23_HUMAN	Q9BUQ8	DDX23	Probable ATP-dependent RNA helicase DDX23	Homo sapiens		X	1		_	nucl	nucl	nucl	spliceosomal complex,nucleus,organelle lumen	cell differentiation,cell organization and biogenesis,metabolic process	catalytic activity,nucleotide binding,protein binding,RNA binding	Nucleus.	DEAD box helicase family, DDX23/PRP28 subfamily	Helicase ATP-binding domain (1); Helicase C-terminal domain (1)
Q9BWF3-3		RBM4_HUMAN	Q9BWF3-3	RBM4	Isoform 3 of RNA-binding protein 4	Homo sapiens		X	0		_	cyto_nucl	nucl	nucl,nucl,cyto	cytoplasm,nucleus,organelle lumen	defense response,metabolic process,response to stimulus	nucleotide binding,metal ion binding,RNA binding	Nucleus. Nucleus > nucleolus. Cytoplasm.		CCHC-type zinc finger (1); RRM (RNA recognition motif) domains (2)
Q9BWJ5		SF3B5_HUMAN	Q9BWJ5	SF3B5	Splicing factor 3B subunit 5	Homo sapiens		X	0		_	extr	nucl	nucl	spliceosomal complex,nucleus,organelle lumen	metabolic process	protein binding	Nucleus.	SF3B5 family
Q9BWM7	SFXN3_HUMAN		Q9BWM7	SFXN3	Sideroflexin-3	Homo sapiens	X		3		_	cyto	cyto	mito	membrane,cytoplasm,mitochondrion	transport	metal ion binding,transporter activity	Mitochondrion membrane; Multi-pass membrane protein.	Sideroflexin family
Q9BX66-9		SRBS1_HUMAN	Q9BX66-9	SORBS1	Isoform 9 of Sorbin and SH3 domain-containing protein 1	Homo sapiens		X	0		_	nucl	plas	plas,plas,cyto,plas	membrane,cytoplasm,nucleus,cytosol,organelle lumen,cytoskeleton	regulation of biological process,cell organization and biogenesis,metabolic process,response to stimulus,transport	signal transducer activity,protein binding	Cell junction > adherens junction. Cell membrane. Cytoplasm > cytoskeleton. Cell junction > focal adhesion.		SH3 domains (3); SoHo domain (1)
Q9BXP5-4		ARS2_HUMAN	Q9BXP5-4	SRRT	Isoform 4 of Serrate RNA effector molecule homolog	Homo sapiens		X	0		_	nucl	nucl	nucl,cyto	cytoplasm,nucleus,organelle lumen	regulation of biological process,cell proliferation,metabolic process,response to stimulus	nucleotide binding,protein binding	Nucleus > nucleoplasm. Cytoplasm.	ARS2 family
Q9BXP5-5	SRRT_HUMAN		Q9BXP5-5	SRRT	Isoform 5 of Serrate RNA effector molecule homolog	Homo sapiens	X		0		_	nucl	nucl	nucl,cyto	cytoplasm,nucleus,organelle lumen	regulation of biological process,metabolic process,cell proliferation,response to stimulus	protein binding	Nucleus > nucleoplasm. Cytoplasm.	ARS2 family
Q9BY77-2		PDIP3_HUMAN	Q9BY77-2	POLDIP3	Isoform 2 of Polymerase delta-interacting protein 3	Homo sapiens		X	0		_	cyto	nucl	nucl,nucl,cyto	cytoplasm,nucleus,organelle lumen	regulation of biological process,metabolic process	nucleotide binding,protein binding,RNA binding	Nucleus. Nucleus speckle. Cytoplasm.		RRM (RNA recognition motif) domain (1)
Q9BZF9		UACA_HUMAN	Q9BZF9	UACA	Uveal autoantigen with coiled-coil domains and ankyrin repeats	Homo sapiens		X	0		M	nucl	cyto	nucl,cyto,cyto	membrane,cytoplasm,cytosol,nucleus,extracellular,cytoskeleton,chromosome	defense response,regulation of biological process,cell differentiation,cell organization and biogenesis,metabolic process,cell death,response to stimulus,transport	catalytic activity,metal ion binding,protein binding	Nucleus. Cytoplasm. Cytoplasm > cytoskeleton.		ANK repeats (6)
Q9C0C2-2		TB182_HUMAN	Q9C0C2-2	TNKS1BP1	Isoform 2 of 182 kDa tankyrase-1-binding protein	Homo sapiens		X	0		_	nucl	nucl	nucl,cyto,nucl	cytoplasm,cytosol,nucleus,chromosome,cytoskeleton	cell organization and biogenesis,metabolic process	protein binding	Nucleus. Cytoplasm > cytoskeleton. Chromosome.
Q9GZR7		DDX24_HUMAN	Q9GZR7	DDX24	ATP-dependent RNA helicase DDX24	Homo sapiens		X	1		_	nucl	nucl	-	cytoplasm,nucleus,organelle lumen	metabolic process	catalytic activity,nucleotide binding,protein binding,RNA binding		DEAD box helicase family, DDX24/MAK5 subfamily	Helicase ATP-binding domain (1); Helicase C-terminal domain (1)
Q9H0D6-2		XRN2_HUMAN	Q9H0D6-2	XRN2	Isoform 2 of 5'-3' exoribonuclease 2	Homo sapiens		X	1		_	nucl	nucl	nucl	membrane,nucleus,organelle lumen	regulation of biological process,reproduction,cell organization and biogenesis,cell growth,metabolic process,response to stimulus	catalytic activity,metal ion binding,protein binding	Nucleus > nucleolus.	5'-3' exonuclease family, XRN2/RAT1 subfamily	CCHC-type zinc finger (1)
Q9H0U4	RAB1B_HUMAN		Q9H0U4	RAB1B	Ras-related protein Rab-1B	Homo sapiens	X		0		_	cyto	cyto	plas,cyto	membrane,Golgi,cytoplasm,mitochondrion	regulation of biological process,cell organization and biogenesis,metabolic process,transport,cell communication	catalytic activity,DNA binding,nucleotide binding,protein binding,transporter activity	Membrane; Lipid-anchor; Cytoplasmic side. Cytoplasm.	Small GTPase superfamily, Rab family
Q9H2G2-2		SLK_HUMAN	Q9H2G2-2	SLK	Isoform 2 of STE20-like serine/threonine-protein kinase	Homo sapiens		X	1		_	nucl	nucl	cyto	membrane,cytoplasm	metabolic process,cell death,response to stimulus	catalytic activity,DNA binding,nucleotide binding	Cytoplasm.	Protein kinase superfamily, STE Ser/Thr protein kinase family, STE20 subfamily	Protein kinase domain (1); UVR domain (1)
Q9H307-2		PININ_HUMAN	Q9H307-2	PNN	Isoform 2 of Pinin	Homo sapiens		X	0		_	nucl	plas	nucl,plas	membrane,spliceosomal complex,cytoplasm,nucleus,organelle lumen,cytoskeleton	regulation of biological process,metabolic process	DNA binding,structural molecule activity,protein binding	Nucleus speckle. Cell junction > desmosome.	Pinin family
Q9H3N1	TMX1_HUMAN		Q9H3N1	TMX1	Thioredoxin-related transmembrane protein 1	Homo sapiens	X		2	S	S	extr	cyto	plas,E.R.	membrane,Golgi,endosome,cytoplasm,nucleus,cytosol,endoplasmic reticulum,extracellular,cell surface	defense response,regulation of biological process,cell differentiation,development,cell organization and biogenesis,cellular homeostasis,metabolic process,cell proliferation,cell death,response to stimulus,transport,cell communication	catalytic activity,nucleotide binding,signal transducer activity,antioxidant activity,protein binding,receptor activity	Membrane; Single-pass type I membrane protein. Endoplasmic reticulum membrane; Single-pass type I membrane protein.		Thioredoxin domain (1)
Q9H3P7	GCP60_HUMAN		Q9H3P7	ACBD3	Golgi resident protein GCP60	Homo sapiens	X		0		_	nucl	cyto	golg,mito	membrane,Golgi,cytoplasm,mitochondrion	metabolic process,transport	protein binding	Golgi apparatus membrane; Peripheral membrane protein; Cytoplasmic side. Mitochondrion.		ACB (acyl-CoA-binding) domain (1); GOLD domain (1)
Q9H4G4		GAPR1_HUMAN	Q9H4G4	GLIPR2	Golgi-associated plant pathogenesis-related protein 1	Homo sapiens		X	0		_	cyto	cyto	golg	membrane,Golgi,cytoplasm,cytosol,extracellular	regulation of biological process,metabolic process	catalytic activity,nucleotide binding,DNA binding,metal ion binding	Golgi apparatus membrane; Lipid-anchor.	CRISP family
Q9H4M9		EHD1_HUMAN	Q9H4M9	EHD1	EH domain-containing protein 1	Homo sapiens		X	0		_	cyto	cyto	plas,endo,endo	membrane,ribosome,endosome,cytoplasm	coagulation,regulation of biological process,cell organization and biogenesis,metabolic process,response to stimulus,transport	catalytic activity,nucleotide binding,signal transducer activity,metal ion binding,protein binding,RNA binding,receptor activity	Cell membrane; Peripheral membrane protein; Cytoplasmic side. Early endosome membrane; Peripheral membrane protein. Recycling endosome membrane; Peripheral membrane protein.		EF-hand domain (1); EH domain (1)
Q9H6R4-4		NOL6_HUMAN	Q9H6R4-4	NOL6	Isoform 4 of Nucleolar protein 6	Homo sapiens		X	2		_	cyto	nucl	nucl,nucl	nucleus,organelle lumen,chromosome	metabolic process	protein binding,RNA binding	Nucleus > nucleolus. Chromosome.	NRAP family
Q9H987-2	SYP2L_HUMAN	SYP2L_HUMAN	Q9H987-2	SYNPO2L	Isoform 2 of Synaptopodin 2-like protein	Homo sapiens	X	X	0		_	nucl	cyto	cyto	membrane,cytoplasm,cytoskeleton	transport	protein binding,transporter activity	Cytoplasm > cytoskeleton.	Synaptopodin family	PDZ (DHR) domain (1)
Q9HBL0		TENS1_HUMAN	Q9HBL0	TNS1	Tensin-1	Homo sapiens		X	0		_	nucl	plas	plas,cyto	membrane,cytoplasm,cytoskeleton	regulation of biological process,cell differentiation,cellular component movement,cell organization and biogenesis,metabolic process,cell communication	catalytic activity,protein binding	Cell junction > focal adhesion. Cytoplasm > cytoskeleton.		C2 tensin-type domain (1); Phosphatase tensin-type domain (1); SH2 domain (1)
Q9HBU6	EKI1_HUMAN		Q9HBU6	ETNK1	Ethanolamine kinase 1	Homo sapiens	X		2		M	plas	cyto	cyto	cytoplasm,nucleus,cytosol	regulation of biological process,metabolic process	catalytic activity,nucleotide binding,protein binding,RNA binding	Cytoplasm.	Choline/ethanolamine kinase family		Phospholipid metabolism; phosphatidylethanolamine biosynthesis; phosphatidylethanolamine from ethanolamine: step 1/3.
Q9HC07	TM165_HUMAN		Q9HC07	TMEM165	Transmembrane protein 165	Homo sapiens	X		6	S	S	plas	plas	plas	membrane,extracellular			Membrane; Multi-pass membrane protein.	UPF0016 (TC 9.B.26) family
Q9NPE3		NOLA3_HUMAN	Q9NPE3	NOP10	H/ACA ribonucleoprotein complex subunit 3	Homo sapiens		X	0		_	cyto	nucl	nucl,nucl	membrane,nucleus,organelle lumen	cell organization and biogenesis,metabolic process,transport	signal transducer activity,protein binding,transporter activity,receptor activity	Nucleus > nucleolus. Nucleus > Cajal body.	NOP10 family
Q9NQC3-6	RTN4_HUMAN	RTN4_HUMAN	Q9NQC3-6	RTN4	Isoform 6 of Reticulon-4	Homo sapiens	X	X	2		_	plas	cyto	E.R.	membrane,cytoplasm,nucleus,endoplasmic reticulum,cytoskeleton	cell differentiation,regulation of biological process,development,cellular component movement,cell organization and biogenesis,cell growth,metabolic process,cell death,response to stimulus,transport,cell communication	catalytic activity,structural molecule activity,metal ion binding,protein binding	Endoplasmic reticulum membrane; Multi-pass membrane protein.		Reticulon domain (1)
Q9NR12-6	PDLI7_HUMAN	PDLI7_HUMAN	Q9NR12-6	PDLIM7	Isoform 6 of PDZ and LIM domain protein 7	Homo sapiens	X	X	0		_	nucl	cyto	cyto,cyto	membrane,cytoplasm,cytoskeleton	regulation of biological process,cell differentiation,development,cell organization and biogenesis,transport	metal ion binding,protein binding	Cytoplasm. Cytoplasm > cytoskeleton.		LIM zinc-binding domains (3); PDZ (DHR) domain (1)
Q9NR30-2		DDX21_HUMAN	Q9NR30-2	DDX21	Isoform 2 of Nucleolar RNA helicase 2	Homo sapiens		X	2		_	cyto_nucl	nucl	nucl	nucleus,organelle lumen		catalytic activity,nucleotide binding,protein binding,RNA binding	Nucleus > nucleolus.	DEAD box helicase family, DDX21/DDX50 subfamily	Helicase ATP-binding domain (1); Helicase C-terminal domain (1)
Q9NRA0-1		SPH2_HUMAN	Q9NRA0-1	SPHK2	Sphingosine kinase 2	Homo sapiens		X	3		_	nucl	cyto	cyto,plas,lyso	membrane,cytoplasm,cytosol,vacuole	regulation of biological process,cell differentiation,development,cell proliferation,metabolic process,cell death,cell communication	catalytic activity,nucleotide binding,protein binding	Cytoplasm. Membrane. Lysosome membrane.		DAGKc domain (1)
Q9NRC6		SPTN5_HUMAN	Q9NRC6	SPTBN5	Spectrin beta chain, brain 4	Homo sapiens		X	3		M	nucl	plas	cyto	membrane,cytoplasm,cytosol,cytoskeleton	regulation of biological process,cell differentiation,development,cell organization and biogenesis,cellular homeostasis,metabolic process,response to stimulus,transport	metal ion binding,protein binding	Cytoplasm > cytoskeleton.	Spectrin family	CH (calponin-homology) domains (2); PH domain (1); Spectrin repeats (31)
Q9NRP0	OSTC_HUMAN		Q9NRP0	OSTC	Oligosaccharyltransferase complex subunit OSTC	Homo sapiens	X		2		S	plas	-	plas	membrane,cytoplasm,endoplasmic reticulum	metabolic process,response to stimulus	catalytic activity,nucleotide binding	Membrane; Multi-pass membrane protein.	OSTC family
Q9NSC5-4		HOME3_HUMAN	Q9NSC5-4	HOMER3	Isoform 4 of Homer protein homolog 3	Homo sapiens		X	0		_	mito	plas	cyto,plas,plas	membrane,cytoplasm,cytoskeleton	transport	protein binding	Cytoplasm. Cell junction > synapse > postsynaptic cell membrane > postsynaptic density. Cell junction > synapse.	Homer family	WH1 domain (1)
Q9NVA2-2	SEP11_HUMAN	SEP11_HUMAN	Q9NVA2-2	2011-09-11	Isoform 2 of Septin-11	Homo sapiens	X	X	0		_	nucl	nucl	cyto,plas,plas,plas	membrane,cytoplasm,nucleus,cytoskeleton	cell division,cell organization and biogenesis	nucleotide binding,protein binding	Cytoplasm > cytoskeleton. Cell junction > synapse. Cell projection > dendritic spine. Cell projection > axon.	Septin family
Q9NX24		NOLA2_HUMAN	Q9NX24	NHP2	H/ACA ribonucleoprotein complex subunit 2	Homo sapiens		X	0		_	cyto	nucl	nucl,nucl	nucleus,organelle lumen	cell organization and biogenesis,metabolic process,transport	catalytic activity,metal ion binding,protein binding,RNA binding,transporter activity	Nucleus > nucleolus. Nucleus > Cajal body.	Ribosomal protein L7Ae family
Q9NYF8-4		BCLF1_HUMAN	Q9NYF8-4	BCLAF1	Isoform 4 of Bcl-2-associated transcription factor 1	Homo sapiens		X	0		M	nucl	nucl	cyto,nucl	cytoplasm,nucleus,organelle lumen	regulation of biological process,metabolic process,cell death	DNA binding,transcription regulator activity,protein binding	Cytoplasm. Nucleus.
Q9NYL9		TMOD3_HUMAN	Q9NYL9	TMOD3	Tropomodulin-3	Homo sapiens		X	1		_	cyto	cyto	cyto	cytoplasm,cytoskeleton		protein binding	Cytoplasm > cytoskeleton.	Tropomodulin family
Q9NYU2-1	UGGG1_HUMAN		Q9NYU2-1	UGGT1	UDP-glucose:glycoprotein glucosyltransferase 1	Homo sapiens	X		3	S	S	plas	cyto	E.R.,E.R._golg	membrane,cytoplasm,nucleus,endoplasmic reticulum,cytosol,organelle lumen	metabolic process	catalytic activity,protein binding	Endoplasmic reticulum lumen. Endoplasmic reticulum-Golgi intermediate compartment.	Glycosyltransferase 8 family		Protein modification; protein glycosylation.
Q9NZM1-8	MYOF_HUMAN		Q9NZM1-8	MYOF	Isoform 8 of Myoferlin	Homo sapiens	X		1		_	pero	nucl	plas,nucl,cyve	membrane,cytoplasm,nucleus,cytoskeleton	cell organization and biogenesis,response to stimulus	protein binding	Cell membrane; Single-pass type II membrane protein. Nucleus membrane; Single-pass type II membrane protein. Cytoplasmic vesicle membrane; Single-pass type II membrane protein.	Ferlin family	C2 domains (5)
Q9NZN4	EHD2_HUMAN	EHD2_HUMAN	Q9NZN4	EHD2	EH domain-containing protein 2	Homo sapiens	X	X	1		M	cyto	nucl	plas,endo	membrane,endosome,cytoplasm,nucleus	coagulation,regulation of biological process,cell organization and biogenesis,metabolic process,cell death,response to stimulus,transport	catalytic activity,nucleotide binding,metal ion binding,protein binding	Cell membrane; Peripheral membrane protein; Cytoplasmic side. Endosome membrane; Peripheral membrane protein.		EF-hand domain (1); EH domain (1)
Q9P0K7-3		RAI14_HUMAN	Q9P0K7-3	RAI14	Isoform 3 of Ankycorbin	Homo sapiens		X	0		_	nucl	nucl	cyto,cyto	membrane,cytoplasm,extracellular,mitochondrion,cytoskeleton	regulation of biological process,metabolic process,transport	nucleotide binding,structural molecule activity,protein binding	Cytoplasm > cell cortex. Cytoplasm > cytoskeleton.		ANK repeats (7)
Q9P0M6		H2AW_HUMAN	Q9P0M6	H2AFY2	Core histone macro-H2A.2	Homo sapiens		X	1		M	mito	nucl	nucl,nucl	nucleus,organelle lumen,chromosome	defense response,regulation of biological process,cell differentiation,development,cell organization and biogenesis,metabolic process,response to stimulus	catalytic activity,DNA binding,protein binding	Nucleus. Chromosome.		Histone H2A domain (1); Macro domain (1)
Q9P243-3	ZFAT_HUMAN		Q9P243-3	ZFAT	Isoform 3 of Zinc finger protein ZFAT	Homo sapiens	X		0		_	nucl	nucl	nucl,cyto	membrane,cytoplasm,nucleus,endoplasmic reticulum,cytosol	regulation of biological process,metabolic process,response to stimulus,transport	DNA binding,metal ion binding,transporter activity	Nucleus. Cytoplasm > cytosol.		C2H2-type zinc fingers (19)
Q9P2E9-3	RRBP1_HUMAN	RRBP1_HUMAN	Q9P2E9-3	RRBP1	Isoform 2 of Ribosome-binding protein 1	Homo sapiens	X	X	1		S	E.R.	cyto	E.R.	membrane,ribosome,cytoplasm,endoplasmic reticulum	regulation of biological process,metabolic process,transport	nucleotide binding,structural molecule activity,signal transducer activity,protein binding,receptor activity	Endoplasmic reticulum membrane; Single-pass type III membrane protein.
Q9UBG0	MRC2_HUMAN		Q9UBG0	MRC2	C-type mannose receptor 2	Homo sapiens	X		1	S	S	pero	plas	plas	membrane	cell organization and biogenesis,response to stimulus,transport	catalytic activity,signal transducer activity,metal ion binding,transporter activity,receptor activity	Membrane; Single-pass type I membrane protein.		C-type lectin domains (8); Fibronectin type-II domain (1); Ricin B-type lectin domain (1)
Q9UBM7	DHCR7_HUMAN		Q9UBM7	DHCR7	7-dehydrocholesterol reductase	Homo sapiens	X		7		_	plas	cyto	E.R.	membrane,cytoplasm,endoplasmic reticulum,nucleus	cell differentiation,regulation of biological process,development,metabolic process,cell proliferation	catalytic activity,protein binding	Endoplasmic reticulum membrane; Multi-pass membrane protein.	ERG4/ERG24 family		Steroid biosynthesis; cholesterol biosynthesis.
Q9UBS4	DJB11_HUMAN		Q9UBS4	DNAJB11	DnaJ homolog subfamily B member 11	Homo sapiens	X		0	S	S	extr	cyto	E.R.	membrane,cytoplasm,nucleus,endoplasmic reticulum,extracellular,organelle lumen	coagulation,regulation of biological process,cell organization and biogenesis,metabolic process,response to stimulus,transport	catalytic activity,nucleotide binding,metal ion binding,protein binding	Endoplasmic reticulum lumen.		J domain (1)
Q9UDY4		DNJB4_HUMAN	Q9UDY4	DNAJB4	DnaJ homolog subfamily B member 4	Homo sapiens		X	0		_	cyto	nucl	cyto,plas	membrane,cytoplasm	metabolic process,response to stimulus	catalytic activity,DNA binding,metal ion binding,protein binding	Cytoplasm. Cell membrane.		J domain (1)
Q9UG63		ABCF2_HUMAN	Q9UG63	ABCF2	ATP-binding cassette sub-family F member 2	Homo sapiens		X	0		_	nucl	cyto	-	membrane,cytoplasm,cytosol,extracellular,mitochondrion	metabolic process,response to stimulus,transport	catalytic activity,nucleotide binding,RNA binding,transporter activity		ABC transporter superfamily, ABCF family, EF3 subfamily	ABC transporter domains (2)
Q9UGI8-2	TES_HUMAN		Q9UGI8-2	TES	Isoform 2 of Testin	Homo sapiens	X		0		_	nucl	plas	cyto,plas	membrane,cytoplasm,nucleus,organelle lumen		metal ion binding	Cytoplasm. Cell junction > focal adhesion.	Prickle / espinas / testin family	LIM zinc-binding domains (3); PET domain (1)
Q9UH99		UN84B_HUMAN	Q9UH99	SUN2	SUN domain-containing protein 2	Homo sapiens		X	2		_	nucl	nucl	nucl,endo	membrane,endosome,cytoplasm,nucleus,chromosome	regulation of biological process,cellular component movement,cell organization and biogenesis,metabolic process,transport	DNA binding,transcription regulator activity,protein binding	Nucleus inner membrane; Single-pass type II membrane protein. Endosome membrane; Single-pass type II membrane protein.		SUN domain (1)
Q9UHB6-4	LIMA1_HUMAN	LIMA1_HUMAN	Q9UHB6-4	LIMA1	Isoform 4 of LIM domain and actin-binding protein 1	Homo sapiens	X	X	0		M	nucl	cyto	cyto,plas,cyto	membrane,cytoplasm,cytoskeleton	regulation of biological process,cell organization and biogenesis	metal ion binding,protein binding	Cytoplasm. Cell junction > focal adhesion. Cytoplasm > cytoskeleton.		LIM zinc-binding domain (1)
Q9UHD8-9	SEPT9_HUMAN	SEPT9_HUMAN	Q9UHD8-9		Isoform 9 of Septin-9	Homo sapiens	X	X	0	S	M	nucl	cyto	cyto			catalytic activity,nucleotide binding	Cytoplasm > cytoskeleton.	Septin family
Q9UHD9	UBQL2_HUMAN	UBQL2_HUMAN	Q9UHD9	UBQLN2	Ubiquilin-2	Homo sapiens	X	X	1		_	cyto_nucl	nucl	cyto,nucl	membrane,cytoplasm,nucleus	metabolic process	catalytic activity,protein binding	Cytoplasm. Nucleus.		UBA domain (1); Ubiquitin-like domain (1)
Q9UHQ9	NB5R1_HUMAN		Q9UHQ9	CYB5R1	NADH-cytochrome b5 reductase 1	Homo sapiens	X		0	S	S	extr	-	plas	membrane,cytoplasm,nucleus,mitochondrion,organelle lumen	metabolic process,transport	catalytic activity,nucleotide binding,metal ion binding	Membrane; Single-pass membrane protein.	Flavoprotein pyridine nucleotide cytochrome reductase family	FAD-binding FR-type domain (1)
Q9UIG0-2	BAZ1B_HUMAN		Q9UIG0-2	BAZ1B	Isoform 2 of Tyrosine-protein kinase BAZ1B	Homo sapiens	X		1		_	nucl	nucl	nucl	membrane,nucleus,chromosome	regulation of biological process,development,cell organization and biogenesis,metabolic process,response to stimulus,transport	catalytic activity,nucleotide binding,transcription regulator activity,structural molecule activity,signal transducer activity,metal ion binding,protein binding,transporter activity	Nucleus.	WAL family, BAZ1B subfamily	Bromo domain (1); DDT domain (1); PHD-type zinc finger (1); WAC domain (1)
Q9UIJ7	KAD3_HUMAN		Q9UIJ7	AK3	GTP:AMP phosphotransferase, mitochondrial	Homo sapiens	X		0		M	mito	cyto	mito	cytoplasm,extracellular,mitochondrion,organelle lumen	coagulation,metabolic process,response to stimulus	catalytic activity,nucleotide binding,protein binding	Mitochondrion matrix.	Adenylate kinase family
Q9UJ98-2	STAG3_HUMAN		Q9UJ98-2	STAG3	Isoform 2 of Cohesin subunit SA-3	Homo sapiens	X		2		M	plas	nucl	nucl,nucl,nucl	nucleus,chromosome	cell organization and biogenesis	signal transducer activity,receptor activity	Nucleus. Chromosome. Chromosome > centromere.	SCC3 family	SCD (stromalin conservative) domain (1)
Q9UJZ1	STML2_HUMAN		Q9UJZ1	STOML2	Stomatin-like protein 2	Homo sapiens	X		0		M	mito	plas	plas,cyto,cyto	membrane,cytoplasm,mitochondrion,cytoskeleton	reproduction,metabolic process,transport	catalytic activity,signal transducer activity,protein binding,transporter activity	Membrane; Peripheral membrane protein. Cytoplasm. Cytoplasm > cytoskeleton.	Band 7/mec-2 family
Q9UK76-3	HN1_HUMAN		Q9UK76-3	HN1	Isoform 3 of Hematological and neurological expressed 1 protein	Homo sapiens	X		0		_	nucl	nucl	nucl	nucleus			Nucleus.	HN1 family
Q9UKM9-2		RALY_HUMAN	Q9UKM9-2	RALY	Isoform 1 of RNA-binding protein Raly	Homo sapiens		X	0		_	nucl	nucl	nucl	spliceosomal complex,nucleus	metabolic process	nucleotide binding,RNA binding	Nucleus.	RRM HNRPC family, RALY subfamily	RRM (RNA recognition motif) domain (1)
Q9UKV3-3		ACINU_HUMAN	Q9UKV3-3	ACIN1	Isoform 3 of Apoptotic chromatin condensation inducer in the nucleus	Homo sapiens		X	0		_	nucl	nucl	nucl	cytoplasm,cytosol,nucleus,organelle lumen	cell differentiation,regulation of biological process,development,cell organization and biogenesis,metabolic process,cell death	catalytic activity,nucleotide binding,DNA binding,protein binding	Nucleus.		SAP domain (1)
Q9UKX2	MYH2_HUMAN	MYH2_HUMAN	Q9UKX2	MYH2	Myosin-2	Homo sapiens	X	X	0		_	cyto	cyto	cyto	membrane,Golgi,cytoplasm,nucleus,organelle lumen,cytoskeleton	development,cell organization and biogenesis,metabolic process,response to stimulus,transport	catalytic activity,nucleotide binding,structural molecule activity,protein binding,motor activity	Cytoplasm > myofibril.		IQ domain (1); Myosin head-like domain (1)
Q9UKX3	MYH13_HUMAN		Q9UKX3	MYH13	Myosin-13	Homo sapiens	X		0		_	cyto	cyto	cyto	membrane,cytoplasm,nucleus,cytoskeleton	regulation of biological process,cell organization and biogenesis,metabolic process,transport	catalytic activity,nucleotide binding,DNA binding,transcription regulator activity,structural molecule activity,protein binding,motor activity	Cytoplasm > myofibril.		IQ domain (1); Myosin head-like domain (1)
Q9UKY7-2	CDV3_HUMAN		Q9UKY7-2	CDV3	Isoform 2 of Protein CDV3 homolog	Homo sapiens	X		0		_	nucl	-	cyto	cytoplasm	cell proliferation		Cytoplasm.	CDV3 family
Q9ULV4		COR1C_HUMAN	Q9ULV4	CORO1C	Coronin-1C	Homo sapiens		X	1		M	plas	cyto	-	membrane,cytoplasm,cytoskeleton	regulation of biological process,cell organization and biogenesis,metabolic process,transport,cell communication	catalytic activity,metal ion binding,protein binding		WD repeat coronin family	WD repeats (4)
Q9UM22-2	EPDR1_HUMAN		Q9UM22-2	EPDR1	Isoform 2 of Mammalian ependymin-related protein 1	Homo sapiens	X		0	S	S	extr	nucl	extr	cytoplasm,extracellular,vacuole		metal ion binding	Secreted.	Ependymin family
Q9UM54-5		MYO6_HUMAN	Q9UM54-5	MYO6	Isoform 5 of Myosin-VI	Homo sapiens		X	2		_	cyto	cyto	golg,golg,nucl,cyto,plas,plas,cyve,cyve,plas	membrane,Golgi,cytoplasm,nucleus,cytosol,organelle lumen,cytoskeleton	cell differentiation,regulation of biological process,development,cell organization and biogenesis,metabolic process,response to stimulus,transport,cell communication	catalytic activity,nucleotide binding,protein binding,motor activity	Golgi apparatus > trans-Golgi network membrane; Peripheral membrane protein. Golgi apparatus. Nucleus. Cytoplasm > perinuclear region. Membrane > clathrin-coated pit. Cell projection > ruffle membrane; Peripheral membrane protein. Cytoplasmic vesicle > clathrin-coated vesicle membrane. Cytoplasmic vesicle > clathrin-coated vesicle membrane. Cell projection > ruffle membrane.		IQ domain (1); Myosin head-like domain (1)
Q9UMS4		PRP19_HUMAN	Q9UMS4	PRPF19	Pre-mRNA-processing factor 19	Homo sapiens		X	0		_	cyto	nucl	nucl,nucl,cyto	spliceosomal complex,cytoplasm,nucleus,organelle lumen,cytoskeleton	regulation of biological process,cell differentiation,development,cell organization and biogenesis,cell proliferation,metabolic process,response to stimulus	catalytic activity,nucleotide binding,DNA binding,metal ion binding,protein binding,RNA binding	Nucleus. Nucleus > nucleoplasm. Cytoplasm > cytoskeleton > spindle.	WD repeat PRP19 family	U-box domain (1); WD repeats (7)
Q9UMS6	SYNP2_HUMAN	SYNP2_HUMAN	Q9UMS6	SYNPO2	Synaptopodin-2	Homo sapiens	X	X	0		_	nucl	cyto	nucl,cyto	cytoplasm,nucleus,cytoskeleton	regulation of biological process,metabolic process	catalytic activity,DNA binding,nucleotide binding,protein binding	Nucleus. Cytoplasm.	Synaptopodin family	PDZ (DHR) domain (1)
Q9UN86-2		G3BP2_HUMAN	Q9UN86-2	G3BP2	Isoform B of Ras GTPase-activating protein-binding protein 2	Homo sapiens		X	0		_	cyto	nucl	cyto	cytoplasm,cytosol	regulation of biological process,metabolic process,transport,cell communication	nucleotide binding,structural molecule activity,protein binding,enzyme regulator activity,RNA binding,transporter activity	Cytoplasm.		NTF2 domain (1); RRM (RNA recognition motif) domain (1)
Q9UNA0		ATS5_HUMAN	Q9UNA0	ADAMTS5	A disintegrin and metalloproteinase with thrombospondin motifs 5	Homo sapiens		X	0	S	S	extr	extr	extr	membrane,cytoplasm,nucleus,extracellular	metabolic process	catalytic activity,metal ion binding,signal transducer activity,protein binding	Secreted > extracellular space > extracellular matrix.		Disintegrin domain (1); Peptidase M12B domain (1); TSP type-1 domains (2)
Q9UNM6		PSD13_HUMAN	Q9UNM6	PSMD13	26S proteasome non-ATPase regulatory subunit 13	Homo sapiens		X	1		_	cyto	cyto	-	proteasome,cytoplasm,cytosol	regulation of biological process,metabolic process,cell death,response to stimulus	protein binding		Proteasome subunit S11 family	PCI domain (1)
Q9UP95-4	S12A4_HUMAN		Q9UP95-4	SLC12A4	Isoform 4 of Solute carrier family 12 member 4	Homo sapiens	X		9		_	plas	plas	plas	membrane	regulation of biological process,cellular homeostasis,transport	metal ion binding,transporter activity	Membrane; Multi-pass membrane protein.	SLC12A transporter family
Q9UPT8		CS007_HUMAN	Q9UPT8	ZC3H4	Zinc finger CCCH domain-containing protein 4	Homo sapiens		X	0		_	nucl	-	-	cytoskeleton		structural molecule activity,metal ion binding			C3H1-type zinc fingers (3)
Q9UQ35-3		SRRM2_HUMAN	Q9UQ35-3	SRRM2	Isoform 3 of Serine/arginine repetitive matrix protein 2	Homo sapiens		X	0		_	nucl	nucl	nucl	spliceosomal complex,nucleus,organelle lumen,chromosome	cell organization and biogenesis,metabolic process	DNA binding,protein binding,RNA binding	Nucleus speckle.	CWC21 family
Q9UQ80		PA2G4_HUMAN	Q9UQ80	PA2G4	Proliferation-associated protein 2G4	Homo sapiens		X	1		_	nucl	nucl	cyto,nucl	membrane,cytoplasm,nucleus,cytosol,extracellular,organelle lumen,cell surface	defense response,coagulation,regulation of biological process,reproduction,cell organization and biogenesis,metabolic process,cell proliferation,cell death,response to stimulus,cell communication	catalytic activity,transcription regulator activity,DNA binding,metal ion binding,protein binding,enzyme regulator activity,RNA binding	Cytoplasm. Nucleus > nucleolus.	Peptidase M24 family
Q9UQM7-2		KCC2A_HUMAN	Q9UQM7-2	CAMK2A	Isoform B of Calcium/calmodulin-dependent protein kinase type II subunit alpha	Homo sapiens		X	1		_	cyto	cyto	plas,plas	membrane,cytoplasm,nucleus,cytosol,organelle lumen	regulation of biological process,metabolic process,transport,cell communication	catalytic activity,nucleotide binding,protein binding	Cell junction > synapse > presynaptic cell membrane. Cell junction > synapse.	Protein kinase superfamily, CAMK Ser/Thr protein kinase family, CaMK subfamily	Protein kinase domain (1)
Q9Y277-2	VDAC3_HUMAN		Q9Y277-2	VDAC3	Isoform 2 of Voltage-dependent anion-selective channel protein 3	Homo sapiens	X		1		_	cyto	cyto	mito	membrane,cytoplasm,mitochondrion	defense response,regulation of biological process,response to stimulus,transport,cell communication	nucleotide binding,protein binding,transporter activity	Mitochondrion outer membrane.	Eukaryotic mitochondrial porin family
Q9Y281-1		COF2_HUMAN	Q9Y281-1	CFL2	Cofilin-2	Homo sapiens		X	0		_	mito	nucl	nucl,cyto	membrane,cytoplasm,nucleus,extracellular,organelle lumen,cytoskeleton	metabolic process	catalytic activity,nucleotide binding,protein binding	Nucleus matrix. Cytoplasm > cytoskeleton.	Actin-binding proteins ADF family	ADF-H domain (1)
Q9Y2D5-7	AKAP2_HUMAN	AKAP2_HUMAN	Q9Y2D5-7	AKAP2	Isoform 5 of A-kinase anchor protein 2	Homo sapiens	X	X	0		_	nucl	cyto	-			protein binding
Q9Y2W1		TR150_HUMAN	Q9Y2W1	THRAP3	Thyroid hormone receptor-associated protein 3	Homo sapiens		X	0		_	nucl	nucl	nucl	nucleus,extracellular,organelle lumen	regulation of biological process,cell differentiation,cell organization and biogenesis,metabolic process,cell death,cell communication	transcription regulator activity,nucleotide binding,signal transducer activity,protein binding,receptor activity	Nucleus.
Q9Y2W2		WBP11_HUMAN	Q9Y2W2	WBP11	WW domain-binding protein 11	Homo sapiens		X	0		_	nucl	nucl	nucl,cyto	membrane,cytoplasm,nucleus,extracellular,organelle lumen,cytoskeleton	regulation of biological process,cell differentiation,development,cell organization and biogenesis,metabolic process,cell death,transport,cell communication	catalytic activity,nucleotide binding,DNA binding,structural molecule activity,signal transducer activity,protein binding,enzyme regulator activity,motor activity,transporter activity,receptor activity	Nucleus. Cytoplasm.
Q9Y2X3		NOP5_HUMAN	Q9Y2X3	NOP58	Nucleolar protein 58	Homo sapiens		X	1		_	cyto	nucl	nucl	cytoplasm,nucleus,mitochondrion,organelle lumen	regulation of biological process,development,cell organization and biogenesis,cell growth,metabolic process,cell death,transport	catalytic activity,nucleotide binding,protein binding,RNA binding	Nucleus > nucleolus.	NOP5/NOP56 family	Nop domain (1)
Q9Y333		LSM2_HUMAN	Q9Y333	LSM2	U6 snRNA-associated Sm-like protein LSm2	Homo sapiens		X	0		_	cyto	nucl	nucl	spliceosomal complex,cytoplasm,nucleus,cytosol,organelle lumen	metabolic process	protein binding,RNA binding	Nucleus.	SnRNP Sm proteins family
Q9Y383-2		LC7L2_HUMAN	Q9Y383-2	LUC7L2	Isoform 2 of Putative RNA-binding protein Luc7-like 2	Homo sapiens		X	0		_	nucl	-	-			metal ion binding,protein binding		Luc7 family	C2H2-type zinc finger (1)
Q9Y3C6		PPIL1_HUMAN	Q9Y3C6	PPIL1	Peptidyl-prolyl cis-trans isomerase-like 1	Homo sapiens		X	0		_	cyto	plas	-	spliceosomal complex,membrane,cytoplasm,nucleus	metabolic process,transport	catalytic activity,protein binding,transporter activity		Cyclophilin-type PPIase family, PPIL1 subfamily	PPIase cyclophilin-type domain (1)
Q9Y3U8	RL36_HUMAN		Q9Y3U8	RPL36	60S ribosomal protein L36	Homo sapiens	X		0		_	nucl	cyto	-	ribosome,cytoplasm,cytosol,nucleus,organelle lumen	regulation of biological process,reproduction,development,cell organization and biogenesis,metabolic process,response to stimulus,cell communication	translation regulator activity,catalytic activity,nucleotide binding,structural molecule activity,metal ion binding,protein binding,RNA binding		Ribosomal protein L36e family
Q9Y3Y2-3		CA077_HUMAN	Q9Y3Y2-3	C1orf77	Isoform 2 of Friend of PRMT1 protein	Homo sapiens		X	0		_	mito	nucl	nucl,nucl	nucleus,organelle lumen	regulation of biological process,metabolic process	protein binding,RNA binding	Nucleus. Nucleus > nucleolus.
Q9Y490	TLN1_HUMAN	TLN1_HUMAN	Q9Y490	TLN1	Talin-1	Homo sapiens	X	X	3		_	cyto_nucl	plas	plas,cyto	membrane,cytoplasm,cytosol,nucleus,extracellular,cytoskeleton,chromosome	coagulation,cell differentiation,cellular component movement,development,cell organization and biogenesis,metabolic process,response to stimulus,transport	catalytic activity,DNA binding,nucleotide binding,structural molecule activity,metal ion binding,protein binding	Cell projection > ruffle membrane; Peripheral membrane protein; Cytoplasmic side. Cytoplasm > cytoskeleton.		FERM domain (1); I/LWEQ domain (1)
Q9Y4F1-2		FARP1_HUMAN	Q9Y4F1-2	FARP1	Isoform 2 of FERM, RhoGEF and pleckstrin domain-containing protein 1	Homo sapiens		X	1		_	nucl	-	-	membrane,cytoplasm,cytosol,cytoskeleton	regulation of biological process,metabolic process,cell communication	catalytic activity,protein binding,enzyme regulator activity			DH (DBL-homology) domain (1); FERM domain (1); PH domains (2)
Q9Y4J8-8		DTNA_HUMAN	Q9Y4J8-8	DTNA	Isoform 8 of Dystrobrevin alpha	Homo sapiens		X	0		_	cyto_nucl	plas	cyto,plas,plas	membrane,cytoplasm,nucleus	regulation of biological process,metabolic process,cell communication	transcription regulator activity,DNA binding,metal ion binding,protein binding	Cytoplasm. Cell junction > synapse. Cell membrane.	Dystrophin family, Dystrobrevin subfamily	ZZ-type zinc finger (1)
Q9Y4K0	LOXL2_HUMAN	LOXL2_HUMAN	Q9Y4K0	LOXL2	Lysyl oxidase homolog 2	Homo sapiens	X	X	0	S	S	extr	extr	extr	membrane,extracellular	development,metabolic process	catalytic activity,signal transducer activity,metal ion binding,receptor activity	Secreted > extracellular space.	Lysyl oxidase family	SRCR domains (4)
Q9Y4L1	HYOU1_HUMAN	OXRP_HUMAN	Q9Y4L1	HYOU1	Hypoxia up-regulated protein 1	Homo sapiens	X	X	0	S	S	E.R.	cyto	E.R.	membrane,cytoplasm,endoplasmic reticulum,nucleus,extracellular,mitochondrion,organelle lumen	regulation of biological process,cell organization and biogenesis,metabolic process,response to stimulus	catalytic activity,transcription regulator activity,nucleotide binding,DNA binding,structural molecule activity,metal ion binding,protein binding	Endoplasmic reticulum lumen.	Heat shock protein 70 family
Q9Y570-3	PPME1_HUMAN	PPME1_HUMAN	Q9Y570-3	PPME1	Isoform 3 of Protein phosphatase methylesterase 1	Homo sapiens	X	X	1		_	nucl	-	-		metabolic process	catalytic activity,protein binding,enzyme regulator activity		AB hydrolase superfamily
Q9Y5J1		UTP18_HUMAN	Q9Y5J1	UTP18	U3 small nucleolar RNA-associated protein 18 homolog	Homo sapiens		X	1		_	nucl	nucl	nucl	cytoplasm,nucleus,extracellular,organelle lumen	defense response,regulation of biological process,cell organization and biogenesis,cell proliferation,metabolic process,response to stimulus	catalytic activity,DNA binding,metal ion binding,protein binding,enzyme regulator activity,RNA binding	Nucleus > nucleolus.	WD repeat UTP18 family	WD repeats (6)
Q9Y5S2	MRCKB_HUMAN		Q9Y5S2	CDC42BPB	Serine/threonine-protein kinase MRCK beta	Homo sapiens	X		2		_	nucl	cyto	cyto	membrane,cytoplasm,nucleus,extracellular,chromosome,cytoskeleton	regulation of biological process,cell differentiation,development,cellular component movement,cell organization and biogenesis,metabolic process,response to stimulus,transport,cell communication	catalytic activity,nucleotide binding,transcription regulator activity,structural molecule activity,metal ion binding,protein binding,enzyme regulator activity,motor activity,transporter activity	Cytoplasm.	Protein kinase superfamily, AGC Ser/Thr protein kinase family, DMPK subfamily	AGC-kinase C-terminal domain (1); CNH domain (1); CRIB domain (1); PH domain (1); Phorbol-ester/DAG-type zinc finger (1); Protein kinase domain (1)
Q9Y623	MYH4_HUMAN		Q9Y623	MYH4	Myosin-4	Homo sapiens	X		0		_	cyto	plas	cyto	membrane,cytoplasm,cytoskeleton	cell organization and biogenesis,metabolic process,response to stimulus,transport	catalytic activity,nucleotide binding,structural molecule activity,protein binding,motor activity	Cytoplasm > myofibril.		IQ domain (1); Myosin head-like domain (1)
Q9Y678	COPG_HUMAN		Q9Y678	COPG	Coatomer subunit gamma	Homo sapiens	X		0		_	cyto	cyto	cyto,golg,cyve	membrane,Golgi,cytoplasm,cytosol,endoplasmic reticulum,extracellular	regulation of biological process,cell organization and biogenesis,metabolic process,transport	catalytic activity,transcription regulator activity,nucleotide binding,structural molecule activity,metal ion binding,protein binding,enzyme regulator activity,transporter activity	Cytoplasm. Golgi apparatus membrane; Peripheral membrane protein; Cytoplasmic side. Cytoplasmic vesicle > COPI-coated vesicle membrane; Peripheral membrane protein; Cytoplasmic side.	COPG family	HEAT repeats (4)
Q9Y696		CLIC4_HUMAN	Q9Y696	CLIC4	Chloride intracellular channel protein 4	Homo sapiens		X	1		_	cyto	plas	cyto,cyve,nucl,plas,mito,plas	membrane,cytoplasm,nucleus,cytosol,mitochondrion,organelle lumen,cytoskeleton,cell surface	regulation of biological process,cell differentiation,cellular component movement,development,cell organization and biogenesis,response to stimulus,transport	protein binding,transporter activity	Cytoplasm > cytoskeleton > centrosome. Cytoplasmic vesicle membrane; Single-pass membrane protein. Nucleus matrix. Cell membrane; Single-pass membrane protein. Mitochondrion. Cell junction.	Chloride channel CLIC family	GST C-terminal domain (1)
Q9Y6C2		EMIL1_HUMAN	Q9Y6C2	EMILIN1	EMILIN-1	Homo sapiens		X	1	S	S	extr	extr	extr	cytoplasm,nucleus,cytosol,extracellular,organelle lumen,cytoskeleton	regulation of biological process,cell organization and biogenesis,metabolic process,transport	catalytic activity,structural molecule activity,protein binding,RNA binding	Secreted > extracellular space > extracellular matrix.		C1q domain (1); Collagen-like domain (1); EMI domain (1)
Q9Y6C9	MTCH2_HUMAN		Q9Y6C9	MTCH2	Mitochondrial carrier homolog 2	Homo sapiens	X		2		S	extr	cyto	mito	membrane,cytoplasm,mitochondrion	transport	catalytic activity,metal ion binding	Mitochondrion inner membrane; Multi-pass membrane protein.	Mitochondrial carrier family	Solcar repeats (2)

## Sheet: IPA_Loc
IPA_Loc (5 categories)	Total Proteins (883)	%age	Total Extract M047_Count (518)	%age	Nucleus M047_Count (648)	%age
plas	103	11.6648	73	14.0927	61	9.41358
cyto	436	49.3771	299	57.722	294	45.3704
nucl	266	30.1246	96	18.5328	244	37.6543
EC	38	4.30351	22	4.2471	29	4.47531
unknown	40	4.53001	28	5.40541	20	3.08642
Total	883	100	518	100	648	100
