# Supplementary material for: FSHD Myotubes with Different Phenotypes Exhibit Distinct Proteomes
Source: PLoS One. 2012 Dec 18;7(12):e51865. doi: 10.1371/journal.pone.0051865 (PMC3525578; doi:10.1371/journal.pone.0051865)
Supplement: Table S7 — Raw data: analysis #aFSHD3_TE. (XLSX) [file pone.0051865.s011.xlsx]

## Sheet: aFSHD3_TE
Accession	Score	Mass	H/L	SD(geo)	#	T.Test	Description
O15511|ARPC5_HUMAN	53	16367.8	P		0		Actin-related protein 2/3 complex subunit 5 OS=Homo sapiens GN=ARPC5 PE=1 SV=3
O60506|HNRPQ_HUMAN	51	69788.2	P		0		Heterogeneous nuclear ribonucleoprotein Q OS=Homo sapiens GN=SYNCRIP PE=1 SV=2
O75369|FLNB_HUMAN	53	280157	P		0		Filamin-B OS=Homo sapiens GN=FLNB PE=1 SV=2
O94925|GLSK_HUMAN	92	74269.7	P		0		Glutaminase kidney isoform, mitochondrial OS=Homo sapiens GN=GLS PE=1 SV=1
P00387|NB5R3_HUMAN	94	34441.3	P		0		NADH-cytochrome b5 reductase 3 OS=Homo sapiens GN=CYB5R3 PE=1 SV=3
P00488|F13A_HUMAN	64	83728.3	P		0		Coagulation factor XIII A chain OS=Homo sapiens GN=F13A1 PE=1 SV=4
P01584|IL1B_HUMAN	44	31013.5	P		0		Interleukin-1 beta OS=Homo sapiens GN=IL1B PE=1 SV=2
P02794|FRIH_HUMAN	44	21383.9	P		0		Ferritin heavy chain OS=Homo sapiens GN=FTH1 PE=1 SV=2
P04844|RPN2_HUMAN	50	69355.5	P		0		Dolichyl-diphosphooligosaccharide--protein glycosyltransferase subunit 2 OS=Homo sapiens GN=RPN2 PE=1 SV=3
P07437|TBB5_HUMAN	278	50095.6	P		0		Tubulin beta chain OS=Homo sapiens GN=TUBB PE=1 SV=2
P07858|CATB_HUMAN	141	38766.7	P		0		Cathepsin B OS=Homo sapiens GN=CTSB PE=1 SV=3
P08138|TNR16_HUMAN	64	46751.4	P		0		Tumor necrosis factor receptor superfamily member 16 OS=Homo sapiens GN=NGFR PE=1 SV=1
P08195|4F2_HUMAN	44	68180.3	P		0		4F2 cell-surface antigen heavy chain OS=Homo sapiens GN=SLC3A2 PE=1 SV=3
P08758|ANXA5_HUMAN	62	35971.9	P		0		Annexin A5 OS=Homo sapiens GN=ANXA5 PE=1 SV=2
P09012|SNRPA_HUMAN	55	31259.7	P		0		U1 small nuclear ribonucleoprotein A OS=Homo sapiens GN=SNRPA PE=1 SV=3
P09486|SPRC_HUMAN	46	35465.5	P		0		SPARC OS=Homo sapiens GN=SPARC PE=1 SV=1
P12107|COBA1_HUMAN	75	181581	P		0		Collagen alpha-1(XI) chain OS=Homo sapiens GN=COL11A1 PE=1 SV=4
P12882|MYH1_HUMAN	881	223976	P		0		Myosin-1 OS=Homo sapiens GN=MYH1 PE=1 SV=3
P12956|XRCC6_HUMAN	61	70084.7	P		0		X-ray repair cross-complementing protein 6 OS=Homo sapiens GN=XRCC6 PE=1 SV=2
P13639|EF2_HUMAN	58	96246.8	P		0		Elongation factor 2 OS=Homo sapiens GN=EEF2 PE=1 SV=4
P18206|VINC_HUMAN	66	124293	P		0		Vinculin OS=Homo sapiens GN=VCL PE=1 SV=4
P19338|NUCL_HUMAN	49	76625.9	P		0		Nucleolin OS=Homo sapiens GN=NCL PE=1 SV=3
P20908|CO5A1_HUMAN	42	184132	P		0		Collagen alpha-1(V) chain OS=Homo sapiens GN=COL5A1 PE=1 SV=3
P21796|VDAC1_HUMAN	105	30868.1	P		0		Voltage-dependent anion-selective channel protein 1 OS=Homo sapiens GN=VDAC1 PE=1 SV=2
P22087|FBRL_HUMAN	58	33878	P		0		rRNA 2'-O-methyltransferase fibrillarin OS=Homo sapiens GN=FBL PE=1 SV=2
P23634|AT2B4_HUMAN	53	139031	P		0		Plasma membrane calcium-transporting ATPase 4 OS=Homo sapiens GN=ATP2B4 PE=1 SV=2
P27348|1433T_HUMAN	53	28032.4	P		0		14-3-3 protein theta OS=Homo sapiens GN=YWHAQ PE=1 SV=1
P28799|GRN_HUMAN	74	68518.2	P		0		Granulins OS=Homo sapiens GN=GRN PE=1 SV=2
P30048|PRDX3_HUMAN	55	28017.8	P		0		Thioredoxin-dependent peroxide reductase, mitochondrial OS=Homo sapiens GN=PRDX3 PE=1 SV=3
P30050|RL12_HUMAN	63	17979.1	P		0		60S ribosomal protein L12 OS=Homo sapiens GN=RPL12 PE=1 SV=1
P30837|AL1B1_HUMAN	78	57626.9	P		0		Aldehyde dehydrogenase X, mitochondrial OS=Homo sapiens GN=ALDH1B1 PE=1 SV=3
P35232|PHB_HUMAN	89	29843.4	P		0		Prohibitin OS=Homo sapiens GN=PHB PE=1 SV=1
P35749|MYH11_HUMAN	375	228055	P		0		Myosin-11 OS=Homo sapiens GN=MYH11 PE=1 SV=3
P36542|ATPG_HUMAN	61	33032.8	P		0		ATP synthase subunit gamma, mitochondrial OS=Homo sapiens GN=ATP5C1 PE=1 SV=1
P38159|HNRPG_HUMAN	78	42306.8	P		0		Heterogeneous nuclear ribonucleoprotein G OS=Homo sapiens GN=RBMX PE=1 SV=3
P40939|ECHA_HUMAN	79	83688.6	P		0		Trifunctional enzyme subunit alpha, mitochondrial OS=Homo sapiens GN=HADHA PE=1 SV=2
P45974|UBP5_HUMAN	52	96638.2	P		0		Ubiquitin carboxyl-terminal hydrolase 5 OS=Homo sapiens GN=USP5 PE=1 SV=2
P50895|BCAM_HUMAN	46	68161.4	P		0		Basal cell adhesion molecule OS=Homo sapiens GN=BCAM PE=1 SV=2
P55084|ECHB_HUMAN	57	51547.1	P		0		Trifunctional enzyme subunit beta, mitochondrial OS=Homo sapiens GN=HADHB PE=1 SV=3
P60174|TPIS_HUMAN	97	26938.3	P		0		Triosephosphate isomerase OS=Homo sapiens GN=TPI1 PE=1 SV=2
P60903|S10AA_HUMAN	50	11310	P		0		Protein S100-A10 OS=Homo sapiens GN=S100A10 PE=1 SV=2
P61604|CH10_HUMAN	82	10925.4	P		0		10 kDa heat shock protein, mitochondrial OS=Homo sapiens GN=HSPE1 PE=1 SV=2
P61916|NPC2_HUMAN	48	16902.1	P		0		Epididymal secretory protein E1 OS=Homo sapiens GN=NPC2 PE=1 SV=1
P62081|RS7_HUMAN	46	22113.8	P		0		40S ribosomal protein S7 OS=Homo sapiens GN=RPS7 PE=1 SV=1
P62249|RS16_HUMAN	71	16549.6	P		0		40S ribosomal protein S16 OS=Homo sapiens GN=RPS16 PE=1 SV=2
P62277|RS13_HUMAN	55	17212.2	P		0		40S ribosomal protein S13 OS=Homo sapiens GN=RPS13 PE=1 SV=2
P62318|SMD3_HUMAN	97	14021.9	P		0		Small nuclear ribonucleoprotein Sm D3 OS=Homo sapiens GN=SNRPD3 PE=1 SV=1
P62753|RS6_HUMAN	63	28834.5	P		0		40S ribosomal protein S6 OS=Homo sapiens GN=RPS6 PE=1 SV=1
P62913|RL11_HUMAN	60	20468.2	P		0		60S ribosomal protein L11 OS=Homo sapiens GN=RPL11 PE=1 SV=2
Q01995|TAGL_HUMAN	54	22654	P		0		Transgelin OS=Homo sapiens GN=TAGLN PE=1 SV=4
Q02818|NUCB1_HUMAN	43	53846.8	P		0		Nucleobindin-1 OS=Homo sapiens GN=NUCB1 PE=1 SV=4
Q06830|PRDX1_HUMAN	61	22324.9	P		0		Peroxiredoxin-1 OS=Homo sapiens GN=PRDX1 PE=1 SV=1
Q08211|DHX9_HUMAN	71	142181	P		0		ATP-dependent RNA helicase A OS=Homo sapiens GN=DHX9 PE=1 SV=4
Q12905|ILF2_HUMAN	66	43263.8	P		0		Interleukin enhancer-binding factor 2 OS=Homo sapiens GN=ILF2 PE=1 SV=2
Q12906|ILF3_HUMAN	77	95678.7	P		0		Interleukin enhancer-binding factor 3 OS=Homo sapiens GN=ILF3 PE=1 SV=3
Q13507|TRPC3_HUMAN	44	98091	P		0		Short transient receptor potential channel 3 OS=Homo sapiens GN=TRPC3 PE=1 SV=2
Q14240|IF4A2_HUMAN	70	46601.4	P		0		Eukaryotic initiation factor 4A-II OS=Homo sapiens GN=EIF4A2 PE=1 SV=2
Q14533|KRT81_HUMAN	108	56832	P		0		Keratin, type II cuticular Hb1 OS=Homo sapiens GN=KRT81 PE=1 SV=3
Q15323|K1H1_HUMAN	70	48633.1	P		0		Keratin, type I cuticular Ha1 OS=Homo sapiens GN=KRT31 PE=1 SV=3
Q15417|CNN3_HUMAN	65	36562.3	P		0		Calponin-3 OS=Homo sapiens GN=CNN3 PE=1 SV=1
Q15717|ELAV1_HUMAN	59	36240.7	P		0		ELAV-like protein 1 OS=Homo sapiens GN=ELAVL1 PE=1 SV=2
Q16082|HSPB2_HUMAN	65	20277.7	P		0		Heat shock protein beta-2 OS=Homo sapiens GN=HSPB2 PE=1 SV=2
Q16527|CSRP2_HUMAN	49	21852.7	P		0		Cysteine and glycine-rich protein 2 OS=Homo sapiens GN=CSRP2 PE=1 SV=3
Q16822|PCKGM_HUMAN	58	71483.4	P		0		Phosphoenolpyruvate carboxykinase [GTP], mitochondrial OS=Homo sapiens GN=PCK2 PE=1 SV=3
Q5BKX8|MURC_HUMAN	53	41988.3	P		0		Muscle-related coiled-coil protein OS=Homo sapiens GN=MURC PE=1 SV=2
Q86TC9|MYPN_HUMAN	66	146707	P		0		Myopalladin OS=Homo sapiens GN=MYPN PE=1 SV=2
Q8IVT2|CS021_HUMAN	43	75482.5	P		0		Uncharacterized protein C19orf21 OS=Homo sapiens GN=C19orf21 PE=1 SV=1
Q8NHW5|RLA0L_HUMAN	74	34514.3	P		0		60S acidic ribosomal protein P0-like OS=Homo sapiens GN=RPLP0P6 PE=5 SV=1
Q8TD57|DYH3_HUMAN	42	473776	P		0		Dynein heavy chain 3, axonemal OS=Homo sapiens GN=DNAH3 PE=2 SV=1
Q92504|S39A7_HUMAN	58	50201.9	P		0		Zinc transporter SLC39A7 OS=Homo sapiens GN=SLC39A7 PE=1 SV=2
Q96IZ0|PAWR_HUMAN	55	36660	P		0		PRKC apoptosis WT1 regulator protein OS=Homo sapiens GN=PAWR PE=1 SV=1
Q99733|NP1L4_HUMAN	73	42968.4	P		0		Nucleosome assembly protein 1-like 4 OS=Homo sapiens GN=NAP1L4 PE=1 SV=1
Q9BQI7|PSD2_HUMAN	48	85391.8	P		0		PH and SEC7 domain-containing protein 2 OS=Homo sapiens GN=PSD2 PE=2 SV=2
Q9BUJ2|HNRL1_HUMAN	50	96250	P		0		Heterogeneous nuclear ribonucleoprotein U-like protein 1 OS=Homo sapiens GN=HNRNPUL1 PE=1 SV=2
Q9UHB6|LIMA1_HUMAN	97	85630	P		0		LIM domain and actin-binding protein 1 OS=Homo sapiens GN=LIMA1 PE=1 SV=1
Q9UHQ9|NB5R1_HUMAN	99	34244.8	P		0		NADH-cytochrome b5 reductase 1 OS=Homo sapiens GN=CYB5R1 PE=1 SV=1
Q9UKM9|RALY_HUMAN	46	32501.1	P		0		RNA-binding protein Raly OS=Homo sapiens GN=RALY PE=1 SV=1
Q9UKV3|ACINU_HUMAN	61	152170	P		0		Apoptotic chromatin condensation inducer in the nucleus OS=Homo sapiens GN=ACIN1 PE=1 SV=2
Q9ULV4|COR1C_HUMAN	69	53899.8	P		0		Coronin-1C OS=Homo sapiens GN=CORO1C PE=1 SV=1
P13535|MYH8_HUMAN	905	223594	0.507849	1.32217	5	*	Myosin-8 OS=Homo sapiens GN=MYH8 PE=1 SV=3
P11055|MYH3_HUMAN	1923	224850	0.526668	NN	20		Myosin-3 OS=Homo sapiens GN=MYH3 PE=1 SV=3
Q96A32|MLRS_HUMAN	215	19117	0.536575	1.16764	4	*	Myosin regulatory light chain 2, skeletal muscle isoform OS=Homo sapiens GN=MYLPF PE=2 SV=1
P05976|MYL1_HUMAN	120	21189.3	0.554443	1.71628	2		Myosin light chain 1/3, skeletal muscle isoform OS=Homo sapiens GN=MYL1 PE=1 SV=3
Q13203|MYBPH_HUMAN	46	52531.2	0.584858		1		Myosin-binding protein H OS=Homo sapiens GN=MYBPH PE=2 SV=4
P48735|IDHP_HUMAN	168	51333.5	0.696178	1.1282	4	*	Isocitrate dehydrogenase [NADP], mitochondrial OS=Homo sapiens GN=IDH2 PE=1 SV=2
P48681|NEST_HUMAN	2458	177789	0.718388	1.20243	50	*	Nestin OS=Homo sapiens GN=NES PE=1 SV=2
P26373|RL13_HUMAN	108	24304	0.721686		1		60S ribosomal protein L13 OS=Homo sapiens GN=RPL13 PE=1 SV=4
Q92973|TNPO1_HUMAN	63	103772	0.721846		1		Transportin-1 OS=Homo sapiens GN=TNPO1 PE=1 SV=2
Q12797|ASPH_HUMAN	47	86266.1	0.725523		1		Aspartyl/asparaginyl beta-hydroxylase OS=Homo sapiens GN=ASPH PE=1 SV=3
P62263|RS14_HUMAN	127	16434.1	0.738632	1.19675	3		40S ribosomal protein S14 OS=Homo sapiens GN=RPS14 PE=1 SV=3
Q8NC51|PAIRB_HUMAN	60	44996	0.74198		1		Plasminogen activator inhibitor 1 RNA-binding protein OS=Homo sapiens GN=SERBP1 PE=1 SV=2
Q13813|SPTA2_HUMAN	492	285163	0.742336	1.10635	9	*	Spectrin alpha chain, brain OS=Homo sapiens GN=SPTAN1 PE=1 SV=3
Q5BJD5|TM41B_HUMAN	45	32664	0.743974		1		Transmembrane protein 41B OS=Homo sapiens GN=TMEM41B PE=1 SV=1
P62851|RS25_HUMAN	49	13791.2	0.744571		1		40S ribosomal protein S25 OS=Homo sapiens GN=RPS25 PE=1 SV=1
P55072|TERA_HUMAN	57	89950.5	0.746558		1		Transitional endoplasmic reticulum ATPase OS=Homo sapiens GN=VCP PE=1 SV=4
P01892|1A02_HUMAN	86	41181.8	0.749669		1		HLA class I histocompatibility antigen, A-2 alpha chain OS=Homo sapiens GN=HLA-A PE=1 SV=1
P05534|1A24_HUMAN	91	40948.6	0.749669		1		HLA class I histocompatibility antigen, A-24 alpha chain OS=Homo sapiens GN=HLA-A PE=1 SV=2
Q702N8|XIRP1_HUMAN	415	199637	0.752957	1.19317	10	*	Xin actin-binding repeat-containing protein 1 OS=Homo sapiens GN=XIRP1 PE=1 SV=1
Q8WZ42|TITIN_HUMAN	179	3.84312e+06	0.755232	1.08373	4	*	Titin OS=Homo sapiens GN=TTN PE=1 SV=2
P12883|MYH7_HUMAN	666	223758	0.76724	1.21522	3		Myosin-7 OS=Homo sapiens GN=MYH7 PE=1 SV=5
Q01082|SPTB2_HUMAN	212	275237	0.77241	1.15653	6	*	Spectrin beta chain, brain 1 OS=Homo sapiens GN=SPTBN1 PE=1 SV=2
P45379|TNNT2_HUMAN	285	35902.4	0.772942	1.18789	5	*	Troponin T, cardiac muscle OS=Homo sapiens GN=TNNT2 PE=1 SV=3
O94875|SRBS2_HUMAN	54	125171	0.779955	1.20426	2		Sorbin and SH3 domain-containing protein 2 OS=Homo sapiens GN=SORBS2 PE=1 SV=3
P62314|SMD1_HUMAN	47	13273.9	0.785149		1		Small nuclear ribonucleoprotein Sm D1 OS=Homo sapiens GN=SNRPD1 PE=1 SV=1
Q6ZMU5|TRI72_HUMAN	172	53609.9	0.785196	1.13045	4	*	Tripartite motif-containing protein 72 OS=Homo sapiens GN=TRIM72 PE=1 SV=2
P46782|RS5_HUMAN	104	23033.6	0.788399		1		40S ribosomal protein S5 OS=Homo sapiens GN=RPS5 PE=1 SV=4
P26038|MOES_HUMAN	64	67892.3	0.801291		1		Moesin OS=Homo sapiens GN=MSN PE=1 SV=3
Q96AQ6|PBIP1_HUMAN	55	81050.7	0.801486		1		Pre-B-cell leukemia transcription factor-interacting protein 1 OS=Homo sapiens GN=PBXIP1 PE=1 SV=1
Q04941|PLP2_HUMAN	44	17022.3	0.807214		1		Proteolipid protein 2 OS=Homo sapiens GN=PLP2 PE=1 SV=1
P06748|NPM_HUMAN	242	32726.4	0.809363	1.20261	5		Nucleophosmin OS=Homo sapiens GN=NPM1 PE=1 SV=2
P19237|TNNI1_HUMAN	275	21850.1	0.810367	1.28421	8	*	Troponin I, slow skeletal muscle OS=Homo sapiens GN=TNNI1 PE=1 SV=3
Q9UMS6|SYNP2_HUMAN	331	118069	0.818595	1.30014	6		Synaptopodin-2 OS=Homo sapiens GN=SYNPO2 PE=1 SV=2
Q13283|G3BP1_HUMAN	95	52189.6	0.819908		1		Ras GTPase-activating protein-binding protein 1 OS=Homo sapiens GN=G3BP1 PE=1 SV=1
Q96MG2|JSPR1_HUMAN	64	36468.3	0.82106		1		Junctional sarcoplasmic reticulum protein 1 OS=Homo sapiens GN=JSRP1 PE=2 SV=1
P09651|ROA1_HUMAN	273	38837.6	0.82238	1.23693	4		Heterogeneous nuclear ribonucleoprotein A1 OS=Homo sapiens GN=HNRNPA1 PE=1 SV=5
P08238|HS90B_HUMAN	195	83554.7	0.82239	1.19715	3		Heat shock protein HSP 90-beta OS=Homo sapiens GN=HSP90AB1 PE=1 SV=4
Q8IY63|AMOL1_HUMAN	54	106851	0.826187		1		Angiomotin-like protein 1 OS=Homo sapiens GN=AMOTL1 PE=1 SV=1
P14649|MYL6B_HUMAN	359	22864.2	0.827318	1.08878	4	*	Myosin light chain 6B OS=Homo sapiens GN=MYL6B PE=1 SV=1
Q9P0L0|VAPA_HUMAN	77	28103.8	0.830801		1		Vesicle-associated membrane protein-associated protein A OS=Homo sapiens GN=VAPA PE=1 SV=3
P63316|TNNC1_HUMAN	93	18505.1	0.832947		1		Troponin C, slow skeletal and cardiac muscles OS=Homo sapiens GN=TNNC1 PE=1 SV=1
P06899|H2B1J_HUMAN	280	13896.1	0.837242	1.10837	4	*	Histone H2B type 1-J OS=Homo sapiens GN=HIST1H2BJ PE=1 SV=3
P45378|TNNT3_HUMAN	66	31805.9	0.839639		1		Troponin T, fast skeletal muscle OS=Homo sapiens GN=TNNT3 PE=1 SV=3
P01023|A2MG_HUMAN	82	164614	0.841817		1		Alpha-2-macroglobulin OS=Homo sapiens GN=A2M PE=1 SV=3
Q9NQC3|RTN4_HUMAN	391	130251	0.842574	1.29445	7		Reticulon-4 OS=Homo sapiens GN=RTN4 PE=1 SV=2
P07910|HNRPC_HUMAN	87	33707.1	0.844521	1.02922	3	*	Heterogeneous nuclear ribonucleoproteins C1/C2 OS=Homo sapiens GN=HNRNPC PE=1 SV=4
P62244|RS15A_HUMAN	69	14944.5	0.847108		1		40S ribosomal protein S15a OS=Homo sapiens GN=RPS15A PE=1 SV=2
P84243|H33_HUMAN	133	15376	0.855288	1.12649	5	*	Histone H3.3 OS=Homo sapiens GN=H3F3A PE=1 SV=2
P27635|RL10_HUMAN	48	25044.5	0.861176		1		60S ribosomal protein L10 OS=Homo sapiens GN=RPL10 PE=1 SV=4
P07900|HS90A_HUMAN	172	85006.3	0.862768	1.36534	2		Heat shock protein HSP 90-alpha OS=Homo sapiens GN=HSP90AA1 PE=1 SV=5
P31943|HNRH1_HUMAN	181	49484	0.865558	1.02847	3	*	Heterogeneous nuclear ribonucleoprotein H OS=Homo sapiens GN=HNRNPH1 PE=1 SV=4
P36578|RL4_HUMAN	110	47953	0.871373	1.04392	3	*	60S ribosomal protein L4 OS=Homo sapiens GN=RPL4 PE=1 SV=5
P02452|CO1A1_HUMAN	713	139883	0.877924	1.08485	10	*	Collagen alpha-1(I) chain OS=Homo sapiens GN=COL1A1 PE=1 SV=5
P23246|SFPQ_HUMAN	116	76216.2	0.880862	1.11522	2		Splicing factor, proline- and glutamine-rich OS=Homo sapiens GN=SFPQ PE=1 SV=2
P16104|H2AX_HUMAN	83	15135.9	0.883598	1.17526	3		Histone H2A.x OS=Homo sapiens GN=H2AFX PE=1 SV=2
P50402|EMD_HUMAN	57	29033.5	0.884324		1		Emerin OS=Homo sapiens GN=EMD PE=1 SV=1
P80723|BASP1_HUMAN	98	22680.5	0.885189	1.11708	2		Brain acid soluble protein 1 OS=Homo sapiens GN=BASP1 PE=1 SV=2
P17661|DESM_HUMAN	2561	53560.7	0.889389	1.12504	33	*	Desmin OS=Homo sapiens GN=DES PE=1 SV=3
P63000|RAC1_HUMAN	60	21835.9	0.895708		1		Ras-related C3 botulinum toxin substrate 1 OS=Homo sapiens GN=RAC1 PE=1 SV=1
Q8IUE6|H2A2B_HUMAN	95	13987.3	0.896157	1.16846	4		Histone H2A type 2-B OS=Homo sapiens GN=HIST2H2AB PE=1 SV=3
Q16186|ADRM1_HUMAN	71	42412.4	0.896466		1		Proteasomal ubiquitin receptor ADRM1 OS=Homo sapiens GN=ADRM1 PE=1 SV=2
P05386|RLA1_HUMAN	76	11621.2	0.900629		1		60S acidic ribosomal protein P1 OS=Homo sapiens GN=RPLP1 PE=1 SV=1
Q16643|DREB_HUMAN	186	71842.1	0.906601	1.22885	5		Drebrin OS=Homo sapiens GN=DBN1 PE=1 SV=4
Q92499|DDX1_HUMAN	77	83349.6	0.913465	1.3079	2		ATP-dependent RNA helicase DDX1 OS=Homo sapiens GN=DDX1 PE=1 SV=2
P52597|HNRPF_HUMAN	51	45985.5	0.913645	1.11494	2		Heterogeneous nuclear ribonucleoprotein F OS=Homo sapiens GN=HNRNPF PE=1 SV=3
P16401|H15_HUMAN	100	22567	0.914552	1.18881	4		Histone H1.5 OS=Homo sapiens GN=HIST1H1B PE=1 SV=3
P61247|RS3A_HUMAN	257	30154.3	0.915113	1.15934	6		40S ribosomal protein S3a OS=Homo sapiens GN=RPS3A PE=1 SV=2
Q01081|U2AF1_HUMAN	57	28368.2	0.91609		1		Splicing factor U2AF 35 kDa subunit OS=Homo sapiens GN=U2AF1 PE=1 SV=3
P13987|CD59_HUMAN	86	14795.5	0.926417		1		CD59 glycoprotein OS=Homo sapiens GN=CD59 PE=1 SV=1
P35609|ACTN2_HUMAN	802	104359	0.926876	1.28662	15		Alpha-actinin-2 OS=Homo sapiens GN=ACTN2 PE=1 SV=1
P02545|LMNA_HUMAN	1822	74380.3	0.931755	1.22858	34		Prelamin-A/C OS=Homo sapiens GN=LMNA PE=1 SV=1
P06576|ATPB_HUMAN	495	56525.1	0.932074	1.19129	10		ATP synthase subunit beta, mitochondrial OS=Homo sapiens GN=ATP5B PE=1 SV=3
P09382|LEG1_HUMAN	433	15048.8	0.932327	1.22326	6		Galectin-1 OS=Homo sapiens GN=LGALS1 PE=1 SV=2
P62158|CALM_HUMAN	104	16827.3	0.932409		1		Calmodulin OS=Homo sapiens GN=CALM1 PE=1 SV=2
P08865|RSSA_HUMAN	64	32948	0.933338		1		40S ribosomal protein SA OS=Homo sapiens GN=RPSA PE=1 SV=4
P50454|SERPH_HUMAN	579	46525.7	0.933511	1.2258	7		Serpin H1 OS=Homo sapiens GN=SERPINH1 PE=1 SV=2
P22695|QCR2_HUMAN	54	48584.4	0.936209		1		Cytochrome b-c1 complex subunit 2, mitochondrial OS=Homo sapiens GN=UQCRC2 PE=1 SV=3
P67809|YBOX1_HUMAN	121	35903.2	0.937384	1.14247	2		Nuclease-sensitive element-binding protein 1 OS=Homo sapiens GN=YBX1 PE=1 SV=3
P0C0S5|H2AZ_HUMAN	136	13545	0.938132	1.08005	4		Histone H2A.Z OS=Homo sapiens GN=H2AFZ PE=1 SV=2
P47914|RL29_HUMAN	95	17798.6	0.938584		1		60S ribosomal protein L29 OS=Homo sapiens GN=RPL29 PE=1 SV=2
P50914|RL14_HUMAN	88	23531.6	0.938688		1		60S ribosomal protein L14 OS=Homo sapiens GN=RPL14 PE=1 SV=4
P62910|RL32_HUMAN	74	15964.4	0.939182		1		60S ribosomal protein L32 OS=Homo sapiens GN=RPL32 PE=1 SV=2
P22626|ROA2_HUMAN	392	37464.2	0.939189	1.20445	9		Heterogeneous nuclear ribonucleoproteins A2/B1 OS=Homo sapiens GN=HNRNPA2B1 PE=1 SV=2
Q00325|MPCP_HUMAN	85	40525.4	0.942432	1.00614	2	*	Phosphate carrier protein, mitochondrial OS=Homo sapiens GN=SLC25A3 PE=1 SV=2
P12277|KCRB_HUMAN	54	42902.9	0.942578		1		Creatine kinase B-type OS=Homo sapiens GN=CKB PE=1 SV=1
Q9BTM1|H2AJ_HUMAN	356	14011.4	0.943678	1.08437	5		Histone H2A.J OS=Homo sapiens GN=H2AFJ PE=1 SV=1
Q8N3D4|EH1L1_HUMAN	83	162555	0.943749		1		EH domain-binding protein 1-like protein 1 OS=Homo sapiens GN=EHBP1L1 PE=1 SV=2
P07951|TPM2_HUMAN	720	32945.1	0.949982	1.14992	14		Tropomyosin beta chain OS=Homo sapiens GN=TPM2 PE=1 SV=1
P05387|RLA2_HUMAN	269	11658.4	0.950512		1		60S acidic ribosomal protein P2 OS=Homo sapiens GN=RPLP2 PE=1 SV=1
P27824|CALX_HUMAN	243	67982.5	0.950874	1.16307	5		Calnexin OS=Homo sapiens GN=CANX PE=1 SV=2
P62917|RL8_HUMAN	114	28235.9	0.951425	1.20886	2		60S ribosomal protein L8 OS=Homo sapiens GN=RPL8 PE=1 SV=2
P46781|RS9_HUMAN	159	22635.1	0.956283		1		40S ribosomal protein S9 OS=Homo sapiens GN=RPS9 PE=1 SV=3
P06753|TPM3_HUMAN	203	32856.3	0.964132	1.11725	7		Tropomyosin alpha-3 chain OS=Homo sapiens GN=TPM3 PE=1 SV=1
Q07666|KHDR1_HUMAN	67	48311.7	0.966418		1		KH domain-containing, RNA-binding, signal transduction-associated protein 1 OS=Homo sapiens GN=KHDRBS1 PE=1 SV=1
Q14157|UBP2L_HUMAN	54	114580	0.971058		1		Ubiquitin-associated protein 2-like OS=Homo sapiens GN=UBAP2L PE=1 SV=2
O75923|DYSF_HUMAN	102	239254	0.971378	1.15506	2		Dysferlin OS=Homo sapiens GN=DYSF PE=1 SV=1
P10412|H14_HUMAN	283	21852.5	0.972391	1.22274	8		Histone H1.4 OS=Homo sapiens GN=HIST1H1E PE=1 SV=2
P38646|GRP75_HUMAN	182	73920.4	0.974834	1.02969	3		Stress-70 protein, mitochondrial OS=Homo sapiens GN=HSPA9 PE=1 SV=2
P62805|H4_HUMAN	423	11360.9	0.974866	1.09887	7		Histone H4 OS=Homo sapiens GN=HIST1H4A PE=1 SV=2
Q0ZGT2|NEXN_HUMAN	56	80837.3	0.976087	1.10886	2		Nexilin OS=Homo sapiens GN=NEXN PE=1 SV=1
P46777|RL5_HUMAN	98	34569.3	0.977679	1.05714	2		60S ribosomal protein L5 OS=Homo sapiens GN=RPL5 PE=1 SV=3
P60468|SC61B_HUMAN	265	10025.6	0.979886		1		Protein transport protein Sec61 subunit beta OS=Homo sapiens GN=SEC61B PE=1 SV=2
Q9BSJ8|ESYT1_HUMAN	55	123294	0.980553		1		Extended synaptotagmin-1 OS=Homo sapiens GN=ESYT1 PE=1 SV=1
P04899|GNAI2_HUMAN	47	40995.8	0.986986		1		Guanine nucleotide-binding protein G(i) subunit alpha-2 OS=Homo sapiens GN=GNAI2 PE=1 SV=3
P62701|RS4X_HUMAN	80	29807.6	0.993502	1.32657	2		40S ribosomal protein S4, X isoform OS=Homo sapiens GN=RPS4X PE=1 SV=2
P45880|VDAC2_HUMAN	68	32060.2	0.993895	1.11193	4		Voltage-dependent anion-selective channel protein 2 OS=Homo sapiens GN=VDAC2 PE=1 SV=2
P25398|RS12_HUMAN	58	14905.1	0.993935	1.0146	2		40S ribosomal protein S12 OS=Homo sapiens GN=RPS12 PE=1 SV=3
P11142|HSP7C_HUMAN	793	71082.8	0.99416	1.12758	12		Heat shock cognate 71 kDa protein OS=Homo sapiens GN=HSPA8 PE=1 SV=1
P14625|ENPL_HUMAN	326	92696.9	0.994589	1.13274	10		Endoplasmin OS=Homo sapiens GN=HSP90B1 PE=1 SV=1
P51991|ROA3_HUMAN	297	39799.2	0.996379	1.03063	3		Heterogeneous nuclear ribonucleoprotein A3 OS=Homo sapiens GN=HNRNPA3 PE=1 SV=2
Q53GG5|PDLI3_HUMAN	120	39835.2	0.998654	1.32258	3		PDZ and LIM domain protein 3 OS=Homo sapiens GN=PDLIM3 PE=2 SV=1
Q07955|SRSF1_HUMAN	66	27842.4	1		1		Serine/arginine-rich splicing factor 1 OS=Homo sapiens GN=SRSF1 PE=1 SV=2
P67936|TPM4_HUMAN	230	28619	1.0027	1.10358	6		Tropomyosin alpha-4 chain OS=Homo sapiens GN=TPM4 PE=1 SV=3
Q92945|FUBP2_HUMAN	83	73443.7	1.00949		1		Far upstream element-binding protein 2 OS=Homo sapiens GN=KHSRP PE=1 SV=3
Q9NZM1|MYOF_HUMAN	166	236101	1.01437	1.04408	3		Myoferlin OS=Homo sapiens GN=MYOF PE=1 SV=1
P62736|ACTA_HUMAN	2951	42381.5	1.01952	1.28935	40		Actin, aortic smooth muscle OS=Homo sapiens GN=ACTA2 PE=1 SV=1
P68032|ACTC_HUMAN	3328	42334.5	1.01952	1.28935	40		Actin, alpha cardiac muscle 1 OS=Homo sapiens GN=ACTC1 PE=1 SV=1
Q9NYF8|BCLF1_HUMAN	81	106173	1.02235		1		Bcl-2-associated transcription factor 1 OS=Homo sapiens GN=BCLAF1 PE=1 SV=2
Q15233|NONO_HUMAN	78	54311.8	1.02328	1.24973	3		Non-POU domain-containing octamer-binding protein OS=Homo sapiens GN=NONO PE=1 SV=4
P04843|RPN1_HUMAN	158	68641.4	1.02409	1.22856	2		Dolichyl-diphosphooligosaccharide--protein glycosyltransferase subunit 1 OS=Homo sapiens GN=RPN1 PE=1 SV=1
P12829|MYL4_HUMAN	164	21665.4	1.02473	1.38885	2		Myosin light chain 4 OS=Homo sapiens GN=MYL4 PE=1 SV=3
P08133|ANXA6_HUMAN	541	76168.2	1.02488	1.16503	11		Annexin A6 OS=Homo sapiens GN=ANXA6 PE=1 SV=3
P04075|ALDOA_HUMAN	72	39852	1.02809	1.18633	2		Fructose-bisphosphate aldolase A OS=Homo sapiens GN=ALDOA PE=1 SV=2
P13591|NCAM1_HUMAN	118	95371	1.02937	1.04147	2		Neural cell adhesion molecule 1 OS=Homo sapiens GN=NCAM1 PE=1 SV=3
P52272|HNRPM_HUMAN	120	77749.9	1.03041	1.02438	2		Heterogeneous nuclear ribonucleoprotein M OS=Homo sapiens GN=HNRNPM PE=1 SV=3
P25705|ATPA_HUMAN	266	59828.1	1.03389	1.13759	5		ATP synthase subunit alpha, mitochondrial OS=Homo sapiens GN=ATP5A1 PE=1 SV=1
Q00839|HNRPU_HUMAN	63	91269.8	1.03544	1.10588	2		Heterogeneous nuclear ribonucleoprotein U OS=Homo sapiens GN=HNRNPU PE=1 SV=6
P62979|RS27A_HUMAN	158	18296.1	1.04044	1.0976	3		Ubiquitin-40S ribosomal protein S27a OS=Homo sapiens GN=RPS27A PE=1 SV=2
P07237|PDIA1_HUMAN	321	57480.3	1.04185	1.28567	8		Protein disulfide-isomerase OS=Homo sapiens GN=P4HB PE=1 SV=3
P12814|ACTN1_HUMAN	1330	103563	1.04226	1.20037	28		Alpha-actinin-1 OS=Homo sapiens GN=ACTN1 PE=1 SV=2
P05067|A4_HUMAN	84	87914.9	1.04291		1		Amyloid beta A4 protein OS=Homo sapiens GN=APP PE=1 SV=3
P11021|GRP78_HUMAN	823	72403	1.04404	NN	13		78 kDa glucose-regulated protein OS=Homo sapiens GN=HSPA5 PE=1 SV=2
P11279|LAMP1_HUMAN	47	45367.5	1.0469	1.04954	2		Lysosome-associated membrane glycoprotein 1 OS=Homo sapiens GN=LAMP1 PE=1 SV=3
Q96D15|RCN3_HUMAN	100	37470.5	1.04785		1		Reticulocalbin-3 OS=Homo sapiens GN=RCN3 PE=1 SV=1
P27797|CALR_HUMAN	494	48283.4	1.04836	1.19049	7		Calreticulin OS=Homo sapiens GN=CALR PE=1 SV=1
Q14697|GANAB_HUMAN	189	107263	1.0531	1.16947	4		Neutral alpha-glucosidase AB OS=Homo sapiens GN=GANAB PE=1 SV=3
P14314|GLU2B_HUMAN	97	60357.7	1.0579		1		Glucosidase 2 subunit beta OS=Homo sapiens GN=PRKCSH PE=1 SV=2
P61978|HNRPK_HUMAN	215	51230	1.06047	1.31008	3		Heterogeneous nuclear ribonucleoprotein K OS=Homo sapiens GN=HNRNPK PE=1 SV=1
P24539|AT5F1_HUMAN	110	28947.9	1.06176		1		ATP synthase subunit b, mitochondrial OS=Homo sapiens GN=ATP5F1 PE=1 SV=2
Q15149|PLEC_HUMAN	742	533462	1.06628	1.23243	26		Plectin OS=Homo sapiens GN=PLEC PE=1 SV=3
P40926|MDHM_HUMAN	130	35937.4	1.07817	1.14146	3		Malate dehydrogenase, mitochondrial OS=Homo sapiens GN=MDH2 PE=1 SV=3
Q00610|CLH1_HUMAN	149	193261	1.08079	1.2422	4		Clathrin heavy chain 1 OS=Homo sapiens GN=CLTC PE=1 SV=5
Q07065|CKAP4_HUMAN	291	66097.3	1.08197	1.27743	6		Cytoskeleton-associated protein 4 OS=Homo sapiens GN=CKAP4 PE=1 SV=2
O43852|CALU_HUMAN	227	37198.1	1.08286	1.09093	10	*	Calumenin OS=Homo sapiens GN=CALU PE=1 SV=2
P29692|EF1D_HUMAN	153	31217.3	1.08453	1.15087	3		Elongation factor 1-delta OS=Homo sapiens GN=EEF1D PE=1 SV=5
P14618|KPYM_HUMAN	296	58470.7	1.08486	1.25194	8		Pyruvate kinase isozymes M1/M2 OS=Homo sapiens GN=PKM2 PE=1 SV=4
P39023|RL3_HUMAN	66	46365.4	1.09495	1.26956	2		60S ribosomal protein L3 OS=Homo sapiens GN=RPL3 PE=1 SV=2
P30101|PDIA3_HUMAN	339	57146.4	1.09653	1.32766	8		Protein disulfide-isomerase A3 OS=Homo sapiens GN=PDIA3 PE=1 SV=4
P32969|RL9_HUMAN	65	21964.3	1.09772		1		60S ribosomal protein L9 OS=Homo sapiens GN=RPL9 PE=1 SV=1
Q8WWI1|LMO7_HUMAN	134	194002	1.09966	1.09244	2		LIM domain only protein 7 OS=Homo sapiens GN=LMO7 PE=1 SV=3
P27816|MAP4_HUMAN	93	121444	1.09982		1		Microtubule-associated protein 4 OS=Homo sapiens GN=MAP4 PE=1 SV=3
P07355|ANXA2_HUMAN	1271	38808.4	1.10095	1.33509	19		Annexin A2 OS=Homo sapiens GN=ANXA2 PE=1 SV=2
P23528|COF1_HUMAN	76	18719.2	1.10341		1		Cofilin-1 OS=Homo sapiens GN=CFL1 PE=1 SV=3
O43707|ACTN4_HUMAN	1371	105245	1.10632	1.18553	27	*	Alpha-actinin-4 OS=Homo sapiens GN=ACTN4 PE=1 SV=2
P12235|ADT1_HUMAN	69	33271.8	1.11208	1.16026	3		ADP/ATP translocase 1 OS=Homo sapiens GN=SLC25A4 PE=1 SV=4
Q5VTE0|EF1A3_HUMAN	301	50495.8	1.11261	1.20921	6		Putative elongation factor 1-alpha-like 3 OS=Homo sapiens GN=EEF1AL3 PE=5 SV=1
Q6PEY2|TBA3E_HUMAN	191	50568.3	1.11694		1		Tubulin alpha-3E chain OS=Homo sapiens GN=TUBA3E PE=1 SV=2
P31946|1433B_HUMAN	187	28179.4	1.11716	1.07125	3		14-3-3 protein beta/alpha OS=Homo sapiens GN=YWHAB PE=1 SV=3
P26641|EF1G_HUMAN	158	50429.8	1.11775		1		Elongation factor 1-gamma OS=Homo sapiens GN=EEF1G PE=1 SV=3
P23284|PPIB_HUMAN	177	23785.1	1.11785	1.17907	7		Peptidyl-prolyl cis-trans isomerase B OS=Homo sapiens GN=PPIB PE=1 SV=2
P60981|DEST_HUMAN	47	18950.2	1.11854		1		Destrin OS=Homo sapiens GN=DSTN PE=1 SV=3
Q9BYX7|ACTBM_HUMAN	897	42331.5	1.12253	1.07059	5	*	Putative beta-actin-like protein 3 OS=Homo sapiens GN=POTEKP PE=5 SV=1
P27701|CD82_HUMAN	110	30233.5	1.12434		1		CD82 antigen OS=Homo sapiens GN=CD82 PE=1 SV=1
P62888|RL30_HUMAN	46	12947.3	1.12892		1		60S ribosomal protein L30 OS=Homo sapiens GN=RPL30 PE=1 SV=2
P08123|CO1A2_HUMAN	128	129749	1.12996	1.18861	2		Collagen alpha-2(I) chain OS=Homo sapiens GN=COL1A2 PE=1 SV=7
Q09666|AHNK_HUMAN	275	629213	1.13075	1.19847	7		Neuroblast differentiation-associated protein AHNAK OS=Homo sapiens GN=AHNAK PE=1 SV=2
P49411|EFTU_HUMAN	93	49852.8	1.13158	1.08123	2		Elongation factor Tu, mitochondrial OS=Homo sapiens GN=TUFM PE=1 SV=2
Q8NCQ2|CS034_HUMAN	47	16232	1.1317		1		Uncharacterized protein C19orf34 OS=Homo sapiens GN=C19orf34 PE=2 SV=2
O14950|ML12B_HUMAN	101	19824	1.13395	1.05904	4	*	Myosin regulatory light chain 12B OS=Homo sapiens GN=MYL12B PE=1 SV=2
P60709|ACTB_HUMAN	3316	42052.4	1.13404	1.18233	35	*	Actin, cytoplasmic 1 OS=Homo sapiens GN=ACTB PE=1 SV=1
P62873|GBB1_HUMAN	72	38151.8	1.13483	1.04981	2		Guanine nucleotide-binding protein G(I)/G(S)/G(T) subunit beta-1 OS=Homo sapiens GN=GNB1 PE=1 SV=3
Q9UBG0|MRC2_HUMAN	72	169743	1.13586		1		C-type mannose receptor 2 OS=Homo sapiens GN=MRC2 PE=1 SV=1
P02511|CRYAB_HUMAN	44	20146.9	1.13792	1.12309	2		Alpha-crystallin B chain OS=Homo sapiens GN=CRYAB PE=1 SV=2
Q02878|RL6_HUMAN	62	32765.2	1.13891	1.22256	2		60S ribosomal protein L6 OS=Homo sapiens GN=RPL6 PE=1 SV=3
Q14315|FLNC_HUMAN	1356	293407	1.13912	1.21725	33	*	Filamin-C OS=Homo sapiens GN=FLNC PE=1 SV=3
Q15084|PDIA6_HUMAN	231	48490.9	1.14268	1.13003	4		Protein disulfide-isomerase A6 OS=Homo sapiens GN=PDIA6 PE=1 SV=1
Q99798|ACON_HUMAN	76	86113.7	1.14646		1		Aconitate hydratase, mitochondrial OS=Homo sapiens GN=ACO2 PE=1 SV=2
Q562R1|ACTBL_HUMAN	1056	42318.6	1.15083	NN	17		Beta-actin-like protein 2 OS=Homo sapiens GN=ACTBL2 PE=1 SV=2
P05556|ITB1_HUMAN	126	91664.8	1.15871	1.21699	5		Integrin beta-1 OS=Homo sapiens GN=ITGB1 PE=1 SV=2
P31949|S10AB_HUMAN	63	11847.4	1.16032		1		Protein S100-A11 OS=Homo sapiens GN=S100A11 PE=1 SV=2
P23588|IF4B_HUMAN	106	69167.8	1.16213	1.33157	3		Eukaryotic translation initiation factor 4B OS=Homo sapiens GN=EIF4B PE=1 SV=2
P23396|RS3_HUMAN	55	26843	1.16854	1.14775	3		40S ribosomal protein S3 OS=Homo sapiens GN=RPS3 PE=1 SV=2
Q6WCQ1|MPRIP_HUMAN	45	117260	1.18762		1		Myosin phosphatase Rho-interacting protein OS=Homo sapiens GN=MPRIP PE=1 SV=3
P29966|MARCS_HUMAN	154	31707.4	1.19559	1.15654	3		Myristoylated alanine-rich C-kinase substrate OS=Homo sapiens GN=MARCKS PE=1 SV=4
P62269|RS18_HUMAN	48	17708.4	1.20002	1.00149	2	*	40S ribosomal protein S18 OS=Homo sapiens GN=RPS18 PE=1 SV=3
Q15293|RCN1_HUMAN	69	38866.7	1.20218		1		Reticulocalbin-1 OS=Homo sapiens GN=RCN1 PE=1 SV=1
P51659|DHB4_HUMAN	70	80093	1.20467		1		Peroxisomal multifunctional enzyme type 2 OS=Homo sapiens GN=HSD17B4 PE=1 SV=3
P08670|VIME_HUMAN	2473	53676.6	1.20559	1.17619	36	*	Vimentin OS=Homo sapiens GN=VIM PE=1 SV=4
P04406|G3P_HUMAN	353	36202	1.20909	1.1833	5		Glyceraldehyde-3-phosphate dehydrogenase OS=Homo sapiens GN=GAPDH PE=1 SV=3
O95810|SDPR_HUMAN	78	47202.1	1.21992		1		Serum deprivation-response protein OS=Homo sapiens GN=SDPR PE=1 SV=3
P06396|GELS_HUMAN	58	86043.8	1.23077		1		Gelsolin OS=Homo sapiens GN=GSN PE=1 SV=1
P07339|CATD_HUMAN	125	45037.3	1.24006	1.25885	5		Cathepsin D OS=Homo sapiens GN=CTSD PE=1 SV=1
Q03135|CAV1_HUMAN	257	20630	1.25611	1.03811	2		Caveolin-1 OS=Homo sapiens GN=CAV1 PE=1 SV=4
Q9P2E9|RRBP1_HUMAN	123	152780	1.2607	1.18035	4		Ribosome-binding protein 1 OS=Homo sapiens GN=RRBP1 PE=1 SV=4
Q9HDC9|APMAP_HUMAN	75	46622.4	1.26126		1		Adipocyte plasma membrane-associated protein OS=Homo sapiens GN=APMAP PE=1 SV=2
P60660|MYL6_HUMAN	296	17090.7	1.26351	1.16205	3		Myosin light polypeptide 6 OS=Homo sapiens GN=MYL6 PE=1 SV=2
P19367|HXK1_HUMAN	90	103561	1.267		1		Hexokinase-1 OS=Homo sapiens GN=HK1 PE=1 SV=3
Q6NZI2|PTRF_HUMAN	246	43450.3	1.26741	1.27984	2		Polymerase I and transcript release factor OS=Homo sapiens GN=PTRF PE=1 SV=1
P48047|ATPO_HUMAN	59	23377.2	1.27021		1		ATP synthase subunit O, mitochondrial OS=Homo sapiens GN=ATP5O PE=1 SV=1
P98160|PGBM_HUMAN	108	479221	1.27343	1.19365	5	*	Basement membrane-specific heparan sulfate proteoglycan core protein OS=Homo sapiens GN=HSPG2 PE=1 SV=3
P07602|SAP_HUMAN	61	59899	1.31128		1		Proactivator polypeptide OS=Homo sapiens GN=PSAP PE=1 SV=2
Q9NZN4|EHD2_HUMAN	64	61294.3	1.3228		1		EH domain-containing protein 2 OS=Homo sapiens GN=EHD2 PE=1 SV=2
Q9Y696|CLIC4_HUMAN	101	28982.3	1.32428		1		Chloride intracellular channel protein 4 OS=Homo sapiens GN=CLIC4 PE=1 SV=4
P35579|MYH9_HUMAN	1668	227647	1.38203	1.25814	29	*	Myosin-9 OS=Homo sapiens GN=MYH9 PE=1 SV=4
Q969H8|CS010_HUMAN	69	18897.9	1.4		1		UPF0556 protein C19orf10 OS=Homo sapiens GN=C19orf10 PE=1 SV=1
P02751|FINC_HUMAN	909	266053	1.44458	1.25381	22	*	Fibronectin OS=Homo sapiens GN=FN1 PE=1 SV=4
P21333|FLNA_HUMAN	1429	283301	1.45859	1.20718	40	*	Filamin-A OS=Homo sapiens GN=FLNA PE=1 SV=4
P07996|TSP1_HUMAN	148	133292	1.46415	1.11001	2		Thrombospondin-1 OS=Homo sapiens GN=THBS1 PE=1 SV=2
P04216|THY1_HUMAN	57	18151.9	1.56283		1		Thy-1 membrane glycoprotein OS=Homo sapiens GN=THY1 PE=1 SV=2
Q05682|CALD1_HUMAN	167	93252	1.60077	1.24494	3		Caldesmon OS=Homo sapiens GN=CALD1 PE=1 SV=2
Q92743|HTRA1_HUMAN	71	52167.5	1.67901	1.77377	2		Serine protease HTRA1 OS=Homo sapiens GN=HTRA1 PE=1 SV=1
P62258|1433E_HUMAN	97	29327	1.68936	1.02876	2	*	14-3-3 protein epsilon OS=Homo sapiens GN=YWHAE PE=1 SV=1
P05186|PPBT_HUMAN	54	57611.2	1.95932		1		Alkaline phosphatase, tissue-nonspecific isozyme OS=Homo sapiens GN=ALPL PE=1 SV=4
