# Supplementary material for: FSHD Myotubes with Different Phenotypes Exhibit Distinct Proteomes
Source: PLoS One. 2012 Dec 18;7(12):e51865. doi: 10.1371/journal.pone.0051865 (PMC3525578; doi:10.1371/journal.pone.0051865)
Supplement: Table S8 — Raw data: analysis #aFSHD3_NE. (XLSX) [file pone.0051865.s012.xlsx]

## Sheet: aFSHD3_NE
Accession	Score	Mass	H/L	SD(geo)	#	T.Test	Description
O15075|DCLK1_HUMAN	43	82743.7	P		0		Serine/threonine-protein kinase DCLK1 OS=Homo sapiens GN=DCLK1 PE=1 SV=2
O60662|KBTBA_HUMAN	42	68792.7	P		0		Kelch repeat and BTB domain-containing protein 10 OS=Homo sapiens GN=KBTBD10 PE=1 SV=2
P04406|G3P_HUMAN	54	36202	P		0		Glyceraldehyde-3-phosphate dehydrogenase OS=Homo sapiens GN=GAPDH PE=1 SV=3
P05976|MYL1_HUMAN	194	21189.3	P		0		Myosin light chain 1/3, skeletal muscle isoform OS=Homo sapiens GN=MYL1 PE=1 SV=3
P08238|HS90B_HUMAN	85	83554.7	P		0		Heat shock protein HSP 90-beta OS=Homo sapiens GN=HSP90AB1 PE=1 SV=4
P12107|COBA1_HUMAN	52	181581	P		0		Collagen alpha-1(XI) chain OS=Homo sapiens GN=COL11A1 PE=1 SV=4
P13805|TNNT1_HUMAN	120	32985.4	P		0		Troponin T, slow skeletal muscle OS=Homo sapiens GN=TNNT1 PE=1 SV=4
P19338|NUCL_HUMAN	41	76625.9	P		0		Nucleolin OS=Homo sapiens GN=NCL PE=1 SV=3
P21291|CSRP1_HUMAN	42	21409.6	P		0		Cysteine and glycine-rich protein 1 OS=Homo sapiens GN=CSRP1 PE=1 SV=3
P23284|PPIB_HUMAN	82	23785.1	P		0		Peptidyl-prolyl cis-trans isomerase B OS=Homo sapiens GN=PPIB PE=1 SV=2
P35527|K1C9_HUMAN	188	62255.4	P		0		Keratin, type I cytoskeletal 9 OS=Homo sapiens GN=KRT9 PE=1 SV=3
P35908|K22E_HUMAN	61	65678.8	P		0		Keratin, type II cytoskeletal 2 epidermal OS=Homo sapiens GN=KRT2 PE=1 SV=2
P48995|TRPC1_HUMAN	39	92236.7	P		0		Short transient receptor potential channel 1 OS=Homo sapiens GN=TRPC1 PE=1 SV=1
P62910|RL32_HUMAN	43	15964.4	P		0		60S ribosomal protein L32 OS=Homo sapiens GN=RPL32 PE=1 SV=2
P63316|TNNC1_HUMAN	66	18505.1	P		0		Troponin C, slow skeletal and cardiac muscles OS=Homo sapiens GN=TNNC1 PE=1 SV=1
Q00325|MPCP_HUMAN	42	40525.4	P		0		Phosphate carrier protein, mitochondrial OS=Homo sapiens GN=SLC25A3 PE=1 SV=2
Q00341|VIGLN_HUMAN	52	141996	P		0		Vigilin OS=Homo sapiens GN=HDLBP PE=1 SV=2
Q09666|AHNK_HUMAN	53	629213	P		0		Neuroblast differentiation-associated protein AHNAK OS=Homo sapiens GN=AHNAK PE=1 SV=2
Q13203|MYBPH_HUMAN	53	52531.2	P		0		Myosin-binding protein H OS=Homo sapiens GN=MYBPH PE=2 SV=4
Q13435|SF3B2_HUMAN	58	100280	P		0		Splicing factor 3B subunit 2 OS=Homo sapiens GN=SF3B2 PE=1 SV=2
Q14151|SAFB2_HUMAN	40	107922	P		0		Scaffold attachment factor B2 OS=Homo sapiens GN=SAFB2 PE=1 SV=1
Q16527|CSRP2_HUMAN	88	21852.7	P		0		Cysteine and glycine-rich protein 2 OS=Homo sapiens GN=CSRP2 PE=1 SV=3
Q6NZI2|PTRF_HUMAN	101	43450.3	P		0		Polymerase I and transcript release factor OS=Homo sapiens GN=PTRF PE=1 SV=1
Q6WCQ1|MPRIP_HUMAN	48	117260	P		0		Myosin phosphatase Rho-interacting protein OS=Homo sapiens GN=MPRIP PE=1 SV=3
Q8WWM7|ATX2L_HUMAN	45	113589	P		0		Ataxin-2-like protein OS=Homo sapiens GN=ATXN2L PE=1 SV=2
Q9P0L0|VAPA_HUMAN	48	28103.8	P		0		Vesicle-associated membrane protein-associated protein A OS=Homo sapiens GN=VAPA PE=1 SV=3
P13535|MYH8_HUMAN	1063	223594	0.451118	1.07153	3	*	Myosin-8 OS=Homo sapiens GN=MYH8 PE=1 SV=3
Q96A32|MLRS_HUMAN	139	19117	0.508248	1.07222	2	*	Myosin regulatory light chain 2, skeletal muscle isoform OS=Homo sapiens GN=MYLPF PE=2 SV=1
P11055|MYH3_HUMAN	2881	224850	0.565509	1.24921	28	*	Myosin-3 OS=Homo sapiens GN=MYH3 PE=1 SV=3
P67809|YBOX1_HUMAN	135	35903.2	0.617239	1.2183	3		Nuclease-sensitive element-binding protein 1 OS=Homo sapiens GN=YBX1 PE=1 SV=3
P30050|RL12_HUMAN	116	17979.1	0.624256	1.2381	2		60S ribosomal protein L12 OS=Homo sapiens GN=RPL12 PE=1 SV=1
P36578|RL4_HUMAN	97	47953	0.624694		1		60S ribosomal protein L4 OS=Homo sapiens GN=RPL4 PE=1 SV=5
Q9H987|SYP2L_HUMAN	107	102703	0.670224	1.18707	2		Synaptopodin 2-like protein OS=Homo sapiens GN=SYNPO2L PE=2 SV=3
P62258|1433E_HUMAN	48	29327	0.686705		1		14-3-3 protein epsilon OS=Homo sapiens GN=YWHAE PE=1 SV=1
O43390|HNRPR_HUMAN	63	71184.9	0.697011		1		Heterogeneous nuclear ribonucleoprotein R OS=Homo sapiens GN=HNRNPR PE=1 SV=1
P05387|RLA2_HUMAN	192	11658.4	0.697619	1.28582	2		60S acidic ribosomal protein P2 OS=Homo sapiens GN=RPLP2 PE=1 SV=1
Q13813|SPTA2_HUMAN	318	285163	0.709372	1.13698	6	*	Spectrin alpha chain, brain OS=Homo sapiens GN=SPTAN1 PE=1 SV=3
Q8WZ42|TITIN_HUMAN	329	3.84312e+06	0.713796	1.18424	8	*	Titin OS=Homo sapiens GN=TTN PE=1 SV=2
P12883|MYH7_HUMAN	1228	223758	0.725324	1.30227	5		Myosin-7 OS=Homo sapiens GN=MYH7 PE=1 SV=5
Q13263|TIF1B_HUMAN	117	90261.6	0.731292		1		Transcription intermediary factor 1-beta OS=Homo sapiens GN=TRIM28 PE=1 SV=5
P14866|HNRPL_HUMAN	122	64720.1	0.733458		1		Heterogeneous nuclear ribonucleoprotein L OS=Homo sapiens GN=HNRNPL PE=1 SV=2
Q96PK6|RBM14_HUMAN	50	69620.5	0.744621		1		RNA-binding protein 14 OS=Homo sapiens GN=RBM14 PE=1 SV=2
Q07065|CKAP4_HUMAN	119	66097.3	0.746605		1		Cytoskeleton-associated protein 4 OS=Homo sapiens GN=CKAP4 PE=1 SV=2
Q14980|NUMA1_HUMAN	77	239199	0.750064		1		Nuclear mitotic apparatus protein 1 OS=Homo sapiens GN=NUMA1 PE=1 SV=2
P14649|MYL6B_HUMAN	365	22864.2	0.769379	1.05382	5	*	Myosin light chain 6B OS=Homo sapiens GN=MYL6B PE=1 SV=1
P26038|MOES_HUMAN	57	67892.3	0.779196		1		Moesin OS=Homo sapiens GN=MSN PE=1 SV=3
Q9UKX2|MYH2_HUMAN	1103	223933	0.781934	1.07583	2		Myosin-2 OS=Homo sapiens GN=MYH2 PE=1 SV=1
P16401|H15_HUMAN	46	22567	0.816968		1		Histone H1.5 OS=Homo sapiens GN=HIST1H1B PE=1 SV=3
P19237|TNNI1_HUMAN	230	21850.1	0.826415	1.2264	4		Troponin I, slow skeletal muscle OS=Homo sapiens GN=TNNI1 PE=1 SV=3
Q5VTE0|EF1A3_HUMAN	138	50495.8	0.85	1.29	3		Putative elongation factor 1-alpha-like 3 OS=Homo sapiens GN=EEF1AL3 PE=5 SV=1
Q16186|ADRM1_HUMAN	39	42412.4	0.850105		1		Proteasomal ubiquitin receptor ADRM1 OS=Homo sapiens GN=ADRM1 PE=1 SV=2
Q00839|HNRPU_HUMAN	50	91269.8	0.851508		1		Heterogeneous nuclear ribonucleoprotein U OS=Homo sapiens GN=HNRNPU PE=1 SV=6
P62318|SMD3_HUMAN	84	14021.9	0.857127		1		Small nuclear ribonucleoprotein Sm D3 OS=Homo sapiens GN=SNRPD3 PE=1 SV=1
Q14764|MVP_HUMAN	110	99551.5	0.864187	1.10406	3		Major vault protein OS=Homo sapiens GN=MVP PE=1 SV=4
Q13283|G3BP1_HUMAN	87	52189.6	0.870308		1		Ras GTPase-activating protein-binding protein 1 OS=Homo sapiens GN=G3BP1 PE=1 SV=1
P12956|XRCC6_HUMAN	75	70084.7	0.874082		1		X-ray repair cross-complementing protein 6 OS=Homo sapiens GN=XRCC6 PE=1 SV=2
P39023|RL3_HUMAN	39	46365.4	0.87525		1		60S ribosomal protein L3 OS=Homo sapiens GN=RPL3 PE=1 SV=2
Q92841|DDX17_HUMAN	97	72953.7	0.882153		1		Probable ATP-dependent RNA helicase DDX17 OS=Homo sapiens GN=DDX17 PE=1 SV=1
P61313|RL15_HUMAN	38	24245.6	0.885051		1		60S ribosomal protein L15 OS=Homo sapiens GN=RPL15 PE=1 SV=2
P48681|NEST_HUMAN	1782	177789	0.890132	1.27065	31	*	Nestin OS=Homo sapiens GN=NES PE=1 SV=2
P07355|ANXA2_HUMAN	54	38808.4	0.890819	1.19052	2		Annexin A2 OS=Homo sapiens GN=ANXA2 PE=1 SV=2
P13591|NCAM1_HUMAN	43	95371	0.898103		1		Neural cell adhesion molecule 1 OS=Homo sapiens GN=NCAM1 PE=1 SV=3
O14974|MYPT1_HUMAN	86	115611	0.911154		1		Protein phosphatase 1 regulatory subunit 12A OS=Homo sapiens GN=PPP1R12A PE=1 SV=1
P61978|HNRPK_HUMAN	202	51230	0.920548	1.26578	4		Heterogeneous nuclear ribonucleoprotein K OS=Homo sapiens GN=HNRNPK PE=1 SV=1
P52272|HNRPM_HUMAN	114	77749.9	0.923109	1.15927	7		Heterogeneous nuclear ribonucleoprotein M OS=Homo sapiens GN=HNRNPM PE=1 SV=3
Q9BVA1|TBB2B_HUMAN	218	50377.6	0.943963	1.15236	3		Tubulin beta-2B chain OS=Homo sapiens GN=TUBB2B PE=1 SV=1
O00159|MYO1C_HUMAN	124	122504	0.946921		1		Myosin-Ic OS=Homo sapiens GN=MYO1C PE=1 SV=3
Q08211|DHX9_HUMAN	105	142181	0.951621		1		ATP-dependent RNA helicase A OS=Homo sapiens GN=DHX9 PE=1 SV=4
P05386|RLA1_HUMAN	46	11621.2	0.953704		1		60S acidic ribosomal protein P1 OS=Homo sapiens GN=RPLP1 PE=1 SV=1
P45379|TNNT2_HUMAN	305	35902.4	0.961336	1.17451	5		Troponin T, cardiac muscle OS=Homo sapiens GN=TNNT2 PE=1 SV=3
Q8NHW5|RLA0L_HUMAN	70	34514.3	0.962774		1		60S acidic ribosomal protein P0-like OS=Homo sapiens PE=1 SV=1
P61247|RS3A_HUMAN	51	30154.3	0.965611		1		40S ribosomal protein S3a OS=Homo sapiens GN=RPS3A PE=1 SV=2
P12829|MYL4_HUMAN	789	21665.4	0.970454	1.23541	4		Myosin light chain 4 OS=Homo sapiens GN=MYL4 PE=1 SV=3
Q9UMS6|SYNP2_HUMAN	227	118069	0.973471	1.19802	4		Synaptopodin-2 OS=Homo sapiens GN=SYNPO2 PE=1 SV=2
Q9Y490|TLN1_HUMAN	298	271766	0.973658	1.07673	2		Talin-1 OS=Homo sapiens GN=TLN1 PE=1 SV=3
P35637|FUS_HUMAN	52	53622.4	0.974593		1		RNA-binding protein FUS OS=Homo sapiens GN=FUS PE=1 SV=1
Q6PEY2|TBA3E_HUMAN	147	50568.3	0.976298	1.11644	3		Tubulin alpha-3E chain OS=Homo sapiens GN=TUBA3E PE=1 SV=2
Q15233|NONO_HUMAN	64	54311.8	0.976315		1		Non-POU domain-containing octamer-binding protein OS=Homo sapiens GN=NONO PE=1 SV=4
P50454|SERPH_HUMAN	94	46525.7	0.978508		1		Serpin H1 OS=Homo sapiens GN=SERPINH1 PE=1 SV=2
Q01082|SPTB2_HUMAN	192	275237	0.979573		1		Spectrin beta chain, brain 1 OS=Homo sapiens GN=SPTBN1 PE=1 SV=2
Q14315|FLNC_HUMAN	574	293407	0.987308	1.21955	14		Filamin-C OS=Homo sapiens GN=FLNC PE=1 SV=3
P11142|HSP7C_HUMAN	329	71082.8	0.98782	1.14587	6		Heat shock cognate 71 kDa protein OS=Homo sapiens GN=HSPA8 PE=1 SV=1
P50914|RL14_HUMAN	81	23531.6	0.990137		1		60S ribosomal protein L14 OS=Homo sapiens GN=RPL14 PE=1 SV=4
Q9NVA2|SEP11_HUMAN	120	49652.8	0.991243		1		Septin-11 OS=Homo sapiens GN=SEPT11 PE=1 SV=3
Q02878|RL6_HUMAN	116	32765.2	0.994814	1.0225	2		60S ribosomal protein L6 OS=Homo sapiens GN=RPL6 PE=1 SV=3
Q12906|ILF3_HUMAN	49	95678.7	1		1		Interleukin enhancer-binding factor 3 OS=Homo sapiens GN=ILF3 PE=1 SV=3
Q13838|UAP56_HUMAN	65	49416.6	1		1		Spliceosome RNA helicase BAT1 OS=Homo sapiens GN=BAT1 PE=1 SV=1
Q07020|RL18_HUMAN	58	21735.6	1.00152		1		60S ribosomal protein L18 OS=Homo sapiens GN=RPL18 PE=1 SV=2
P35609|ACTN2_HUMAN	943	104359	1.00728	1.25308	13		Alpha-actinin-2 OS=Homo sapiens GN=ACTN2 PE=1 SV=1
P55795|HNRH2_HUMAN	55	49517.9	1.00866		1		Heterogeneous nuclear ribonucleoprotein H2 OS=Homo sapiens GN=HNRNPH2 PE=1 SV=1
P18124|RL7_HUMAN	71	29264.7	1.01013	1.01701	2		60S ribosomal protein L7 OS=Homo sapiens GN=RPL7 PE=1 SV=1
Q702N8|XIRP1_HUMAN	387	199637	1.02214	1.1492	10		Xin actin-binding repeat-containing protein 1 OS=Homo sapiens GN=XIRP1 PE=1 SV=1
Q07955|SFRS1_HUMAN	44	27842.4	1.02243		1		Splicing factor, arginine/serine-rich 1 OS=Homo sapiens GN=SFRS1 PE=1 SV=2
P62917|RL8_HUMAN	108	28235.9	1.03589	1.30074	2		60S ribosomal protein L8 OS=Homo sapiens GN=RPL8 PE=1 SV=2
P06748|NPM_HUMAN	137	32726.4	1.04921	1.23694	2		Nucleophosmin OS=Homo sapiens GN=NPM1 PE=1 SV=2
P05204|HMGN2_HUMAN	43	9387.56	1.05703		1		Non-histone chromosomal protein HMG-17 OS=Homo sapiens GN=HMGN2 PE=1 SV=3
Q0ZGT2|NEXN_HUMAN	149	80837.3	1.05744	1.15667	3		Nexilin OS=Homo sapiens GN=NEXN PE=1 SV=1
P51991|ROA3_HUMAN	222	39799.2	1.0579		1		Heterogeneous nuclear ribonucleoprotein A3 OS=Homo sapiens GN=HNRNPA3 PE=1 SV=2
Q53GG5|PDLI3_HUMAN	59	39835.2	1.07421		1		PDZ and LIM domain protein 3 OS=Homo sapiens GN=PDLIM3 PE=2 SV=1
P02452|CO1A1_HUMAN	440	139883	1.07509	1.10612	7		Collagen alpha-1(I) chain OS=Homo sapiens GN=COL1A1 PE=1 SV=5
Q03135|CAV1_HUMAN	104	20630	1.07548		1		Caveolin-1 OS=Homo sapiens GN=CAV1 PE=1 SV=4
P62805|H4_HUMAN	424	11360.9	1.07636	1.34105	7		Histone H4 OS=Homo sapiens GN=HIST1H4A PE=1 SV=2
P20700|LMNB1_HUMAN	71	66653.2	1.08856	1.06159	2		Lamin-B1 OS=Homo sapiens GN=LMNB1 PE=1 SV=2
P22626|ROA2_HUMAN	367	37464.2	1.09508	1.20445	4		Heterogeneous nuclear ribonucleoproteins A2/B1 OS=Homo sapiens GN=HNRNPA2B1 PE=1 SV=2
Q9NR12|PDLI7_HUMAN	108	50896.5	1.11417	1.16497	2		PDZ and LIM domain protein 7 OS=Homo sapiens GN=PDLIM7 PE=1 SV=1
P62263|RS14_HUMAN	120	16434.1	1.12401		1		40S ribosomal protein S14 OS=Homo sapiens GN=RPS14 PE=1 SV=3
Q8WWI1|LMO7_HUMAN	174	194016	1.12505	1.22359	3		LIM domain only protein 7 OS=Homo sapiens GN=LMO7 PE=1 SV=2
P46063|RECQ1_HUMAN	59	74436.9	1.12539		1		ATP-dependent DNA helicase Q1 OS=Homo sapiens GN=RECQL PE=1 SV=3
P68032|ACTC_HUMAN	2508	42334.5	1.13022	1.22147	26	*	Actin, alpha cardiac muscle 1 OS=Homo sapiens GN=ACTC1 PE=1 SV=1
P38159|HNRPG_HUMAN	78	42306.8	1.13283	1.18317	4		Heterogeneous nuclear ribonucleoprotein G OS=Homo sapiens GN=RBMX PE=1 SV=3
P12814|ACTN1_HUMAN	1139	103563	1.1333	1.26616	20	*	Alpha-actinin-1 OS=Homo sapiens GN=ACTN1 PE=1 SV=2
Q6ZMH5|S39A5_HUMAN	38	0.5	1.1477		1		0
P07951|TPM2_HUMAN	478	32945.1	1.16257	1.15662	4		Tropomyosin beta chain OS=Homo sapiens GN=TPM2 PE=1 SV=1
P08123|CO1A2_HUMAN	158	129749	1.16522	1.31125	4		Collagen alpha-2(I) chain OS=Homo sapiens GN=COL1A2 PE=1 SV=7
Q5QNW6|H2B2F_HUMAN	275	13912.1	1.17222	1.28891	5		Histone H2B type 2-F OS=Homo sapiens GN=HIST2H2BF PE=1 SV=3
O43707|ACTN4_HUMAN	1030	105245	1.17624	1.26076	19	*	Alpha-actinin-4 OS=Homo sapiens GN=ACTN4 PE=1 SV=2
Q92743|HTRA1_HUMAN	62	52167.5	1.17678		1		Serine protease HTRA1 OS=Homo sapiens GN=HTRA1 PE=1 SV=1
P10412|H14_HUMAN	86	21852.5	1.18726	1.23383	2		Histone H1.4 OS=Homo sapiens GN=HIST1H1E PE=1 SV=2
P23246|SFPQ_HUMAN	270	76216.2	1.19033	1.08449	2		Splicing factor, proline- and glutamine-rich OS=Homo sapiens GN=SFPQ PE=1 SV=2
P09493|TPM1_HUMAN	408	32746.2	1.192	1.1478	5	*	Tropomyosin alpha-1 chain OS=Homo sapiens GN=TPM1 PE=1 SV=2
Q16643|DREB_HUMAN	85	71842.1	1.19453		1		Drebrin OS=Homo sapiens GN=DBN1 PE=1 SV=4
P17661|DESM_HUMAN	1430	53560.7	1.19576	1.20597	17	*	Desmin OS=Homo sapiens GN=DES PE=1 SV=3
Q71DI3|H32_HUMAN	64	15436	1.20071	1.04404	2		Histone H3.2 OS=Homo sapiens GN=HIST2H3A PE=1 SV=3
P02545|LMNA_HUMAN	1482	74380.3	1.21393	1.2434	19	*	Lamin-A/C OS=Homo sapiens GN=LMNA PE=1 SV=1
P60709|ACTB_HUMAN	2339	42052.4	1.21878	1.16871	22	*	Actin, cytoplasmic 1 OS=Homo sapiens GN=ACTB PE=1 SV=1
Q7Z406|MYH14_HUMAN	159	228890	1.22798		1		Myosin-14 OS=Homo sapiens GN=MYH14 PE=1 SV=1
Q07666|KHDR1_HUMAN	132	48311.7	1.23595	1.02017	2	*	KH domain-containing, RNA-binding, signal transduction-associated protein 1 OS=Homo sapiens GN=KHDRBS1 PE=1 SV=1
Q15149|PLEC_HUMAN	297	533462	1.25019	1.26726	7	*	Plectin OS=Homo sapiens GN=PLEC PE=1 SV=3
P09651|ROA1_HUMAN	605	38837.6	1.27259	1.13022	4	*	Heterogeneous nuclear ribonucleoprotein A1 OS=Homo sapiens GN=HNRNPA1 PE=1 SV=5
P67936|TPM4_HUMAN	160	28619	1.27573	1.08178	2		Tropomyosin alpha-4 chain OS=Homo sapiens GN=TPM4 PE=1 SV=3
P0C0S8|H2A1_HUMAN	444	14083.5	1.28984	1.18413	4		Histone H2A type 1 OS=Homo sapiens GN=HIST1H2AG PE=1 SV=2
P18206|VINC_HUMAN	42	124293	1.29482		1		Vinculin OS=Homo sapiens GN=VCL PE=1 SV=4
Q9UKV3|ACINU_HUMAN	61	152196	1.30396		1		Apoptotic chromatin condensation inducer in the nucleus OS=Homo sapiens GN=ACIN1 PE=1 SV=1
Q9UHB6|LIMA1_HUMAN	57	85630	1.32747	1.12141	2		LIM domain and actin-binding protein 1 OS=Homo sapiens GN=LIMA1 PE=1 SV=1
P0C0S5|H2AZ_HUMAN	125	13545	1.3276	1.30074	2		Histone H2A.Z OS=Homo sapiens GN=H2AFZ PE=1 SV=2
Q9ULV4|COR1C_HUMAN	114	53899.8	1.34209	1.17293	2		Coronin-1C OS=Homo sapiens GN=CORO1C PE=1 SV=1
P35579|MYH9_HUMAN	3890	227647	1.36513	1.31283	43	*	Myosin-9 OS=Homo sapiens GN=MYH9 PE=1 SV=4
Q12905|ILF2_HUMAN	137	43263.8	1.36564		1		Interleukin enhancer-binding factor 2 OS=Homo sapiens GN=ILF2 PE=1 SV=2
P08670|VIME_HUMAN	1766	53676.6	1.39101	1.16564	16	*	Vimentin OS=Homo sapiens GN=VIM PE=1 SV=4
P60468|SC61B_HUMAN	146	10025.6	1.41334		1		Protein transport protein Sec61 subunit beta OS=Homo sapiens GN=SEC61B PE=1 SV=2
O14950|ML12B_HUMAN	523	19824	1.44085	1.00199	2	*	Myosin regulatory light chain 12B OS=Homo sapiens GN=MYL12B PE=1 SV=2
P21333|FLNA_HUMAN	735	283301	1.48787	1.22518	21	*	Filamin-A OS=Homo sapiens GN=FLNA PE=1 SV=4
P02751|FINC_HUMAN	978	266053	1.50505	1.11763	14	*	Fibronectin OS=Homo sapiens GN=FN1 PE=1 SV=4
Q05682|CALD1_HUMAN	696	93252	1.54413	1.25811	11	*	Caldesmon OS=Homo sapiens GN=CALD1 PE=1 SV=2
P60660|MYL6_HUMAN	318	17090.7	1.57137	1.01792	2	*	Myosin light polypeptide 6 OS=Homo sapiens GN=MYL6 PE=1 SV=2
P24844|MYL9_HUMAN	440	19872	1.69948		1		Myosin regulatory light polypeptide 9 OS=Homo sapiens GN=MYL9 PE=1 SV=4
P98160|PGBM_HUMAN	70	479221	1.82905		1		Basement membrane-specific heparan sulfate proteoglycan core protein OS=Homo sapiens GN=HSPG2 PE=1 SV=3
Q96IZ0|PAWR_HUMAN	55	36660	1.96662		1		PRKC apoptosis WT1 regulator protein OS=Homo sapiens GN=PAWR PE=1 SV=1
P07996|TSP1_HUMAN	38	133292	2.01558		1		Thrombospondin-1 OS=Homo sapiens GN=THBS1 PE=1 SV=2
