# Supplementary material for: FSHD Myotubes with Different Phenotypes Exhibit Distinct Proteomes
Source: PLoS One. 2012 Dec 18;7(12):e51865. doi: 10.1371/journal.pone.0051865 (PMC3525578; doi:10.1371/journal.pone.0051865)
Supplement: Table S10 — Raw data: analysis #dFSHD12_NE. (XLSX) [file pone.0051865.s014.xlsx]

## Sheet: dFSHD12_NE
Accession	Score	Mass	H/L	SD(geo)	#	T.Test	Description
O15075|DCLK1_HUMAN	91	82743.7	P		0		Serine/threonine-protein kinase DCLK1 OS=Homo sapiens GN=DCLK1 PE=1 SV=2
O60506|HNRPQ_HUMAN	38	69788.2	P		0		Heterogeneous nuclear ribonucleoprotein Q OS=Homo sapiens GN=SYNCRIP PE=1 SV=2
O60716|CTND1_HUMAN	41	108674	P		0		Catenin delta-1 OS=Homo sapiens GN=CTNND1 PE=1 SV=1
O75152|ZC11A_HUMAN	64	89931.8	P		0		Zinc finger CCCH domain-containing protein 11A OS=Homo sapiens GN=ZC3H11A PE=1 SV=3
O95810|SDPR_HUMAN	42	47202.1	P		0		Serum deprivation-response protein OS=Homo sapiens GN=SDPR PE=1 SV=3
P04406|G3P_HUMAN	69	36202	P		0		Glyceraldehyde-3-phosphate dehydrogenase OS=Homo sapiens GN=GAPDH PE=1 SV=3
P05997|CO5A2_HUMAN	38	145791	P		0		Collagen alpha-2(V) chain OS=Homo sapiens GN=COL5A2 PE=1 SV=3
P07355|ANXA2_HUMAN	112	38808.4	P		0		Annexin A2 OS=Homo sapiens GN=ANXA2 PE=1 SV=2
P13805|TNNT1_HUMAN	225	32985.4	P		0		Troponin T, slow skeletal muscle OS=Homo sapiens GN=TNNT1 PE=1 SV=4
P14618|KPYM_HUMAN	97	58470.7	P		0		Pyruvate kinase isozymes M1/M2 OS=Homo sapiens GN=PKM2 PE=1 SV=4
P16401|H15_HUMAN	119	22567	P		0		Histone H1.5 OS=Homo sapiens GN=HIST1H1B PE=1 SV=3
P17844|DDX5_HUMAN	50	69618.4	P		0		Probable ATP-dependent RNA helicase DDX5 OS=Homo sapiens GN=DDX5 PE=1 SV=1
P22087|FBRL_HUMAN	42	33878	P		0		rRNA 2'-O-methyltransferase fibrillarin OS=Homo sapiens GN=FBL PE=1 SV=2
P26641|EF1G_HUMAN	41	50429.8	P		0		Elongation factor 1-gamma OS=Homo sapiens GN=EEF1G PE=1 SV=3
P27816|MAP4_HUMAN	50	121444	P		0		Microtubule-associated protein 4 OS=Homo sapiens GN=MAP4 PE=1 SV=3
P35052|GPC1_HUMAN	46	62724.9	P		0		Glypican-1 OS=Homo sapiens GN=GPC1 PE=1 SV=2
P35659|DEK_HUMAN	38	42933.5	P		0		Protein DEK OS=Homo sapiens GN=DEK PE=1 SV=1
P45378|TNNT3_HUMAN	71	31805.9	P		0		Troponin T, fast skeletal muscle OS=Homo sapiens GN=TNNT3 PE=1 SV=3
P46782|RS5_HUMAN	54	23033.6	P		0		40S ribosomal protein S5 OS=Homo sapiens GN=RPS5 PE=1 SV=4
P47914|RL29_HUMAN	61	17798.6	P		0		60S ribosomal protein L29 OS=Homo sapiens GN=RPL29 PE=1 SV=2
P51659|DHB4_HUMAN	50	80093	P		0		Peroxisomal multifunctional enzyme type 2 OS=Homo sapiens GN=HSD17B4 PE=1 SV=3
P61981|1433G_HUMAN	60	28456.5	P		0		14-3-3 protein gamma OS=Homo sapiens GN=YWHAG PE=1 SV=2
P62158|CALM_HUMAN	66	16827.3	P		0		Calmodulin OS=Homo sapiens GN=CALM1 PE=1 SV=2
P62195|PRS8_HUMAN	41	45768.6	P		0		26S protease regulatory subunit 8 OS=Homo sapiens GN=PSMC5 PE=1 SV=1
P62249|RS16_HUMAN	40	16549.6	P		0		40S ribosomal protein S16 OS=Homo sapiens GN=RPS16 PE=1 SV=2
P62258|1433E_HUMAN	96	29327	P		0		14-3-3 protein epsilon OS=Homo sapiens GN=YWHAE PE=1 SV=1
P62318|SMD3_HUMAN	82	14021.9	P		0		Small nuclear ribonucleoprotein Sm D3 OS=Homo sapiens GN=SNRPD3 PE=1 SV=1
P62424|RL7A_HUMAN	49	30148.6	P		0		60S ribosomal protein L7a OS=Homo sapiens GN=RPL7A PE=1 SV=2
P62851|RS25_HUMAN	52	13791.2	P		0		40S ribosomal protein S25 OS=Homo sapiens GN=RPS25 PE=1 SV=1
P62906|RL10A_HUMAN	44	24987.1	P		0		60S ribosomal protein L10a OS=Homo sapiens GN=RPL10A PE=1 SV=2
P62910|RL32_HUMAN	61	15964.4	P		0		60S ribosomal protein L32 OS=Homo sapiens GN=RPL32 PE=1 SV=2
P62913|RL11_HUMAN	41	20468.2	P		0		60S ribosomal protein L11 OS=Homo sapiens GN=RPL11 PE=1 SV=2
P62979|RS27A_HUMAN	56	18296.1	P		0		Ubiquitin-40S ribosomal protein S27a OS=Homo sapiens GN=RPS27A PE=1 SV=2
P98160|PGBM_HUMAN	41	479221	P		0		Basement membrane-specific heparan sulfate proteoglycan core protein OS=Homo sapiens GN=HSPG2 PE=1 SV=3
Q00341|VIGLN_HUMAN	68	141996	P		0		Vigilin OS=Homo sapiens GN=HDLBP PE=1 SV=2
Q09666|AHNK_HUMAN	135	629213	P		0		Neuroblast differentiation-associated protein AHNAK OS=Homo sapiens GN=AHNAK PE=1 SV=2
Q0ZGT2|NEXN_HUMAN	41	80837.3	P		0		Nexilin OS=Homo sapiens GN=NEXN PE=1 SV=1
Q13203|MYBPH_HUMAN	79	52531.2	P		0		Myosin-binding protein H OS=Homo sapiens GN=MYBPH PE=2 SV=4
Q14151|SAFB2_HUMAN	49	107922	P		0		Scaffold attachment factor B2 OS=Homo sapiens GN=SAFB2 PE=1 SV=1
Q14764|MVP_HUMAN	133	99551.5	P		0		Major vault protein OS=Homo sapiens GN=MVP PE=1 SV=4
Q15911|ZFHX3_HUMAN	43	408841	P		0		Zinc finger homeobox protein 3 OS=Homo sapiens GN=ZFHX3 PE=1 SV=2
Q16181|SEPT7_HUMAN	40	50933.6	P		0		Septin-7 OS=Homo sapiens GN=SEPT7 PE=1 SV=2
Q16643|DREB_HUMAN	57	71842.1	P		0		Drebrin OS=Homo sapiens GN=DBN1 PE=1 SV=4
Q1KMD3|HNRL2_HUMAN	46	85622.9	P		0		Heterogeneous nuclear ribonucleoprotein U-like protein 2 OS=Homo sapiens GN=HNRNPUL2 PE=1 SV=1
Q5BKX8|MURC_HUMAN	44	41988.3	P		0		Muscle-related coiled-coil protein OS=Homo sapiens GN=MURC PE=1 SV=2
Q6U841|S4A10_HUMAN	37	127063	P		0		Sodium-driven chloride bicarbonate exchanger OS=Homo sapiens GN=SLC4A10 PE=1 SV=1
Q92522|H1X_HUMAN	43	22474	P		0		Histone H1x OS=Homo sapiens GN=H1FX PE=1 SV=1
Q92841|DDX17_HUMAN	42	72953.7	P		0		Probable ATP-dependent RNA helicase DDX17 OS=Homo sapiens GN=DDX17 PE=1 SV=1
Q92945|FUBP2_HUMAN	43	73443.7	P		0		Far upstream element-binding protein 2 OS=Homo sapiens GN=KHSRP PE=1 SV=3
Q9H361|PABP3_HUMAN	44	70215.3	P		0		Polyadenylate-binding protein 3 OS=Homo sapiens GN=PABPC3 PE=1 SV=2
Q9NR64|KLHL1_HUMAN	38	83767.6	P		0		Kelch-like protein 1 OS=Homo sapiens GN=KLHL1 PE=2 SV=1
Q9UKV3|ACINU_HUMAN	59	152196	P		0		Apoptotic chromatin condensation inducer in the nucleus OS=Homo sapiens GN=ACIN1 PE=1 SV=1
Q9UPN3|MACF1_HUMAN	69	623626	P		0		Microtubule-actin cross-linking factor 1, isoforms 1/2/3/5 OS=Homo sapiens GN=MACF1 PE=1 SV=3
Q9Y3U8|RL36_HUMAN	43	12303.4	P		0		60S ribosomal protein L36 OS=Homo sapiens GN=RPL36 PE=1 SV=3
Q9Y490|TLN1_HUMAN	82	271766	P		0		Talin-1 OS=Homo sapiens GN=TLN1 PE=1 SV=3
Q9Y2H5|PKHA6_HUMAN	41	117399	P		0		Pleckstrin homology domain-containing family A member 6 OS=Homo sapiens GN=PLEKHA6 PE=1 SV=4
Q53GG5|PDLI3_HUMAN	47	39835.2	0.631571		1		PDZ and LIM domain protein 3 OS=Homo sapiens GN=PDLIM3 PE=2 SV=1
P61247|RS3A_HUMAN	63	30154.3	0.676967		1		40S ribosomal protein S3a OS=Homo sapiens GN=RPS3A PE=1 SV=2
Q14980|NUMA1_HUMAN	67	239199	0.677409		1		Nuclear mitotic apparatus protein 1 OS=Homo sapiens GN=NUMA1 PE=1 SV=2
P80723|BASP1_HUMAN	84	22680.5	0.687478	1.22307	3		Brain acid soluble protein 1 OS=Homo sapiens GN=BASP1 PE=1 SV=2
P23284|PPIB_HUMAN	91	23785.1	0.699185		1		Peptidyl-prolyl cis-trans isomerase B OS=Homo sapiens GN=PPIB PE=1 SV=2
Q92743|HTRA1_HUMAN	121	52167.5	0.707912		1		Serine protease HTRA1 OS=Homo sapiens GN=HTRA1 PE=1 SV=1
Q8TDI0|CHD5_HUMAN	83	224506	0.726855		1		Chromodomain-helicase-DNA-binding protein 5 OS=Homo sapiens GN=CHD5 PE=1 SV=1
Q13435|SF3B2_HUMAN	91	100280	0.730814		1		Splicing factor 3B subunit 2 OS=Homo sapiens GN=SF3B2 PE=1 SV=2
P23246|SFPQ_HUMAN	293	76216.2	0.734139	1.00902	2	*	Splicing factor, proline- and glutamine-rich OS=Homo sapiens GN=SFPQ PE=1 SV=2
Q6WCQ1|MPRIP_HUMAN	110	117260	0.73471	1.26931	3		Myosin phosphatase Rho-interacting protein OS=Homo sapiens GN=MPRIP PE=1 SV=3
Q13263|TIF1B_HUMAN	86	90261.6	0.735663		1		Transcription intermediary factor 1-beta OS=Homo sapiens GN=TRIM28 PE=1 SV=5
Q00839|HNRPU_HUMAN	112	91269.8	0.739269		1		Heterogeneous nuclear ribonucleoprotein U OS=Homo sapiens GN=HNRNPU PE=1 SV=6
P62917|RL8_HUMAN	132	28235.9	0.746788		1		60S ribosomal protein L8 OS=Homo sapiens GN=RPL8 PE=1 SV=2
Q9H987|SYP2L_HUMAN	153	102703	0.748634	1.08476	2		Synaptopodin 2-like protein OS=Homo sapiens GN=SYNPO2L PE=2 SV=3
P13535|MYH8_HUMAN	1957	223594	0.75915	1.30405	4		Myosin-8 OS=Homo sapiens GN=MYH8 PE=1 SV=3
P78559|MAP1A_HUMAN	67	306923	0.763296		1		Microtubule-associated protein 1A OS=Homo sapiens GN=MAP1A PE=1 SV=5
Q15654|TRIP6_HUMAN	62	51738.5	0.766509		1		Thyroid receptor-interacting protein 6 OS=Homo sapiens GN=TRIP6 PE=1 SV=3
Q5JTV8|TOIP1_HUMAN	60	66379.8	0.794239		1		Torsin-1A-interacting protein 1 OS=Homo sapiens GN=TOR1AIP1 PE=1 SV=2
Q9UKM9|RALY_HUMAN	74	32501.1	0.795258		1		RNA-binding protein Raly OS=Homo sapiens GN=RALY PE=1 SV=1
P05386|RLA1_HUMAN	79	11621.2	0.796013		1		60S acidic ribosomal protein P1 OS=Homo sapiens GN=RPLP1 PE=1 SV=1
Q9BX66|SRBS1_HUMAN	65	142866	0.796467		1		Sorbin and SH3 domain-containing protein 1 OS=Homo sapiens GN=SORBS1 PE=1 SV=2
P31946|1433B_HUMAN	49	28179.4	0.8		1		14-3-3 protein beta/alpha OS=Homo sapiens GN=YWHAB PE=1 SV=3
Q9ULV4|COR1C_HUMAN	101	53899.8	0.80181	1.02769	2		Coronin-1C OS=Homo sapiens GN=CORO1C PE=1 SV=1
P35579|MYH9_HUMAN	3425	227647	0.804292	1.34616	36	*	Myosin-9 OS=Homo sapiens GN=MYH9 PE=1 SV=4
Q8TD47|RS4Y2_HUMAN	45	29619.5	0.809766	1.07632	2		40S ribosomal protein S4, Y isoform 2 OS=Homo sapiens GN=RPS4Y2 PE=1 SV=3
Q9NR12|PDLI7_HUMAN	142	50896.5	0.814529	1.1254	2		PDZ and LIM domain protein 7 OS=Homo sapiens GN=PDLIM7 PE=1 SV=1
Q14240|IF4A2_HUMAN	80	46601.4	0.819272		1		Eukaryotic initiation factor 4A-II OS=Homo sapiens GN=EIF4A2 PE=1 SV=2
Q08211|DHX9_HUMAN	97	142181	0.820041	1.10617	2		ATP-dependent RNA helicase A OS=Homo sapiens GN=DHX9 PE=1 SV=4
P63316|TNNC1_HUMAN	133	18505.1	0.84095		1		Troponin C, slow skeletal and cardiac muscles OS=Homo sapiens GN=TNNC1 PE=1 SV=1
Q96QR8|PURB_HUMAN	45	33392	0.842829		1		Transcriptional activator protein Pur-beta OS=Homo sapiens GN=PURB PE=1 SV=3
P17987|TCPA_HUMAN	75	60819.3	0.843059		1		T-complex protein 1 subunit alpha OS=Homo sapiens GN=TCP1 PE=1 SV=1
Q03252|LMNB2_HUMAN	188	67762	0.852664	1.23726	3		Lamin-B2 OS=Homo sapiens GN=LMNB2 PE=1 SV=3
P20700|LMNB1_HUMAN	73	66653.2	0.855508	1.27497	3		Lamin-B1 OS=Homo sapiens GN=LMNB1 PE=1 SV=2
Q12905|ILF2_HUMAN	92	43263.8	0.858307		1		Interleukin enhancer-binding factor 2 OS=Homo sapiens GN=ILF2 PE=1 SV=2
O43242|PSMD3_HUMAN	59	61054	0.863042		1		26S proteasome non-ATPase regulatory subunit 3 OS=Homo sapiens GN=PSMD3 PE=1 SV=2
P78527|PRKDC_HUMAN	37	473749	0.874366		1		DNA-dependent protein kinase catalytic subunit OS=Homo sapiens GN=PRKDC PE=1 SV=3
P30050|RL12_HUMAN	220	17979.1	0.875452		1		60S ribosomal protein L12 OS=Homo sapiens GN=RPL12 PE=1 SV=1
P55795|HNRH2_HUMAN	180	49517.9	0.885013		1		Heterogeneous nuclear ribonucleoprotein H2 OS=Homo sapiens GN=HNRNPH2 PE=1 SV=1
Q13813|SPTA2_HUMAN	750	285163	0.88624	1.27769	9		Spectrin alpha chain, brain OS=Homo sapiens GN=SPTAN1 PE=1 SV=3
Q8NHW5|RLA0L_HUMAN	69	34514.3	0.886743	1.1476	2		60S acidic ribosomal protein P0-like OS=Homo sapiens PE=1 SV=1
O14974|MYPT1_HUMAN	72	115611	0.89259		1		Protein phosphatase 1 regulatory subunit 12A OS=Homo sapiens GN=PPP1R12A PE=1 SV=1
P05976|MYL1_HUMAN	223	21189.3	0.892606	1.11014	2		Myosin light chain 1/3, skeletal muscle isoform OS=Homo sapiens GN=MYL1 PE=1 SV=3
O75112|LDB3_HUMAN	54	78226.9	0.895351	1.11361	2		LIM domain-binding protein 3 OS=Homo sapiens GN=LDB3 PE=1 SV=2
Q12906|ILF3_HUMAN	55	95678.7	0.896018		1		Interleukin enhancer-binding factor 3 OS=Homo sapiens GN=ILF3 PE=1 SV=3
P61978|HNRPK_HUMAN	273	51230	0.89722	1.30212	5		Heterogeneous nuclear ribonucleoprotein K OS=Homo sapiens GN=HNRNPK PE=1 SV=1
Q6PEY2|TBA3E_HUMAN	272	50568.3	0.914193		1		Tubulin alpha-3E chain OS=Homo sapiens GN=TUBA3E PE=1 SV=2
Q9UHB6|LIMA1_HUMAN	67	85630	0.916814		1		LIM domain and actin-binding protein 1 OS=Homo sapiens GN=LIMA1 PE=1 SV=1
P67809|YBOX1_HUMAN	272	35903.2	0.917127	1.27954	6		Nuclease-sensitive element-binding protein 1 OS=Homo sapiens GN=YBX1 PE=1 SV=3
P46063|RECQ1_HUMAN	107	74436.9	0.917484		1		ATP-dependent DNA helicase Q1 OS=Homo sapiens GN=RECQL PE=1 SV=3
P11142|HSP7C_HUMAN	470	71082.8	0.918223	1.1702	5		Heat shock cognate 71 kDa protein OS=Homo sapiens GN=HSPA8 PE=1 SV=1
Q8IY57|YAF2_HUMAN	123	20117.5	0.91927		1		YY1-associated factor 2 OS=Homo sapiens GN=YAF2 PE=1 SV=3
Q16186|ADRM1_HUMAN	66	42412.4	0.920983		1		Proteasomal ubiquitin receptor ADRM1 OS=Homo sapiens GN=ADRM1 PE=1 SV=2
Q96IZ0|PAWR_HUMAN	114	36660	0.923964		1		PRKC apoptosis WT1 regulator protein OS=Homo sapiens GN=PAWR PE=1 SV=1
O94875|SRBS2_HUMAN	65	125171	0.925063		1		Sorbin and SH3 domain-containing protein 2 OS=Homo sapiens GN=SORBS2 PE=1 SV=3
Q5QNW6|H2B2F_HUMAN	220	13912.1	0.926612	1.17681	5		Histone H2B type 2-F OS=Homo sapiens GN=HIST2H2BF PE=1 SV=3
P52597|HNRPF_HUMAN	238	45985.5	0.929235		1		Heterogeneous nuclear ribonucleoprotein F OS=Homo sapiens GN=HNRNPF PE=1 SV=3
P68371|TBB2C_HUMAN	314	50255.7	0.929761	1.12894	7		Tubulin beta-2C chain OS=Homo sapiens GN=TUBB2C PE=1 SV=1
P62263|RS14_HUMAN	98	16434.1	0.935275		1		40S ribosomal protein S14 OS=Homo sapiens GN=RPS14 PE=1 SV=3
P0C0S8|H2A1_HUMAN	269	14083.5	0.9365	1.26756	2		Histone H2A type 1 OS=Homo sapiens GN=HIST1H2AG PE=1 SV=2
Q6P2Q9|PRP8_HUMAN	41	274739	0.939592		1		Pre-mRNA-processing-splicing factor 8 OS=Homo sapiens GN=PRPF8 PE=1 SV=2
P48681|NEST_HUMAN	2362	177789	0.94092	1.25215	27		Nestin OS=Homo sapiens GN=NES PE=1 SV=2
P61254|RL26_HUMAN	58	17248	0.944596	1.10953	2		60S ribosomal protein L26 OS=Homo sapiens GN=RPL26 PE=1 SV=1
O00567|NOP56_HUMAN	140	66408.4	0.945367	1.08323	2		Nucleolar protein 56 OS=Homo sapiens GN=NOP56 PE=1 SV=4
P52272|HNRPM_HUMAN	204	77749.9	0.946699	1.18495	5		Heterogeneous nuclear ribonucleoprotein M OS=Homo sapiens GN=HNRNPM PE=1 SV=3
P60660|MYL6_HUMAN	356	17090.7	0.947078	1.17691	2		Myosin light polypeptide 6 OS=Homo sapiens GN=MYL6 PE=1 SV=2
P19237|TNNI1_HUMAN	314	21850.1	0.948612	1.27523	5		Troponin I, slow skeletal muscle OS=Homo sapiens GN=TNNI1 PE=1 SV=3
Q702N8|XIRP1_HUMAN	974	199637	0.953469	1.21388	15		Xin actin-binding repeat-containing protein 1 OS=Homo sapiens GN=XIRP1 PE=1 SV=1
Q07065|CKAP4_HUMAN	128	66097.3	0.956606		1		Cytoskeleton-associated protein 4 OS=Homo sapiens GN=CKAP4 PE=1 SV=2
Q9UNF1|MAGD2_HUMAN	77	65085.9	0.960596		1		Melanoma-associated antigen D2 OS=Homo sapiens GN=MAGED2 PE=1 SV=2
P43243|MATR3_HUMAN	72	95078.5	0.962149		1		Matrin-3 OS=Homo sapiens GN=MATR3 PE=1 SV=2
Q9Y696|CLIC4_HUMAN	50	28982.3	0.962236		1		Chloride intracellular channel protein 4 OS=Homo sapiens GN=CLIC4 PE=1 SV=4
P02452|CO1A1_HUMAN	869	139883	0.964937	1.29048	19		Collagen alpha-1(I) chain OS=Homo sapiens GN=COL1A1 PE=1 SV=5
Q92499|DDX1_HUMAN	53	83349.6	0.969069		1		ATP-dependent RNA helicase DDX1 OS=Homo sapiens GN=DDX1 PE=1 SV=2
Q3ZCM7|TBB8_HUMAN	109	50257.6	0.973313	1.09414	4		Tubulin beta-8 chain OS=Homo sapiens GN=TUBB8 PE=1 SV=2
P35609|ACTN2_HUMAN	1107	104359	0.974399	1.32758	16		Alpha-actinin-2 OS=Homo sapiens GN=ACTN2 PE=1 SV=1
O76021|RL1D1_HUMAN	105	55167.5	0.975739	1.19156	2		Ribosomal L1 domain-containing protein 1 OS=Homo sapiens GN=RSL1D1 PE=1 SV=3
P08123|CO1A2_HUMAN	383	129749	0.98318	1.25188	5		Collagen alpha-2(I) chain OS=Homo sapiens GN=COL1A2 PE=1 SV=7
P04075|ALDOA_HUMAN	37	39852	0.993503		1		Fructose-bisphosphate aldolase A OS=Homo sapiens GN=ALDOA PE=1 SV=2
Q02878|RL6_HUMAN	170	32765.2	0.993939		1		60S ribosomal protein L6 OS=Homo sapiens GN=RPL6 PE=1 SV=3
P05114|HMGN1_HUMAN	60	10653.1	1		1		Non-histone chromosomal protein HMG-14 OS=Homo sapiens GN=HMGN1 PE=1 SV=3
P21333|FLNA_HUMAN	1090	283301	1.00153	1.34138	16		Filamin-A OS=Homo sapiens GN=FLNA PE=1 SV=4
P14866|HNRPL_HUMAN	132	64720.1	1.00229	1.54514	2		Heterogeneous nuclear ribonucleoprotein L OS=Homo sapiens GN=HNRNPL PE=1 SV=2
P31943|HNRH1_HUMAN	269	49484	1.00609	1.19882	2		Heterogeneous nuclear ribonucleoprotein H OS=Homo sapiens GN=HNRNPH1 PE=1 SV=4
Q8IUE6|H2A2B_HUMAN	96	13987.3	1.00666	1.14445	2		Histone H2A type 2-B OS=Homo sapiens GN=HIST2H2AB PE=1 SV=3
O43707|ACTN4_HUMAN	1148	105245	1.00915	1.23916	20		Alpha-actinin-4 OS=Homo sapiens GN=ACTN4 PE=1 SV=2
P07910|HNRPC_HUMAN	121	33707.1	1.01173		1		Heterogeneous nuclear ribonucleoproteins C1/C2 OS=Homo sapiens GN=HNRNPC PE=1 SV=4
Q13409|DC1I2_HUMAN	84	71811.8	1.0133		1		Cytoplasmic dynein 1 intermediate chain 2 OS=Homo sapiens GN=DYNC1I2 PE=1 SV=3
Q15233|NONO_HUMAN	48	54311.8	1.0138	1.08424	2		Non-POU domain-containing octamer-binding protein OS=Homo sapiens GN=NONO PE=1 SV=4
P46777|RL5_HUMAN	97	34569.3	1.01523		1		60S ribosomal protein L5 OS=Homo sapiens GN=RPL5 PE=1 SV=3
P22626|ROA2_HUMAN	447	37464.2	1.01569	1.36841	3		Heterogeneous nuclear ribonucleoproteins A2/B1 OS=Homo sapiens GN=HNRNPA2B1 PE=1 SV=2
P10412|H14_HUMAN	141	21852.5	1.01932	1.01778	2		Histone H1.4 OS=Homo sapiens GN=HIST1H1E PE=1 SV=2
Q9UHD8|SEPT9_HUMAN	66	65646.4	1.02017		1		Septin-9 OS=Homo sapiens GN=SEPT9 PE=1 SV=2
Q8WZ42|TITIN_HUMAN	973	3.84312e+06	1.02495	1.32242	31		Titin OS=Homo sapiens GN=TTN PE=1 SV=2
P18124|RL7_HUMAN	48	29264.7	1.02565	1.22726	3		60S ribosomal protein L7 OS=Homo sapiens GN=RPL7 PE=1 SV=1
Q15942|ZYX_HUMAN	49	62436.1	1.02784		1		Zyxin OS=Homo sapiens GN=ZYX PE=1 SV=1
P12814|ACTN1_HUMAN	1438	103563	1.03127	1.32021	22		Alpha-actinin-1 OS=Homo sapiens GN=ACTN1 PE=1 SV=2
P06748|NPM_HUMAN	258	32726.4	1.03155	1.0922	3		Nucleophosmin OS=Homo sapiens GN=NPM1 PE=1 SV=2
P12883|MYH7_HUMAN	1720	223758	1.03188	1.1464	5		Myosin-7 OS=Homo sapiens GN=MYH7 PE=1 SV=5
Q96AE4|FUBP1_HUMAN	69	67690	1.03557		1		Far upstream element-binding protein 1 OS=Homo sapiens GN=FUBP1 PE=1 SV=3
Q8WWI1|LMO7_HUMAN	246	194016	1.04053	1.09778	3		LIM domain only protein 7 OS=Homo sapiens GN=LMO7 PE=1 SV=2
P26373|RL13_HUMAN	117	24304	1.04088		1		60S ribosomal protein L13 OS=Homo sapiens GN=RPL13 PE=1 SV=4
Q5VTE0|EF1A3_HUMAN	244	50495.8	1.04344	1.0153	2		Putative elongation factor 1-alpha-like 3 OS=Homo sapiens GN=EEF1AL3 PE=5 SV=1
P09651|ROA1_HUMAN	597	38837.6	1.04468	1.16999	3		Heterogeneous nuclear ribonucleoprotein A1 OS=Homo sapiens GN=HNRNPA1 PE=1 SV=5
Q15149|PLEC_HUMAN	354	533462	1.04799	1.09595	3		Plectin OS=Homo sapiens GN=PLEC PE=1 SV=3
P09493|TPM1_HUMAN	351	32746.2	1.04965	1.30421	6		Tropomyosin alpha-1 chain OS=Homo sapiens GN=TPM1 PE=1 SV=2
Q05682|CALD1_HUMAN	752	93252	1.05804	1.29416	9		Caldesmon OS=Homo sapiens GN=CALD1 PE=1 SV=2
P50914|RL14_HUMAN	63	23531.6	1.05817		1		60S ribosomal protein L14 OS=Homo sapiens GN=RPL14 PE=1 SV=4
P50454|SERPH_HUMAN	65	46525.7	1.06231		1		Serpin H1 OS=Homo sapiens GN=SERPINH1 PE=1 SV=2
P17661|DESM_HUMAN	1793	53560.7	1.06266	1.35405	19		Desmin OS=Homo sapiens GN=DES PE=1 SV=3
P02545|LMNA_HUMAN	1935	74380.3	1.06523	1.25813	20		Lamin-A/C OS=Homo sapiens GN=LMNA PE=1 SV=1
P24844|MYL9_HUMAN	319	19872	1.06548		1		Myosin regulatory light polypeptide 9 OS=Homo sapiens GN=MYL9 PE=1 SV=4
P05387|RLA2_HUMAN	221	11658.4	1.06731		1		60S acidic ribosomal protein P2 OS=Homo sapiens GN=RPLP2 PE=1 SV=1
P35637|FUS_HUMAN	74	53622.4	1.06971	1.0574	2		RNA-binding protein FUS OS=Homo sapiens GN=FUS PE=1 SV=1
Q6NZI2|PTRF_HUMAN	145	43450.3	1.07367		1		Polymerase I and transcript release factor OS=Homo sapiens GN=PTRF PE=1 SV=1
P18621|RL17_HUMAN	60	21611.9	1.07378		1		60S ribosomal protein L17 OS=Homo sapiens GN=RPL17 PE=1 SV=3
P02751|FINC_HUMAN	1169	266053	1.07431	1.26769	18		Fibronectin OS=Homo sapiens GN=FN1 PE=1 SV=4
Q14315|FLNC_HUMAN	945	293407	1.07478	1.29659	20		Filamin-C OS=Homo sapiens GN=FLNC PE=1 SV=3
P51991|ROA3_HUMAN	261	39799.2	1.08114	1.18433	4		Heterogeneous nuclear ribonucleoprotein A3 OS=Homo sapiens GN=HNRNPA3 PE=1 SV=2
Q15459|SF3A1_HUMAN	59	88888	1.08409		1		Splicing factor 3A subunit 1 OS=Homo sapiens GN=SF3A1 PE=1 SV=1
Q07666|KHDR1_HUMAN	50	48311.7	1.09017		1		KH domain-containing, RNA-binding, signal transduction-associated protein 1 OS=Homo sapiens GN=KHDRBS1 PE=1 SV=1
P07951|TPM2_HUMAN	385	32945.1	1.09253	1.2716	8		Tropomyosin beta chain OS=Homo sapiens GN=TPM2 PE=1 SV=1
P62805|H4_HUMAN	408	11360.9	1.09813	1.29625	7		Histone H4 OS=Homo sapiens GN=HIST1H4A PE=1 SV=2
P38159|HNRPG_HUMAN	89	42306.8	1.10096	1.2119	3		Heterogeneous nuclear ribonucleoprotein G OS=Homo sapiens GN=RBMX PE=1 SV=3
P0C0S5|H2AZ_HUMAN	77	13545	1.10744		1		Histone H2A.Z OS=Homo sapiens GN=H2AFZ PE=1 SV=2
Q71DI3|H32_HUMAN	62	15436	1.12101		1		Histone H3.2 OS=Homo sapiens GN=HIST2H3A PE=1 SV=3
P11055|MYH3_HUMAN	4961	224850	1.12548	1.26368	40	*	Myosin-3 OS=Homo sapiens GN=MYH3 PE=1 SV=3
Q9UKX2|MYH2_HUMAN	2102	223933	1.12592	1.13756	3		Myosin-2 OS=Homo sapiens GN=MYH2 PE=1 SV=1
P02461|CO3A1_HUMAN	86	139734	1.12734	1.29215	2		Collagen alpha-1(III) chain OS=Homo sapiens GN=COL3A1 PE=1 SV=4
Q9UMS6|SYNP2_HUMAN	275	118069	1.13748	1.30687	5		Synaptopodin-2 OS=Homo sapiens GN=SYNPO2 PE=1 SV=2
Q8WX93|PALLD_HUMAN	133	151812	1.15984	1.13427	5		Palladin OS=Homo sapiens GN=PALLD PE=1 SV=2
P19105|ML12A_HUMAN	408	19839	1.16091		1		Myosin regulatory light chain 12A OS=Homo sapiens GN=MYL12A PE=1 SV=2
Q16527|CSRP2_HUMAN	69	21852.7	1.16459		1		Cysteine and glycine-rich protein 2 OS=Homo sapiens GN=CSRP2 PE=1 SV=3
Q00610|CLH1_HUMAN	73	193261	1.17158		1		Clathrin heavy chain 1 OS=Homo sapiens GN=CLTC PE=1 SV=5
P62829|RL23_HUMAN	53	14970.6	1.17237		1		60S ribosomal protein L23 OS=Homo sapiens GN=RPL23 PE=1 SV=1
Q9NVA2|SEP11_HUMAN	169	49652.8	1.22545		1		Septin-11 OS=Homo sapiens GN=SEPT11 PE=1 SV=3
P45379|TNNT2_HUMAN	382	35902.4	1.22854	1.24823	5		Troponin T, cardiac muscle OS=Homo sapiens GN=TNNT2 PE=1 SV=3
P36578|RL4_HUMAN	107	47953	1.23003	1.15704	3		60S ribosomal protein L4 OS=Homo sapiens GN=RPL4 PE=1 SV=5
P08670|VIME_HUMAN	1709	53676.6	1.23688	1.23502	14	*	Vimentin OS=Homo sapiens GN=VIM PE=1 SV=4
Q01082|SPTB2_HUMAN	317	275237	1.24022	1.0922	4	*	Spectrin beta chain, brain 1 OS=Homo sapiens GN=SPTBN1 PE=1 SV=2
P14649|MYL6B_HUMAN	382	22864.2	1.24408	1.15178	2		Myosin light chain 6B OS=Homo sapiens GN=MYL6B PE=1 SV=1
Q96A32|MLRS_HUMAN	177	19117	1.28884		1		Myosin regulatory light chain 2, skeletal muscle isoform OS=Homo sapiens GN=MYLPF PE=2 SV=1
Q9UMS4|PRP19_HUMAN	83	55603	1.31749		1		Pre-mRNA-processing factor 19 OS=Homo sapiens GN=PRPF19 PE=1 SV=1
Q9UDY4|DNJB4_HUMAN	49	38011.7	1.32918		1		DnaJ homolog subfamily B member 4 OS=Homo sapiens GN=DNAJB4 PE=1 SV=1
P12829|MYL4_HUMAN	333	21665.4	1.371	1.19349	3		Myosin light chain 4 OS=Homo sapiens GN=MYL4 PE=1 SV=3
Q6ZNE9|RUFY4_HUMAN	52	65393.2	1.39		1		RUN and FYVE domain-containing protein 4 OS=Homo sapiens GN=RUFY4 PE=2 SV=2
P68032|ACTC_HUMAN	3544	42334.5	1.39313	1.42636	25	*	Actin, alpha cardiac muscle 1 OS=Homo sapiens GN=ACTC1 PE=1 SV=1
P60468|SC61B_HUMAN	79	10025.6	1.4		1		Protein transport protein Sec61 subunit beta OS=Homo sapiens GN=SEC61B PE=1 SV=2
P60709|ACTB_HUMAN	2986	42052.4	1.41287	1.43082	21	*	Actin, cytoplasmic 1 OS=Homo sapiens GN=ACTB PE=1 SV=1
Q13151|ROA0_HUMAN	39	30993.3	1.47407		1		Heterogeneous nuclear ribonucleoprotein A0 OS=Homo sapiens GN=HNRNPA0 PE=1 SV=1
Q9C0B9|ZCHC2_HUMAN	43	126999	9.72439		1		Zinc finger CCHC domain-containing protein 2 OS=Homo sapiens GN=ZCCHC2 PE=1 SV=6
