# Supplementary material for: FSHD Myotubes with Different Phenotypes Exhibit Distinct Proteomes
Source: PLoS One. 2012 Dec 18;7(12):e51865. doi: 10.1371/journal.pone.0051865 (PMC3525578; doi:10.1371/journal.pone.0051865)
Supplement: Table S11 — Raw data: analysis #CTL7_TE. (XLSX) [file pone.0051865.s015.xlsx]

## Sheet: CTL7_TE
Accession	Score	Mass	H/L	SD(geo)	#	Bold	Description
A7E2Y1|MYH7B_HUMAN	174	222392	0	0	0		Myosin-7B OS=Homo sapiens GN=MYH7B PE=2 SV=3
O00499|BIN1_HUMAN	60	64888	0	0	0		Myc box-dependent-interacting protein 1 OS=Homo sapiens GN=BIN1 PE=1 SV=1
O43707|ACTN4_HUMAN	216	105245	0	0	0		Alpha-actinin-4 OS=Homo sapiens GN=ACTN4 PE=1 SV=2
O75923|DYSF_HUMAN	119	239254	0	0	0		Dysferlin OS=Homo sapiens GN=DYSF PE=1 SV=1
O95810|SDPR_HUMAN	48	47202.1	0	0	0		Serum deprivation-response protein OS=Homo sapiens GN=SDPR PE=1 SV=3
P05556|ITB1_HUMAN	74	91664.8	0	0	0		Integrin beta-1 OS=Homo sapiens GN=ITGB1 PE=1 SV=2
P05976|MYL1_HUMAN	109	21189.3	0	0	0		Myosin light chain 1/3, skeletal muscle isoform OS=Homo sapiens GN=MYL1 PE=1 SV=3
P06576|ATPB_HUMAN	65	56525.1	0	0	0		ATP synthase subunit beta, mitochondrial OS=Homo sapiens GN=ATP5B PE=1 SV=3
P07437|TBB5_HUMAN	127	50095.6	0	0	0		Tubulin beta chain OS=Homo sapiens GN=TUBB PE=1 SV=2
P08621|RU17_HUMAN	39	51583.3	0	0	0		U1 small nuclear ribonucleoprotein 70 kDa OS=Homo sapiens GN=SNRNP70 PE=1 SV=2
P09651|ROA1_HUMAN	40	38837.6	0	0	0		Heterogeneous nuclear ribonucleoprotein A1 OS=Homo sapiens GN=HNRNPA1 PE=1 SV=5
P10632|CP2C8_HUMAN	39	56587.5	0	0	0		Cytochrome P450 2C8 OS=Homo sapiens GN=CYP2C8 PE=1 SV=2
P10916|MLRV_HUMAN	79	18777.9	0	0	0		Myosin regulatory light chain 2, ventricular/cardiac muscle isoform OS=Homo sapiens GN=MYL2 PE=1 SV=3
P11142|HSP7C_HUMAN	66	71082.8	0	0	0		Heat shock cognate 71 kDa protein OS=Homo sapiens GN=HSPA8 PE=1 SV=1
P12277|KCRB_HUMAN	82	42902.9	0	0	0		Creatine kinase B-type OS=Homo sapiens GN=CKB PE=1 SV=1
P12814|ACTN1_HUMAN	115	103563	0	0	0		Alpha-actinin-1 OS=Homo sapiens GN=ACTN1 PE=1 SV=2
P12829|MYL4_HUMAN	130	21665.4	0	0	0		Myosin light chain 4 OS=Homo sapiens GN=MYL4 PE=1 SV=3
P12882|MYH1_HUMAN	661	223976	0	0	0		Myosin-1 OS=Homo sapiens GN=MYH1 PE=1 SV=3
P13533|MYH6_HUMAN	653	224395	0	0	0		Myosin-6 OS=Homo sapiens GN=MYH6 PE=1 SV=5
P13535|MYH8_HUMAN	590	223594	0	0	0		Myosin-8 OS=Homo sapiens GN=MYH8 PE=1 SV=3
P13591|NCAM1_HUMAN	49	95371	0	0	0		Neural cell adhesion molecule 1 OS=Homo sapiens GN=NCAM1 PE=1 SV=3
P14649|MYL6B_HUMAN	160	22864.2	0	0	0		Myosin light chain 6B OS=Homo sapiens GN=MYL6B PE=1 SV=1
P22626|ROA2_HUMAN	94	37464.2	0	0	0		Heterogeneous nuclear ribonucleoproteins A2/B1 OS=Homo sapiens GN=HNRNPA2B1 PE=1 SV=2
P28799|GRN_HUMAN	99	68518.2	0	0	0		Granulins OS=Homo sapiens GN=GRN PE=1 SV=2
P30101|PDIA3_HUMAN	62	57146.4	0	0	0		Protein disulfide-isomerase A3 OS=Homo sapiens GN=PDIA3 PE=1 SV=4
P30837|AL1B1_HUMAN	68	57626.9	0	0	0		Aldehyde dehydrogenase X, mitochondrial OS=Homo sapiens GN=ALDH1B1 PE=1 SV=3
P31930|QCR1_HUMAN	64	53297.2	0	0	0		Cytochrome b-c1 complex subunit 1, mitochondrial OS=Homo sapiens GN=UQCRC1 PE=1 SV=3
P31943|HNRH1_HUMAN	156	49484	0	0	0		Heterogeneous nuclear ribonucleoprotein H OS=Homo sapiens GN=HNRNPH1 PE=1 SV=4
P31946|1433B_HUMAN	107	28179.4	0	0	0		14-3-3 protein beta/alpha OS=Homo sapiens GN=YWHAB PE=1 SV=3
P34931|HS71L_HUMAN	48	70731	0	0	0		Heat shock 70 kDa protein 1-like OS=Homo sapiens GN=HSPA1L PE=1 SV=2
P35579|MYH9_HUMAN	193	227647	0	0	0		Myosin-9 OS=Homo sapiens GN=MYH9 PE=1 SV=4
P38646|GRP75_HUMAN	80	73920.4	0	0	0		Stress-70 protein, mitochondrial OS=Homo sapiens GN=HSPA9 PE=1 SV=2
P45378|TNNT3_HUMAN	96	31805.9	0	0	0		Troponin T, fast skeletal muscle OS=Homo sapiens GN=TNNT3 PE=1 SV=3
P45379|TNNT2_HUMAN	162	35902.4	0	0	0		Troponin T, cardiac muscle OS=Homo sapiens GN=TNNT2 PE=1 SV=3
P45880|VDAC2_HUMAN	61	32060.2	0	0	0		Voltage-dependent anion-selective channel protein 2 OS=Homo sapiens GN=VDAC2 PE=1 SV=2
P49023|PAXI_HUMAN	41	65946.9	0	0	0		Paxillin OS=Homo sapiens GN=PXN PE=1 SV=3
P50454|SERPH_HUMAN	150	46525.7	0	0	0		Serpin H1 OS=Homo sapiens GN=SERPINH1 PE=1 SV=2
P54652|HSP72_HUMAN	66	70263.5	0	0	0		Heat shock-related 70 kDa protein 2 OS=Homo sapiens GN=HSPA2 PE=1 SV=1
P56539|CAV3_HUMAN	39	17761.5	0	0	0		Caveolin-3 OS=Homo sapiens GN=CAV3 PE=1 SV=1
P58107|EPIPL_HUMAN	95	557674	0	0	0		Epiplakin OS=Homo sapiens GN=EPPK1 PE=1 SV=2
P60174|TPIS_HUMAN	69	31057.3	0	0	0		Triosephosphate isomerase OS=Homo sapiens GN=TPI1 PE=1 SV=3
P60842|IF4A1_HUMAN	59	46353.1	0	0	0		Eukaryotic initiation factor 4A-I OS=Homo sapiens GN=EIF4A1 PE=1 SV=1
P60903|S10AA_HUMAN	92	11310	0	0	0		Protein S100-A10 OS=Homo sapiens GN=S100A10 PE=1 SV=2
P62273|RS29_HUMAN	43	6900.89	0	0	0		40S ribosomal protein S29 OS=Homo sapiens GN=RPS29 PE=1 SV=2
P62805|H4_HUMAN	98	11360.9	0	0	0		Histone H4 OS=Homo sapiens GN=HIST1H4A PE=1 SV=2
P63316|TNNC1_HUMAN	103	18505.1	0	0	0		Troponin C, slow skeletal and cardiac muscles OS=Homo sapiens GN=TNNC1 PE=1 SV=1
Q00839|HNRPU_HUMAN	119	91269.8	0	0	0		Heterogeneous nuclear ribonucleoprotein U OS=Homo sapiens GN=HNRNPU PE=1 SV=6
Q13509|TBB3_HUMAN	107	50856.9	0	0	0		Tubulin beta-3 chain OS=Homo sapiens GN=TUBB3 PE=1 SV=2
Q14240|IF4A2_HUMAN	55	46601.4	0	0	0		Eukaryotic initiation factor 4A-II OS=Homo sapiens GN=EIF4A2 PE=1 SV=2
Q15149|PLEC_HUMAN	188	533462	0	0	0		Plectin OS=Homo sapiens GN=PLEC PE=1 SV=3
Q15327|ANKR1_HUMAN	38	36514.7	0	0	0		Ankyrin repeat domain-containing protein 1 OS=Homo sapiens GN=ANKRD1 PE=1 SV=2
Q16643|DREB_HUMAN	87	71842.1	0	0	0		Drebrin OS=Homo sapiens GN=DBN1 PE=1 SV=4
Q702N8|XIRP1_HUMAN	39	199637	0	0	0		Xin actin-binding repeat-containing protein 1 OS=Homo sapiens GN=XIRP1 PE=1 SV=1
Q96MG2|JSPR1_HUMAN	110	36468.3	0	0	0		Junctional sarcoplasmic reticulum protein 1 OS=Homo sapiens GN=JSRP1 PE=2 SV=1
Q9BSJ8|ESYT1_HUMAN	88	123294	0	0	0		Extended synaptotagmin-1 OS=Homo sapiens GN=ESYT1 PE=1 SV=1
Q9BVA1|TBB2B_HUMAN	118	50377.6	0	0	0		Tubulin beta-2B chain OS=Homo sapiens GN=TUBB2B PE=1 SV=1
Q9H3P7|GCP60_HUMAN	121	60841.6	0	0	0		Golgi resident protein GCP60 OS=Homo sapiens GN=ACBD3 PE=1 SV=4
Q9H853|TBA4B_HUMAN	78	27819.3	0	0	0		Putative tubulin-like protein alpha-4B OS=Homo sapiens GN=TUBA4B PE=5 SV=2
Q9H987|SYP2L_HUMAN	112	102703	0	0	0		Synaptopodin 2-like protein OS=Homo sapiens GN=SYNPO2L PE=2 SV=3
Q9NQC3|RTN4_HUMAN	94	130251	0	0	0		Reticulon-4 OS=Homo sapiens GN=RTN4 PE=1 SV=2
Q9NYK1|TLR7_HUMAN	38	122385	0	0	0		Toll-like receptor 7 OS=Homo sapiens GN=TLR7 PE=1 SV=1
Q9UKX2|MYH2_HUMAN	619	223933	0	0	0		Myosin-2 OS=Homo sapiens GN=MYH2 PE=1 SV=1
Q9UKX3|MYH13_HUMAN	421	224606	0	0	0		Myosin-13 OS=Homo sapiens GN=MYH13 PE=1 SV=2
Q9UMS6|SYNP2_HUMAN	212	118069	0	0	0		Synaptopodin-2 OS=Homo sapiens GN=SYNPO2 PE=1 SV=2
Q9Y623|MYH4_HUMAN	433	223902	0	0	0		Myosin-4 OS=Homo sapiens GN=MYH4 PE=1 SV=2
Q71DI3|H32_HUMAN	41	15436	0.65303	0	1		Histone H3.2 OS=Homo sapiens GN=HIST2H3A PE=1 SV=3
P02545|LMNA_HUMAN	197	74380.3	0.673369	0	1		Prelamin-A/C OS=Homo sapiens GN=LMNA PE=1 SV=1
Q8WWI1|LMO7_HUMAN	69	194002	0.704458	0	1		LIM domain only protein 7 OS=Homo sapiens GN=LMO7 PE=1 SV=3
P19237|TNNI1_HUMAN	116	21850.1	0.817134	1.37933	2		Troponin I, slow skeletal muscle OS=Homo sapiens GN=TNNI1 PE=1 SV=3
P08670|VIME_HUMAN	704	53676.6	0.823217	1.27157	4		Vimentin OS=Homo sapiens GN=VIM PE=1 SV=4
P17661|DESM_HUMAN	981	53560.7	0.832275	1.47311	7		Desmin OS=Homo sapiens GN=DES PE=1 SV=3
Q96A32|MLRS_HUMAN	193	19117	0.835835	0	1		Myosin regulatory light chain 2, skeletal muscle isoform OS=Homo sapiens GN=MYLPF PE=2 SV=1
Q14697|GANAB_HUMAN	129	107263	0.862455	0	1		Neutral alpha-glucosidase AB OS=Homo sapiens GN=GANAB PE=1 SV=3
A5A3E0|POTEF_HUMAN	212	123021	0.875812	1.51371	5		POTE ankyrin domain family member F OS=Homo sapiens GN=POTEF PE=1 SV=2
Q6S8J3|POTEE_HUMAN	212	122883	0.875812	1.51371	5		POTE ankyrin domain family member E OS=Homo sapiens GN=POTEE PE=1 SV=3
A6NMY6|AXA2L_HUMAN	167	38806.4	0.881348	0	1		Putative annexin A2-like protein OS=Homo sapiens GN=ANXA2P2 PE=5 SV=2
Q14315|FLNC_HUMAN	339	293407	0.885768	1.24897	3		Filamin-C OS=Homo sapiens GN=FLNC PE=1 SV=3
P55060|XPO2_HUMAN	45	111145	0.902504	0	1		Exportin-2 OS=Homo sapiens GN=CSE1L PE=1 SV=3
Q5QNW6|H2B2F_HUMAN	87	13912.1	0.902504	0	1		Histone H2B type 2-F OS=Homo sapiens GN=HIST2H2BF PE=1 SV=3
Q96A08|H2B1A_HUMAN	90	14159.2	0.902504	0	1		Histone H2B type 1-A OS=Homo sapiens GN=HIST1H2BA PE=1 SV=3
Q9P2E9|RRBP1_HUMAN	161	152780	0.907596	0	1		Ribosome-binding protein 1 OS=Homo sapiens GN=RRBP1 PE=1 SV=4
P12883|MYH7_HUMAN	982	223758	0.908083	1.11384	2		Myosin-7 OS=Homo sapiens GN=MYH7 PE=1 SV=5
P68133|ACTS_HUMAN	678	42366.5	0.910398	1.34539	14		Actin, alpha skeletal muscle OS=Homo sapiens GN=ACTA1 PE=1 SV=1
P11021|GRP78_HUMAN	163	72403	0.915074	0	1		78 kDa glucose-regulated protein OS=Homo sapiens GN=HSPA5 PE=1 SV=2
P04406|G3P_HUMAN	193	36202	0.932559	0	1		Glyceraldehyde-3-phosphate dehydrogenase OS=Homo sapiens GN=GAPDH PE=1 SV=3
P68032|ACTC_HUMAN	908	42334.5	0.956741	1.36399	16		Actin, alpha cardiac muscle 1 OS=Homo sapiens GN=ACTC1 PE=1 SV=1
P60709|ACTB_HUMAN	585	42052.4	0.960827	1.42103	11		Actin, cytoplasmic 1 OS=Homo sapiens GN=ACTB PE=1 SV=1
P07951|TPM2_HUMAN	369	32945.1	0.996233	2.83075	4		Tropomyosin beta chain OS=Homo sapiens GN=TPM2 PE=1 SV=1
P49411|EFTU_HUMAN	207	49852.8	1.06321	1.0434	2		Elongation factor Tu, mitochondrial OS=Homo sapiens GN=TUFM PE=1 SV=2
P21333|FLNA_HUMAN	129	283301	1.06778	1.86728	2		Filamin-A OS=Homo sapiens GN=FLNA PE=1 SV=4
P62158|CALM_HUMAN	82	16827.3	1.09195	0	1		Calmodulin OS=Homo sapiens GN=CALM1 PE=1 SV=2
P27797|CALR_HUMAN	168	48283.4	1.10602	1.35411	2		Calreticulin OS=Homo sapiens GN=CALR PE=1 SV=1
P27824|CALX_HUMAN	79	67982.5	1.1178	0	1		Calnexin OS=Homo sapiens GN=CANX PE=1 SV=2
P11055|MYH3_HUMAN	1919	224850	1.13296	1.41894	9		Myosin-3 OS=Homo sapiens GN=MYH3 PE=1 SV=3
P67809|YBOX1_HUMAN	212	35903.2	1.14162	1.21637	3		Nuclease-sensitive element-binding protein 1 OS=Homo sapiens GN=YBX1 PE=1 SV=3
P18124|RL7_HUMAN	41	29264.7	1.14426	0	1		60S ribosomal protein L7 OS=Homo sapiens GN=RPL7 PE=1 SV=1
P61313|RL15_HUMAN	98	24245.6	1.15984	1.52337	2		60S ribosomal protein L15 OS=Homo sapiens GN=RPL15 PE=1 SV=2
P07355|ANXA2_HUMAN	208	38808.4	1.17698	1.50542	2		Annexin A2 OS=Homo sapiens GN=ANXA2 PE=1 SV=2
P48681|NEST_HUMAN	927	177789	1.21311	1.47966	9		Nestin OS=Homo sapiens GN=NES PE=1 SV=2
P35609|ACTN2_HUMAN	272	104359	1.24112	1.30896	2		Alpha-actinin-2 OS=Homo sapiens GN=ACTN2 PE=1 SV=1
P09382|LEG1_HUMAN	56	15048.8	1.33671	0	1		Galectin-1 OS=Homo sapiens GN=LGALS1 PE=1 SV=2
P68363|TBA1B_HUMAN	222	50804.4	1.35892	0	1		Tubulin alpha-1B chain OS=Homo sapiens GN=TUBA1B PE=1 SV=1
Q13748|TBA3C_HUMAN	224	50612.4	1.35892	0	1		Tubulin alpha-3C/D chain OS=Homo sapiens GN=TUBA3C PE=1 SV=3
Q9BQE3|TBA1C_HUMAN	202	50548.2	1.35892	0	1		Tubulin alpha-1C chain OS=Homo sapiens GN=TUBA1C PE=1 SV=1
Q8WZ42|TITIN_HUMAN	117	3.8429e+06	1.46851	0	1		Titin OS=Homo sapiens GN=TTN PE=1 SV=4
Q07020|RL18_HUMAN	60	21735.6	1.49061	0	1		60S ribosomal protein L18 OS=Homo sapiens GN=RPL18 PE=1 SV=2
P14618|KPYM_HUMAN	94	58470.7	1.51411	0	1		Pyruvate kinase isozymes M1/M2 OS=Homo sapiens GN=PKM2 PE=1 SV=4
